# Supplementary material for: Site-specific gains and losses of heterochromatin accelerate the age-related neurodegeneration through the cascading destruction of KDM3B-centered epigenomic network
Source: Research Square preprint supplement (doi:10.21203/rs.3.rs-1246914/v1), 2022-01-14
Supplement: Supplementary file 1 [file 21454a0f8ce7bfb360a9d187.xlsx]

## Sheet: Supplementary Table 1
Supplementary Table 1. Differentially expressed genes in aged mice retinas.
	WT_01M_1	WT_01M_2	WT_06M_1	WT_06M_2	WT_12M_1	WT_12M_2	WT_18M_1	WT_18M_2
Rp1-201	220.189	233.692	322.547	287.779	221.779	252.502	379.224	347.124
Tcea1-201	29.9677	37.2945	24.8128	29.0846	37.4863	39.7398	48.3019	46.8773
Arfgef1-201	27.6127	30.9883	36.504	30.3197	35.6907	40.2989	35.1014	32.5628
Rpl7-201	314.983	309.386	291.837	279.957	148.432	140.152	247.446	221.86
Ogfrl1-201	19.5164	22.8937	15.0764	17.0412	30.3568	30.098	20.4677	17.701
Gm29216-201	2106.79	2533.81	3144.17	3925.66	3172.74	3118.51	2748.54	2252.16
Plekhb2-201	120.554	128.828	127.324	132.713	147.327	145.865	111.718	115.586
Kansl3-201	25.3837	24.8648	31.9205	27.5911	24.8283	26.0028	22.2663	23.3278
Actr1b-201	58.686	46.6231	46.6666	44.3111	45.0184	46.5022	39.2647	42.1927
Rpl31-202	150.417	151.391	144.708	184.102	99.0896	82.2738	157.075	175.957
Gls-204	38.2763	41.1408	50.2638	48.6992	65.2067	67.567	62.4876	58.5219
Ormdl1-201	18.6655	16.0703	17.5557	16.4499	22.9339	23.8333	30.7346	29.7067
Sf3b1-201	37.0007	39.2012	45.3562	39.1814	46.838	48.7447	48.7777	46.9035
Hspd1-201	42.6768	56.5845	40.4843	39.2682	52.098	49.3923	47.5612	45.3081
Hspe1-201	44.1512	45.4536	39.9445	31.7453	34.6521	38.2151	54.0662	57.54
Clk1-201	33.413	30.9727	29.1442	29.0209	38.7466	37.7855	77.1026	62.4198
Clk1-213	20.987	19.6483	29.0444	34.5875	14.4462	13.9078	35.4076	36.9958
Ndufb3-201	89.4205	77.1155	68.1547	65.9133	53.6097	51.5506	77.1674	74.0871
Trak2-201	35.9476	37.5092	30.8269	31.1356	34.167	37.0643	29.9683	31.618
Mpp4-202	138.138	135.089	166.669	165.351	139.81	137.048	166.623	157.32
Mpp4-207	38.7622	35.7819	46.4191	49.9392	31.3216	30.0912	59.721	55.2392
Sumo1-201	62.5291	64.3738	58.7039	62.6911	71.0822	74.3283	95.86	98.7906
Map2-202	54.4969	56.1405	59.7272	53.6963	60.1326	57.1411	56.4606	54.4178
Mreg-201	18.4047	21.6539	24.261	25.3381	31.3295	27.9672	21.115	18.6433
Rpl37a-201	256.411	234.376	196.98	260.924	136.96	129.701	230.334	271.537
Aamp-201	75.4899	62.4922	53.9865	55.2995	59.272	51.838	46.384	54.1678
Cdk5r2-201	102.657	83.1933	79.3508	83.3392	54.7928	48.6781	41.2767	43.8837
Tuba4a-201	25.829	22.8377	20.2994	20.7809	34.8498	35.4495	28.9126	31.6526
Ptprn-201	30.3932	28.8936	44.2318	42.7759	57.3719	50.1422	35.1429	39.0059
Farsb-201	16.758	17.2483	26.1588	23.7946	24.0443	23.0098	29.9988	34.0107
Acsl3-205	60.5731	77.0974	34.3938	38.5062	83.3033	74.9656	65.3519	58.7241
Scg2-202	111.688	99.9277	105.179	108.957	100.426	107.197	101.571	87.7162
Cul3-202	51.4238	54.2443	61.6504	56.346	43.466	47.4618	47.5267	44.5661
Dner-201	15.3667	17.8006	18.261	17.3014	32.6175	31.8824	20.7554	18.8077
Itm2c-201	123.999	107.324	103.777	97.1019	119.808	110.674	93.1192	102.226
Psmd1-201	42.3093	34.5703	30.8453	35.2443	39.0993	39.805	34.9247	30.9139
Ncl-202	112.857	105.277	73.4276	85.8033	55.317	54.8683	53.898	50.3023
Ptma-201	230.219	251.833	209.852	177.085	264.253	264.377	278.199	267.497
Pde6d-201	138.549	118.119	131.809	121.517	77.6439	67.4218	96.6538	94.5841
Sag-203	21.9752	28.6566	20.6117	20.5399	17.735	21.3558	43.1974	49.3009
Sag-201	2733.13	2649.73	2913.25	3124.75	2046.4	2051.52	3029.13	3048.7
Sag-206	27.5101	28.2027	32.103	27.6376	28.0845	31.7162	55.6826	54.9202
Dgkd-201	33.5116	30.4311	28.142	30.0819	30.2937	29.4866	29.9678	31.6704
Cops8-201	26.4722	20.9344	23.8812	22.8818	30.6545	31.6912	25.2843	27.6279
Cops9-201	86.6596	67.5172	90.3098	70.0626	57.9246	48.8521	95.5416	124.115
Kif1a-204	73.7775	65.514	70.6013	62.5354	83.263	85.4598	56.7588	57.5558
Hdlbp-202	29.8698	32.2812	32.717	32.5366	32.3578	31.3436	23.6985	23.5621
Stk25-204	41.4133	43.5044	48.2102	51.5928	53.0439	48.2985	53.3615	54.4409
Dbi-201	88.2167	85.9343	49.5415	58.2505	107.741	94.9341	90.1057	94.3333
Ubxn4-201	31.7679	32.417	31.9193	34.2803	28.9541	29.1229	31.0781	29.1575
Tmcc2-201	24.9668	30.7567	20.6332	23.3183	23.4138	18.4247	13.0271	15.2294
Nfasc-202	34.2329	37.9563	37.7155	37.8172	33.7705	34.593	34.4411	34.8206
Btg2-201	38.9267	46.8048	30.8509	35.0492	33.5997	35.5236	39.3456	38.8283
Adipor1-201	190.318	201.679	183.165	201.999	161.019	159.163	140.8	131.492
Adipor1-202	60.2209	56.1805	62.0445	75.7476	59.0498	55.3358	56.4555	68.3452
Kdm5b-203	30.954	30.2362	26.8678	30.7605	22.0769	22.7294	24.7496	23.3164
Arl8a-201	56.914	64.917	47.8418	41.9937	33.7325	28.7785	28.905	23.7474
Shisa4-203	49.2691	46.3387	32.9096	29.9372	38.0587	36.5316	22.6357	26.5281
Tmem9-201	37.8439	48.8697	40.6264	46.4601	41.9151	41.7579	43.361	44.4641
Crb1-204	57.1473	57.8602	55.2858	42.1977	12.9971	14.3441	57.9838	55.2587
Pdc-204	1872.26	1993	1828.78	1895.61	812.76	883.185	1805.87	1750.46
Pdc-203	1210.3	1332.76	1163.25	1447.57	236.878	276.334	825.024	768.302
Rgs8-202	21.0837	22.0151	19.0725	21.7066	33.4608	31.0891	18.4319	16.6471
Glul-201	920.026	893.388	626.118	693.326	914.526	882.798	520.522	530.347
BC034090-201	39.6903	34.8061	24.4574	28.9135	24.6274	27.2096	23.337	29.1075
Cacybp-201	28.1524	33.3919	29.5271	28.9799	33.1198	32.4964	43.4075	35.7322
Gas5-210	76.6368	77.2587	67.9546	72.6454	34.0226	27.4932	59.3682	72.6536
Atp1b1-201	99.386	104.03	72.8033	71.4269	162.437	160.707	116.329	108.794
Uap1-202	31.2116	29.3435	34.1342	30.9237	27.5131	28.1397	28.466	24.7121
Pcp4l1-201	58.1106	57.4534	68.4373	67.0967	56.6696	54.0737	65.5791	65.2925
Ndufs2-201	83.6755	89.8165	93.9161	107.23	92.134	89.1195	92.4974	90.0362
Copa-206	57.703	51.7703	35.8925	42.2797	32.7558	32.6783	34.9367	40.7601
Dcaf8-206	32.7151	28.5342	33.4954	26.5872	23.7608	21.6087	26.5513	26.2396
Pea15a-201	258.358	269.308	257.941	258.591	222.803	230.369	209.468	211.892
Cadm3-202	63.1944	56.5062	57.3069	53.3737	60.767	61.0204	50.1487	50.8319
Cadm3-201	30.0076	27.3565	18.8239	18.7895	10.6105	13.4964	12.6446	12.169
Hnrnpu-206	107.893	126.84	130.392	126.395	69.8013	68.0815	71.2868	67.8027
Hnrnpu-201	30.9776	29.7647	36.4653	32.024	52.2248	55.492	74.2856	67.1167
H3f3a-201	248.476	231.566	145.602	177.264	219.355	212.139	243.799	251.004
H3f3a-207	200.724	238.527	302.847	256.338	217.408	225.278	261.838	274.222
Srp9-201	34.7731	42.6322	31.2227	39.1993	33.18	34.4513	41.6586	42.2411
Eprs-201	31.9476	31.7085	25.1149	28.4622	25.3083	25.3562	26.4364	25.4029
Ush2a-201	19.577	17	30.2469	26.8171	12.4767	16.3464	20.0362	20.4892
Lpgat1-201	39.121	43.3034	40.403	39.0227	43.7099	42.5035	36.8741	35.8703
Rd3-203	122.075	120.283	107.886	119.617	79.0784	78.6067	78.4137	91.1023
A330023F24Rik-204	13.7269	16.0485	18.7092	15.5939	17.2903	17.6549	49.2176	51.3165
Phyh-201	49.9543	64.2126	42.1306	51.6604	58.1867	53.1736	57.3066	58.3412
Optn-202	46.1855	57.0923	55.1588	67.718	46.7067	51.2805	50.4224	50.8901
Camk1d-201	33.5188	32.8172	34.4818	31.9888	22.49	24.708	28.2298	26.8553
Cacnb2-203	33.8701	31.2126	31.8523	27.2988	27.3522	28.9274	34.3748	30.426
Mrpl41-201	33.1423	41.5256	49.0696	46.4847	32.1608	35.2782	46.988	47.452
Tubb4b-201	78.1029	80.6285	77.5317	91.0783	90.8536	81.9153	71.6761	70.4845
Edf1-201	118.737	108.401	91.3891	114.984	75.5865	70.313	73.2811	88.5384
Phpt1-201	32.8741	27.915	34.2089	26.4461	35.0341	31.3434	28.483	26.7253
Phpt1-202	52.093	57.2828	39.7657	36.0211	20.6794	17.588	15.881	19.8919
Camsap1-209	26.2937	30.1406	32.6186	36.0897	25.1307	27.9306	28.6318	27.3917
Gpsm1-201	33.1274	32.4463	41.0018	35.5225	29.6302	23.4104	25.4438	32.8035
Rpl7a-201	276.467	259.008	245.861	275.005	163.15	156.07	210.866	235.714
6530402F18Rik-203	23.3412	30.5259	49.7634	46.8816	31.0593	31.4592	45.6953	49.2682
Sptan1-203	77.6119	85.5061	91.6945	93.1433	88.2553	88.3816	77.8093	77.8264
Set-201	35.9869	46.3634	32.8082	40.7676	50.4621	43.3395	41.7169	36.8918
Ptpa-201	37.1747	33.6759	32.2844	34.2458	41.8465	34.9222	27.4532	26.9872
BC005624-201	44.819	42.3265	38.1559	42.687	30.2209	30.0285	28.0838	29.4774
Prrc2b-202	39.9471	41.4405	45.8881	44.1116	34.431	37.2235	31.1533	32.8834
Dnm1-204	38.08	42.063	49.3415	50.7118	53.1155	54.4827	52.9354	54.4709
Stxbp1-201	207.659	200.673	161.401	169.865	190.667	194.146	100.829	100.312
Stxbp1-202	168.866	150.141	166.444	165.481	168.592	160.349	114.465	116.648
Rpl12-203	74.0702	73.2786	75.1365	74.6714	18.0096	14.8634	65.8317	76.2254
Rpl12-201	78.9927	101.415	102.439	96.3816	69.6049	69.4939	97.4657	95.1526
Hspa5-202	111.051	108.452	124.041	138.309	88.0594	88.4305	98.1059	93.6308
Rab14-201	29.6094	38.774	24.1092	26.7925	52.8699	54.8102	44.5273	41.839
Rab14-213	24.6718	28.0016	31.1506	31.9322	0	0	0	0
Ndufa8-201	52.7368	54.8363	55.3147	64.5435	42.2158	42.7594	41.0577	46.3263
Kif5c-201	27.1124	27.6428	26.2943	21.1676	33.8185	34.1162	23.9113	22.1077
Dapl1-201	49.8366	45.2922	43.1454	38.6842	30.181	22.8814	23.4927	18.8087
Pla2r1-201	32.0055	29.4796	30.646	32.4167	32.8924	36.1623	42.472	41.413
Psmd14-201	33.6091	39.7044	25.1156	31.7538	31.7855	29.1319	35.2457	33.2547
Gorasp2-201	45.9933	58.118	56.7567	57.9781	47.9833	45.1798	39.4107	42.9866
Dync1i2-202	15.8169	17.4577	40.4091	31.038	14.6172	15.0055	17.6113	15.5947
Chn1-215	61.3055	60.2004	44.2074	48.1476	45.7413	49.9307	41.7729	45.4396
Atp5g3-202	62.3939	58.815	41.6617	35.72	60.8726	53.8224	52.942	63.4256
Atp5g3-201	133.813	144.821	120.591	133.552	157.943	142.495	168.533	165.594
Hnrnpa3-203	35.2441	33.9782	35.1812	30.3722	63.0982	64.5012	62.812	56.0515
Ube2e3-202	38.5376	38.1474	34.3758	31.3247	20.2079	23.3557	25.3067	25.9232
Neurod1-201	120.456	116.043	136.366	137.066	129.358	133.638	150.383	148.173
Zc3h15-201	29.1553	32.7999	31.9029	29.7177	34.9271	38.7555	33.4641	33.8104
Fam171b-201	41.0722	47.7629	66.2476	56.739	60.7053	64.1399	61.4154	56.5757
Tmx2-201	55.5641	48.7176	75.0297	58.1488	68.7748	70.9866	65.4846	64.8555
Zdhhc5-201	51.6603	41.3769	68.3903	63.0207	30.4328	32.9866	39.6983	39.5386
Ndufs3-201	38.6051	49.1348	49.0088	41.6828	45.8374	43.8205	51.0857	52.9314
Madd-208	54.4365	53.268	67.863	56.5912	55.7319	53.3987	51.6385	52.6686
1110051M20Rik-202	28.5747	29.0334	30.8825	23.8708	15.2083	20.0254	21.2153	19.5381
Cry2-201	34.5726	30.405	20.7406	23.3386	34.718	34.2681	22.3747	23.9836
Hsd17b12-201	40.9695	44.8215	52.5599	40.432	47.2585	46.1575	44.8342	44.2197
Api5-201	25.6843	24.5382	29.0706	23.2706	32.4025	32.2863	34.8878	34.5038
Trim44-201	45.3641	47.5074	44.8222	40.5316	47.0352	51.005	44.2711	43.3883
Caprin1-202	29.6559	31.5646	42.1253	34.2913	35.5278	37.2484	35.83	33.4458
Cd59a-201	31.3271	26.2624	43.8598	33.6363	52.1143	50.3042	39.7337	37.1468
Emc4-201	74.8208	56.952	53.9421	59.4049	61.206	56.979	70.3164	78.0363
Scg5-201	164.79	124.513	127.686	147.487	143.76	147.955	157.317	150.182
Gjd2-201	27.4976	24.8294	22.287	19.0846	32.0844	32.789	27.4037	28.7181
Srp14-201	61.4196	71.7525	49.711	65.7084	58.3957	63.485	78.7702	77.127
Rmdn3-201	48.2131	48.788	32.9524	37.1226	40.1512	42.2072	51.8915	49.7296
Oip5os1-202	46.2298	57.1854	54.6623	50.4707	59.5753	66.9769	63.2662	59.5837
Zfp106-201	40.1398	38.3764	35.2946	39.0549	32.725	34.093	31.8439	30.855
Ckmt1-201	90.2171	88.7868	120.437	134.246	93.7109	88.8961	90.3926	93.6271
Pdia3-201	49.39	55.2759	60.6286	56.9212	46.0203	48.2789	49.8013	42.3596
Serf2-204	40.8211	40.2424	28.8442	35.0519	25.9226	24.6089	31.9259	36.753
Eid1-201	110.309	109.753	80.8969	92.1288	95.4102	92.2968	118.301	105.317
Cops2-201	18.5098	20.7589	18.6427	16.6948	17.0843	20.5931	33.2588	31.9582
Hdc-201	6.22866	6.5226	24.6862	21.3747	22.2955	20.7409	29.9	30.5895
Snrnp200-201	50.1558	43.0575	45.7022	46.4887	38.3975	39.3739	31.5415	31.8314
Stard7-202	33.0147	25.7226	48.8442	49.1411	50.3485	51.4007	51.7094	40.5044
Stard7-204	54.6305	47.2017	31.4374	40.3431	47.9695	43.1033	67.7484	73.2333
Stard7-201	24.1515	27.4597	35.8456	27.6768	21.7262	23.4456	39.5539	39.4328
Mtln-201	24.4621	29.1901	33.8156	26.2699	26.6654	25.3043	41.0425	49.1983
AI847159-203	123.157	110.388	101.616	93.3013	76.393	86.2033	142.129	132.451
Slc20a1-201	24.3552	28.538	27.9365	26.1865	33.8521	30.5872	30.3404	28.6456
Stk35-201	63.6156	72.4824	83.7111	83.5512	45.4176	53.0993	71.5856	75.9459
Stk35-202	112.621	108.866	133.591	129.242	119.53	115.194	114.905	115.286
Ddrgk1-201	106.784	85.5002	62.2499	80.0223	61.2296	55.7484	46.0467	53.2998
Itpa-201	25.0528	26.4839	25.5135	26.3273	24.8085	28.2972	31.3691	25.351
Prnp-201	223.037	205.373	235.659	236.45	210.524	203.389	190.617	193.01
Pcna-201	34.7805	42.4893	52.4525	40.2937	47.4798	46.0182	63.9639	61.0438
Chgb-201	164.379	179.534	141.937	164.181	135.377	137.12	71.1089	74.271
Snap25-201	310.786	375.584	362.001	289.063	518.998	516.312	518.146	486.034
Snap25-202	195.152	162.968	111.088	137.295	66.892	68.4774	50.62	55.4875
Dstn-201	86.3794	107.631	77.4128	80.5925	99.7076	103.352	106.458	98.2241
Slc24a3-204	27.4956	29.8461	19.2194	25.3011	29.0885	31.7338	19.167	19.2992
Napb-201	69.4546	77.4052	46.7596	56.556	82.384	85.1802	74.0483	71.103
Cst3-201	777.672	738.72	644.789	682.477	586.049	513.221	847.629	927.664
Fkbp1a-201	56.1632	51.2946	56.1473	42.6615	52.2772	48.5852	47.3374	43.1119
Bcl2l1-201	25.4886	31.8116	25.0187	23.5112	25.6638	25.4735	18.4034	17.1584
Pdrg1-201	28.3307	28.838	32.5907	27.8435	31.5627	33.1226	34.2982	34.9436
Snta1-202	33.1266	32.9466	32.6702	32.0638	31.0519	26.2836	27.2177	28.6588
Chmp4b-201	82.3184	101.154	86.0582	88.6728	78.1789	70.2934	71.747	77.9378
Raly-202	95.3682	81.3692	114.512	101.355	83.1641	84.5951	81.1748	84.3713
Eif2s2-201	26.6541	26.0752	20.2783	23.2189	16.7432	17.1238	31.0136	29.7197
Dynlrb1-202	146.511	160.788	157.287	119.079	100.981	94.3075	123.473	116.551
Trpc4ap-201	34.5437	38.7496	35.1924	34.3138	36.4899	30.6743	30.4146	26.9758
BC029722-201	29.8726	26.3302	24.6686	24.3103	32.2527	31.1742	23.4473	24.9268
Rbm39-201	32.1021	34.7562	43.1225	37.9313	46.8308	46.3892	67.6381	56.0263
2900097C17Rik-202	64.7284	65.1369	61.5391	58.0009	96.6022	92.2761	55.1814	53.6365
Rab5if-201	41.0748	38.1549	42.4207	44.9745	34.2871	28.3048	48.2222	49.5948
Ndrg3-202	140.308	185.06	141.796	137.671	130.225	140.135	149.035	140.084
Blcap-202	34.6225	33.1069	39.2523	31.2247	46.6904	44.0776	31.9966	31.3487
Snhg11-206	26.5771	26.5804	22.2815	25.738	86.8668	93.7449	77.6808	73.1733
Snhg11-201	26.5771	26.5804	22.2815	25.738	86.8668	93.7449	77.6808	73.1733
Snhg11-207	51.1848	43.9555	50.0999	47.5143	90.8466	75.0022	61.5144	60.5334
Slc32a1-201	30.185	29.3308	23.5297	25.8308	38.0973	33.3378	18.6024	20.3426
Top1-201	30.2667	28.3232	27.4289	26.7358	22.8541	24.2908	24.604	22.8667
Srsf6-203	15.3549	12.6781	20.0615	18.0684	35.8493	35.2701	44.3562	37.9863
Serinc3-201	52.9425	64.1527	58.6074	53.6411	70.9955	75.6404	67.1724	61.6091
Pkig-201	53.0736	46.5085	32.8599	35.9793	36.0843	30.8793	37.4554	40.5917
Ywhab-201	111.692	122.332	81.0712	86.9977	109.879	108.474	91.4918	84.234
Pigt-201	70.7998	73.2367	56.367	65.8276	58.9722	51.5435	34.7008	40.994
Ctsa-202	37.191	32.2945	28.5286	33.4219	31.6305	30.6718	21.2492	24.7681
Slc12a5-201	98.1687	110.069	124.989	112.726	118.071	109.482	102.53	113.101
Kcnb1-204	134.843	156.372	242.084	239.483	114.79	130.149	133.57	135.475
Kcnb1-203	106.78	80.6954	97.5656	107.921	55.8956	51.5537	33.4219	31.7265
Gm20716-201	25.5923	20.364	32.5435	35.8673	44.571	46.6126	38.3506	38.324
Rtf2-201	36.1594	28.4617	28.6649	26.4881	29.0221	31.3748	22.8939	25.7223
Gnas-208	302.712	243.972	196.53	218.71	227.869	211.549	152.595	160.369
Atp5e-201	129.481	117.597	132.295	143.424	114.378	109.373	158.9	193.126
Psma7-201	79.887	80.3298	55.0918	71.6112	56.3094	54.1655	81.4519	87.9157
Osbpl2-201	31.1317	30.6831	25.4279	22.2906	26.101	25.764	23.2441	20.5294
Adrm1-201	50.5337	38.3649	24.4733	31.1968	31.7074	25.5559	24.9362	26.4668
Rps21-201	275.056	297.511	315.033	277.315	245.483	227.879	357.404	391.669
Eef1a2-201	132.374	133.217	120.702	122.343	133.817	132.016	82.2026	96.9148
Stmn3-201	161.963	128.5	95.4552	110.908	115.314	105.627	133.233	138.447
Dnajc5-201	31.1523	34.7252	41.1602	32.4733	41.6235	38.2209	31.6483	30.1016
Dnajc5-204	57.9017	50.5768	43.8138	46.1643	29.8332	34.7189	35.6849	34.8896
Uckl1-207	60.1999	46.0986	58.4676	58.7944	44.0829	45.6561	77.326	80.5878
Uckl1os-201	60.4413	49.6985	55.6782	52.0453	32.996	32.5892	41.0389	44.8194
Prpf6-201	30.7036	29.3168	22.7034	29.6655	26.0413	25.8271	19.9116	21.485
Pcmtd2-201	65.1528	84.3737	92.232	78.8058	172.176	158.141	208.938	196.667
Syp-201	530.919	510.206	454.334	515.157	369.537	365.794	317.373	336.516
Praf2-201	47.9076	43.8664	46.0945	45.1726	39.4422	38.2267	36.017	30.8144
Tspan7-201	330.413	319.751	287.509	297.592	339.407	324.046	221.615	226.015
Atp6ap2-201	49.3539	47.5426	46.9287	45.26	90.2319	91.5291	79.9088	74.358
Ddx3x-201	49.8487	54.7905	53.2717	50.9191	70.3168	71.6916	79.7582	71.4313
Ndufb11-201	136.087	158.408	126.998	155.166	115.872	109.971	154.312	162.447
Uba1-201	93.673	92.0047	89.5421	87.516	85.4437	82.473	68.9794	66.7809
Cdk16-201	41.8598	43.862	48.4901	41.6384	43.513	41.5183	30.8958	32.2062
Araf-203	14.356	11.916	17.3048	18.1344	19.0129	22.4551	42.0398	39.0397
Pgrmc1-201	87.5859	73.8585	64.8819	63.4267	105.228	105.284	92.1565	91.0093
Slc25a5-201	162.683	193.669	196.394	173.699	180.637	176.365	242.795	235.351
Rpl39-201	102.016	117.054	95.6501	106.949	123.86	113.458	172.714	192.071
Upf3b-201	36.0185	28.9304	32.2231	30.6667	29.9532	29.4439	41.5486	35.1376
Hprt-201	68.2505	86.9431	94.5304	74.6255	112.071	110.34	129.542	120.211
Rbmx-205	28.2762	26.1729	33.7968	27.1535	22.4635	22.998	36.2274	39.2461
Ids-201	20.0009	22.4274	15.7628	16.4868	32.1579	33.5423	22.9543	20.7199
Opn1mw-201	140.604	118.97	130.896	116.828	64.9856	58.9837	61.0557	70.3974
Atp6ap1-201	103.445	108.776	91.2078	87.3377	106.252	102.349	83.5803	75.6133
Gdi1-201	98.6195	89.696	91.3248	78.8687	104.293	96.9411	78.1539	80.3949
G6pdx-201	40.7306	31.3959	37.6957	37.6712	32.5269	33.6972	32.6404	30.3595
Maged1-201	146.728	134.291	110.684	115.213	128.186	129.354	105.105	99.4619
Las1l-201	30.2625	26.8035	27.0012	22.2752	29.1837	28.1913	24.7065	23.7423
Pja1-205	48.6555	45.4982	36.6877	40.1599	47.1552	43.7494	39.2306	45.3001
Arr3-201	91.5774	96.309	84.8938	91.5161	60.4261	61.5129	75.8834	74.4834
Arr3-202	47.487	45.2616	44.8751	51.9386	70.8115	65.4622	98.9988	109.47
Pdzd11-202	30.4985	26.0078	24.4583	30.1317	20.1937	18.8416	25.525	31.1603
Nono-201	85.9613	86.9686	61.7131	73.0919	63.9438	61.7376	71.2291	68.1309
Rps4x-201	229.579	246.882	252.979	245.414	241.203	219.674	303.683	300.781
Magee1-201	18.2032	23.095	22.8452	20.7936	31.329	30.2256	19.9653	19.3017
Cox7b-201	74.952	69.2732	55.527	48.5704	41.8979	42.8565	88.5222	83.5469
Pgk1-201	305.657	273.095	385.841	347.558	393.225	389.495	353.956	340.748
Gprasp1-206	42.64	54.8573	49.8895	46.2999	76.2404	73.7559	54.6593	47.6034
Arxes2-201	41.6793	34.9788	26.2277	28.8009	42.855	43.4753	44.0485	41.6918
Bex2-201	152.947	176.846	86.7913	97.1464	102.408	91.2982	94.9534	99.6346
Tceal8-201	24.4059	21.1291	16.8225	21.3714	23.4449	21.8168	31.6985	26.8801
Tceal9-201	72.9318	69.2504	51.8691	39.9656	55.3852	53.9367	67.7748	68.3321
Gucy2f-201	29.6051	32.1102	42.8591	41.4456	30.3321	36.5857	58.6068	53.6499
Gnl3l-202	28.2804	30.5985	22.9596	23.7395	32.2426	35.2859	30.0872	28.352
Smc1a-201	45.5237	37.5529	28.2165	35.0938	24.4815	25.937	25.0654	24.2697
Ubqln2-201	34.8832	39.2771	37.2201	30.8293	46.6369	43.9126	33.0968	34.1249
Pdha1-201	37.0556	43.7723	28.8155	33.5368	36.3606	35.4293	34.5863	32.7407
Rs1-201	373.213	385.677	401.149	383.065	331.589	376.179	403.83	385.453
Tmsb4x-201	114.397	120.895	96.7195	96.8649	136.32	128.789	181.603	166.815
Stmn2-201	31.3725	40.3863	29.1155	24.3613	31.4711	34.052	33.9929	36.1122
Tpd52-204	52.0766	60.9567	78.5288	61.0402	33.1685	36.33	36.1846	33.5478
Fabp12-201	32.3152	32.0496	25.5205	30.3848	22.9618	24.0926	46.1324	42.2937
Car2-201	188.876	168.275	179.367	205.722	300.877	302.17	243.668	231.207
Mir124-2hg-201	158.758	172.446	201.103	205.931	223.22	239.955	344.177	329.599
Mtfr1-204	26.9286	29.6633	28.6763	26.927	37.0315	35.8034	36.0124	35.3872
Gm7536-201	127.034	163.297	154.754	126.928	75.8004	81.2648	137.487	114.109
Rpl22l1-206	30.2934	28.5528	21.7589	23.1021	43.1972	37.3602	60.3113	55.5473
Samd7-201	70.293	70.5289	40.6724	44.4633	35.5723	32.5274	38.8322	39.3707
Sec62-201	38.2428	48.8021	25.8162	34.1055	37.8771	40.4007	41.0445	40.818
Pex5l-206	74.3753	83.5127	107.404	120.288	62.794	74.8007	96.4415	83.8621
Pex5l-202	46.625	43.2317	70.7529	66.5918	43.4172	48.067	78.1813	75.5161
Ttc14-201	8.26166	10.2175	10.983	9.70244	20.8375	23.6029	39.0022	33.8167
Atp11b-201	30.6788	34.3859	40.2663	33.3774	24.0168	27.9027	33.1592	27.6524
Bbs7-203	56.9446	58.4255	71.3002	76.7347	53.8008	60.5831	76.6936	68.8544
Hspa4l-201	43.4157	35.193	51.0336	44.1052	26.1152	30.1592	45.8366	38.9489
Mgarp-202	208.378	166.604	108.543	129.082	185.796	172.854	167.275	179.001
Mgarp-201	446.253	486.198	460.937	437.832	613.933	594.509	469.313	454.547
Ndufc1-204	97.0366	80.1226	51.0594	62.4022	54.5718	49.6139	46.0789	49.6438
Nbea-203	22.822	25.6785	20.9958	26.9112	30.1544	28.8579	23.8053	22.1586
Mab21l1-201	99.503	77.0945	103.106	103.571	102.017	101.9	120.226	118.041
Rnf13-201	16.867	17.1163	15.5346	13.9969	33.7192	33.2917	39.0985	36.4762
Gucy1b1-201	41.7327	34.1391	28.7427	28.8886	32.7726	34.659	33.1226	32.2916
Gucy1a1-201	31.7685	26.9938	25.4338	26.5754	41.9541	43.9223	25.6653	22.5405
Plrg1-204	30.1204	26.3612	26.3439	27.0289	23.1614	22.9496	30.323	28.4273
Rps3a1-201	279.517	303.94	322.673	301.417	235.622	220.942	298.748	291.946
Naxe-201	56.323	49.0217	49.3845	44.333	33.758	33.153	38.4812	40.4373
Mef2d-201	60.4255	63.5333	69.3759	72.5374	66.3205	64.2225	53.9871	59.697
Cct3-201	66.8684	54.9072	72.9025	72.5869	64.113	67.2198	71.4646	73.9411
Lamtor2-201	37.1731	41.4461	27.906	26.1392	28.8342	24.1808	27.5991	26.1779
Ssr2-207	50.1344	63.6496	54.6325	58.7947	46.3504	45.2634	51.4534	61.6603
Syt11-201	46.708	37.6123	31.4839	28.2397	37.073	39.4106	28.2322	27.8322
Fdps-201	47.5086	41.3008	50.171	46.9956	53.4099	50.3668	38.7503	38.0959
Pmvk-201	32.9286	30.4044	21.0386	27.0587	22.5497	21.8737	21.5189	20.0437
Rps27-201	525.08	425.927	393.876	433.229	266.241	260.245	526.918	574.243
Psmb4-201	59.9725	60.5553	64.3754	55.2393	60.8375	58.3403	74.9034	93.7817
Vps72-201	34.9621	30.186	21.3904	27.4318	19.7011	14.984	19.6968	16.6546
Anp32e-202	120.052	136.781	126.494	131.255	176.999	185.397	147.678	147.292
Sf3b4-201	36.3999	35.1984	28.6093	30.3024	24.9289	22.6208	20.0186	23.8357
Sv2a-201	91.3717	99.0213	78.7845	81.1076	105.777	100.217	63.8618	64.2278
Pde4dip-201	31.6883	38.2754	46.2841	45.4235	32.565	35.9351	36.5076	32.8257
Atp1a1-201	76.8967	76.058	82.7545	69.4725	85.3435	78.7447	50.1279	49.6855
Bcas2-201	39.8586	36.9457	22.2373	23.5912	35.8595	31.9598	23.9377	24.9567
Slc16a1-201	51.9629	50.0886	41.8478	42.3212	57.4396	53.1551	54.8382	53.2004
Capza1-201	18.5164	22.9785	24.5095	20.99	27.9563	31.8968	33.5988	30.2455
Lamtor5-202	46.8686	41.4485	39.8518	38.4173	49.7566	46.7268	73.1792	84.6139
Ahcyl1-201	79.6162	60.5695	88.4345	76.3944	78.705	74.7496	78.7236	79.772
Gnat2-206	47.4154	48.2106	61.8268	52.149	30.3744	24.924	29.6984	36.6151
Gnat2-204	8.00671	10.5093	12.617	13.4329	17.2729	16.2456	38.631	30.3806
Psma5-201	31.8281	40.8226	33.8062	34.5991	34.8527	32.5078	51.1112	47.1593
Wdr47-201	29.0853	31.085	47.3832	44.7871	43.6099	45.4632	55.1867	54.0691
Gpsm2-201	71.5965	72.9387	102.146	100.821	77.8587	82.0096	102.733	97.5051
Amy1-202	37.223	34.5768	55.2604	58.6546	71.4535	71.8405	126.441	116.579
Ptbp2-201	18.8933	16.1267	13.769	10.8473	24.6266	24.7878	31.6125	26.3995
Abca4-201	253.179	230.583	315.159	299.75	150.62	182.555	206.075	207.575
1810037I17Rik-201	39.3983	32.4823	25.2318	29.2939	23.5677	20.8872	31.1306	34.2486
Lrit3-202	24.8913	25.3482	36.4693	29.992	18.6787	20.6275	22.8057	25.2106
Rpl34-202	199.663	190.139	164.105	177.747	159.647	148.592	236.061	242.469
Ppa2-201	41.3764	44.333	31.2905	35.563	21.6232	22.5861	30.505	30.4658
Ppp3ca-201	36.4061	34.8822	32.5092	27.2115	19.1629	21.5609	21.1542	22.9718
H2az1-201	41.9778	44.0235	52.4202	44.9428	87.6682	84.1854	128.279	131.804
Adh5-201	36.6754	35.7927	37.0973	30.0177	30.2789	30.3418	36.2696	37.9101
Tspan5-207	27.2951	23.0632	20.1946	23.8041	30.1	26.9563	24.1914	25.7812
Rabggtb-201	26.8429	27.6903	21.9348	27.3317	22.1957	26.431	37.3373	37.9491
Acadm-201	36.5655	38.4583	56.6385	66.9123	59.3405	59.0798	59.9286	58.947
Rps20-201	109.001	123.087	147.16	136.445	88.7868	95.6971	141.19	149.868
Rab2a-201	42.492	48.6445	42.8978	40.3424	69.6193	64.4181	56.8812	59.6416
Plekhf2-201	28.062	25.1938	31.0414	29.0806	31.8631	26.9179	42.6817	38.3495
Gabrr1-201	35.9496	35.285	41.7918	31.9708	36.5115	37.9911	34.0003	32.1003
Pnrc1-201	33.4719	38.0856	26.8301	27.0909	36.5082	31.9502	39.9891	34.3333
Dnaja1-201	32.5211	31.3232	27.6926	24.792	33.4959	35.8845	36.0076	36.5556
Dnaja1-205	46.1494	39.7989	28.7267	23.0573	25.4365	31.1459	37.634	33.3939
Chmp5-201	45.9672	60.3857	38.9861	44.0185	47.1076	42.8116	56.2543	50.674
Dctn3-201	37.3696	36.0525	47.2536	36.2134	40.6557	41.3948	39.0384	37.7903
Vcp-201	124.771	129.667	121.395	121.899	109.832	112.606	92.0627	89.9518
Ccdc107-201	72.4382	62.2829	78.9539	76.594	40.8136	46.8595	60.7483	64.4052
Clta-204	53.0976	43.5177	23.4261	27.8755	20.4472	20.9968	25.2963	22.5454
Clta-205	84.8036	89.8451	59.1863	78.0261	65.8738	57.9427	70.955	66.0496
Tdrd7-201	105.963	106.392	106.432	114.461	98.3717	108.275	105.337	100.031
Anp32b-201	35.1774	38.2998	34.0798	33.5118	27.0957	26.0998	24.8299	23.3981
Alg2-201	36.1861	32.4724	32.7151	30.3703	39.9	38.7125	28.1886	27.4207
Txn1-201	24.6955	22.1219	21.6841	21.2397	24.8296	25.748	26.8414	31.9194
Slc31a2-201	70.0379	77.041	83.969	75.5452	90.2408	87.1956	102.97	91.7855
Atp6v1g1-201	85.4287	76.4582	78.7148	72.2686	96.5297	88.9934	105.917	107.895
Rraga-201	40.1582	41.4073	40.5698	41.5836	52.7375	50.6939	61.0235	55.1813
Rps6-201	495.07	472.647	404.109	475.15	290.379	296.746	353.699	369.09
Klhl9-201	22.8758	24.9805	29.955	27.5796	30.2676	31.0594	42.5566	37.6799
Pgm1-201	34.4115	38.579	40.0778	31.1774	34.7222	31.8071	28.7331	25.7801
Jak1-201	26.9463	33.8805	25.3813	31.3607	34.5957	35.2763	31.9599	29.4519
Dhcr24-201	21.9289	20.2784	21.9261	21.7005	34.6812	34.008	17.7268	19.6868
Slc1a7-203	35.7492	38.9911	41.9296	38.5869	29.3951	28.2029	32.682	34.1771
Scp2-201	28.2401	23.794	19.7408	24.6342	37.5779	40.2867	30.9043	34.5198
Scp2-202	92.5901	85.0005	74.133	74.3546	42.9244	46.3302	64.1377	74.5921
Akr1a1-201	161.505	142.297	118.589	132.758	147.894	139.088	132.058	129.546
Prdx1-204	17.9379	20.7594	23.734	22.4018	23.9702	26.6107	29.0342	32.3569
Rps8-201	399.904	393.075	363.07	354.095	273.457	249.781	375.393	382.713
Slc6a9-202	26.8928	35.2826	22.4911	28.1998	57.1758	49.8436	21.7851	21.8811
Ccdc24-206	31.2655	27.2954	33.0742	29.6506	22.7354	20.6885	32.4175	34.3596
Atp6v0b-201	168.737	156.428	148.959	153.646	135.864	129.642	192.673	186.385
Atp6v0b-206	20.3425	17.6089	16.2589	18.4591	19.2164	18.788	28.2079	37.3761
Slc2a1-201	47.8061	38.2716	37.7433	36.3544	45.8691	46.6528	29.8383	25.929
Ybx1-201	310.286	320.58	233.86	286.022	141.784	130.015	157.5	148.301
Ppt1-201	36.4769	30.9649	30.0515	30.805	32.7931	33.2154	32.2996	28.8226
Gnl2-201	24.2389	26.0754	26.5909	30.8014	21.0962	23.2297	23.2527	21.3242
Psmb2-201	85.7592	78.5878	72.7778	62.868	43.5196	51.5284	60.0947	57.6275
Ncdn-201	33.9222	37.1357	33.581	35.1505	50.1318	46.8735	28.8106	30.5988
Sfpq-201	55.6079	56.2698	63.2952	63.8506	62.0732	61.5103	76.8882	72.3616
Phc2-202	61.9682	50.8463	55.1738	57.5991	52.3698	43.7345	41.3503	46.1823
Hpca-201	34.7759	27.5163	26.7208	24.3052	41.8973	40.0983	24.8694	27.8182
Rbbp4-201	34.2502	29.7801	28.6163	28.1262	36.6331	38.1044	40.798	41.9694
Eif3i-201	61.5973	48.8078	52.5312	53.9078	47.3974	44.6453	60.6644	53.2537
Khdrbs1-201	19.9607	20.3921	19.522	17.6219	33.8812	32.4935	26.2732	23.0938
Pef1-201	27.8651	31.8875	33.7846	33.74	33.7839	31.6491	32.7543	32.4271
Sdc3-201	41.0995	41.1034	41.0847	40.8829	31.5683	32.3545	26.8688	27.5359
Srsf4-202	64.9906	67.772	64.9914	81.7878	59.2333	56.6964	41.7758	39.2073
Epb41-215	72.2898	76.7419	90.8945	104	30.6134	32.6613	46.9812	48.7072
Epb41-203	119.798	104.394	61.0779	79.043	22.8623	27.7268	36.8629	33.7781
Dnajc8-202	61.6971	61.5412	67.2583	51.6068	45.7534	44.9949	57.0654	47.8528
Stx12-201	23.4759	23.0085	20.0097	23.8229	32.7536	33.6758	29.7026	30.2685
Tmem222-201	43.5055	41.2295	35.5397	40.2657	45.4274	44.4574	38.8475	39.872
Wdtc1-201	68.6875	65.9754	59.0975	71.0143	63.7243	61.0159	44.4089	49.1621
Trnp1-202	98.8718	94.021	67.5535	68.6194	75.1932	64.5564	65.817	60.7836
Trnp1-201	54.5617	63.3814	80.4925	77.6947	70.3933	74.8112	53.0752	45.0634
Nudc-201	101.354	98.7585	70.7388	76.1533	71.9219	65.1169	48.3431	50.502
Hmgn2-203	259.393	249.454	272.708	262.797	244.357	232.164	259.788	265.154
E130218I03Rik-208	55.5666	72.013	99.5315	82.4239	81.9935	81.2293	95.5601	86.5024
Stmn1-201	106.756	107.458	102.674	89.2679	129.639	129.626	104.024	100.328
Tmem50a-201	61.529	58.8639	57.8713	44.3325	55.4759	52.4442	52.354	59.5438
Rsrp1-204	86.2717	71.7095	99.7882	108.652	95.3751	100.694	151.681	147.928
Syf2-201	45.6918	52.3279	37.3212	38.3783	31.8456	33.9412	40.7	38.6676
Pnrc2-201	26.4343	30.2362	25.9435	26.507	41.8213	41.8132	50.3843	45.0118
Lypla2-201	49.7781	50.893	39.9508	38.8069	47.8289	42.5101	28.7599	31.0614
Pithd1-201	36.7953	28.3128	24.4047	30.5368	35.4524	34.6749	31.3639	28.1865
Rpl11-201	136.841	169.733	110.868	136.501	46.3698	43.1893	155.207	174.473
Lactbl1-201	45.6131	45.4983	29.4938	29.3779	38.3161	36.1819	33.4245	37.5929
Gm37583-201	49.9941	55.5384	33.4553	33.6751	72.6592	71.486	45.8666	49.1129
Cdc42-201	41.3615	44.8954	28.7697	35.779	48.2017	48.8223	62.8121	51.4074
Alpl-201	97.8739	102.116	104.855	107.583	77.7689	76.3165	76.1648	80.5443
Alpl-205	33.3696	38.2403	41.5699	41.0922	31.6544	31.6039	31.9474	38.0079
Ddost-201	30.9837	32.0353	33.7244	27.7174	23.2999	24.342	21.5613	23.1008
Pink1-201	131.987	109.81	115.508	117.918	127.929	117.872	88.3458	87.1311
Camk2n1-201	44.7147	50.0807	34.4655	35.8797	43.3887	42.0828	37.6136	35.7592
Pla2g5-203	60.3496	59.2183	60.4281	65.0306	49.4192	51.0641	54.7956	62.8563
Sdhb-201	50.6842	47.6386	51.3586	54.5673	42.0749	43.2596	45.8688	52.414
Crocc-204	21.2583	17.8432	27.7145	22.0019	30.318	25.3824	29.3441	35.1397
Crocc-203	39.2626	36.1449	60.9947	52.7788	42.4635	39.4248	59.1945	71.3876
Mfn2-204	41.9897	44.2305	30.7951	35.7727	38.9705	37.4195	26.3036	29.7973
Tardbp-204	38.3491	33.313	36.4459	47.3087	34.2645	36.2482	46.2933	48.4463
Casz1-202	36.1108	37.5874	47.4324	44.6471	23.7918	22.9468	29.9653	30.2345
Kif1b-212	73.0848	71.9605	81.1805	73.9584	55.8169	68.9706	78.0985	71.5797
Clstn1-202	325.236	325.339	340.577	330.682	299.959	293.8	206.231	209.449
Slc25a33-201	45.7443	41.9083	53.8813	42.3602	46.5366	43.2449	46.9275	48.6588
Eno1-202	1662.38	1554.84	1552.29	1671.16	1322.61	1265.49	905.835	929.131
Park7-201	141.491	128.759	128.688	121.772	116.67	109.74	94.9462	118.752
Icmt-201	85.6134	110.546	137.108	132.391	115.092	118.556	122.969	128.677
Rnf207-201	34.5243	40.1529	56.9711	45.8973	37.2059	40.2795	56.4153	60.9498
Rnf207-206	12.7199	14.987	19.1666	19.997	12.9914	15.3274	30.2859	32.1647
Tprgl-201	53.0871	44.2145	35.0425	44.1516	45.05	40.9454	43.8278	41.0017
Pank4-201	28.6185	24.2738	38.8403	35.2692	25.5584	24.6747	34.6078	35.473
Plch2-207	39.5597	34.5471	39.971	34.2825	25.412	24.3991	31.0453	36.1831
Prkcz-201	25.4535	22.7038	30.4285	27.6931	22.5853	22.1215	22.7595	23.5846
Gnb1-209	1431.19	1354.15	1249.3	1400.94	554.479	600.382	852.19	863.362
Gnb1-208	688.452	706.528	801.861	703.913	782.403	752.181	591.765	687.802
Gnb1-206	1164.04	1124.79	1202.87	1134.16	350.965	381.447	596.52	650.62
Ssu72-201	72.6183	74.7488	82.8169	62.7909	51.074	50.9478	67.6327	63.0949
Mrpl20-201	52.6998	44.8473	48.5013	45.5726	31.8527	25.5356	66.035	67.8358
Sdf4-204	65.637	64.2682	48.7333	58.8837	37.3914	37.1192	42.6165	41.9479
Pmpcb-201	39.94	37.9167	28.3285	35.64	28.662	31.6289	31.3113	31.5019
Kmt2e-201	34.5509	30.3237	35.9085	27.6603	22.9043	26.844	22.6863	24.4847
Tomm7-201	32.6884	34.9885	31.5738	32.157	22.0917	21.6303	39.1224	43.814
Agap3-202	34.004	30.5923	33.2328	28.9451	30.0134	26.6665	20.9972	23.0424
Abcf2-201	41.3561	35.4072	33.6263	38.9697	33.0941	34.9083	34.0594	34.9186
Nub1-201	31.5418	35.7019	22.6184	25.8594	26.2293	24.7702	18.4409	15.9348
Rheb-201	33.6377	33.1531	28.9261	26.7546	32.2158	30.1025	37.2031	36.0988
Insig1-201	28.016	26.4294	22.1263	23.1056	32.5601	29.8681	23.5022	22.9382
Mapre3-203	41.7637	36.831	49.5251	45.385	33.8398	39.6875	60.8284	64.0368
Ppp1cb-201	6.19789	5.87523	6.61557	6.57645	32.4456	33.2152	34.5256	29.8888
Ywhah-201	82.9195	92.7827	69.0113	69.0822	105.903	110.537	93.8631	90.2069
Zfyve28-201	18.4657	21.5956	34.6163	31.6059	20.8254	22.2259	25.3477	27.085
Lrpap1-201	33.2405	34.8238	36.9862	35.583	39.1849	40.8153	27.4477	26.5658
Mrfap1-201	157.637	140.74	123.563	114.835	127.621	115.708	115.173	109.668
Crmp1-201	18.5344	23.4758	22.6667	26.1392	29.8264	30.8962	16.3337	16.8344
Fbxl5-201	75.0724	70.2901	69.5397	64.0402	74.3147	79.7856	101.84	108.637
Prom1-206	62.2388	68.8139	99.2298	82.1031	106.228	103.35	116.578	121.706
Tapt1-201	15.2309	19.3179	24.8977	19.1375	27.2668	28.4539	44.0664	36.0323
Rpl9-201	474.185	461.786	493.784	473.339	338.167	320.208	504.781	497.665
Slc30a9-207	25.55	28.4699	24.4041	26.6345	33.1996	29.5239	27.7076	29.1439
Ociad1-201	62.5002	73.317	61.7959	61.4091	58.6789	62.6713	77.3579	68.9257
Polr2b-201	35.4167	39.2152	36.6774	32.2878	30.4544	32.3901	32.3631	30.1178
Igfbp7-201	17.0058	21.7929	33.7636	40.8015	6.3098	7.04895	2.88442	3.31373
Rufy3-205	53.7724	57.1298	65.1585	62.0511	44.9539	45.8886	49.3247	47.0035
Rufy3-201	37.702	35.5865	33.0133	32.4852	45.422	48.2087	44.4197	41.0482
G3bp2-201	33.0817	36.0519	33.6757	28.0018	36.2764	35.1634	39.9421	35.435
Scarb2-201	29.0455	31.2673	25.6825	26.9961	32.1818	30.6985	27.3453	23.9637
Ccni-201	59.2705	66.0432	64.1295	52.0361	71.2402	63.928	53.4763	51.9825
Hnrnpd-210	36.0973	46.6434	40.6937	43.477	25.4161	26.1689	30.629	29.7907
Hnrnpdl-202	36.3932	33.9049	27.8175	31.1543	36.312	36.0554	37.473	39.5268
Hnrnpdl-207	18.3545	24.3338	21.3782	21.8451	37.2083	40.3383	62.5708	53.2754
Tmem150c-201	43.9971	43.8615	43.6935	40.5141	34.2833	37.0714	29.6244	30.4237
Cops4-201	27.5907	28.3843	31.25	34.1076	30.0929	29.4644	36.4172	43.0469
Cds1-201	100.226	112.577	107.872	115.561	97.4853	97.698	98.948	93.0993
Arhgap24-204	31.3353	28.9287	26.9155	32.5918	24.5957	25.327	27.0241	24.3365
Aff1-202	36.8177	32.7008	38.5669	40.9283	35.4225	35.5509	31.9957	34.8351
Nudt9-201	30.9124	23.7803	23.8331	22.7313	14.3362	16.847	15.0646	17.5391
Sparcl1-201	97.3524	109.773	69.5837	79.0524	98.3754	101.277	65.4219	66.3491
Rpl5-201	72.0461	64.4258	52.2195	47.2423	38.2318	33.236	38.4364	44.7443
Pde6b-201	912.529	919.972	1007.78	1109.97	639.718	659.047	830.364	810.103
Pde6b-203	67.8872	58.932	95.3702	91.5512	72.8279	74.9459	129.511	129.452
Pde6b-202	48.9875	42.2465	65.6478	61.4538	36.1808	35.1055	53.0809	51.5797
Cplx1-201	56.2599	53.4794	48.7065	50.8933	65.0471	67.945	40.3196	43.4662
Dynll1-202	71.2881	54.8339	79.7531	78.2384	52.4167	47.0487	87.1892	96.0947
Gatc-201	31.519	32.2322	28.7169	28.6557	25.5286	22.9389	21.5611	24.0485
Cox6a1-201	186.377	169.927	161.64	159.216	175.735	145.484	164.615	176.996
Msi1-208	123.662	110.779	137.774	134.476	105.538	97.2218	83.9524	91.9009
Rplp0-201	130.131	130.697	156.144	118.185	135.277	123.657	142.311	155.301
Bicdl1-201	92.4748	84.9897	110.36	105.473	82.2691	76.6385	64.891	62.3279
Bicdl1-207	111.067	101.13	112.035	105.249	55.8923	55.4542	53.4242	51.4892
Pebp1-201	222.998	213.694	204.873	202.284	234.669	227.033	193.424	215.582
Wsb2-201	11.8441	13.3733	20.9162	21.4858	31.8664	29.4606	19.0982	19.5959
Rph3a-201	69.1951	60.8282	48.7393	51.321	49.9809	54.9969	36.7807	35.9246
Rpl6-201	184.445	208.927	179.583	191.084	166.666	163.527	207.519	207.993
Trafd1-208	24.6617	21.02	21.5128	23.1802	28.3156	25.9924	35.1203	31.6674
Erp29-201	46.6981	42.5422	26.8729	33.0057	28.3093	23.5368	27.1009	28.0852
Mapkapk5-205	27.7726	34.1483	18.4197	20.1607	18.3744	16.8897	13.6264	15.0634
Atp2a2-203	24.1222	28.0995	25.0509	22.4353	53.2741	52.2408	36.0201	37.43
Ubc-202	111.877	125.618	94.2366	100.763	100.786	109.416	87.5678	90.3241
Ran-201	57.929	56.7358	57.2871	60.7019	73.0592	73.2056	73.2518	71.4332
Nipsnap2-201	27.5459	21.2929	23.9225	21.4609	34.5674	32.9763	21.5599	23.5385
Cct6a-202	50.9314	43.9852	38.0044	42.5215	44.3506	51.1619	58.7422	55.4353
Chchd2-201	148.098	183.832	152.3	131.525	190.473	170.687	234.558	244.521
Eif4h-201	42.2128	46.9805	70.4228	60.5608	74.3304	71.1663	58.2061	50.152
Bcl7b-201	26.1647	30.25	21.0779	26.4961	25.3292	26.6099	17.3119	18.2712
Baz1b-201	34.798	30.2137	34.0717	34.6993	30.3391	31.3922	30.9857	30.0202
Mdh2-201	141.716	156.288	115.735	146.818	127.879	119.008	116.693	117.852
Ywhag-201	84.4517	79.9715	71.2994	66.7293	98.8185	91.4793	64.9789	64.9273
Polr2j-201	63.9735	61.2477	50.2346	52.6831	35.4267	32.9603	41.4042	51.9308
Prkar1b-201	54.7509	54.6608	39.3972	48.6505	61.9681	61.3738	46.6534	46.9403
Elfn1-201	36.3964	34.3418	39.3025	44.5431	28.2398	28.4118	21.6424	25.519
Actb-201	135.059	164.062	130.893	138.701	162.074	152.197	103.124	110.201
Tecpr1-201	31.1594	26.1326	30.2864	32.3643	24.966	25.8215	21.1254	22.7835
Tmem130-201	34.6517	28.7927	35.518	37.1447	43.6002	44.9468	27.751	30.2856
Arpc1a-201	41.9149	38.9589	39.8736	34.9164	42.1327	38.6904	30.1962	28.7136
Atp5j2-201	109.596	94.4206	98.2998	77.4495	41.6138	43.1208	65.4642	83.1589
Wasf3-201	54.5487	50.0353	50.8827	53.1336	49.366	53.2718	40.8769	44.0965
Rpl21-201	73.3939	57.9374	58.517	64.4185	32.1936	26.0525	57.9284	54.2536
Rpl21-202	234.65	201.907	256.538	234.235	141.913	141.99	196.09	195.102
Pomp-201	26.7345	26.8982	27.7866	29.8308	29.7089	27.7001	36.4732	35.8002
Pomp-203	54.8006	50.3215	52.5296	48.047	32.1751	29.0291	45.2328	50.6233
Hmgb1-210	95.546	95.3496	59.5708	78.3032	47.0155	53.1332	45.5404	47.5087
Gngt1-201	1505.86	1515.17	1268.19	1600.97	680.329	678.893	1618.98	1555.26
Sem1-201	46.2701	39.0024	22.5864	28.1281	17.6578	14.6074	24.4528	26.3075
Ndufa4-205	147.807	123.623	134.442	130.353	197.603	193.957	246.775	224.919
Ndufa4-204	175.407	152.736	221.799	202.637	187.407	164.526	339.641	381.968
Capza2-201	28.3613	29.302	16.3308	18.2779	40.3281	38.7802	46.1161	42.7724
Fam3c-205	58.2442	55.4796	42.1319	50.6505	50.6415	49.4378	55.566	55.4476
Fam3c-201	41.8274	49.0327	73.6496	70.771	45.3358	51.4214	47.192	42.918
Fam3c-204	50.0158	42.3098	60.4335	58.1882	27.9148	28.144	43.7684	42.5268
Impdh1-202	151.468	121.134	78.6261	104.074	71.214	63.9415	62.692	58.7026
Impdh1-209	167.905	179.465	128.965	164.738	129.507	116.59	78.1156	96.0086
Opn1sw-201	79.6074	81.4524	120.67	102.8	43.4415	56.4482	152.73	150.534
Atp6v1f-201	82.8393	62.4465	64.513	68.713	66.287	57.144	70.9324	87.775
Ube2h-202	26.5717	29.2653	27.19	30.3882	30.9086	31.0814	23.0742	24.4923
Podxl-201	34.0734	42.8163	45.9291	46.3693	25.2968	27.1824	31.935	32.0871
Bpgm-201	37.3646	43.9592	39.015	34.8523	27.1948	25.8441	26.1529	28.4856
Ptn-201	31.1	29.2844	18.6274	24.6169	43.0517	45.0357	36.335	31.4233
Fmc1-201	47.2736	53.2224	38.0863	40.6004	25.078	26.0579	41.9101	52.4995
Cul1-201	36.0797	32.986	36.2105	34.8468	36.1345	41.743	42.382	38.1228
Pdia4-201	32.6297	35.387	35.9381	35.2373	29.8708	28.113	26.2752	25.215
Atp6v0e2-201	202.518	182.288	218.405	204.204	191.829	192.891	176.27	179.103
Tra2a-201	40.0945	53.0844	32.0021	41.2648	49.6765	44.544	54.0705	65.3698
Ccdc126-201	71.5963	70.5275	88.1864	80.6302	94.0849	104.085	98.8073	100.852
Hnrnpa2b1-211	20.5066	20.8017	20.1512	15.3404	81.298	80.4549	103.195	86.1808
Hnrnpa2b1-204	188.63	177.397	149.299	157.154	160.39	157.397	189.089	192.389
Cbx3-201	56.0243	59.7054	55.5692	56.8172	48.0772	38.646	64.8482	65.8911
Tax1bp1-201	106.727	117.418	118.337	111.002	103.776	101.472	109.875	102.042
Scrn1-201	41.4598	44.7436	40.5392	40.5294	41.1852	40.4289	31.4175	31.83
Aqp1-201	46.5871	46.4454	70.2893	77.1938	67.4073	63.0049	71.3827	70.789
Vopp1-201	168.558	188.071	165.183	156.477	173.017	169.963	159.101	152.5
Herc3-202	85.5289	82.3058	96.0429	88.3683	92.348	95.732	104.659	96.0014
Nap1l5-201	88.3637	93.0432	50.6688	58.8558	127.647	117.8	103.407	94.0002
Rnf181-201	51.5779	59.8761	67.5732	66.9703	64.776	66.9267	69.7515	63.2933
Suclg1-201	58.3444	47.4291	30.6426	40.2327	34.0184	31.7634	41.8439	39.3706
Hk2-201	93.5585	94.4552	121.5	121.607	58.9811	65.8097	74.2397	74.7368
Mrpl53-201	28.5831	24.4298	27.5578	22.7167	17.433	16.752	29.8954	35.4229
Dctn1-203	76.7476	71.6	83.9728	80.7346	71.3666	71.8572	50.9217	50.4445
Vax2os-201	18.9111	15.2073	24.0401	22.7329	15.5874	20.2467	43.1106	41.1966
Vax2-201	29.609	35.0177	29.3774	33.6737	18.5098	15.6235	27.8972	29.6054
Tex261-201	25.1431	24.6221	32.0161	29.9234	27.0687	26.7845	26.9101	28.3627
Dusp11-201	17.0432	15.3952	23.3072	19.0997	24.8468	25.4275	34.4253	33.9395
Pcbp1-201	88.8136	95.6496	77.7958	90.7874	87.5408	79.1534	71.3525	77.2247
Snrnp27-201	59.3233	54.9048	55.1632	51.3924	33.3482	31.7628	58.0646	59.4565
Copg1-202	47.5411	40.8266	44.423	40.4085	47.6753	47.3011	35.2014	32.617
Rab7-205	94.4487	103.793	52.4368	60.826	86.5756	93.3744	80.7567	71.5253
Rpn1-201	31.9456	40.742	41.7838	37.3705	26.7938	26.6768	25.5827	25.6808
Hdac11-201	44.1249	48.431	35.4964	36.1003	38.0183	39.1009	30.1573	34.6892
Slc6a6-201	358.885	359.448	332.949	343.342	216.133	224.969	248.908	245.764
Arl6ip5-201	67.364	68.3128	58.4094	57.6078	48.0432	48.7345	56.3764	55.3949
Frmd4b-204	39.7581	38.3675	49.7667	38.5631	28.1527	24.0871	26.4331	24.3012
Emc3-201	33.8653	31.6454	17.7513	21.4908	24.6758	24.3066	23.3815	23.0218
Brk1-201	31.1542	40.7897	46.4005	38.0988	50.5954	46.7448	43.7754	52.2031
Sec13-201	26.2623	31.6927	28.3114	29.7133	23.0377	24.9623	32.4432	32.2136
Slc6a11-201	46.9606	45.8045	41.8957	39.4872	49.0458	48.2811	33.3715	37.4748
Slc6a1-201	82.1014	77.417	62.5267	63.0574	117.372	111.983	58.3643	61.6968
Rho-201	5993.23	6101.7	6407.39	6126.25	5067.85	5096.81	3977.96	3953.56
Rho-204	5936.01	5057.2	5892.31	5799.23	4804.32	5543.11	5579.66	6227.25
Rho-206	6448.95	5662.8	5317.96	5703.91	4445.83	4394.03	4456.12	4928.36
Cacna2d4-211	36.9938	36.4809	37.9702	42.8912	32.9956	35.1375	36.0263	36.8256
Cacna2d4-201	36.9938	36.4809	37.9702	42.8912	32.9956	35.1375	36.0263	36.8256
Cacna2d4-208	35.3636	43.7484	32.7153	34.8185	26.3507	28.3988	40.0476	38.7518
Atp6v1e1-201	118.922	125.641	88.8014	106.948	122.103	126.793	131.821	123.056
M6pr-201	36.0144	36.1268	37.1052	35.8778	35.2869	33.0721	30.7183	32.8745
Necap1-201	55.1591	65.1342	61.2629	52.194	63.6136	65.1951	56.2583	53.8118
Clstn3-201	22.079	21.6702	22.484	28.8743	26.5724	30.2854	20.4569	23.8882
Eno2-201	167.49	134.847	143.109	137.027	139.271	128.643	99.1095	118.949
Eno2-203	29.1224	27.2436	50.8324	51.6488	39.7425	46.7808	54.7918	51.1125
Tpi1-207	485.428	466.272	433.541	505.739	424.957	425.974	391.268	383.309
Gnb3-201	146.558	135.781	149.656	150.775	93.4575	77.7856	99.3637	118.053
Ptms-201	184.058	157.221	85.0762	109.562	73.9936	57.2367	48.7984	54.6695
Mlf2-202	211.88	215.805	187.452	189.053	163.02	136.319	133.84	144.236
Cops7a-201	45.1638	49.9488	33.3115	33.6631	39.2677	37.6374	34.3692	33.4951
Gapdh-203	2503.52	2279.16	2425.04	2600.08	1442.7	1494.88	1690.09	1796.31
Ndufa9-203	47.5438	52.5397	41.7299	33.8272	38.6988	39.9229	49.9408	49.6496
Fkbp4-201	101.738	107.839	87.5949	91.4932	93.1388	90.7897	78.8288	79.3766
Gabarapl1-201	153.784	162.458	142.394	141.554	132.402	131.687	137.379	139.159
Ybx3-201	121.436	122.116	105.262	124.249	98.7489	96.5109	124.73	131.178
Etnk1-201	31.7718	35.1512	36.2748	34.4812	58.3855	58.0285	48.0649	44.3141
Bcat1-203	23.5936	27.0894	28.283	23.7257	31.9254	30.7361	29.9049	30.0736
Rps4l-201	59.2483	49.0406	36.8841	44.4062	32.8345	34.592	38.046	45.5473
Cacng7-201	69.4667	67.8599	51.797	52.9875	48.36	46.2324	37.1221	39.5511
Ndufa3-201	70.4883	58.6104	58.9296	55.4253	26.5423	21.996	64.3235	57.8569
Rps9-201	305.061	266.817	250.186	269.049	190.287	176.955	217.666	252.193
Leng8-201	72.6268	58.6077	69.8248	77.6445	96.3944	96.4849	122.489	125.727
Ppp6r1-201	36.6495	38.2865	34.3028	38.6606	33.4637	31.3959	31.5976	33.0497
Rpl28-201	139.789	120.783	151.948	136.605	27.0591	27.0282	73.6622	92.5725
U2af2-201	53.625	48.8617	58.2387	61.2829	46.6306	43.8676	41.6637	50.3135
Epn1-202	36.1652	32.5006	23.2428	25.5991	27.4936	29.4014	19.9199	19.608
Epn1-207	39.1929	40.2479	39.6521	37.5559	36.3684	33.2861	20.8575	27.7192
Zfp444-203	34.7275	28.6493	17.4154	21.6981	23.878	21.4486	18.6805	18.3367
Rps5-201	208.445	215.539	194.696	218.044	137.71	138.243	214.422	238.396
Chmp2a-201	92.4535	86.1784	84.6205	86.7635	70.4916	69.5203	75.9193	69.5869
Cabp5-201	42.7867	38.9935	29.9036	30.4492	37.7623	39.311	37.0532	34.8734
Crx-201	435.695	451.251	482.641	442.674	322.124	328.535	336.849	349.035
Selenow-201	407.675	330.031	201.695	258.693	183.05	161.75	192.759	204.43
Nop53-203	94.2309	88.7281	65.0746	75.8846	70.0331	63.6539	48.954	42.7726
Napa-201	62.6933	62.797	62.6132	63.6812	65.087	66.8002	58.016	57.9937
Ap2s1-201	80.0563	71.9065	67.9139	71.9766	85.9655	75.6551	60.6979	75.6434
Calm3-201	229.572	249.414	161.614	197.174	184.635	175.654	151.661	158.33
Pnmal2-201	44.5524	42.1593	41.5523	37.7686	50.2668	48.1571	27.0127	30.6128
Ppp5c-201	31.4162	35.7057	35.7674	32.0937	33.3855	33.2585	26.8628	25.9817
Dmwd-204	28.1402	32.4307	30.1378	25.0082	21.9059	23.499	22.0604	23.8499
Snrpd2-201	22.8164	27.8634	24.4141	26.7283	23.5551	22.3811	29.5111	33.5956
Ppm1n-201	37.8487	41.0867	52.1773	50.9778	27.711	23.4853	50.2883	47.605
Ppm1n-204	28.4694	25.0064	20.9232	25.7063	17.6769	16.5683	31.836	32.8423
Rtn2-201	31.8194	31.5659	33.2715	26.6646	26.3311	22.3481	23.6463	23.2825
Klc3-203	49.0042	37.4782	35.4153	36.6781	33.6284	40.1027	26.6151	26.5166
Ppp1r37-201	36.3785	33.9914	37.5014	31.1807	26.4586	27.5414	23.9417	24.1308
Clptm1-208	53.0146	50.8066	42.6567	51.3867	31.6631	33.8262	28.3879	31.1507
Apoe-202	313.644	293.036	330.692	280.278	245.659	225.481	128.712	144.993
Tomm40-202	27.2558	33.3663	32.5068	29.7029	19.3058	21.0841	17.9628	20.3348
Rps19-210	94.8518	72.6291	88.7247	85.1248	64.3183	76.9684	105.827	110.095
Rabac1-201	90.3613	88.0789	88.4418	87.2858	95.607	77.8204	107.876	111.008
Atp1a3-201	868.181	896.998	819.564	902.507	682.988	708.061	409.418	415.464
Gsk3a-201	63.2824	69.1484	52.8847	65.0705	61.354	57.7814	45.8121	48.5525
Hnrnpul1-205	33.0301	34.8717	28.837	29.6484	24.6025	24.4481	21.8241	21.2494
Hnrnpul1-201	26.2827	26.6641	29.6195	33.6677	18.6177	18.6385	17.6071	18.5552
Pld3-201	53.9412	45.2449	47.5932	44.6726	55.4532	51.8466	33.2648	33.754
Psmc4-201	75.3406	78.0386	58.0169	63.0972	49.3325	49.7491	52.3497	51.4729
Rps16-203	260.118	282.102	256.187	240.905	103.155	101.244	194.791	203.978
Hnrnpl-206	37.4228	41.6637	51.262	57.5867	35.2315	38.4053	56.418	59.0074
Hnrnpl-202	23.456	26.1114	30.1831	24.5692	47.0853	53.9363	26.8894	35.712
Hnrnpl-209	82.2839	68.2713	57.5628	63.8133	44.3671	38.2987	51.6546	47.2807
Eif3k-201	112.593	94.5304	86.1304	93.885	68.6353	74.5331	92.4796	98.9716
Psmd8-202	99.289	93.9834	95.1164	94.4845	72.6597	67.7891	77.588	80.7457
Clip3-201	78.8305	77.9948	86.9887	82.4573	88.4297	93.4142	42.2463	43.449
Aplp1-201	100.153	107.066	77.184	95.0963	119.201	109.634	73.1407	77.2275
Psenen-201	60.96	63.3738	46.2369	45.1898	43.5867	41.4813	50.509	62.6054
Tmem147-201	30.1051	29.5374	45.6623	38.638	37.8511	32.5516	40.0948	38.7423
Uba2-201	43.7633	40.3903	50.1778	41.2308	40.5547	41.8089	42.5511	40.8877
Gpi1-201	226.016	219.047	257.305	279.066	261.114	255.747	153.259	152.428
Gpi1-203	30.0333	22.7248	33.6906	33.4942	46.8023	43.7938	48.6173	54.5169
Gpi1-207	225.149	182.799	212.59	235.953	136.075	102.415	89.0773	91.0517
Lsm14a-203	35.4464	31.8669	34.0076	36.244	16.54	16.8744	21.9478	27.5158
Rgs9bp-201	161.695	160.768	172.827	166.434	138.519	144.79	154.463	152.262
Ap2a1-203	19.3534	24.4218	27.0899	34.4835	32.6368	36.5847	26.3026	32.0291
Nosip-201	41.2622	36.7366	22.3071	28.0125	24.8326	21.9722	20.4556	23.2407
Rps11-201	286.223	305.383	283.734	313.592	173.114	171.217	269.705	275.101
Rpl13a-214	260.657	276.694	212.429	252.119	161.588	184.161	261.042	329.069
Slc17a7-201	542.511	591.8	589.21	557.469	370.453	361.334	281.595	292.896
Slc17a7-202	289.448	293.066	382.125	309.567	217.131	225.284	198.364	239.214
Snrnp70-212	72.6639	58.7174	73.0577	79.4295	31.0665	35.5267	69.7611	63.8225
Ftl1-201	310.029	286.908	237.371	253.183	281.781	264.496	197.47	222.455
Dbp-201	83.4543	70.9157	39.1983	46.046	45.4357	35.8573	28.7381	31.0885
Rpl18-201	170.925	157.692	164.388	177.008	146.716	141.19	182.392	196.694
Cyth2-203	43.6383	40.3985	40.0687	49.0629	15.0675	18.7994	19.935	25.9959
Cyth2-209	31.1276	35.6234	32.2743	33.929	31.3751	28.4796	20.1552	23.0039
Kcnj14-201	274.907	256.001	350.642	342.628	212.672	224.291	225.247	239.086
Nomo1-201	40.2763	41.9922	41.1728	37.4066	33.302	32.7945	24.4037	24.6591
Ldha-202	782.224	783.108	782.597	831.418	634.503	614.535	673.178	677.479
Tsg101-206	39.5398	36.0326	28.0931	37.2756	19.7684	18.5643	24.4173	21.6397
Snrpn-201	117.328	134.514	105.223	103.204	120.653	114.281	96.001	103.254
Ndn-201	33.5627	37.3225	30.4319	31.1067	41.0688	38.6446	27.6635	26.2436
Mfge8-202	186.908	169.517	220.567	203.698	157.344	144.744	132.124	143.31
Unc45a-201	23.758	22.8034	31.5196	27.0533	25.5076	23.5838	20.6103	22.8499
Man2a2-201	93.3932	75.4304	100.251	94.5542	52.7729	61.9024	59.7421	61.9874
Rps17-201	381.067	407.381	338.006	398.861	253.856	243.112	405.428	437.401
Btbd1-201	40.0917	45.5333	41.8719	39.4222	43.4096	44.2481	47.7816	44.662
Crebzf-201	26.8119	20.2076	25.8744	26.4334	23.1894	20.1637	35.9383	32.8625
Ndufc2-201	49.0815	61.0651	50.3424	38.4243	79.1445	76.1707	95.2037	109.141
Rps3-201	148.303	150.53	109.496	136.861	80	75.148	118.528	128.449
Spcs2-207	24.1745	26.2651	26.2024	23.4294	32.0067	38.3623	34.5211	37.0119
Ppme1-201	47.5415	46.5726	43.4858	50.2982	42.9611	44.6873	42.1432	43.4726
Rab6a-201	43.3028	54.382	42.2975	36.3867	46.6223	44.416	48.0567	41.1432
Plekhb1-211	52.0559	52.9461	61.4426	51.8321	29.5082	27.8732	26.9839	25.4285
Fam168a-202	29.4967	28.0876	33.2207	32.8009	22.4196	24.8921	22.2456	22.6439
Smpd1-201	62.334	52.3823	65.8338	61.3383	45.7239	41.6161	43.8957	41.7255
Apbb1-219	59.3646	66.2264	70.8192	67.7676	57.8984	57.2402	58.1577	62.7679
Tpp1-201	25.0084	32.9596	17.0115	19.9534	30.9384	29.627	21.9766	18.7237
Eif3f-201	57.1474	54.5972	54.9113	45.728	48.4822	41.68	34.3157	31.3115
Tub-201	66.8423	62.2949	80.8473	86.1369	64.5988	64.3112	84.7708	87.8832
Tub-203	14.5631	16.3814	18.64	24.7745	14.2787	13.7605	31.105	31.7548
Rpl27a-203	176.245	180.216	126.721	133.36	73.1503	71.2842	117.914	128.517
Dennd5a-202	48.0936	40.1961	35.0676	35.268	35.6117	34.1933	24.4487	27.3605
Ipo7-201	22.5916	22.4266	25.6661	21.9958	29.8294	31.2044	33.7305	31.767
Eif4g2-213	46.0338	43.0409	47.478	42.784	51.9912	53.8676	43.9817	40.5793
Eif4g2-206	119.579	129.264	152.318	131.182	197.391	215.896	186.371	171.311
Eif4g2-210	99.535	81.9365	71.2069	71.9422	3.2235	3.94522	19.2055	15.8971
Usp47-201	21.8349	25.0978	22.1484	21.8739	29.0104	30.9742	27.8059	25.2613
Dkk3-201	212.783	187.16	201.868	188.212	255.789	250.464	133.312	139.806
Arntl-206	30.8092	26.3627	28.7393	32.377	17.1891	16.8996	16.8172	17.8603
Far1-201	13.3449	10.2036	11.2818	12.9695	24.1044	24.7952	32.9675	28.0548
Psma1-201	38.0041	48.4399	39.6552	30.3833	40.1804	45.7631	61.4515	53.7981
1110004F10Rik-201	46.2909	56.434	36.5052	40.0483	47.0514	42.9766	45.7061	40.4354
Rps13-201	218.925	211.739	164.323	184.262	156.475	147.271	184.824	206.837
Arl6ip1-201	84.9126	80.3205	84.32	78.4778	125.163	120.783	103.684	96.1215
Gde1-201	67.3821	51.9862	63.1915	58.9537	60.9417	58.0798	56.6408	53.5984
Uqcrc2-201	45.1217	56.6882	65.166	53.988	64.8857	66.8829	81.5558	72.3352
Cdr2-201	127.963	125.196	105.158	115.282	91.2514	94.2126	99.7634	92.9186
Dctn5-201	43.3774	36.1436	35.2423	33.8854	32.2426	27.2491	35.3763	33.4155
D430042O09Rik-207	32.8178	31.3111	37.1145	32.9285	27.8374	27.87	31.7881	34.6522
Sbk1-201	32.7485	31.6172	26.57	28.4866	30.2676	27.8239	19.3003	19.4273
Tufm-201	30.7763	26.7842	26.1993	26.7152	26.891	25.5505	18.9282	20.9874
Eif3c-201	66.061	66.2395	56.7993	56.7135	52.4968	50.6614	45.2927	46.1777
Aldoa-201	1541.77	1369.3	2196.02	2135.18	1475.13	1438.59	1168.27	1207.37
Fam57b-201	490.786	462.279	403.347	427.457	313.779	310.79	226.216	270.46
Stx1b-201	46.5058	51.0096	35.3201	36.339	43.399	43.7266	30.167	29.9209
Fus-201	73.8148	60.9005	48.7627	53.135	50.2788	42.5053	33.3073	38.5191
Nsmce4a-202	45.2383	49.6725	40.08	39.1633	31.6799	33.038	42.8251	35.3061
Ctbp2-214	50.2315	39.9663	51.7236	42.3856	26.837	29.7145	30.7416	34.3456
Glrx3-201	32.8421	38.2479	19.0904	24.4483	22.5547	23.7788	35.2902	31.949
Drd4-201	52.8071	53.337	56.8735	57.5829	36.2202	29.8289	39.3739	40.071
Taldo1-201	100.254	78.8661	96.3708	83.671	72.5475	71.0066	70.576	66.3281
Slc25a22-203	47.5352	43.6775	40.5598	47.72	55.7228	47.8713	44.275	48.037
Rplp2-203	154.197	195.229	118.121	141.934	99.6194	95.1718	118.306	113.943
Ap2a2-201	95.8106	95.9822	105.507	108.169	108.86	108.568	89.9077	95.2561
Dusp8-201	39.5793	38.5269	28.2745	31.2104	28.2599	25.8291	19.8463	19.7509
Ctsd-202	194.547	193.833	166.891	161.923	146.642	142.662	128.695	131.393
Cd81-201	93.2931	89.0362	73.145	78.6052	90.9906	83.8149	75.2116	77.5741
Nap1l4-206	32.689	41.5526	35.1212	32.4918	39.7442	34.2663	28.059	29.3502
Syne1-202	40.9035	32.4611	51.7653	47.8447	38.6188	42.9241	40.3386	41.4756
Lrp11-201	20.5865	18.0096	19.957	20.1641	30.0634	23.3567	23.9572	23.4819
Pcmt1-202	14.7392	11.36	14.8527	13.8933	25.6497	30.9486	28.2417	24.1141
Cited2-201	80.7226	75.2311	55.4544	64.0338	69.0192	69.8019	58.8825	65.9912
Ahi1-201	26.935	25.4988	38.9781	31.4576	26.9188	30.2924	21.5361	23.4475
Sgk1-201	99.0597	87.4213	163.626	168.287	226.337	208.282	258.751	254.558
Rps12-203	378.427	293.263	282.023	289.232	209.061	200.437	277.204	316.62
Epb41l2-204	183.9	204.188	161.238	195.167	165.156	165.516	170.055	167.829
Tspyl1-201	30.2511	31.9372	33.4073	31.7465	37.1469	37.2513	36.319	35.42
Tspyl4-201	91.4659	97.1239	92.0842	88.5728	108.147	112.676	121.325	115.358
Amd1-201	19.7261	21.0537	26.1814	24.7686	32.4175	32.7367	39.4568	35.8963
Amd1-205	19.7261	21.0537	26.1814	24.7686	32.4175	32.7367	39.4568	35.8963
Sesn1-201	26.6508	27.6507	32.198	29.095	33.2969	31.3051	32.1677	33.2425
Snx3-201	66.2548	67.4733	73.5866	55.6741	43.4621	44.2463	47.7495	45.9296
Gpx4-ps2-202	39.8437	36.1213	28.2711	35.5654	28.8683	26.9598	38.0953	43.5749
Serinc1-201	97.368	104.24	102.26	98.0221	143.862	151.687	158.553	151.227
Ranbp2-201	21.205	21.0412	26.4171	24.1478	24.9187	28.8967	34.5817	31.6993
Ddit4-201	56.3941	55.926	59.1321	58.4148	76.1174	67.3556	63.7967	68.0924
Anapc16-204	18.1966	16.4084	25.6853	29.2725	22.2543	22.3709	32.2976	34.0887
Spock2-201	75.1396	72.4897	63.3321	67.6186	77.4587	78.456	50.5272	51.6906
Psap-205	194.235	233.002	201.535	199.099	237.159	223.672	170.582	163.442
Ppa1-201	79.1917	89.7508	80.4993	94.5918	70.8334	74.2831	89.379	88.6186
Sar1a-201	60.0732	49.8749	50.0686	50.5178	55.6415	54.7924	51.1584	46.4009
Hk1-202	31.6759	39.2832	50.0708	50.6531	58.0712	49.1587	37.2398	35.85
Hk1-201	227.864	211.024	175.949	193.929	130.675	120.943	82.717	107.345
Hk1-212	113.033	106.584	78.2086	93.3543	55.2447	59.1168	65.0597	66.7455
Kifbp-201	49.293	44.7375	36.6701	38.807	37.2413	36.5751	33.8096	35.7545
Zfp365-203	24.0931	23.6103	38.9121	30.416	42.7686	44.4719	34.945	32.6077
Phyhipl-206	44.1118	36.5849	40.964	38.0886	35.5718	38.6861	33.9384	32.6931
Cisd1-201	58.3048	62.1347	51.59	58.4998	67.4445	58.7336	67.9222	71.7401
Ipmk-201	32.4758	34.2317	35.9966	40.3006	43.6882	45.4831	37.4246	35.314
Zwint-201	142.101	187.184	150.418	132.064	192.994	195.536	224.026	226.07
Mif-201	298.658	281.46	298.582	300.985	375.387	343.972	226.041	265.414
Smarcb1-201	36.8271	28.0429	36.3251	42.3581	26.6373	30.8978	21.7539	21.3549
Pcbp3-207	64.7763	71.0471	82.4666	63.24	85.8385	83.0769	52.7288	59.5559
Sumo3-202	33.789	33.8191	34.0876	32.9181	45.699	44.1046	45.4416	44.1193
Pfkl-201	125.046	125.745	153.525	150.36	108.58	103.848	74.6737	77.7442
Agpat3-201	184.981	191.577	239.43	209.909	180.823	180.783	154.227	153.747
Agpat3-211	127.117	120.566	152.865	154.251	115.841	120.504	140.286	142.115
Agpat3-202	195.968	189.419	173.047	208.637	47.5283	60.0159	114.253	94.8216
Agpat3-210	127.502	120.96	155.349	133.387	124.587	153.56	138.353	157.746
Rrp1-201	106.624	98.0679	81.2676	84.1356	76.0482	79.4593	57.7016	57.2506
Bsg-205	223.41	228.209	147.603	175.16	245.789	216.847	162.355	163.519
Bsg-201	236.608	215.342	263.159	264.03	227.332	213.213	193.456	228.631
R3hdm4-201	40.5263	43.7608	57.7911	45.1996	42.1204	39.2917	38.4839	38.1614
Polr2e-201	42.8486	39.4395	33.8621	40.3473	37.886	34.1709	32.1188	30.9251
Gpx4-202	417.744	330.433	341.471	380.995	273.303	259.322	474.324	542.461
Gpx4-207	213.325	236.761	280.994	281.379	123.984	106.601	163.559	162.732
Atp5d-201	143.521	120.485	123.189	116.461	106.892	83.5952	81.4105	95.9004
Cirbp-202	96.002	117.992	76.193	85.9567	133.971	122.198	98.5798	102.901
Ndufs7-201	73.2406	62.0186	69.1292	54.0027	66.3954	54.6582	66.3261	73.4607
Rps15-202	608.493	526.595	596.859	542.65	390.195	348.02	491.983	568.454
Reep6-207	920.439	958.406	793.094	846.47	520.242	520.225	334.842	362.576
Plk5-202	77.4791	72.3531	93.8825	85.2387	73.0309	67.628	83.4436	87.9248
Abhd17a-201	35.9248	41.262	32.1717	36.5735	37.2459	29.3659	30.4599	34.9443
Ap3d1-201	39.1774	36.3117	32.704	41.3549	43.8142	41.2568	32.3272	34.4579
Oaz1-207	360.004	290.001	342.195	287.281	310.367	282.214	272.624	292.692
Diras1-201	37.7401	31.977	31.5631	26.8916	31.2804	29.481	19.7008	23.4006
Eef2-201	483.491	467.715	420.718	441.684	402.621	392.423	264.918	285.462
Pip5k1c-208	34.9766	29.481	22.5436	24.2362	24.3687	18.7213	14.7212	14.1816
Gm48551-202	43.6191	49.885	37.339	37.4692	45.0034	48.6257	61.2575	64.3701
Tle5-201	227.734	214.066	191.161	212.115	192.505	182.941	146.174	129.062
Ric8b-202	27.8237	30.0945	27.9573	28.2329	26.6274	20.2637	22.8356	22.7012
Rtcb-201	50.5002	57.0781	42.0942	48.6614	45.7209	45.0566	43.3203	47.4658
Timp3-201	32.5163	33.214	19.7025	22.4303	23.619	21.8129	15.3942	15.82
Hsp90b1-201	153.196	161.931	168.326	192.644	114.222	116.584	176.867	160.305
Arl1-202	46.3887	43.9028	26.6951	33.4532	46.4504	45.0314	54.4194	53.6685
Mrpl42-203	52.9512	50.4472	49.8685	43.104	32.7428	31.1015	52.0639	47.0758
Nudt4-201	40.9256	50.9712	22.9987	29.999	56.1326	49.5687	33.275	33.1959
Atp2b1-201	32.7456	37.729	39.9345	43.3112	45.1111	47.7661	42.3812	38.4557
Syt1-201	219.097	225.429	199.197	200.84	207.568	232.677	164.297	156.576
Zdhhc17-201	16.5357	12.6235	20.1689	21.4608	30.0328	30.604	36.8178	32.9086
Nap1l1-203	26.21	29.0188	24.5447	23.9067	40.6692	40.8462	40.7045	36.0573
Atxn7l3b-201	39.2771	47.913	40.4492	37.5009	46.4342	47.4145	40.9988	40.0154
Zfc3h1-201	13.0619	14.8557	19.7694	20.1389	15.4358	17.6698	30.1177	27.7555
Cct2-201	71.8891	63.5322	65.072	67.5697	65.0721	65.5887	54.3449	58.8981
Yeats4-201	48.8755	59.248	37.5602	42.587	36.5213	28.2179	34.1815	37.3833
Mdm1-201	21.9259	18.0296	36.126	28.3161	37.2919	33.0975	43.4483	40.3188
Dyrk2-201	29.4602	29.1497	33.3449	31.7901	33.4201	33.4226	31.188	30.2897
Gns-201	55.2887	57.1373	44.0068	52.1293	46.8482	42.4179	34.6307	31.3556
Tspan31-201	49.8137	39.9115	54.7144	47.2723	40.7299	43.4788	41.2627	40.7771
Os9-202	42.5361	47.6294	48.0494	39.0844	24.1247	22.2793	17.5783	22.1618
Dtx3-201	57.1765	66.3042	60.955	50.3153	55.24	49.099	50.6697	64.19
Dtx3-202	55.5352	45.9498	48.0828	47.4806	41.8582	41.9238	73.4383	83.3257
Pip4k2c-201	68.9201	62.936	54.0488	52.8475	55.3629	52.46	49.2538	49.9548
Kif5a-201	52.7175	57.4263	40.9883	44.5301	45.0246	46.4541	38.9471	40.4431
Dctn2-201	63.3649	71.6506	64.3511	67.8975	66.115	60.3813	61.7098	61.4775
Ddit3-201	38.5295	47.8935	53.3207	49.8114	38.8622	38.4198	32.6834	38.1684
Atp5b-201	588.112	571.263	542.493	549.769	557.23	527.836	489.512	496.539
Cs-201	58.8804	54.2283	56.1725	51.2064	61.6163	61.8361	47.8462	48.1179
Smarcc2-202	43.7006	39.9894	53.5191	46.5487	45.3989	50.9957	38.5394	39.4664
Myl6-206	178.738	166.022	209.155	165.687	89.0183	77.1104	137.298	149.316
Rpl41-203	382.743	313.39	366.097	349.679	150.712	132.731	307.504	351.437
Rab5b-201	48.6927	48.4057	45.7522	39.9486	39.2402	42.4831	38.8711	37.4132
Sarnp-201	43.2795	36.2131	29.2213	35.137	26.8476	27.7646	44.8839	42.7017
Cd63-201	34.595	39.2836	25.3957	25.8195	32.9272	35.0286	30.0621	28.8256
Bloc1s1-201	70.0875	76.0171	61.6895	51.3279	36.715	41.1925	40.9693	40.7274
Neurod4-201	26.8837	22.6203	26.522	20.8645	48.2947	52.1149	41.8704	38.2368
Arglu1-204	24.9349	21.4177	19.45	20.1681	42.5393	40.7883	52.0812	47.6943
Cul4a-201	36.4443	30.9643	25.2912	31.7345	31.9998	36.2382	29.4522	27.478
Lamp1-201	110.156	100.556	84.4206	81.408	77.7243	78.9604	74.3082	71.4596
Grk1-201	327.585	326.778	397.371	407.561	245.255	270.972	349.849	338.029
Gas6-201	96.0399	92.249	92.253	89.8869	72.8705	65.2465	63.2824	67.5515
Agpat5-201	21.2476	23.8335	33.0875	26.0932	27.6657	26.0283	32.8175	31.6685
Polb-201	32.4905	28.1469	43.6775	40.6126	28.4539	28.4709	44.9312	45.8362
Adam9-204	37.1784	38.7194	39.6734	42.9061	38.0521	37.5305	36.2686	29.9816
Chrna6-201	41.2802	38.8281	31.1935	28.9996	34.8509	36.5629	37.7026	39.1955
Ppp2cb-201	41.6154	37.9713	32.1498	34.2354	33.9074	32.4161	34.0647	33.8057
Saraf-201	70.725	79.6879	68.0467	76.0848	63.3022	72.6887	66.3942	67.4297
Slc25a4-201	255.042	287.143	195.859	216.691	248.209	243.504	229.793	250.786
Wdr17-209	56.2877	50.7154	72.3177	65.117	57.5584	58.9092	78.8542	69.9756
Gpm6a-201	55.9599	68.8445	44.6885	47.0262	105.842	111.837	98.6322	83.2797
Cpe-201	655.826	664.807	643.39	603.536	692.552	674.367	491.416	484.856
Atp6v1b2-201	145.557	158.791	142.072	140.92	185.336	176.287	162.593	160.604
Ndufa13-201	85.7305	73.7296	66.6912	75.0118	45.0311	40.5803	61.0072	66.4286
Tmem59l-201	63.802	65.7942	64.99	63.6387	81.4688	83.0102	71.9132	67.8539
Uba52-203	218.863	227.326	264.98	223.746	54.035	63.2871	168.256	206.64
Lsm4-201	51.9003	54.7353	36.0658	43.8008	49.4825	39.6875	40.8111	31.6982
Jund-201	44.4839	49.153	40.9551	39.3342	38.4296	30.6868	25.5795	27.8405
Rab3a-201	175.503	153.111	151.86	152.808	148.457	150.214	108.768	106.203
Pik3r2-201	30.2806	29.4807	30.1133	31.0037	26.5349	23.894	19.7866	24.337
Ccdc124-201	42.1621	45.9486	37.7209	44.028	33.7547	30.167	29.1775	31.4021
Rpl18a-203	230.968	232.441	238.246	214.541	72.5602	66.9616	159.483	189.933
Use1-201	97.2689	77.0777	76.5314	86.0084	60.8719	56.006	75.6609	88.896
Babam1-201	38.9889	38.1425	37.5581	40.5678	34.687	32.4986	32.0615	33.1065
Abhd8-201	108.711	97.3343	101.225	96.02	113.45	97.4645	90.3656	105.367
Nxnl1-202	169.724	145.79	123.846	120.508	99.0411	97.3579	95.9381	101.055
Fam32a-201	31.3831	29.1326	22.476	24.1818	20.6383	23.4403	22.8723	23.9632
Ndufb7-201	120.618	109.585	114.304	107.158	59.8392	61.1147	90.9385	107.526
Prkaca-201	52.7586	63.3082	47.394	50.5787	59.9673	57.3752	38.1098	37.2319
D8Ertd738e-201	56.9154	56.7811	70.4875	61.4441	54.8035	51.7631	61.663	57.6331
Calr-201	141.418	170.097	163.004	190.203	108.249	104.12	122.978	120.586
Rtbdn-201	89.3041	78.7254	96.5384	82.8016	50.9091	49.3657	77.822	85.7247
Rtbdn-203	442.527	413.775	350.291	438.617	313.713	299.142	286.512	309.639
Asna1-201	68.0666	69.7013	53.3487	57.5229	55.4877	44.5942	65.8435	76.0488
Trir-201	71.1179	82.9812	65.5909	62.1314	51.8923	40.8158	57.8787	56.5203
Vps35-201	32.0802	30.6745	29.398	28.7426	44.4446	46.0132	56.607	52.4197
Dnaja2-201	54.3631	54.6727	45.6182	42.7684	54.6688	53.7557	50.6477	45.6089
Itfg1-201	27.8804	35.1481	21.8495	27.1987	34.8316	35.978	41.1782	36.2749
Chd9-206	43.3879	51.7932	39.3862	41.6023	49.9356	43.2543	27.1432	24.9883
Aktip-205	42.7994	35.6591	27.2273	32.6143	37.7062	37.334	40.6512	43.8093
Fto-201	39.7968	49.7425	41.0141	40.881	54.4216	53.6802	34.4203	35.0127
Gnao1-201	49.0953	40.4714	42.1041	35.4848	69.2708	69.0954	34.108	35.501
Gnao1-203	52.0015	61.5763	33.883	44.9546	40.6503	44.1428	32.3068	35.4949
Amfr-201	42.3917	49.0817	41.8483	41.3916	49.242	48.254	40.8185	37.2263
Bbs2-201	24.1779	27.3407	33.9996	32.4181	27.5786	28.4814	37.0955	36.6054
Mt2-201	44.776	37.6167	12.3453	15.1413	31.411	32.0207	28.5193	25.8465
Mt1-201	93.1535	80.0563	43.5822	54.5638	84.5039	63.6208	63.6447	66.3988
Arl2bp-201	53.1619	59.8845	41.2954	38.1382	51.903	53.944	36.3138	37.5677
Cx3cl1-201	28.3397	23.471	22.0474	23.7185	32.8627	31.9886	20.7451	21.929
Polr2c-201	31.9937	36.5945	27.0496	34.2126	30.5422	30.4707	33.6348	31.5979
Cngb1-202	138.202	139.08	136.889	138.607	98.5688	105.922	102.246	109.878
Cngb1-205	16.9551	16.8552	18.0597	22.0347	11.083	12.3959	27.6676	30.4539
Cngb1-201	379.294	327.235	266.423	275.845	167.387	168.571	192.073	234.836
Cngb1-210	64.2197	78.9827	74.7722	61.3613	51.5028	54.2526	53.1716	51.4991
Got2-201	103.594	107.98	78.4653	87.055	96.5968	95.353	73.1016	73.6493
Tppp3-201	72.9724	62.2522	39.5863	51.3507	45.1158	41.974	67.8754	72.003
Atp6v0d1-201	90.8438	101.567	77.696	82.5415	95.5452	95.5521	78.8272	85.0993
Ctcf-201	28.5609	24.6173	20.4971	23.2226	28.8322	30.0077	26.2461	26.052
Chtf8-204	38.7092	34.2175	42.1738	34.5669	32.8578	31.8852	35.1245	39.2758
Vps4a-201	47.0431	47.8267	46.7084	47.7419	43.6947	42.4754	36.1162	36.2633
Psmd7-201	57.1035	45.8916	43.9637	48.6411	43.1643	43.0566	38.241	36.2227
Calb2-201	266.445	267.656	192.501	205.935	204.65	197.976	214.192	209.992
Mtss2-201	32.8015	32.6114	22.7597	26.1558	26.1467	24.66	14.5792	16.8336
Sf3b3-201	31.959	31.6064	26.3252	30.928	30.0252	29.021	24.8209	19.8595
Ddx19a-201	29.2016	29.7875	25.9731	30.0493	23.9067	23.8851	19.8998	17.0293
Aars-201	46.085	43.3435	34.8904	34.5401	35.1727	34.9871	30.4242	34.721
Gabarapl2-203	56.9127	53.8462	42.1884	40.2732	51.2936	41.7313	59.1527	60.1659
Vat1l-201	31.7225	35.9803	28.4474	26.182	30.2247	30.6711	18.8866	18.3162
Gcsh-201	29.5	30.1753	18.5898	21.4113	23.395	19.1896	26.2015	22.4062
Hsbp1-201	111.198	120.883	109.008	101.225	92.1537	94.2085	93.5085	90.9662
Cotl1-201	56.9743	45.7478	46.5061	48.7736	48.8577	38.9717	29.8872	31.3804
6430548M08Rik-201	64.0746	69.7545	59.5908	59.2032	73.7578	73.6141	46.5254	44.5127
Gse1-201	26.1644	26.0909	31.8573	31.7837	26.3864	23.7975	23.3634	24.4471
Cox4i1-201	354.42	297.026	250.446	291.917	238.524	213.86	314.792	321.024
Map1lc3b-201	59.7533	61.1362	44.151	46.745	58.444	54.0597	50.7147	57.3372
Rpl13-201	327.071	310.564	255.238	311.861	226.892	188.127	308.395	281.897
Tubb3-201	67.3836	57.92	50.9001	55.9167	60.3147	60.5298	44.0523	50.6244
Tsnax-201	59.8647	61.5854	50.0823	56.389	57.5161	55.8439	46.2884	46.5552
Tomm20-201	37.7388	36.6229	37.0074	30.8743	46.3906	43.757	51.4833	49.4139
Pdhb-201	50.0571	56.5138	50.9355	59.5345	60.2303	56.6383	72.4535	75.0729
Cadps-203	34.8693	39.3567	35.8928	33.5433	43.2586	43.7003	40.1479	41.0408
Synpr-201	34.087	37.3825	27.533	30.4906	89.7395	90.606	80.6856	75.2432
Top2b-201	25.045	27.4447	24.2124	28.7013	28.6267	31.2077	31.7187	29.6433
Top2b-202	32.5266	39.054	15.4606	20.1804	12.7477	10.3613	12.5416	14.5324
Nr1d2-201	33.2194	27.664	31.0551	30.8536	48.413	49.0139	47.4195	46.2705
Rpl15-202	27.1006	29.8176	31.0481	27.4176	20.5817	21.9381	41.2312	38.8669
Rtraf-201	46.8214	40.5416	44.7532	34.9415	34.8719	34.3808	45.5631	40.0455
Rps24-201	444.938	427.943	273.842	363.38	208.438	190.054	321.902	364.394
Rps24-202	120.752	149.621	99.2111	122.487	105.351	104.08	125.851	109.325
Cacna2d3-208	34.4561	31.5476	13.9915	15.7177	27.8628	31.1923	40.8035	39.9968
Lrtm1-201	26.4159	28.5196	21.5345	24.3504	28.8132	30.1871	25.9181	23.6333
Tkt-209	104.655	85.966	98.9796	91.394	84.2902	85.1616	57.0957	62.8202
Timm23-201	66.633	62.6363	33.528	42.7854	39.9918	40.0597	48.6981	51.209
Ogdhl-203	30.6651	24.6239	26.4396	27.7049	30.5408	31.413	22.7162	24.0951
Rbp3-201	1557.68	1528.79	1650.2	1612.47	1012.63	1070.04	800.12	849.127
Sncg-201	159.465	142.13	111.598	114.19	86.9036	83.0982	120.421	132.572
Lrit1-201	94.0361	92.8614	98.8958	90.8496	76.3075	89.2945	92.0608	89.5734
Lrit2-201	62.7889	70.2489	77.7531	62.8653	71.4864	74.2865	98.6997	94.0532
Cdhr1-201	390.932	375.341	468.32	504.405	277.892	297.087	302.879	309.287
Ghitm-201	69.9456	77.5805	59.7706	65.0991	120.338	121.072	124.38	111.143
Ghitm-203	85.2904	82.292	66.6675	70.6324	38.4239	46.7722	54.1453	62.0603
Ndrg2-201	24.6744	30.8255	31.1647	36.2636	24.865	32.8807	27.1307	23.2313
Rpgrip1-218	77.5322	77.322	83.7343	74.8674	47.5712	61.4445	126.059	124.578
Rpgrip1-209	43.7163	50.495	47.7382	36.4582	18.5703	22.4014	36.1515	31.2508
Dad1-201	61.2777	73.4028	50.1657	63.6511	62.1566	61.165	68.5266	78.1023
Abhd4-201	30.805	25.4405	15.0308	17.8108	0	0	14.577	16.4806
Psmb5-201	73.657	72.6524	81.4878	71.4685	67.8464	71.4034	74.0872	85.269
Acin1-218	35.5034	37.7488	37.9145	47.2569	32.0376	30.8946	31.18	28.0605
Bcl2l2-201	50.968	46.7588	39.2437	49.8947	49.0477	48.0053	42.5322	41.4934
Pabpn1-202	28.4367	33.5571	26.5285	23.8682	48.455	46.2795	55.9684	48.1503
Nrl-201	102.45	102.809	82.2987	85.9964	51.9016	48.0878	66.3811	65.2784
Nrl-203	759.797	775.782	636.599	656.653	690.94	651.526	710.679	735.104
Nrl-206	32.4682	27.1289	25.2794	28.741	26.3833	24.2131	40.5091	41.8563
Nrl-207	202.05	174.386	154.682	143.926	59.6183	62.1031	112.105	112.075
Ctsb-201	106.479	103.243	93.3554	93.5787	86.3286	85.6267	78.0738	82.0135
Ctsb-202	82.0044	70.0834	78.4733	98.1608	78.7328	89.8295	86.2204	94.9099
Rp1l1-201	155.335	149.948	155.874	160.519	101.649	106.881	102.625	105.376
Rp1l1-202	25.2212	29.1186	29.3363	30.7022	36.4538	31.5271	21.6518	25.5907
Mir124a-1hg-201	239.979	229.138	279.732	274.121	272.832	264.79	389.765	395.899
Clu-201	320.799	346.628	282.155	315.461	331.719	303.886	160.741	157.995
Bnip3l-201	18.8799	21.3522	26.5559	21.2149	40.9359	41.0742	43.977	39.0109
Nefm-201	56.7821	55.1162	38.3716	37.1469	41.745	42.0938	32.213	36.7626
Nefl-201	160.891	157.653	107.327	110.604	142.771	142.53	124.449	129.778
Ccar2-201	32.2517	35.3146	34.6032	33.5705	29.9962	28.355	26.5377	28.9326
Ppp3cc-203	59.5415	51.4592	66.8932	64.6931	43.4863	44.3319	52.3114	57.089
Itm2b-201	154.951	120.995	130.469	130.696	253.929	233.137	183.339	163.345
Itm2b-202	225.489	221.344	217.788	196.198	108.871	123.174	107.979	119.786
Tsc22d1-201	92.6773	99.9197	73.315	66.787	114.604	102.388	89.9172	86.7413
Akap11-201	23.3486	22.6458	30.4314	25.1343	25.9551	27.1966	30.7514	30.0203
Gm10076-202	67.15	82.671	60.691	69.3406	35.4196	30.9462	53.1791	45.2437
Mbnl2-204	29.7346	29.3336	27.7031	30.6015	17.3314	14.7458	19.1255	18.789
Ubl5-204	130.578	131.274	128.31	137.806	80.4722	84.0823	140.753	140.125
Rdh8-201	64.9721	60.6402	65.7724	76.4642	46.5076	47.4797	56.1115	55.6129
Eif3g-201	82.858	79.7455	57.5555	75.8298	58.5965	54.9687	53.4244	60.7477
Cdc37-202	62.2754	48.8924	45.7048	54.7004	33.764	34.4738	33.4589	37.2676
Smarca4-204	46.8717	38.9596	36.3184	44.0667	29.2368	30.8746	22.0142	26.8501
Septin7-202	50.5458	57.9583	51.6375	40.8919	60.7089	68.9945	74.183	65.471
Glb1l2-201	47.014	39.029	43.5806	45.809	45.9156	45.1748	51.4271	53.1444
Ntm-201	38.6392	40.4927	19.7467	18.1296	31.9369	30.5433	22.3303	17.4644
Gramd1b-214	64.6024	61.2941	67.1918	72.277	52.5773	55.1703	69.9108	70.237
Hspa8-201	250.84	219.858	317.02	317.754	375.592	362.64	411.673	353.217
Hspa8-202	339.949	340.47	357.999	414.343	141.869	151.748	155.842	188.504
Tlcd5-201	69.4858	78.5257	83.8784	83.4992	62.7301	62.9689	73.2806	68.3642
Thy1-201	111.124	105.089	82.6124	82.5608	92.5728	91.2257	89.4612	95.186
Usp2-201	39.0024	48.0073	20.9137	20.7789	37.9728	35.8579	20.7351	20.1239
Abcg4-201	31.9597	37.9763	45.208	37.5544	32.7706	31.1104	23.7916	24.6217
C2cd2l-208	46.9505	52.4867	48.7621	56.1768	49.624	45.5576	59.0144	48.5769
Trappc4-201	23.0676	25.9115	34.3792	29.0531	23.2574	26.566	25.0901	27.0647
Rps25-205	320.924	291.077	305.735	332.516	245.876	237.771	325.097	335.752
Ddx6-203	26.8205	23.3497	46.162	37.8583	44.3832	45.7723	35.6757	34.8756
Arcn1-201	39.7686	33.6951	37.4745	36.0505	39.2909	40.2862	37.6865	36.3144
Gm47160-201	25.3564	28.7109	46.6212	38.8314	22.0954	23.7822	44.2243	42.7728
Timm8b-201	129.089	100.498	80.6412	104.153	62.7727	65.2009	128.58	138.501
Elmod1-201	37.1986	42.1794	26.2238	34.6382	36.0952	30.3995	38.4867	38.1271
Idh3a-205	35.0383	27.9639	9.95677	12.8062	4.89679	4.39067	17.8305	21.5417
Rcn2-201	34.6734	39.3739	26.8159	31.8475	44.0518	37.8821	34.9893	31.2179
Scamp5-201	155.076	147.001	135.782	143.219	152.972	151.007	126.547	132.641
Cplx3-201	106.872	106.522	81.363	90.6415	105.547	106.209	76.4809	73.3786
Cplx3-203	135.107	111.322	99.1418	89.9383	34.9019	26.4163	43.6789	53.4173
Nptn-212	48.4042	63.4955	76.7039	74.0172	48.0525	46.5584	58.5276	63.6245
Bbs4-201	62.4571	52.9513	70.285	62.2026	63.2516	63.3162	76.2393	73.7065
Pkm-201	1363.35	1280.65	1400.14	1463.11	904.275	863.216	784.347	869.05
Pkm-202	414.208	372.473	435.561	405.83	509.403	503.783	410.697	408.665
Gm49759-201	14.5564	14.98	30.3099	28.0558	22.4587	23.8812	40.1728	40.0135
Gramd2-203	27.2556	24.5371	35.6644	41.4982	23.8135	22.6196	27.6288	31.1136
Nr2e3-201	182.042	182.522	188.801	198.206	188.91	176.719	232.674	234.144
Anp32a-201	95.1338	118.865	102.665	110.717	104.339	101.215	102.569	104.511
Coro2b-201	58.779	65.2946	49.7012	58.6648	55.1337	53.4611	39.7209	40.6984
Rpl4-201	382.069	387.674	289.301	357.043	280.231	274.36	279.243	269.236
Map2k1-201	31.7943	28.9053	31.1461	27.4912	43.658	44.1771	34.2132	35.5455
Rab11a-208	12.6294	11.0225	7.25008	6.93763	30.3218	26.8507	29.2137	23.6108
Slc24a1-201	422.389	418.421	465.565	455.473	293.422	318.589	289.281	284.36
Hacd3-201	66.1504	69.1686	65.4134	61.5801	69.1131	72.0938	71.8146	65.058
Ubap1l-201	55.1814	42.5262	44.1484	50.3464	34.2182	36.0269	44.447	43.4128
Snx1-201	28.1782	32.2205	27.4158	28.7241	28.1742	27.9803	31.3107	27.7276
Ciao2a-201	26.4146	31.8669	16.8665	19.8152	21.6296	19.7089	26.479	30.8461
Polr2m-201	62.509	61.4626	49.2121	44.0089	72.1119	72.6113	48.5779	45.194
Nedd4-201	110.021	123.94	102.111	107.998	103.122	111.698	99.632	92.297
Ccpg1os-201	30.0188	24.8123	27.4173	22.1319	13.8365	13.277	23.5427	25.1148
Gnb5-202	248.395	302.162	279.688	261.537	233.645	243.518	300.753	305.818
Leo1-201	27.2562	21.1901	30.6845	27.1704	19.8085	22.5654	17.6388	16.9881
Eef1a1-201	979.647	998.682	1112.49	1116.73	965.936	946.568	861.21	835.303
Cox7a2-201	175.933	140.505	143.505	127.88	94.4409	82.128	162.527	172.841
Sh3bgrl2-201	31.9251	31.9214	42.4286	32.1572	38.836	43.1042	38.5782	36.9523
Elovl4-201	152.486	158.024	187.41	164.169	181.299	185.451	188.845	179.088
Me1-201	43.2813	49.9326	48.9509	48.8282	59.4307	59.5898	45.1773	43.1416
Nt5e-201	43.5541	47.1328	51.1851	50.1192	43.081	44.1082	58.2492	55.8454
Rasgrf1-202	27.2064	24.0606	22.722	23.7118	29.0521	30.1439	20.9252	20.9669
Morf4l1-202	90.6292	88.305	60.1357	73.7172	103.669	100.863	103.578	103.054
Atp1b3-201	41.1844	47.6885	42.6959	41.1621	49.025	45.0273	32.3164	30.1244
Rnf7-201	47.7494	45.3173	38.1039	45.2344	40.8504	40.0142	54.8221	49.9573
Copb2-201	36.5011	39.7699	37.0438	38.1547	31.9153	30.1253	33.2168	31.8887
Rab6b-201	68.8291	66.3433	53.6433	54.6799	67.8164	71.0568	44.524	43.9778
Pcbp4-201	218.885	204.875	293.883	261.7	189.656	176.12	200.518	221.342
Tusc2-201	42.1495	50.344	46.3538	47.1605	45.0915	43.7822	39.2996	36.8702
Slc38a3-211	32.2128	27.2756	35.1736	37.511	47.8607	39.8395	64.1319	66.6914
Slc38a3-209	114.309	120.543	159.677	153.673	120.415	123.626	115.724	111.023
Slc38a3-212	23.725	19.5451	13.9168	10.6568	17.1264	12.9093	29.789	30.6145
Gnat1-201	7870.25	7710.29	7341.74	7779.83	5284.24	5403.46	4612.47	4580.4
Gnat1-205	121.687	107.259	212.556	186.594	109.406	104.175	159.248	185.445
A930036K24Rik-201	24.1911	30.2948	37.415	43.3475	38.8331	36.6235	92.0346	90.604
Sema3f-201	15.83	19.3285	31.5217	26.6243	22.2971	21.0086	21.2389	24.4156
Ip6k1-201	50.3303	48.124	64.3374	60.2137	57.7855	56.873	56.2296	56.9325
Rnf123-218	70.1544	60.1456	57.1098	66.4369	41.4797	46.6874	40.3676	42.4335
Nicn1-201	35.0081	30.5014	29.8952	35.8572	35.5864	38.6017	31.0336	32.3224
Rhoa-201	54.7903	52.7741	50.1847	44.997	51.1883	51.0358	43.1831	42.827
Qrich1-202	25.8468	32.2527	22.3966	24.9182	19.5528	20.6671	15.5368	15.2756
Dalrd3-201	31.7286	25.4059	33.8198	32.6665	32.5611	32.3796	41.3984	44.933
Dalrd3-203	21.0237	23.2604	32.7294	35.5022	24.7885	23.1064	36.8526	38.3054
Wdr6-201	84.9847	90.5961	78.8124	81.8773	94.3263	88.7885	66.5693	69.2899
P4htm-201	33.8487	35.8101	34.359	39.5567	34.8183	32.9307	33.5079	37.6212
Prkar2a-201	26.8048	30.0583	26.3503	32.6938	31.7861	33.6952	24.7667	21.462
Ip6k2-211	98.8093	82.8735	25.6356	32.0545	54.1526	60.3028	46.4462	60.5045
Uqcrc1-201	106.085	112.061	107.099	89.7241	101.3	93.784	89.1899	91.7899
Tma7-201	691.061	553.405	580.911	672.974	381.311	376.776	596.622	665.416
Plxnb1-201	22.647	17.6088	27.9269	29.0013	22.222	22.3262	28.2251	30.297
Map4-205	40.1437	35.9462	32.3375	40.5432	38.0179	42.7985	29.9307	27.8134
Map4-204	63.7567	74.1358	71.7998	67.9248	90.3084	87.0414	55.6398	53.4311
Map4-203	47.6901	57.4219	61.3008	57.3488	57.9534	57.4358	48.3734	50.4912
Cspg5-205	28.7337	32.2813	20.6616	24.2659	29.7837	26.8817	18.0277	19.2817
Scap-201	38.4362	39.4435	47.8111	43.992	37.6051	36.2531	32.6907	33.0955
Klhl18-201	56.095	53.7222	54.6122	50.3627	33.8783	26.8357	28.8503	34.3689
Ccdc12-201	57.5633	52.0875	40.0692	49.1442	32.2833	32.3217	28.8427	34.8402
Epm2aip1-201	15.7132	14.1143	18.3242	16.4828	28.9995	32.2779	40.7867	37.0529
Clasp2-201	15.0627	13.699	16.8705	19.8992	30.4812	30.0696	29.0916	26.8908
Dync1li1-201	43.2568	44.3613	38.6096	45.8265	40.132	39.7616	34.0455	37.6373
Stt3b-201	24.7221	30.8145	32.6375	32.0656	26.8394	26.1662	24.3622	25.1198
Azi2-201	15.9472	14.5334	14.4927	16.3639	26.1327	25.1102	47.7734	39.8561
Rpsa-206	372.297	355.52	306.361	338.362	184.537	172.432	235.439	272.981
Rpl14-201	240.886	217.592	184.186	234.243	177.86	176.408	226.628	221.636
Ctnnb1-201	80.272	79.3164	64.6919	60.7919	81.6893	68.7	67.8002	56.5342
Ctnnb1-215	0	0	0	0	37.5908	43.8388	23.2389	29.6455
Nktr-201	20.645	23.0829	25.6403	31.0976	26.8252	27.4395	37.7154	34.5331
Fyco1-202	39.838	42.5953	42.802	38.2845	34.451	40.499	49.2752	50.5707
Drg1-201	34.4947	26.5819	32.5337	25.6996	28.8695	28.3592	30.9674	35.71
Selenom-201	64.8094	75.9398	57.6367	61.6693	60.639	54.7437	61.425	68.0742
Osbp2-203	331.2	306.536	261.335	269.259	204.687	201.834	203.144	215.15
Mtfp1-201	36.3285	38.4842	35.4047	37.9028	38.7506	34.269	30.4874	34.072
Uqcr10-201	116.202	99.8595	130.166	120.216	89.2386	77.0953	154.815	157.03
Thoc5-201	58.5674	58.6295	65.3514	52.4422	31.3213	36.136	37.1591	38.7423
Xbp1-201	22.1884	24.6434	30.512	30.9152	21.0126	18.7705	29.5799	27.9165
Tmed4-201	22.4921	24.539	23.3233	24.1426	30.1411	28.1203	29.2492	28.9077
Ogdh-201	41.545	47.4043	42.6763	39.0283	34.5518	33.7767	26.8742	29.033
Ppia-201	498.344	450.272	401.868	438.41	271.936	231.289	423.58	485.104
Purb-201	58.2132	67.7009	52.7885	50.2801	66.8583	71.7916	64.0011	59.5683
Adcy1-201	43.0726	37.449	52.5677	47.5321	36.4162	41.0689	40.7674	41.6816
Cnrip1-201	31.4917	27.0349	24.5337	26.076	26.2957	27.2684	27.3884	27.1179
Actr2-201	26.2153	26.5818	22.1321	18.53	34.9937	33.5088	30.3357	26.5388
Lgalsl-201	67.353	69.5348	66.5529	66.7708	82.8871	80.3354	90.0371	85.8454
Lgalsl-203	27.0036	32.223	23.4054	18.3805	10.4349	13.2116	21.3469	21.4099
Mdh1-206	178.154	196.136	193.603	177.02	187.118	176.725	285.793	275.781
Commd1-203	21.5565	26.7438	35.263	39.5711	29.5871	27.508	52.7871	47.536
Zrsr1-202	29.3547	38.27	32.722	39.0362	17.2994	20.4561	28.6953	25.1632
Cfap36-201	51.3417	63.0291	42.0099	50.2991	43.4383	42.6739	57.3317	52.0366
Rps27a-201	110.635	116.142	149.264	141.324	200.282	208.295	225.749	172.424
Rtn4-205	41.8264	39.6039	46.3721	39.8937	43.2787	36.7268	35.4739	41.15
Sptbn1-202	60.3429	67.4196	56.957	61.404	50.1433	57.4734	43.8424	41.1394
Nsg2-201	45.339	54.6079	51.1217	47.2584	63.7333	63.3359	56.2795	56.6056
Npm1-203	57.2868	50.0898	37.3591	47.1913	10.3984	8.79499	24.0533	21.0556
Ccng1-201	22.1206	25.842	23.6102	24.6358	30.7834	31.8667	34.6299	32.0562
Rnf145-201	37.5273	41.7323	38.5094	42.7453	47.6875	44.6877	36.2478	37.3808
Cyfip2-202	58.5972	57.6823	53.5211	50.4855	55.1482	58.3731	36.819	36.5148
Rack1-201	138.389	118.782	124.074	137.579	111.499	108.875	153.417	133.92
Sqstm1-202	92.2108	97.719	75.833	74.5552	97.8104	87.9476	82.6339	82.7338
Canx-201	79.1173	75.516	73.5714	70.4286	83.688	89.4562	80.0863	74.1918
Hnrnpab-201	40.6376	48.0182	44.2913	36.3081	38.5819	36.8658	34.7708	32.1886
Sar1b-201	29.4876	22.6704	28.4874	27.728	38.2834	36.331	53.2645	54.326
Ppp2ca-201	33.4158	32.2636	29.1206	25.462	31.2619	30.2318	35.4857	33.3704
Skp1a-201	66.4722	78.5343	62.8319	69.7772	103.411	107.001	119.656	115.566
Vdac1-202	187.047	179.892	153.072	150.656	209.824	196.497	153.034	148.719
Vdac1-201	92.0353	98.9413	80.9438	106.845	33.4723	42.4968	53.3383	47.3754
Hspa4-201	35.2074	45.29	42.8031	38.0711	42.606	43.1546	35.2458	33.5538
Aff4-201	28.575	26.4301	28.3742	26.6181	29.0085	32.2797	28.2351	25.5337
Uqcrq-201	25.4605	21.9234	26.5295	21.9288	19.0634	18.3434	26.5125	34.8034
Uqcrq-203	70.5095	75.0329	86.1614	72.8026	76.196	61.6381	83.6728	99.1384
Hint1-201	134.049	157.691	116.972	137.519	104.532	101.26	159.662	165.053
Fam114a2-201	26.2666	26.341	29.4055	26.6197	27.1341	27.0322	29.939	31.1362
Rnf187-201	102.866	95.6172	75.0287	85.3514	107.54	91.8648	77.6864	77.5243
H2bu2-201	44.1014	40.7731	46.0032	50.0647	59.5357	58.594	68.727	84.7523
H2aw-201	44.6314	38.6324	75.9537	65.8474	93.3732	100.245	140.592	149.235
Guk1-205	109.095	113.846	159.56	140.934	106.064	104.182	140.529	150.812
Arf1-201	164.789	179.815	138.072	149.023	166.839	166.714	140.043	141.174
Cops3-201	35.524	35.0033	46.7853	35.8898	36.6784	34.8566	48.3937	46.5074
Alkbh5-201	34.9372	28.0474	32.8797	29.6244	33.9762	32.8211	26.6489	27.7521
Usp22-201	26.9613	25.1256	24.7506	24.5711	32.65	32.9284	24.3007	24.2705
Ubb-201	1140.93	1202.81	1203.04	1129.06	1248.53	1183.16	1136.54	1206.75
Hs3st3b1-201	24.7038	25.5195	27.3575	30.6794	25.3669	25.6721	24.9079	28.2493
Gas7-206	37.0174	39.9367	35.5836	36.4425	35.3058	36.2922	33.9742	32.4749
Rcvrn-201	1289.62	1185.7	1114.96	1173.95	813.703	791.705	846.849	850.518
Rpl26-201	513.672	480.015	437.375	500.521	283.497	269.599	532.534	535.234
Vamp2-201	490.036	507.582	394.814	454.573	338.608	328.032	235.225	237.341
Gucy2e-201	102.825	104.294	106.557	116.141	80.9074	88.9115	83.1371	85.7677
Chd3-202	30.8602	25.2021	23.9197	22.1469	23.1754	25.8573	15.4521	14.3845
Naa38-204	28.46	28.0391	27.8659	27.1131	17.2849	19.8522	27.4757	31.0998
Atp1b2-201	472.525	508.167	555.85	606.371	369.511	360.577	250.977	244.336
Atp1b2-202	127.813	113.664	146.908	143.024	94.4998	102.288	117.04	120.872
Atp1b2-203	176.952	165.49	244.845	225.013	106.579	124.746	122.654	125.133
Fxr2-201	42.4939	46.8404	43.5443	45.334	43.9346	39.0266	39.6663	38.2756
Mpdu1-201	44.8009	47.3204	41.3447	33.5199	47.662	43.1146	34.6469	36.7133
Eif4a1-213	127.911	117.38	125.776	136.678	121.476	117.246	136.421	133.148
Tnfsf12-202	138.146	116.933	115.567	106.961	79.9575	81.8641	80.9597	87.5842
Polr2a-201	62.0527	51.6982	53.3504	58.7938	53.4983	55.8523	48.0812	48.5349
Zbtb4-202	32.8957	33.4605	28.8785	30.2922	27.7216	27.0983	24.7418	22.4889
Ctdnep1-201	32.4867	24.8825	23.9977	27.2478	29.9781	34.4256	21.9074	19.9047
Acadvl-202	39.9788	36.5235	63.9632	57.8969	36.5404	35.7046	44.1656	43.3024
Dlg4-201	63.7514	56.6544	76.3718	91.7961	65.8117	61.4689	53.4269	56.2639
Dlg4-213	21.0264	19.5229	27.0431	28.3094	20.403	23.0052	44.1677	45.1055
Psmb6-201	143.362	139.096	141.797	146.288	84.9982	85.9611	118.889	122.476
Slc25a11-201	52.9376	53.2817	54.2088	43.6316	52.534	49.2871	40.7059	49.156
Spag7-201	62.9488	48.6995	48.1044	41.5882	41.9938	36.5616	40.0452	41.7537
Aipl1-201	328.082	274.964	280.989	262.615	204.643	201.736	209.827	207.569
Aipl1-202	86.1378	95.1632	126.768	123.093	98.039	103.492	136.418	157.809
Pitpnm3-201	72.7604	66.8938	64.8094	74.5935	47.283	39.7472	66.0098	72.27
Pafah1b1-201	28.3337	36.5863	38.1269	30.1797	39.973	38.0295	32.3752	30.8989
Pitpna-203	31.7544	34.1631	24.8124	25.6597	32.1321	32.741	26.6105	24.4978
Crk-201	19.5778	16.6457	19.9274	19.809	32.528	33.5516	32.2368	33.5375
Ywhae-201	165.713	179.11	156.913	172.021	235.168	220.815	193.336	186.667
Rpl23a-201	527.777	549.204	493.228	483.202	282.557	268.214	400.6	421.511
Supt6-201	34.5096	37.1008	32.8488	31.6829	25.362	26.7717	23.1115	22.6695
2610507B11Rik-201	27.6272	26.2505	33.4675	31.4808	28.5218	31.2706	28.6308	28.1577
Aldoc-201	29.9646	26.3537	31.9863	25.9516	35.7202	35.5401	26.1756	23.2294
Aldoc-202	228.597	220.864	249.764	243.064	243.415	234.456	192.039	203.366
Unc119-201	1358.45	1309.21	1126.82	1195.72	819.323	668.949	882.097	893.028
Unc119-207	24.6345	20.2167	27.8817	23.2583	16.8416	16.4945	37.2091	41.398
Vtn-201	585.94	555.771	530.918	536.573	422.474	399.045	387.242	417.675
Sebox-201	32.9093	34.4569	31.4242	31.1891	36.7923	33.3842	29.5887	27.8034
Poldip2-201	36.0955	30.1107	36.5789	33.3676	33.1739	32.7329	27.2692	26.5438
Nlk-201	46.8433	47.5107	47.3948	46.8435	48.4453	49.5411	46.2531	46.7912
Ccnq-201	20.0457	16.3292	30.1809	28.1894	27.0732	26.3078	29.5985	35.6518
Crlf3-201	24.3302	28.4302	24.9533	27.8847	37.2124	37.4289	31.6577	34.6396
Ap2b1-201	24.8684	28.7069	22.2381	28.4673	34.4999	34.2169	21.2572	20.7001
Rasl10b-202	27.1074	32.4082	22.2757	25.9073	29.4325	26.0891	17.154	15.6851
Cltc-202	42.789	45.4574	28.2987	21.8448	30.7377	33.1768	21.224	25.7466
Ypel2-201	33.2025	33.2936	29.7355	29.0244	34.5255	34.8834	34.6553	33.6253
Srsf1-201	35.939	32.3599	33.4674	35.9991	52.2693	50.1671	81.2398	74.1381
Vezf1-201	38.5079	35.6899	40.0794	44.6928	34.3451	35.3824	38.9886	37.9369
Cuedc1-201	31.179	32.6446	33.8316	28.934	26.5726	24.8698	19.5092	24.2056
Msi2-203	65.3144	62.7753	44.4437	55.6332	58.7123	60.2505	54.108	52.9945
Mmd-201	27.1431	31.9217	31.654	34.6245	40.8882	39.3772	38.9382	38.3844
Hlf-201	31.9297	30.8345	22.4833	21.1263	38.5624	37.4415	24.2949	21.5647
Tob1-201	38.9674	39.6888	45.357	41.0367	45.4411	44.0549	38.1913	41.6316
Ankrd40-203	51.8321	45.884	38.2363	42.5784	50.2184	48.7895	37.6476	34.2253
Lrrc59-201	36.4699	33.7338	40.6665	30.8843	30.4423	27.9505	25.9114	25.0837
Mrpl27-201	40.5883	32.5751	26.3115	28.4904	25.6148	25.9446	28.7219	25.367
Samd14-201	48.7523	45.578	34.2916	35.6558	43.4132	40.1471	26.8119	28.9627
Pdk2-201	29.5878	34.3244	25.8101	31.0272	30.7069	30.0281	15.7133	16.2537
Atp5g1-202	126.38	115.491	112.617	117.89	92.0875	80.7781	105.762	105.749
Kpnb1-201	27.5954	32.8812	31.1935	29.0219	29.9912	30.3596	25.2918	24.2191
Npepps-201	47.6349	40.5478	54.3519	44.5142	43.3383	45.7378	45.3363	39.7199
Socs7-201	30.6529	33.5287	37.7698	35.4659	36.0339	35.7652	28.467	31.6229
Mllt6-201	68.592	63.0014	59.4815	58.9911	39.4204	41.3987	38.7985	43.8389
Mllt6-202	0	0	18.3055	21.6702	26.7007	22.867	35.7289	40.3669
Psmb3-201	78.8048	64.2331	66.4781	65.3139	63.6742	50.2533	82.4429	86.8321
Rpl23-201	90.8337	80.5009	101.859	86.094	58.6714	67.9447	117.608	120.028
Ormdl3-201	88.17	82.6906	96.1267	91.5351	78.3775	77.5136	69.8365	73.7786
Psmd3-201	37.7913	32.0924	39.3703	44.7093	42.714	40.3342	29.6997	32.8345
Thra-201	96.6413	103.305	72.2232	90.9969	90.9274	80.2918	60.7474	69.6792
Nr1d1-201	82.7199	87.2646	76.0278	77.9085	78.8936	74.4356	49.9668	52.2867
Eif1-201	216.322	231.062	193.068	194.324	238.051	226.756	183.685	179.112
Acly-203	55.1288	55.6872	73.3588	69.1455	55.8486	54.0557	48.8215	46.4563
Rab5c-202	56.0047	58.522	48.1373	48.9479	54.8869	51.2118	44.2854	53.2717
Atp6v0a1-201	86.6044	78.567	78.8967	85.5394	82.0327	78.7971	53.1976	53.7267
Vps25-202	43.1394	54.629	31.1913	38.9489	34.7368	34.3305	31.5393	25.8897
Coa3-201	33.4985	43.5059	35.729	34.3409	36.5832	36.5807	50.4024	52.0552
Psme3-201	39.9479	43.8481	29.2058	35.9512	33.3133	32.9154	29.5933	32.2257
Rpl27-201	134.808	123.814	76.8262	97.8305	78.4252	67.477	102.662	125.795
Rnd2-201	34.354	34.4913	28.0903	36.2274	32.3145	27.1626	24.1836	27.5521
Nbr1-206	45.7831	36.2985	27.8467	23.3259	22.1239	18.9519	20.5703	22.6468
Arl4d-201	121.069	111.161	128.594	118.213	92.2404	78.3247	92.1111	97.4418
Mpp2-201	26.1274	31.5724	26.4497	26.4397	28.5162	26.8057	17.4194	18.6566
Rundc3a-201	38.1149	31.2003	41.333	48.2668	58.7621	52.1366	49.4309	52.882
Plcd3-201	23.3714	22.6684	38.4087	37.4924	26.7537	21.9978	28.6926	31.7891
Nsf-202	154.244	162.086	161.248	158.751	164.379	166.579	121.515	125.216
Mapt-204	28.9706	31.4872	29.3307	29.1	33.5524	33.0859	25.1358	24.7507
Dcaf7-201	42.0852	42.1198	38.0335	33.9492	38.5045	39.3651	30.3224	29.9341
Ddx42-201	40.0343	31.627	27.1341	27.6446	28.8384	28.2683	22.0044	22.2201
Psmc5-201	104.858	87.174	94.9662	78.219	72.6301	74.2826	64.2202	69.8115
Ddx5-201	185.774	199.292	201.27	197.069	246.041	256.165	235.393	221.252
Ddx5-208	134.224	165.109	232.33	216.229	215.987	225.92	387.719	353.227
Kpna2-201	184.277	190.271	215.046	219.193	171.617	173.112	229.238	216.826
Prkca-201	36.3568	38.1509	30.6299	33.6524	36.5256	37.0209	31.5641	30.2318
Rgs9-204	270.616	249.491	316.77	312.834	139.014	182.342	238.26	245.034
Slc16a6-202	23.7809	30.2853	30.565	37.2851	36.3265	35.0042	39.3837	40.9845
Prkar1a-201	82.5327	88.1459	67.1369	79.9195	106.73	94.1466	87.3122	80.8576
Abca8a-201	24.5907	28.2454	25.7945	25.1428	34.051	35.1808	30.9214	29.5771
Atp5h-201	226.653	263.665	217.329	227.934	136.03	138.788	221.281	262.884
H3f3b-201	239.132	242.988	270.933	242.375	295.441	283.983	297.454	289.255
Wbp2-201	183.747	186.134	142.736	164.422	168.319	160.894	99.0097	102.97
Wbp2-202	22.6677	23.2767	33.0215	29.1871	18.1119	17.8269	12.4921	12.3723
Acox1-201	36.0343	28.4796	23.3347	29.4894	26.8303	33.8842	26.7462	27.3228
Srp68-201	32.6978	29.6315	31.6338	31.9134	29.8038	28.8588	26.1822	23.759
Rnf157-201	53.5421	57.7427	46.8419	49.9582	38.5165	42.0325	32.5012	34.37
Cygb-201	59.3258	57.5492	44.2033	54.0278	55.4426	47.112	39.0937	42.7901
Prcd-202	307.01	278.228	287.01	309.352	214.498	184.178	263.63	285.178
Mxra7-201	42.7874	42.6334	41.9841	39.5573	34.6355	34.9797	29.4198	29.7059
Srsf2-201	46.6694	45.2682	60.8133	47.2956	89.6495	85.7223	93.4777	91.2499
Srsf2-203	32.8859	39.2944	50.7548	38.618	57.0295	56.0291	83.4679	79.0416
Sec14l1-202	36.7517	38.4649	41.3485	34.7886	46.5708	42.5729	33.6024	35.031
Eif4a3-201	47.6039	52.1697	52.1627	47.1164	38.1555	38.7162	37.9324	35.7104
Fscn2-201	82.5926	77.9243	85.7304	92.8987	89.9532	90.3766	94.881	97.2103
Pde6g-202	153.914	117.598	108.068	84.6038	171.553	168.74	123.14	124.451
Pde6g-203	37.2606	32.9717	47.0829	41.5207	30.3761	31.9327	60.7646	60.8136
Pde6g-201	3153.68	3010.73	2777.55	3054.11	1830.28	1777.62	2279.45	2341.62
Mcrip1-201	47.2983	44.4709	29.1946	38.7424	37.0392	34.4695	35.8937	37.047
P4hb-201	68.9181	63.1057	65.7322	66.6591	58.0574	56.7152	50.6721	58.3701
Gps1-202	39.0269	39.3217	20.904	27.6415	16.8341	15.6156	31.2019	35.8564
Gdi2-201	75.8321	60.0946	55.9025	57.0356	63.8681	60.1454	64.8678	56.0353
Pfkp-207	18.6569	17.8117	37.2259	29.8788	20.7859	21.3319	16.7746	19.6027
Pfkp-201	92.2485	83.2846	106.75	122.022	55.585	63.7395	55.2942	50.1287
Pfkp-212	39.2904	42.735	61.0425	65.5212	51.8908	57.102	67.0428	66.1581
Amph-204	41.7931	40.7074	42.3426	37.263	33.0836	30.8744	28.8281	36.9026
H2bc4-201	117.172	119.264	154.521	145.982	105.526	100.442	143.838	155.886
H1f2-201	63.0644	50.0066	74.9392	75.0665	63.8589	60.1763	64.4179	69.5261
Scgn-201	32.4087	37.3015	31.5559	36.6912	38.7231	41.6731	52.2272	45.9459
BC005537-201	45.0017	48.276	57.4645	48.1669	69.3672	67.8394	62.9304	59.2975
Acot13-201	43.2966	42.5718	32.6336	34.949	24.8475	21.385	39.9384	40.0074
Nrsn1-201	29.455	32.4693	41.6143	32.0917	54.7136	53.1994	34.2421	33.6193
Uqcrfs1-201	50.5776	52.7079	48.0765	43.3416	45.2816	42.3247	58.914	54.3808
Tubb2a-201	131.319	136.335	106.288	108.291	121.95	120.263	106.368	120.985
Mak-207	17.0992	12.9058	22.7915	24.2636	15.727	17.8995	36.6195	37.6285
Smim13-201	24.2664	26.0224	31.2118	27.0896	33.3557	33.1066	33.7092	32.5255
Dek-201	18.9674	21.3045	23.9249	20.985	31.7228	29.1767	45.1322	42.2477
Fam120a-201	46.0359	39.0418	40.3341	40.8601	41.7668	42.6128	43.9788	42.4712
Nxnl2-201	63.7332	69.0314	100.273	79.784	52.5318	48.5345	61.9379	67.9959
Diras2-201	43.9901	39.7691	34.8763	36.4179	54.3956	54.8768	34.351	34.97
Auh-201	33.503	27.927	30.7414	27.8422	25.2611	21.4544	25.7167	23.9738
Cplx2-201	49.729	49.4972	34.5864	38.5511	43.0569	45.6332	29.4419	30.4246
Higd2a-201	88.2281	80.3362	76.9173	85.6785	68.3974	56.6527	73.0691	80.4684
Cltb-201	101.757	94.0519	71.2675	85.395	65.186	50.7726	46.927	54.5668
Sncb-201	418.587	363.665	233.515	308.176	264.905	242.384	146.427	169.87
Tmed9-201	46.2574	49.0482	40.5434	50.4376	46.5268	46.6827	44.7612	50.4121
Macroh2a1-201	56.6089	53.7782	50.6663	47.2448	46.2606	45.4209	35.128	37.415
Hnrnpa0-201	41.726	47.046	36.2898	37.0127	39.9835	36.3075	31.5586	30.5974
Isca1-201	58.3009	59.6512	41.9369	53.0053	61.6424	60.4917	59.5221	54.3266
Ctsl-201	42.5349	40.4586	45.5874	40.051	41.6111	40.0715	38.7214	44.1995
Uqcrb-201	163.002	155.344	179.528	163.382	108.394	105.477	191.008	189.597
Ndufs6-201	101.383	92.5488	74.1429	56.8804	36.2807	36.3785	56.8789	66.503
Sdha-201	111.803	102.871	105.964	105.368	120.231	117.692	94.9559	93.8376
Cetn3-201	23.5334	30.5257	23.5027	20.6811	18.7514	19.8484	38.2387	38.3516
Ssbp2-202	28.421	33.0963	33.7239	32.7821	26.1266	30.2525	39.3171	42.8337
Scamp1-201	41.3819	40.5838	34.4413	27.7411	54.8046	53.0229	45.8161	38.3916
Hmgcr-201	31.7727	33.2194	34.3052	33.6	34.2843	33.7302	27.5642	28.8686
Fam169a-202	13.3329	14.7119	12.9677	12.3806	38.1981	38.4631	26.3291	23.9683
Fam169a-201	111.315	108.803	117.565	113.525	114.054	122.443	127.906	117.442
Btf3-205	107.859	101.4	76.5452	97.0212	123.496	127.921	128.853	122.735
Tnpo1-202	28.7746	33.4284	47.3596	44.0591	61.7312	68.2711	79.3546	74.53
Map1b-201	104.532	106.042	99.3372	103.596	63.1784	72.7059	68.2475	70.6105
Cartpt-202	30.8509	24.5875	24.7898	25.7592	35.8846	36.2619	30.0675	34.3099
Sgtb-201	29.2317	29.8763	29.4606	31.2504	21.7438	24.1574	24.7129	21.7873
Nim1k-201	40.2174	33.7884	27.5923	29.28	25.0622	25.5383	26.7033	26.3701
Sf3b6-201	34.0708	35.9934	36.5561	30.3481	29.6624	27.7332	48.1117	45.6221
Laptm4a-201	43.0166	54.9269	43.6905	38.3316	73.8844	67.7958	62.4228	62.574
Ddx1-201	31.1	30.2216	31.5621	29.1839	32.4866	34.0096	30.2429	30.9759
Trib2-201	32.8429	34.6877	39.1927	37.1478	49.6807	49.8707	40.9749	41.3154
Odc1-201	50.3937	63.757	65.3784	65.0876	63.4556	60.3298	51.4237	50.4377
Hpcal1-201	45.9888	39.7272	27.0384	29.154	41.802	38.7661	27.8447	33.3738
Ywhaq-202	67.0346	81.1802	76.5446	72.9328	127.217	137.353	126.219	122.517
Kidins220-201	25.759	24.8501	28.0214	24.2941	34.6767	35.3073	27.1191	23.9516
Dld-201	36.9518	42.1485	44.2108	39.5171	44.4912	41.106	54.8006	53.1211
Tspan13-201	34.6108	37.4486	27.9752	29.5487	42.5047	42.3462	34.1714	33.3608
Sptssa-201	16.955	21.4403	18.5784	22.7213	39.9295	35.1446	49.918	48.9839
Srp54a-201	100.138	118.566	121.881	112.908	56.7331	58.6405	94.494	80.4137
Fkbp3-201	85.2712	97.8334	70.9021	68.187	74.7785	68.044	96.0379	85.0868
Rps29-201	563.941	625.05	752.234	626.939	333.5	295.57	746.602	910.849
Rpl36al-201	85.7619	75.1236	53.9156	67.1867	58.668	58.4264	80.5589	79.2455
Klhdc2-201	38.8566	47.0527	40.8123	37.7063	41.8569	40.7991	46.0233	45.6476
Tmx1-201	32.745	29.5525	36.0924	30.3196	56.8719	53.5887	61.522	59.7106
Rtn1-202	42.8311	43.1192	36.5209	40.3505	37.5241	39.25	31.7555	30.3676
Rtn1-201	36.186	35.7636	23.0792	19.706	72.8373	80.5684	45.6773	45.987
Ppm1a-203	31.6701	27.6209	18.0136	23.7821	28.0142	28.7278	26.3886	24.6376
Ppm1a-205	67.056	59.0304	42.5602	48.3445	30.0432	28.1477	29.2373	29.3129
Hif1a-201	91.5629	96.8043	101.936	90.5466	90.7531	86.2154	91.4958	88.6731
Max-201	31.7409	28.4321	15.5508	20.3848	27.5824	30.6605	23.7635	30.2005
Rdh12-201	258.9	279.73	226.248	252.98	199.951	193.9	260.409	243.498
Srsf5-201	75.3459	76.7311	71.6087	84.2207	30.1781	24.0412	40.8965	43.9388
Srsf5-212	51.7977	59.1413	57.2508	64.8483	121.525	125.673	178.703	165.522
Srsf5-206	42.1067	43.5635	60.0401	72.1041	58.7903	64.2826	98.4928	80.8555
Dpf3-203	38.1835	33.9521	51.0443	44.1704	24.9299	29.864	31.8831	33.875
Rnf113a2-201	35.7815	34.4338	37.1078	29.0688	24.7094	22.6765	35.3366	37.2448
Vsx2-202	35.9396	37.1457	31.1715	24.8278	30.7573	30.314	19.5812	24.033
Dlst-201	26.2673	32.5771	30.267	29.4303	31.3962	24.9319	24.7535	27.9252
Tmed10-201	69.2161	74.038	69.9865	63.3197	45.4887	43.8804	49.4443	59.3896
Erg28-201	22.1521	25.2973	25.5724	22.405	30.5616	28.5325	25.2334	25.3079
Esrrb-203	152.654	147.955	164.864	165.532	73.4214	85.6905	85.713	84.6973
Ahsa1-201	43.7947	42.0634	43.7493	51.0256	43.9188	43.5702	40.7185	41.0135
Slirp-202	22.1895	18.8818	32.4557	26.0088	16.5275	16.2172	34.81	44.7279
Snw1-201	54.7522	57.6575	45.9093	48.648	45.8853	42.1057	49.7956	46.1792
Psmc1-201	83.2031	85.0533	57.1901	75.0496	58.3839	59.8609	65.4803	68.5699
Calm1-202	197.742	231.765	154.561	154.485	248.683	251.375	199.819	196.865
Chga-201	88.5744	103.111	89.5201	85.8999	94.4259	90.3499	54.5491	61.3595
Ddx24-201	51.2398	44.8865	38.6065	39.6582	38.0065	37.8334	26.6557	26.582
Setd3-201	30.0872	34.4788	25.5387	31.4809	35.2576	30.9525	26.0665	26.5973
Ccdc85c-202	32.8629	34.1061	35.8875	32.0506	32.7193	30.8954	18.9554	20.2201
Meg3-209	42.1151	37.3712	37.1008	34.4402	82.0012	81.132	78.4297	79.6123
Ppp2r5c-206	22.9011	29.1153	20.5633	22.4258	30.3999	27.7064	25.1389	23.4834
Ppp2r5c-203	46.2593	49.7071	38.5821	40.2478	29.5717	33.9022	32.0187	28.5704
Ppp2r5c-205	35.2439	42.3062	33.8068	34.1234	34.9996	34.1652	33.8753	31.8723
Dync1h1-201	61.485	55.0612	66.5296	68.1347	53.8859	58.2437	49.7089	51.3495
Hsp90aa1-202	166.485	190.444	266.427	215.137	152.76	165.948	222.391	220.322
Hsp90aa1-201	503.146	548.934	474.65	533.838	425.621	436.544	519.135	458.616
Ckb-201	814.827	757.325	803.961	744.151	1026.55	926.466	591.399	686.759
Rd3l-203	45.119	33.9438	31.6623	35.0965	39.0418	34.7668	48.438	40.6131
Akt1-201	45.4741	48.542	35.5153	43.3775	39.8437	36.8474	28.437	29.2236
Rapgef5-206	30.6456	30.6126	38.9204	38.44	42.7343	45.8172	45.0964	44.3898
AW549877-201	12.0901	15.8908	22.4712	18.5282	31.9682	36.7192	51.8516	52.7783
Rpl37-202	157.18	173.729	125.448	132.226	82.5914	86.7248	85.9356	109.655
Egflam-202	86.9137	69.6239	70.0736	64.2557	60.5388	63.9219	46.3449	45.6475
Slc1a3-201	42.9894	41.7646	27.8635	28.858	40.0738	41.7487	25.6858	24.5941
Sub1-202	21.1091	21.679	28.4585	22.3829	32.3705	28.1256	57.1403	43.4383
Zfr-201	33.1576	37.1207	29.9867	32.1647	45.4574	47.5998	41.5606	39.6936
Drosha-201	32.1061	31.0165	27.3034	30.1246	22.9384	22.2357	17.7694	18.0154
Basp1-201	88.3815	83.0911	56.3427	47.5156	50.4098	47.3835	48.2734	50.6089
Ankrd33b-204	56.6601	56.4915	54.1914	57.9222	52.9703	54.2986	51.6055	49.5046
Cct5-201	95.6878	109.706	131.884	120.13	96.6811	93.2278	104.484	106.459
Laptm4b-201	230.43	233.704	258.497	253.559	259.378	264.647	237.957	246.236
Cox6c-201	240.488	232.027	226.089	222.313	198.669	208.317	346.278	361.2
Pabpc1-201	67.2242	76.6164	54.2101	58.1057	57.2732	56.633	38.2704	33.9449
Ywhaz-201	93.845	116.938	72.8387	68.7665	91.7759	86.418	77.93	74.3931
Eif3e-201	66.2286	70.7251	75.2488	69.9476	56.1095	54.6729	86.3923	80.754
Eif3h-201	104.412	119.692	129.684	110.249	90.4407	87.3935	92.921	90.6887
Rad21-201	43.9088	45.8059	33.9043	40.5832	48.5578	46.9823	42.002	39.7029
Ndufb9-201	133.866	176.355	110.679	131.587	112.822	107.57	123.457	140.931
Efr3a-201	24.6808	22.8	27.6154	28.8208	34.333	38.4155	38.6967	38.2121
Ndrg1-201	109.835	101.674	80.3804	91.3108	90.6151	80.7448	63.1263	64.8447
Peg13-201	72.0486	75.4285	78.6398	79.6845	73.4857	75.564	58.9859	58.6557
Chrac1-201	33.6003	34.3621	44.9573	38.9537	26.6318	28.179	39.7799	44.1567
Ptp4a3-207	209.534	203.918	184.605	209.892	170.373	158.581	127.123	146.541
Ndufb4c-201	120.52	149.431	94.5757	103.216	85.4993	87.407	148.57	143.319
Lynx1-201	49.9084	50.6829	44.4859	46.1319	53.8754	54.8037	33.8538	34.5242
Grina-201	307.747	344.525	305.58	303.67	287.913	287.424	229.462	238.181
Vps28-201	87.0943	76.4527	80.4145	86.5377	62.5195	58.8342	76.0023	78.1727
Rpl8-201	431.715	406.998	385.408	404.16	313.342	286.687	305.43	332.999
Txn2-201	76.2949	83.8263	63.5758	76.283	77.2275	70.6259	61.8192	65.0407
Eif3d-201	55.1689	47.4161	38.6368	45.8916	44.7157	43.0269	34.7344	38.9759
Pdxp-201	44.9405	43.19	39.3939	42.9514	50.3026	44.1359	36.9124	35.2466
H1f0-201	44.3062	35.2568	32.2744	30.5021	32.2003	34.4013	26.0312	26.1195
Ddx17-201	41.3185	42.7981	39.49	35.8724	53.2	67.0071	67.3834	62.443
Ddx17-203	75.4361	67.8605	93.0058	97.5326	100.86	89.9297	92.7698	100.306
Ddx17-204	42.7455	38.5836	66.5377	56.6724	50.6283	56.3709	84.3532	81.88
Ddx17-202	27.5809	26.6774	54.0325	43.4573	34.7998	41.3456	78.0921	73.5243
Gtpbp1-201	60.3914	58.6448	70.5261	58.5537	56.8066	53.4021	43.6114	44.2678
Dnal4-201	30.0434	22.8957	25.8296	28.2701	28.2103	26.2221	23.2202	27.2406
Cbx6-203	21.6492	26.1785	18.9606	24.5185	31.4089	29.1939	21.0482	24.5134
Rpl3-201	330.756	342.002	349.032	365.601	318.407	315.364	320.45	314.284
Syngr1-201	92.4891	79.0056	86.6361	92.6504	76.6753	75.8559	65.4445	67.0364
Atf4-201	179.288	165.139	144.767	147.562	164.908	157.12	157.77	161.768
Rbx1-201	54.8872	48.5519	40.6822	40.1061	44.946	42.0806	47.5558	47.6577
Rangap1-201	52.0469	49.928	45.0091	49.8481	38.5472	33.7178	35.6993	33.4261
Zc3h7b-201	26.8216	30.0859	24.9411	27.4689	24.9145	24.614	18.6901	20.313
Tob2-201	102.806	102.195	96.0039	99.6074	79.3564	77.6239	66.4234	65.2266
Aco2-201	111.539	97.5535	123.638	103.07	89.4306	89.5038	76.5191	79.7887
Pmm1-201	123.521	124.879	106.583	107.895	89.3759	82.9425	83.6944	86.3573
Desi1-206	44.0903	35.3469	39.9612	40.9283	31.8006	33.9618	24.4164	23.4261
Snu13-202	19.6127	16.6929	11.6019	15.3286	24.58	24.1895	30.9686	28.9715
Srebf2-201	24.9208	24.2734	25.1421	23.1685	32.4922	33.1792	18.122	21.5817
Smdt1-201	63.8192	79.5543	58.1227	51.7594	58.7546	51.9234	62.6785	54.6288
Pacsin2-210	41.4794	33.5697	45.4773	35.6161	43.7514	43.8077	40.3073	39.7377
Sult4a1-201	50.9355	41.3802	32.125	35.1887	46.5845	42.7388	37.8968	43.4747
Atxn10-201	84.3348	78.468	70.8284	67.8243	83.2931	81.4414	60.3103	66.7402
Cerk-201	31.3673	31.2491	28.2906	30.5478	19.0699	18.1779	15.7524	17.1541
Mapk8ip2-201	30.7316	28.4016	21.5961	26.2615	33.0713	32.6667	22.5876	24.4191
Zcrb1-201	34.9883	45.871	25.3383	19.6715	14.996	16.5047	19.0865	19.3972
Slc48a1-201	37.7211	34.7621	29.9403	34.0964	39.609	34.8249	24.2326	24.8111
Tmem106c-202	44.2101	37.4606	34.6075	40.2418	38.931	36.3325	29.2437	26.4696
Pfkm-201	38.2584	34.7116	46.2717	41.7646	50.4287	49.2928	42.0203	38.7374
Ddx23-201	40.4974	36.4925	36.3252	37.5808	37.8218	33.9645	27.4916	30.0704
Arf3-201	35.7767	42.8019	36.1709	34.0966	40.4377	39.5112	27.559	29.921
Prkag1-201	40.3338	34.2589	41.283	34.3354	36.0437	34.7935	32.7712	31.4999
Tuba1b-201	506.734	511.041	472.662	469.996	460.621	438.509	442.667	447.406
Tuba1a-201	524.203	523.615	487.823	473.84	439.147	429.908	430.598	438.7
Tmbim6-201	176.332	160.156	174.949	155.833	180.841	169.096	123.548	134.683
Dazap2-201	56.5752	64.8862	48.0484	54.0904	60.4839	59.4449	53.1271	49.6383
Ankrd33-201	76.4548	70.2295	69.3672	55.1788	49.295	47.8463	46.1005	47.5835
Eif4b-201	83.5452	76.1102	60.2246	74.9451	66.1258	64.3918	55.4752	55.5034
Gm9918-201	21.1192	21.8882	22.8939	26.3062	23.4322	22.2983	26.2199	30.0304
Pcbp2-212	52.8955	55.937	47.5651	59.3108	211.447	220.958	128.605	135.864
Pcbp2-214	206.127	202.228	209.65	201.713	50.2007	44.8905	71.6782	82.8762
Pcbp2-219	67.7246	81.3634	70.2299	61.9543	49.8704	52.7339	51.8988	62.2678
Atp5g2-202	123.422	119.83	93.1406	112.924	103.98	95.5617	144.437	119.392
Smug1-202	29.6528	27.49	33.3794	35.3102	23.9814	23.3716	47.205	43.2632
Hnrnpa1-202	98.368	125.956	79.6053	99.1996	106.119	96.1326	112.877	87.1685
Hnrnpa1-204	11.7184	12.4443	20.7063	18.9966	26.8353	27.3154	39.9069	43.901
Copz1-201	44.4127	54.8811	42.4212	46.9445	48.5028	47.8756	42.7433	39.1815
Zfp385a-202	356.45	381.035	369.293	391.554	255.359	267.849	174.162	196.809
Naa60-211	27.5739	29.464	35.2606	31.1668	33.4901	34.1891	22.365	23.4926
Rogdi-207	67.195	56.1423	49.7864	64.6246	82.3855	74.3894	55.288	59.3805
Abat-201	20.7874	25.6475	17.5672	21.606	28.8373	31.0638	18.9243	18.0621
Bmerb1-201	24.3752	26.7075	28.0603	28.0391	33.956	34.437	24.2765	22.9505
Ube2l3-201	41.6965	40.3363	30.8017	36.5689	43.3828	45.0268	28.5123	28.7135
Septin5-201	67.0133	65.8574	53.677	64.7931	49.0473	54.2796	35.1493	37.102
Ufd1-201	35.3079	30.8579	24.601	21.058	28.3791	24.9609	23.1647	24.5889
A930003A15Rik-201	91.0153	73.5567	106.434	109.897	68.7583	63.9105	135.725	136.478
Ap2m1-202	214.747	201.203	164.87	182.07	175.496	166.561	131.546	130.273
Camk2n2-201	30.4087	33.8071	20.8226	22.434	28.9569	23.8863	16.5473	14.9775
Psmd2-201	60.0613	57.2378	47.3319	59.5526	56.0617	57.4566	45.0866	44.623
2510009E07Rik-201	35.721	33.6392	33.6001	28.1234	33.2483	34.3264	27.0877	27.7963
Dnajb11-201	38.5357	42.626	35.8044	33.0708	24.8274	24.3306	23.9031	24.0711
Ncbp2-201	31.0181	31.5283	30.8051	25.9119	31.917	35.5202	33.2504	30.7539
Rpl35a-201	226.256	245.693	253.838	206.026	141.729	129.882	247.342	271.146
E130310I04Rik-202	15.5212	18.6549	20.8262	21.6417	16.7502	18.8577	29.0208	32.2457
Atp6v1a-202	32.5357	37.7526	23.5976	28.2012	60.2644	58.2658	48.7684	45.3438
Atp6v1a-201	39.1067	38.79	33.6388	33.3315	29.291	32.5488	28.2423	31.4189
Tagln3-201	105.849	94.3673	81.2618	75.0448	69.7326	68.0082	69.9499	76.6466
Rpl24-201	217.191	251.923	240.176	226.874	184.472	181.424	249.066	261.108
Impg2-202	48.3967	56.7074	54.9769	50.814	52.6192	56.9503	58.0179	54.3179
Tfg-201	33.8019	28.6524	19.1683	20.32	34.3941	34.1898	30.1816	28.5474
Arl6-203	61.9608	55.474	102.689	80.2997	57.2807	57.0593	104.547	101.434
Jam2-202	26.7474	32.5641	38.8336	36.3437	32.8438	34.3707	40.1791	37.3923
Atp5j-201	77.0278	69.5794	80.0156	62.4886	68.866	67.1597	79.5801	84.2412
Sod1-201	231.234	202.358	195.502	208.217	147.336	152.014	164.717	192.118
Tmem50b-201	23.6038	29.002	31.1406	24.6134	38.6952	37.6293	29.4009	27.5969
Atp5o-201	157.402	159.898	132.045	156.336	111.217	107.016	142.268	155.528
Kcne2-201	38.6573	33.3377	37.4962	32.6663	24.0199	26.6255	31.5148	30.4165
Cbr1-201	33.3612	38.9513	33.0798	27.6395	30.807	30.8645	27.8207	28.6574
Ttc3-230	66.9527	55.7714	55.3347	54.6163	64.4761	72.3833	56.4429	53.6262
Hmgn1-201	386.937	418.169	301.026	353.493	246.074	226.567	268.947	263.131
Pcp4-201	241.011	239.027	165.888	184.728	154.767	171.814	227.901	235.47
Tmem242-201	24.9464	25.386	30.0351	24.6503	19.3346	17.1495	20.9909	21.0095
Rps6ka2-201	33.5205	30.6621	25.7987	26.2939	26.7603	24.0587	19.2061	21.5778
Mpc1-208	29.6232	31.827	22.9586	23.3561	40.6437	39.3058	49.9745	40.9738
Psmb1-201	44.6617	45.3025	32.6837	39.1345	36.1088	34.4258	49.006	48.0221
Ppp2r1a-201	141.282	142.341	108.1	112.67	146.18	135.31	96.2912	100.224
Paqr4-201	64.289	58.749	61.843	58.1864	52.1998	47.5765	41.3443	45.3007
Flywch1-204	52.2724	41.545	47.8532	44.0539	56.0175	50.7513	34.1659	34.9151
Srrm2-205	24.1947	28.4682	34.2023	35.062	48.4711	42.2219	43.8321	53.1306
Atp6v0c-201	396.418	418.198	442.316	382.565	490.901	466.722	365.266	374.368
Rps2-208	273.458	279.969	210.475	223.1	179.613	155.02	201.621	181.201
Ndufb10-201	120.103	114.164	117.858	115.698	79.2224	83.968	84.9929	89.7827
Hagh-202	72.0296	58.7358	55.0196	49.8642	42.6914	41.3917	51.2055	46.1766
Gnptg-201	37.5627	32.8069	44.0294	34.9511	32.0567	35.0194	38.6548	39.5585
Fbxl16-201	40.4828	39.2816	33.3765	36.1259	39.3562	31.7461	28.4167	22.4555
Jmjd8-201	30.4238	23.2868	25.6577	23.5765	20.8992	19.1116	18.2496	20.4651
Mrpl28-201	37.5331	42.0596	44.5404	43.7122	40.8208	34.6682	37.0455	41.5025
Phf1-201	23.185	18.7007	30.377	23.631	21.7622	18.1745	15.1076	14.9777
Uqcc2-201	96.4885	103.912	105.709	89.8143	90.0929	82.8618	99.4969	125.419
Pacsin1-201	77.3156	73.1352	51.5252	52.9044	63.7548	59.6025	30.4971	36.4474
Snrpc-201	47.0331	60.6733	30.5158	37.795	28.2795	24.7691	31.9662	38.2637
Tulp1-201	692.623	655.663	621.982	643.842	417.439	394.723	308.172	349.853
Glo1-201	55.0334	59.3758	56.3274	53.7765	79.2523	72.7585	79.926	75.6434
Glo1-203	51.5515	52.1227	31.4543	41.5084	9.45602	10.7458	11.0798	8.82467
Ndufv3-202	167.895	133.415	114.357	147.928	78.9791	64.8904	104.59	126.128
Ndufv3-201	37.6338	28.7487	33.6614	38.1018	27.8852	30.4985	25.1942	29.6878
Hnrnpm-202	44.632	46.8881	43.5496	41.6997	36.7925	39.7753	37.3199	32.5684
Rab11b-203	68.0449	55.9735	44.7228	58.0006	73.6421	66.9139	39.7639	41.0941
Rps28-205	304.591	246.527	216.768	263.856	104.368	95.0036	205	245.066
Ndufa7-201	123.397	106.03	112.159	102.973	81.981	77.077	123.484	151.987
Smim40-201	225.209	227.01	180.64	163.378	177.083	170.005	248.688	252.237
Brd2-202	46.6296	42.6289	38.8079	47.6239	45.8222	44.4483	32.4954	25.5976
Ppt2-209	28.1439	21.4683	38.4203	32.6817	29.7948	26.9888	22.1789	29.3502
Hspa1b-201	26.4292	22.283	44.4038	45.3217	27.5605	27.1669	27.1862	29.9491
Abhd16a-201	33.0723	30.3039	31.616	34.1893	34.3941	31.817	28.1053	35.175
Bag6-201	39.7217	40.9166	41.2031	40.652	43.1882	37.9534	28.7177	28.3323
Prrc2a-201	71.4316	69.4707	89.9029	79.7459	53.1306	56.175	44.7539	53.6357
Atp6v1g2-201	70.4986	74.6788	49.6172	59.9423	65.5351	62.9467	48.5304	50.7904
Ddx39b-201	76.8699	64.9433	80.6576	84.5654	78.7828	69.4832	72.1582	71.1493
Ddx39b-204	33.7944	40.1401	45.7387	47.8786	40.4294	42.7277	51.4126	52.3981
Ier3-201	39.0493	38.2741	40.7026	39.2897	46.9706	38.7651	44.4002	41.7598
Tubb5-201	150.898	142.683	142.243	143.869	133.382	128.962	119.508	115.792
Nrm-201	46.9434	39.788	40.9383	47.2503	38.8508	35.8452	40.1229	36.7218
Abcf1-201	44.6835	54.2615	39.8783	44.4061	37.838	34.3766	27.8288	31.9222
Gnl1-201	38.4257	43.0025	39.6114	42.1642	38.615	33.2196	24.8043	26.4894
Gabbr1-203	28.5507	29.8014	28.9234	27.7454	28.9164	32.979	24.3043	24.5041
Pla2g7-201	77.8437	86.1213	85.9675	88.452	74.9132	71.4261	81.9721	74.0935
Enpp5-201	60.8494	66.078	45.8879	39.5286	44.7485	46.1939	43.3067	42.406
Enpp5-202	23.0117	21.6401	23.5459	26.8236	29.6425	31.6165	30.1716	27.5834
Cdc5l-201	30.7822	31.8017	21.3475	27.944	24.8368	24.914	24.8457	21.6069
Hsp90ab1-201	246.58	248.744	218.964	227.37	224.698	214.522	161.95	165.451
Tmem63b-201	45.2423	50.6145	51.9699	51.0208	42.4752	40.1156	32.4718	35.9227
Vegfa-202	32.5853	30.0811	27.486	28.101	21.4552	24.7404	28.6787	24.4633
Mrps18a-201	27.2206	31.9535	24.1733	28.7413	21.5544	26.2221	23.8348	26.3554
Mrpl2-201	39.7402	34.3211	37.5395	29.207	22.9006	17.3966	22.4233	23.6737
Ppp2r5d-201	41.7861	34.9033	39.7597	34.7868	32.0291	34.1622	26.1234	24.411
Cnpy3-201	40.3758	33.0294	30.3824	35.0167	27.9512	32.434	27.4846	26.1937
Tbcc-201	40.2279	46.9134	39.0604	36.8284	30.5149	24.8704	37.5602	44.7969
Prph2-201	2360.1	2266.16	2429.87	2335.5	1965.56	1891.81	1889.77	1997.56
Prph2-202	109.531	137.857	282.481	246.132	141.191	173.93	320.337	338.206
Guca1b-201	815.74	783.117	822.782	838.241	780.884	742.959	759.595	857.67
Guca1b-202	69.9899	55.4436	81.9255	79.392	60.8951	64.3081	98.3609	106.204
Guca1a-201	1078.77	920.162	1175.85	1158.87	784.076	740.706	1313.75	1405.36
Rab5a-201	22.7146	26.7003	18.64	23.1342	31.6005	33.2043	27.7301	25.8346
Rpl36-201	291.292	259.329	289.951	235.867	185.209	175.818	222.496	252.565
Ranbp3-201	30.4957	31.9717	40.1399	37.7163	29.5435	29.1725	30.4107	31.6359
Clpp-201	45.109	40.7689	54.4046	46.5879	37.6085	34.7849	36.3788	38.9644
Gtf2f1-201	44.213	40.95	36.1122	37.2678	34.6792	30.0554	24.8495	27.5075
Khsrp-201	44.7955	39.7207	38.2029	43.4471	39.2822	38.7069	35.0018	36.6678
Tubb4a-201	105.88	109.595	85.7085	96.1567	91.0522	89.8236	52.5382	50.886
Pdzph1-201	52.0406	55.2625	73.349	80.7848	53.1668	57.3192	87.0903	79.3721
Ndufv2-203	26.4085	31.728	21.2998	25.8774	15.1946	14.0304	18.0722	22.9129
Pcare-201	112.127	111.246	119.57	117.014	90.1744	95.9577	102.35	107.03
Lbh-201	72.2806	64.7598	64.2773	64.0832	46.3956	45.6259	43.6716	44.6536
Cebpzos-202	37.5165	41.247	35.1193	27.4418	23.7385	26.4834	42.486	32.1194
Map4k3-201	33.6524	32.0542	39.5541	34.2287	25.4716	25.6753	29.6937	27.4417
Cox7a2l-201	191.875	186.179	142.558	150.811	112.217	111.419	137.398	142.878
Zfp36l2-201	57.0963	58.4835	44.9028	52.7672	53.6843	49.6214	39.2616	36.8016
Ppm1b-202	30.5667	24.5346	28.8012	27.736	34.4352	36.8987	29.5896	30.4454
Prepl-201	73.89	82.4566	68.2518	71.7604	81.3487	91.161	66.0975	64.7922
Epas1-201	44.235	43.9436	32.4862	35.8822	28.2354	30.6907	23.3643	23.9729
Calm2-201	190.91	180.042	177.054	167.465	269.845	267.052	373.654	357.142
Impact-201	32.1774	42.4915	24.9503	29.8833	56.7172	57.113	48.4956	47.0742
Mapre2-201	40.546	47.9983	44.5657	50.5774	56.536	58.6968	42.1439	42.175
Celf4-202	27.4822	32.5577	18.5649	19.5373	43.7808	41.2465	24.3047	26.9375
Rit2-203	37.9748	35.1207	45.1894	34.1286	61.6399	62.027	68.4442	65.643
Bin1-201	79.5431	84.2156	76.6039	81.5248	77.5587	73.0208	71.7121	80.1238
Bin1-204	34.7859	32.8317	44.2881	44.0527	45.9086	41.2201	53.0065	59.9217
Nrep-202	77.9827	77.8691	60.2142	52.2306	63.6496	63.5571	56.465	54.3778
Reep5-201	44.7982	40.2426	28.1175	32.5365	49.8168	52.9958	38.2728	41.3825
Kdm3b-201	39.7962	35.9626	36.7364	45.492	28.3015	29.9022	30.0226	32.306
Reep2-201	29.3773	32.2442	33.3148	25.1349	36.8841	36.4332	21.3933	24.5499
Hspa9-201	56.8735	60.1343	55.584	54.1474	51.6247	52.771	49.3712	46.8352
Ctnna1-201	38.0585	40.4564	44.2727	42.1953	27.0469	26.1589	22.2007	22.3322
Paip2-201	49.9839	66.1968	64.0381	51.0025	76.736	67.7685	92.8108	91.1547
Ube2d2a-202	28.0595	31.353	38.4309	29.765	47.3514	45.6772	44.2969	37.4712
Ndufa2-201	114.111	90.208	95.1851	100.992	85.451	76.4658	105.288	128.843
Ik-201	84.3893	89.0486	87.2424	96.9089	66.5637	65.4764	67.4123	62.3589
Hars-201	32.5488	28.0955	29.2308	29.2538	24.9386	24.3632	20.4214	19.735
Zmat2-201	31.0971	32.2256	32.3283	26.5918	27.2112	24.1107	27.3889	25.7062
Rnf14-201	52.4327	46.4922	37.3527	28.6328	45.5097	51.9266	44.377	44.3149
Dpysl3-204	65.0255	61.3167	46.4704	53.4807	44.9072	44.5283	42.6752	44.0173
Cep120-201	31.418	28.0687	30.8375	30.203	32.0852	33.2584	29.4951	30.3827
Rps14-201	375.039	322.491	353.563	336.789	197.223	186.058	417.634	451.138
Pde6a-201	844.808	847.199	874.233	909.745	559.328	606.903	653.46	652.158
Napg-201	15.249	19.2113	18.3707	20.5039	36.8118	35.1686	30.2565	28.9404
Rax-201	81.4354	79.9571	74.2022	71.195	70.4199	54.3889	48.7963	51.7876
Cplx4-201	305.745	299.799	261.932	299.211	239.917	243.41	301.925	296.694
Rpl17-201	339.327	355.397	284.531	339.102	182.925	180.949	295.206	303.894
Atp5a1-201	293.294	319.871	239.636	245.038	254.592	245.603	226.436	229.088
Gm16286-202	25.4689	28.1141	35.052	28.9504	30.3958	32.9061	25.6297	30.3861
Cndp2-201	36.3533	27.462	22.1552	22.5457	26.5226	24.7406	16.0372	17.9335
Cpt1a-201	54.2336	49.6052	65.2057	62.7777	49.0309	52.9423	50.5558	50.7255
Ndufs8-205	62.837	61.0538	52.534	66.2193	40.4927	42.7622	69.7829	79.9906
Gstp1-201	104.707	118.556	130.349	143.017	141.647	122.008	126.394	133.073
Cdk2ap2-201	68.484	53.0644	84.4073	81.5156	66.3519	66.6235	70.1247	78.952
Pitpnm1-211	76.3933	65.3691	81.0219	78.6853	69.0852	71.196	110.722	119.746
Pitpnm1-209	30.557	25.4936	27.9011	27.0873	32.0591	32.6078	39.4985	37.6382
Aip-201	52.2776	51.6745	33.6671	38.5973	35.3122	33.1051	39.5908	47.7191
Cabp4-201	169.901	186.514	205.836	232.17	119.887	108.548	153.732	160.592
Gpr152-201	42.6147	34.1339	55.2301	61.2439	39.0699	39.1466	44.6392	45.6494
Ppp1ca-201	71.2846	77.8825	82.2977	82.0555	80.0741	75.6934	68.5404	90.2025
Ctsf-201	116.126	95.7682	70.6392	76.5694	68.043	65.2639	53.3842	50.9893
Peli3-201	35.9484	34.5869	40.6127	41.5302	28.8493	26.8729	28.2954	29.0246
B4gat1-201	30.1434	26.5976	25.0042	22.0485	27.5705	26.635	21.1702	20.5654
Rab1b-201	57.1449	59.676	57.3973	56.9788	61.3318	55.213	46.9322	56.6138
Sf3b2-201	145.202	127.294	102.324	115.85	94.9736	96.1965	73.9678	73.4083
Drap1-209	78.0519	75.4387	70.2281	55.5547	39.6444	33.4385	45.3708	48.4398
Cfl1-202	19.289	23.0677	33.0278	25.9838	33.0813	33.5964	26.7775	22.3755
Cfl1-201	249.418	220.293	177.776	180.834	170.487	162.54	166.151	167.511
Malat1-201	97.4939	112.467	136.804	112.882	137.174	126.127	273.897	269.591
Fau-202	122.875	125.18	122.659	122.807	136.835	122.855	187.231	194.257
Fau-208	232.233	244.997	215.893	217.753	107.943	123.555	122.263	150.096
Ppp2r5b-201	38.8978	35.8881	34.6137	38.2269	33.9518	31.9026	26.6811	24.8353
Pygm-201	38.6335	38.9234	38.4818	44.875	42.4453	41.5685	24.193	23.2534
Prdx5-201	73.5522	84.2378	72.3246	68.2271	68.9273	63.2488	71.6986	74.6825
Stip1-201	77.2131	65.1368	85.7616	74.2512	62.2902	60.9527	53.1968	54.2338
Otub1-201	44.0402	40.7778	47.5764	41.5359	47.0924	41.0246	31.1942	32.1978
Rtn3-203	85.7089	92.9472	93.0685	80.1022	175.279	164.776	115.529	94.9492
Rtn3-201	66.3857	59.7489	70.7567	73.3305	43.8447	53.4214	46.4707	56.13
Hnrnpul2-201	64.1133	58.3991	48.7155	57.1304	53.4366	52.6081	47.5036	44.8511
Gng3-201	56.9998	50.5216	41.4399	52.883	56.5361	53.3698	36.6554	43.5698
Uqcc3-201	84.9756	74.9591	94.4215	79.2136	46.7953	42.543	60.6662	70.0115
Lbhd1-201	102.475	109.838	106.301	109.679	75.7352	74.9202	102.83	96.2601
B3gat3-201	37.4728	45.5481	41.4813	33.6239	38.502	37.362	33.3348	37.3405
Rom1-201	1847.23	1750.74	1823.75	1730.6	1376.59	1320.13	1356.74	1518.25
Mta2-201	54.8042	54.2399	65.6796	63.051	47.9953	46.7063	50.2385	53.1842
Eef1g-201	131.789	141.692	129.063	129.799	120.888	114.342	96.9598	99.1419
Fth1-201	642.333	634.018	559.948	558.8	465.161	402.956	423.175	396.768
Fads2-201	34.066	26.8856	18.3128	23.3842	25.3134	24.141	15.5516	14.6248
Ddb1-201	122.117	134.792	139.858	128.592	129.519	132.669	127.319	122.189
Prpf19-201	54.9948	49.4341	47.4051	50.6126	50.4188	54.1645	49.8609	51.0479
Stx3-203	245.421	258.356	367.332	322.771	217.125	226.136	292.012	285.371
Klf9-201	46.6024	46.5885	26.6808	26.8151	32.1792	31.4946	25.8847	24.6487
Vldlr-207	30.6629	30.1407	43.4713	34.2292	37.3765	39.1867	40.039	40.5357
Kcnv2-201	112.898	111.607	135.874	119.806	110.934	116.572	134.277	134.682
Tnks2-201	30.5512	30.5797	25.1148	31.7978	34.3692	36.7376	36.0142	33.6008
Tm9sf3-202	22.4928	20.99	14.3785	18.8334	23.6837	26.1063	30.8147	28.1317
Pgam1-201	465.922	486.977	486.842	520.752	515.675	491.468	345.527	344.245
Got1-201	136.23	131.68	142.745	162.246	165.799	169.819	145.096	147.709
Scd2-201	68.8448	79.6072	68.1161	72.1452	93.9304	86.8718	57.7014	55.6777
Ndufb8-201	161.545	181.829	135.814	172.826	120.002	105.197	170.505	178.38
Oga-201	24.3764	24.6819	24.8932	25.5965	36.8596	35.6749	29.258	29.4291
Actr1a-201	59.5732	61.3066	68.6859	68.7185	66.7079	63.6482	53.5813	58.9239
Arl3-201	267.14	264.008	228.545	210.726	177.751	184.519	180.859	180.864
Ina-201	38.5394	36.9027	24.8205	26.5426	30.1716	31.6931	23.3388	22.567
Sfr1-201	55.1623	50.5255	32.8238	38.1125	35.6224	38.2333	33.1315	35.5816
Smc3-201	34.0526	35.5995	30.4491	29.3777	29.4377	29.8816	24.8299	23.0772
Hspa12a-201	34.1601	39.6142	35.2951	32.5213	45.0773	46.0967	30.4784	29.2437
Eif3a-201	27.4561	34.1937	32.5139	27.4194	27.8033	27.9156	24.3932	22.8743
mt-Rnr1-201	298.153	372.072	351.233	294.62	674.68	590.011	1377.45	1474.16
mt-Rnr2-201	509.496	672.985	722.122	674.564	1130.33	1020.18	1975.32	1922.93
mt-Nd1-201	4345.87	5024.87	4863.81	4132.35	4464.98	4632.95	4888.8	4631.07
mt-Nd2-201	2456.28	2886.52	2358.45	1953.54	2189.62	2337.15	2827.76	2605.08
mt-Co1-201	6521.5	7161.03	9545.42	7455.04	9566.2	10200.8	9345.77	9099.33
mt-Co2-201	549.393	614.082	926.193	832.328	2577.37	2185.17	1419.21	1307.86
mt-Atp8-201	1857.73	2097.22	1349.22	1231.11	2380.75	2214.48	3873.72	4176.96
mt-Nd4-201	2386.5	2829.45	3191.18	2481.21	3168.27	3511.17	3125.92	2990.82
mt-Nd5-201	1798.55	2091.39	2430.63	2045.42	1815.73	2143.14	1952.14	1831.8
mt-Nd6-201	18.7963	16.0133	20.1488	26.6932	207.908	177.643	49.3932	50.6927
mt-Cytb-201	6776.24	7881.25	7813.23	6994.62	6623.9	7067.4	6535.19	6074.47

## Sheet: Supplementary Table 2
Supplementary Table 2. Transcript list of chromatin remodeler.
DNA-modification	Euchromatin	Heterochromatin	Histone-Binding	Nucleosome-Assembly
Gstt1-201	Sp1-201	Uba1-201	Scmh1-201	Cabin1-201
Kmt2a-201	Trim28-201	Baz1b-201	Pwp1-201	Hira-201
Dnmt1-201	Ctnnb1-201	Dnmt1-201	Kmt2a-201	Macroh2a1-201
Trim28-201	Dnmt3a-201	Trim28-201	Supt6-201	H3f3b-201
Ctcf-201	Prdx1-201	Macroh2a1-201	Baz1b-201	H2bc4-201
Ehmt2-201	Cbx3-201	Ube2a-201	Brd4-201	Sart3-201
Ppm1d-201	H1f2-201	Top2b-201	Hira-201	Dnajc9-201
Dnmt3a-201	H2az1-201	Suz12-201	Pkn1-201	Brd2-201
Gsk3b-201	Ogt-201	Hdac2-201	Vps72-201	Smarca2-201
Prmt5-201	Setd1a-202	Ube2b-201	Anp32e-201	Hat1-201
Parp1-201	Polr2a-201	Dnmt3a-201	Suz12-201	Hp1bp3-201
Bmi1-201	Polr2a-202	Tasor-201	Sart3-201	H1f2-201
Exosc3-201	Rnf2-201	Kdm4b-201	Usp15-201	Smarca5-201
Atf7ip-201	Rrp1b-201	Ring1-201	Yeats4-201	Kat6a-201
Parp2-201	Creb1-202	Uhrf2-201	Sap30l-201	Tspyl2-201
Alkbh3-201	Cbx3-202	Orc2-201	Dek-201	Ipo4-201
Baz2a-201	Rbmx-201	Bmi1-201	Ctsl-201	Tspyl4-201
Apex1-201	Smarca4-202	Rnf20-201	Dnajc9-201	Hjurp-201
Bmi1-202	Nsmf-203	Kdm4c-201	L3mbtl2-201	Nap1l5-201
Rlf-201	Nsmf-204	Psip1-201	Glyr1-201	Tspyl1-201
Cdadc1-202	Prdx1-202	Cenpc1-201	Kmt2d-201	Nap1l1-201
Exosc4-201	Jun-201	Cbx3-201	Chd1-201	Set-201
Trex1-201	Ruvbl2-201	Aldoa-201	Phf10-201	Nap1l4-201
Fto-201	Setd5-202	Rnf40-201	Brd2-201	Npm1-201
Prmt7-201	Setd5-203	H2az1-201	Cxxc1-201	H2bu2-201
Gsk3a-201	Cbx3-204	Nop53-201	Uhrf2-201	Daxx-201
Ehmt2-202	Rbmx-202	Baz2a-201	Smarca2-201	H3f3a-201
Exosc5-201	Rbmx-203	Bmi1-202	Smarcc2-201	Npm1-202
Usp9x-201	Ogt-202	Sirt2-201	Usp16-201	Brd2-202
Tet3-202	Trnp1-201	Mbd2-201	Ncl-201	Hp1bp3-202
Tdg-201	Trim28-203	Rnf2-201	Fh1-201	Smarca4-202
Kmt2e-201	Trim28-204	Zbtb18-201	Hat1-201	Npm1-203
Mta2-201	Trnp1-202	Kdm4c-202	Rnf20-201	Rbbp4-201
Smarca4-202	Rrp1b-202	Daxx-201	Dnajc2-201	Anp32b-201
Mecp2-202	Prdx1-204	Phc1-201	Ing4-201	Npm1-204
Pik3ca-202	Rrp1b-204	Rrp1b-201	Kat8-201	Atrx-202
Pik3ca-203	Rbmx-205	Aldoa-202	Rbbp7-201	Nap1l2-201
Gnas-205	Rrp1b-205	Tcp1-201	Coprs-201	Set-203
Gnas-206	Tbp-206	Cbx7-201	Tnks-201	Macroh2a1-203
Gnas-207	Ogt-203	Cenpb-201	Brd7-201	Hp1bp3-209
Gnas-208	Ogt-204	Sumo1-201	Carm1-201	H3f3b-203
Trex1-202	Prdx1-205	Mbd3-201	Phip-201	Macroh2a1-204
Alkbh2-202	Ogt-207	Cbx1-203	Phf2-201	H3f3b-204
Ehmt2-204	Ctnnb1-210	Cbx3-202	Hpf1-201	Rbbp4-203
Kmt2a-202	H2az1-204	Smarca4-202	Ipo9-201	Macroh2a1-206
Gsk3b-202	H2az1-205	Mecp2-202	Psme4-201	Set-206
Mphosph8-201	H2az1-206	Hdac1-201	Wdr5b-201	Brd2-207
Trim28-203	Smarca4-204	Mbd3-202	Wdtc1-201	H3f3a-202
Meg3-201	H2az1-207	Mbd3-204	Smarca5-201	Ubn2-205
Ehmt2-206	Ctnnb1-214	Phc2-202	Kat6a-201	H3f3a-205
Trim28-204	H1f0-201	Aldoa-203	Tspyl2-201	H3f3a-207
Meg3-202	Rnf2-202	Kdm4a-204	Jarid2-201	Smarca4-204
Meg3-203	Trim28-210	Psip1-202	Mllt6-201	Smarca2-204
Meg3-204	Ctnnb1-215	Psip1-203	Kmt2c-201	Smarca2-206
Ctcf-202	Hsf1-214	Kmt5c-202	Baz2a-201	Smarca2-209
Meg3-205		Kmt5c-203	Atad2b-201	Smarca2-215
Bmi1-203		Ube2b-202	Ptma-201	H1f0-201
Mta2-202		Cbx7-202	Phf8-201	Naa60-211
Usp9x-203		Cbx7-203	Kdm5b-201	Atrx-222
Kmt2a-204		Cbx6-202	Tspyl4-201	Nap1l5-202
Fto-205		Cbx6-203	Wrap53-201	Nap1l4-206
Meg3-207		Phc1-203	H2ax-201	Tspyl4-202
Tdg-206		Atrx-202	Hjurp-201	Nap1l1-202
Meg3-209		Cbx3-204	Bptf-201	Nap1l1-203
Usp9x-205		Hmga1-201	Nap1l5-201	Nap1l1-205
Ctcf-206		Suv39h1-202	Pygo2-201	Asf1a-204
Gnas-221		Mphosph8-201	Tspyl1-201	Ubn1-203
Usp7-206		Hmga1-203	Zmynd11-201	Ubn1-207
Usp7-207		Cbx5-202	Prkcb-201
Usp7-208		Sirt2-202	Sbno1-201
Meg3-211		Trim28-203	Nap1l1-201
Baz2a-202		Trim28-204	Set-201
Mecp2-205		Mbd3-205	Npm3-201
Otud4-201		Rrp1b-202	Nap1l4-201
Otud4-202		Suv39h2-204	Phf1-201
Otud4-203		Mbd2-204	Npm1-201
Smarca4-204		Kmt5c-205	Brd3-202
Tdrkh-203		Bmi1-203	Ssrp1-201
Tdrkh-208		Aldoa-204	Daxx-201
Trim28-210		Cbx1-204	Phc1-201
Baz2a-208		Aldoa-205	Ipo7-201
Gnas-225		Uba1-204	Pih1d1-201
		Macroh2a1-203	Anp32a-201
		Uba1-205	Tbl1x-201
		Rrp1b-204	Cbx7-201
		Phc2-208	Chd8-201
		Macroh2a1-204	Npm1-202
		Aldoa-206	Kmt2e-201
		Macroh2a1-206	Brd2-202
		Mbd3-206	Spin1-201
		Aldoa-208	Smarca4-202
		Cbx8-203	Zmynd8-203
		Psip1-206	Smarcc2-202
		Rrp1b-205	Brd9-201
		Aldoa-209	Uimc1-202
		Ube2b-204	Thap7-201
		Aldoa-210	Npm1-203
		Tcp1-209	Rbbp4-201
		Tcp1-210	Anp32b-201
		Sirt2-208	Smarcc2-203
		Top2b-202	Wdtc1-202
		Top2b-204	Phc2-202
		Phc1-208	Scmh1-203
		Phc1-211	Kdm4a-204
		Top2b-205	Ezh1-202
		Suz12-206	Ezh1-203
		Baz2a-202	Pygo2-202
		Sirt2-209	Mllt6-202
		Mecp2-205	Kat7-204
		Ddx6-201	Kat7-205
		H2az1-204	Samd7-201
		H2az1-205	Kmt5c-202
		H2az1-206	Kmt5c-203
		Smarca4-204	Zmynd8-205
		H2az1-207	Npm1-204
		Rnf2-202	Brd1-202
		Zbtb18-206	Brd1-203
		Zbtb18-210	Cbx7-202
		Zbtb18-212	Cbx7-203
		Atrx-222	Zmynd11-202
		Nop53-203	Zmynd11-203
		Nop53-204	Zmynd11-206
		Ube2a-207	Zmynd11-207
		Ube2a-208	Kdm5b-203
		Ube2a-209	Rbbp7-202
		Rnf40-203	Rbbp7-203
		Rnf40-206	Ing4-202
		Eed-203	Phc1-203
		Eed-207	Atrx-202
		Trim28-210	Kat5-201
		Ncapd3-203	Brd3-203
		Ncapd3-204	Wdr5-201
		Ncapd3-205	Snca-201
		Ddx6-203	Fmr1-206
		Baz2a-208	Kmt2a-202
		Mbd1-204	Carm1-202
		Hsf1-214	Phf14-203
		Hmga1-211	Glyr1-202
		Hmga1-214	Mphosph8-201
		Hmga1-216	Cbx5-202
			Dpf2-202
			Taf1-202
			Brd4-203
			Nap1l2-201
			Dpf2-203
			Sgf29-203
			Ing2-202
			Set-203
			Anp32a-202
			Anp32a-204
			Pwwp2a-204
			Dek-202
			Kmt5c-205
			Ssrp1-204
			Trp53bp1-210
			Dek-203
			Brd7-203
			Anp32a-206
			Zmynd11-212
			Kmt2a-204
			Dek-204
			Phc2-208
			Rbbp4-203
			Dpf3-202
			Cbx8-203
			Dpf3-203
			Cbx4-202
			Ssrp1-207
			Bcas3-214
			Anp32a-209
			Hpf1-204
			Set-206
			Hpf1-205
			Mpnd-204
			Zmynd8-218
			Zmynd8-219
			Brd2-207
			Bcas3-216
			Anp32a-210
			Mpnd-207
			Phc1-208
			Phc1-211
			Ipo9-208
			Ipo9-214
			Suz12-206
			Anp32e-202
			Anp32e-203
			Phc3-209
			Sbno1-202
			Chd2-203
			Baz2a-202
			Mcm3ap-201
			Anp32e-210
			Rnf8-206
			Kmt2c-202
			Jarid2-208
			Smarca4-204
			Kmt2c-208
			Smarca2-204
			Smarca2-206
			Smarca2-209
			Smarca2-215
			Fh1-205
			Dpf3-206
			Dpf3-207
			Noc2l-201
			Samd11-201
			Ncl-202
			Ptma-202
			Apbb1-202
			Stat1-206
			Apbb1-203
			Srcap-207
			Rbbp5-203
			Apbb1-209
			Ptma-204
			Srcap-214
			Rbbp5-207
			Apbb1-217
			Apbb1-219
			Kmt2d-204
			Atrx-222
			Sbno1-216
			Chd2-212
			Morc3-206
			Nap1l5-202
			Prkcb-208
			Nap1l4-206
			Chd2-218
			Ing1-202
			Ing1-203
			Pih1d1-205
			Pih1d1-206
			Tspyl4-202
			Ncapd3-203
			Ncapd3-204
			Ncapd3-205
			Nap1l1-202
			Samd11-202
			Samd11-203
			Samd11-204
			Nap1l1-203
			Atad2b-203
			Nap1l1-205
			Asf1a-204
			Samd11-205
			Samd11-207
			Usp15-208
			Samd11-208
			Baz2a-208
			Brd9-206
			Ctsl-204
			Ctsl-206
			Ctsl-207
			Brd4-208
			Rnf8-210
			Kat5-202
			Kat5-209
			Kat5-212
			Phf1-205

## Sheet: Supplementary Table 3
Supplementary Table 3. Differentially expressed genes in Kdm3b heterozygous.
Up in Kdm3b heterozygous	Down in Kdm3b heterozygous
1110013H19Rik	1700001O22Rik
1110038F14Rik	1700029B24Rik
1600002K03Rik	1700030F04Rik
1700001J03Rik	1700086O06Rik
1700020D05Rik	1700110K17Rik
1700102P08Rik	2900064F13Rik
1700112J16Rik	4833439L19Rik
1700119H24Rik	4930419G24Rik
1810009A15Rik	4930451G09Rik
1810044D09Rik	4930500F10Rik
2310061I04Rik	4930579G18Rik
2810039B14Rik	9330159M07Rik
2900076G11Rik	9430041J12Rik
2900093K20Rik	A330102I10Rik
4833412K13Rik	Abcb1a
4833428L15Rik	Acot7
4930451E10Rik	Acp1
4930526A20Rik	Ankrd12
4930581F22Rik	Ankrd50
4930581F22Rik	Anks1
4930581F22Rik	Apc2
4933406J10Rik	Arfgef1
4933429O19Rik	Arfrp1
5330439A09Rik	Arhgap24
8430422M14Rik	Arl6
9230112J17Rik	Arpc2
A730011C13Rik	Arrb1
AA413626	Atp1b3
Abcb8	Atp2b1
AC149090.1	Atp6v1g2
AC149090.1	B230354K17Rik
Acad8	B3galt1
Acin1	Bbip1
Aco2	BC030500
Acp6	Bcan
Acrbp	Bicdl1
Adal	Bloc1s1
Adcy6	Bloc1s2
Adprhl2	Bmp5
AI413582	Bnip2
Aifm2	Bola3
Akr1a1	C230038L03Rik
Alas1	Cabp1
Aldh3b1	Cacna1d
Aldoa	Camk1
Aldoa	Cbl
Aldoc	Ccar1
Alkbh6	Ccdc134
Aloxe3	Ccdc136
Amy1	Ccdc82
Amy2a2	Ccdc97
Amy2a3	Ccz1
Amy2a4	Cebpzos
Amy2a5	Cep170b
Anapc1	Cep19
Anapc4	Cfap20
Ank2	Chordc1
Ankrd66	Chtop
Aox1	Cidea
Ap1b1	Col4a3
Ap2m1	Col4a4
Ap3d1	Col8a1
Ap5z1	Col8a2
Ap5z1	Commd2
Apoe	Cox4i1
Apopt1	Cox7a2
Appl2	Cpox
Arhgap10	Creb3
Arhgdig	Csnk1d
Arhgef33	CT010467.1
Arl3	Cyp26a1
Arl9	D130017N08Rik
Arnt	D930015M05Rik
Arpc1a	Dcakd
Arr3	Ddr1
Arrdc1	Dffa
Arrdc2	Dlat
Arrdc2	Dnajb1
Atad3a	Dnajc19
Atf6b	Dnm1
Atp13a1	Dock7
Atp5e	Dpm2
Atp5mpl	Dtx1
Atp5mpl	Efhd1os
Atp6v0b	Eif4g2
AW047730	Eif4g2
B230220B15Rik	Elmo1
B230303O12Rik	Eml3
Baz2b	Epn1
BC002059	Ercc4
BC031181	Ergic2
BC051226	Erich5
Bccip	Fam126a
Bloc1s2	Fam171b
Brd9	Fam220
Brf1	Fam227a
Brwd1	Fars2
Bst2	Fgf12
Bud23	Fgf13
C230035I16Rik	Fpgt
C230037L18Rik	Fyttd1
C4bp	Gabbr1
C87436	Gad1
C920021L13Rik	Gas2l1
Cacna1f	Gba
Cacna1h	Glcci1
Cacna2d4	Gm10247
Calu	Gm10532
Caly	Gm11175
Camkv	Gm11646
Camsap1	Gm11745
Capns2	Gm12371
Caprin2	Gm12712
Catsper2	Gm12895
Catsper4	Gm12896
Cbfb	Gm13063
Cbr3	Gm13243
Cbx1	Gm13502
Cc2d1b	Gm13597
Ccdc87	Gm13991
Ccdc88c	Gm14017
Ccdc9	Gm14167
Ccdc9	Gm14205
Ccl27b	Gm14291
Ccndbp1	Gm14388
Ccs	Gm14964
Cct4	Gm15347
Cct8	Gm15559
Cd81	Gm15663
Cdc123	Gm15784
Cdc42bpb	Gm17195
Cdk10	Gm17231
Cdk16	Gm17344
Cdk2ap1	Gm17484
Cdk3	Gm18541
Cdk5rap1	Gm18562
Cdkl3	Gm18646
Cenpo	Gm19918
Cep164	Gm2058
Cep57	Gm20652
Cep57	Gm20784
Cep85	Gm21178
Cercam	Gm21378
Cfap157	Gm21941
Cfp	Gm22500
Chchd7	Gm22571
Chd3	Gm22661
Chka	Gm23084
Chkb	Gm23711
Chmp2a	Gm23935
Chpf2	Gm24157
Chpt1	Gm24265
Cic	Gm24336
Cic	Gm24447
Cirbp	Gm25555
Cirbp	Gm26315
Clasrp	Gm26347
Clasrp	Gm26448
Clcn2	Gm26461
Clcn7	Gm26679
Clk3	Gm28402
Clk3	Gm2981
Cmc4	Gm2986
Cnbd2	Gm31282
Cnga1	Gm31513
Cnot1	Gm33497
Cnot7	Gm33869
Cnot8	Gm3470
Cnpy3	Gm35013
Col11a2	Gm37164
Col5a3	Gm37270
Commd4	Gm37539
Cops3	Gm3788
Coro7	Gm37980
Cox5b	Gm3851
Cox5b	Gm3888
Cp	Gm40849
Cplane1	Gm4152
Cpsf3	Gm41793
Crabp2	Gm42064
Crat	Gm42418
Creld1	Gm42778
Cspp1	Gm43148
CT010467.1	Gm43593
Ctc1	Gm43622
Cttn	Gm43966
Cxxc1	Gm44126
Cxxc1	Gm4419
Cym	Gm44450
Cyp46a1	Gm44471
Cyp4f13	Gm44532
D230022J07Rik	Gm44722
D730003I15Rik	Gm44899
Dapk1	Gm44954
Dcdc2b	Gm45760
Dcst2	Gm45822
Ddx1	Gm46210
Ddx47	Gm46430
Ddx52	Gm47204
Dedd2	Gm47210
Dennd1a	Gm47283
Dffb	Gm47393
Dhrs1	Gm47441
Dhx16	Gm48573
Dhx16	Gm48893
Dlg1	Gm48949
Dlg4	Gm49077
Dmac2	Gm49092
Dmd	Gm50244
Dnajc11	Gm50251
Dnajc14	Gm5456
Dnajc17	Gm5527
Dnhd1	Gm5597
Dnmbp	Gm5619
Dnttip2	Gm5814
Donson	Gm5853
Dpf2	Gm5977
Dpm1	Gm6104
Dqx1	Gm6180
Dstyk	Gm6335
Dus2	Gm6611
Dusp7	Gm6829
Dynll1	Gm7292
E130310I04Rik	Gm7591
E230016M11Rik	Gm8170
Ebna1bp2	Gm8566
Ecpas	Gm8775
Edem2	Gm9029
Edem2	Gm9030
Edn2	Gm9045
Eef1a1	Gm9049
Eif1	Gm9855
Eif3b	Gm9954
Eif3d	Gnb1
Eif3g	Gpr26
Eif4a2	Gprin3
Eif4a3	Gstt2
Enkur	Gtf2a2
Eno1	H1f1
Eno1	H2ac13
Eno1	H2ac7
Epha2	H3c11
Eps8l1	H4c1
Ercc1	H4c2
Ergic3	H4c3
Eri3	Hibadh
Ermard	Hjurp
Ermard	Hmgb1
Etaa1os	Hmgb1
Etnppl	Hmgb1
Exoc1	Hnrnpdl
F630040K05Rik	Hs3st3a1
Faap100	Hsp90aa1
Faim	Htr1b
Fam13b	Impg1
Fam151b	Impg2
Fam160a2	Irf6
Fam193b	Itgb8
Fam228b	Ivns1abp
Fam50a	Kcna1
Fam83f	Kcnab2
Fancc	Kcnh2
Fance	Kcnh2
Farp1	Kcnj2
Farp1	Kcnj6
Farsa	Kcnq2
Fbl	Kdm2a
Fbrsl1	Kdm3a
Fbxl12	Kdm6bos
Fbxo4	Kif1bp
Fdxr	Kitl
Fis1	Lamtor3
Fkbp10	Ldha
Flcn	Lin7c
Flot1	Lrat
Fndc1	Lurap1
Fndc1	Lysmd4
Folh1	Lyve1
G0s2	M6pr
G6pc3	Man2a1
Gabpa	Map3k1
Gabpa	Mcu
Gadd45b	Metap2
Gadd45g	Mettl27
Gale	Mettl6
Galnt11	Mia3
Gapdh	Micu3
Gbf1	Mir1188
Gcdh	Mir124a
Gcn1	Mir124a
Ginm1	Mir23b
Glb1l	Mir433
Glt8d1	Mir7669
Gm10012	Mitd1
Gm10030	Mob4
Gm10434	Mrps16
Gm10544	Msi1
Gm10544	Msmo1
Gm10715	mt
Gm10717	mt
Gm10717	Mta3
Gm10717	Myadml2
Gm10717	Myo5a
Gm10717	Myt1
Gm10717	Ndrg4
Gm10717	Ndrg4
Gm10717	Nefm
Gm10717	Nlgn2
Gm10718	Nrn1
Gm10719	Nubp1
Gm10719	Nxpe3
Gm10719	Nxph2
Gm10720	Pappa2
Gm10721	Pard6a
Gm10722	Pbx2
Gm10766	Pcdhac2
Gm10800	Pcdhb9
Gm10801	Pde4a
Gm10941	Pex10
Gm11168	Pex13
Gm11168	Pgm1
Gm11168	Phactr3
Gm11168	Pigp
Gm11192	Pih1d1
Gm11517	Pik3ap1
Gm11628	Pla2g2f
Gm11702	Plekhb1
Gm11790	Plpp7
Gm11843	Plxdc2
Gm12207	Pmel
Gm12405	Pou4f1
Gm12406	Pou4f1
Gm12447	Pou4f2
Gm12486	Pou6f2
Gm12689	Ppil2
Gm12842	Ppp1r3f
Gm12940	Ppp1r9b
Gm13029	Prr7
Gm13054	Psmb2
Gm13091	Pwwp2a
Gm13135	R3hdml
Gm13136	Rasd1
Gm13245	Rb1
Gm13259	Rbfox1
Gm13601	Rbm20
Gm13783	Rbms3
Gm13830	Rlbp1
Gm14407	Rn7s1
Gm14413	Rn7s2
Gm14502	Rn7s6
Gm14756	Rn7sk
Gm15432	Rnf13
Gm15627	Rnf25
Gm15635	Rpain
Gm15723	Rpl31
Gm15751	Rpl37a
Gm15832	Rpl39
Gm16048	Rpn1
Gm16075	Rprml
Gm16302	Sav1
Gm16306	Sbno2
Gm16312	Scamp4
Gm16415	Scarna2
Gm17115	Sccpdh
Gm17178	Scg2
Gm17180	Scg5
Gm17224	Scn2b
Gm17535	Scn7a
Gm17922	Sdha
Gm18890	Senp3
Gm19366	Serpine3
Gm20072	Sh3glb2
Gm20219	Siah1b
Gm20274	Sirt2
Gm20501	Ska2
Gm20501	Slc15a2
Gm20605	Slc15a2
Gm20636	Slc15a2
Gm20650	Slc15a2
Gm21738	Slc16a9
Gm21742	Slc25a12
Gm21887	Slc46a1
Gm22027	Slmap
Gm22634	Slmap
Gm22771	Snapc1
Gm23264	Snapc4
Gm24092	Snhg14
Gm24494	Snora73a
Gm24894	Snord42b
Gm25076	Snord58b
Gm25107	Snrpb
Gm25411	Snx18
Gm2573	Snx32
Gm2614	Sostdc1
Gm26232	Sox4
Gm26513	Spc25
Gm26532	Spin1
Gm26590	Spns1
Gm26917	Srp54b
Gm27893	Srrm1
Gm29427	Srsf10
Gm29560	Ssbp2
Gm29793	Ssbp3
Gm3052	St6galnac4
Gm3219	St6galnac6
Gm33195	St8sia3os
Gm33373	Stard7
Gm33460	Sult1c1
Gm33727	Sult4a1
Gm33732	Syngr3
Gm34248	Taok3
Gm35101	Tceanc2
Gm35279	Tdrd9
Gm36172	Tespa1
Gm36899	Tiprl
Gm36956	Tjp1
Gm37154	Tk2
Gm37292	Tmed10
Gm37764	Tmed10
Gm37805	Tmem135
Gm37904	Tmem151a
Gm37935	Tmem168
Gm37986	Tmem178b
Gm38102	Tmem219
Gm39121	Tmem238
Gm39929	Tmem42
Gm40477	Tmem79
Gm4258	Tor1b
Gm42853	Tra2b
Gm42884	Trak1
Gm43263	Trappc4
Gm43267	Trappc6b
Gm43689	Trhde
Gm43712	Trim28
Gm43852	Triqk
Gm44249	Trmt2a
Gm44647	Trp53bp1
Gm44702	Tspan2
Gm4478	Tspan9
Gm44813	Tspyl4
Gm45236	Ttr
Gm45355	Tub
Gm45359	Tusc2
Gm45437	Ubap2l
Gm45619	Ube2g1
Gm45823	Ube2j2
Gm46218	Ube2w
Gm47112	Ubr3
Gm47283	Uck1
Gm47283	Uros
Gm47496	Usp14
Gm4750	Usp33
Gm47647	Vamp1
Gm47681	Vopp1
Gm48079	Vwc2
Gm48096	Wdr17
Gm4840	Wnt6
Gm49066	Yeats2
Gm49096	Yme1l1
Gm49152	Zbtb18
Gm49288	Zbtb18
Gm49519	Zfand1
Gm49584	Zfp160
Gm49741	Zfp410
Gm49785	Zfyve16
Gm49864	Zim1
Gm50037	Zmym1
Gm50045	Zmym4
Gm50184	Zranb2
Gm50341	Zswim8
Gm5460
Gm6444
Gm6485
Gm6851
Gm7618
Gm7628
Gm7665
Gm8184
Gm8464
Gm8738
Gm9237
Gm9442
Gm9780
Gm9955
Gnb3
Gnl2
Gnl3
Got2
Gpbp1l1
Gps2
Gpsm1
Gpx3
Gpx4
Gse1
Gspt1
Gspt2
Gtf2ird1
Gtf3c5
Gtpbp3
H13
H2
H2
H2al2a
H3f4
Hadha
Haghl
Hapln3
Hapln3
Haus5
Hba
Hba
Hbb
Hbb
Hbs1l
Hbs1l
Hcls1
Hdac2
Hdac5
Hdgfl2
Herpud1
Hirip3
Hnrnpd
Huwe1
Hypk
Iah1
Ift172
Il11ra1
Il22
Ilf2
Incenp
Inppl1
Insl5
Insl5
Ints13
Iqank1
Iqcb1
Irf3
Irf3
Irf9
Isy1
Itsn2
Ivd
Junb
Junos
Kank3
Kat5
Kat5
Katna1
Kcnd1
Kcnj14
Kcnt1
Kctd15
Kctd2
Kctd3
Kdm6a
Kif4
Kifc2
Klc1
Klhdc4
Klhdc4
Kri1
Ktn1
Kxd1
Lamtor4
Large2
Lars
Lcmt1
Letm2
Lin7b
Lman2
Lpcat2
Lpgat1
Lpin2
Lrrc45
Lrrc49
Lsm4
Lsm7
Lss
Lztr1
Man1b1
Map3k4
Map4k2
Map4k2
Map7d1
Mapk1
Mark3
Mbd1
Mcrs1
Meak7
Mecr
Mecr
Med24
Med4
Men1
Mepce
Metrn
Mettl1
Mettl8
Mfge8
Mgat4b
Mid1
Mid1
Mier2
Mif
Mif4gd
Miip
Mir1291
Mir3473e
Mir421
Mir6904
Mir697
Mir7027
Mir7028
Mks1
Mks1
Mlh1
Mpnd
Mpp4
Mpp4
Mpv17l2
Mroh1
Mroh1
Mrpl38
Mrpl4
Mrpl41
Mrpl54
Mrps34
Mrs2
mt
mt
mt
Mt2
Mt2
Mtch1
Mto1
Mtrex
Muc2
Mvb12a
Mvb12a
Mybbp1a
Mypn
Naa20
Naa35
Napa
Naxd
Ncl
Ndor1
Ndufa10
Ndufa10
Ndufa3
Ndufa7
Ndufaf2
Ndufb5
Ndufs1
Ndufs2
Ndufs7
Neil1
Neurl4
Neurl4
Nfasc
Nfe2l1
Nfx1
Nit1
Nit2
Nme2
Nme6
Noc2l
Nop53
Npc2
Npdc1
Npdc1
Nprl3
Nr1d1
Nr1h2
Nr2f6
Nr4a1
Nrd1
Nrde2
Nrf1
Nsun3
Nup85
Nup85
Ogdh
Orc4
Otub1
Ovgp1
Ovgp1
P2rx5
P3h3
Pam16
Pank4
Park7
Parp2
Pcdhga4
Pcnt
Pcnx
Pcsk7
Pcyt2
Pcyt2
Pdc
Pdcd5
Pde8a
Pdia6
Pdrg1
Pdzd2
Pex11g
Pfdn6
Pfkfb4
Phyhd1
Pias3
Pias4
Pip5k1c
Pisd
Pisd
Pisd
Pitpnm1
Pitpnm1
Pla2g4b
Plac9a
Plac9b
Plekhg3
Plk1
Plod3
Pmepa1os
Pmm1
Pmpca
Pmvk
Pnpla6
Pola2
Pold3
Poldip3
Polr1c
Polr3e
Pomt1
Pomt1
Ppp1r12c
Ppp1r37
Ppp2r3d
Prdm9
Preb
Prkab1
Prkcz
Prl4a1
Prmt1
Prpf3
Prr19
Prrt1
Psmb6
Psmc6
Psmd3
Psmd8
Psmd8
Pstk
Ptbp1
Ptgds
Ptpru
Ptpru
Pttg1
Pus7l
Pusl1
Pxn
Qars
Qrsl1
Rab3ip
Rab42
Rab5if
Rabac1
Rabl6
Rae1
Ramp1
Rbm22
Rbm25
Rbm28
Rdh5
Retn
Rev3l
Rfx1
Rgl2
Rgl2
Rho
Rhpn1
Riiad1
Rnf10
Rnf123
Rnf165
Rnf207
Rnf207
Rnf207
Rnf207
Rnf207
Rnf223
Rnf25
Rnf44
Rnh1
Rnu1b6
Rnu73b
Rogdi
Rpf1
Rpgrip1
Rpgrip1
Rpl10
Rpl27
Rpl28
Rpl28
Rpl3
Rpl31
Rpl31
Rpl31
Rpl32
Rpl36
Rpl36a
Rpl37
Rpl41
Rpl6
Rplp2
Rps12
Rps14
Rps17
Rps18
Rps25
Rps5
Rps6kb2
Rps7
Rps8
Rrp1
Rrp1b
Rsph3b
Rsph9
Rundc3a
S100a13
Samd11
Samm50
Sart1
Sat2
Sbno2
Scamp2
Scarna17
Scnm1
Sec1
Sec13
Selenoh
Sema3f
Senp1
Sept1
Serhl
Sfswap
Sgsm3
Sgsm3
Sgta
Sh3glb2
Shroom3
Siglece
Six5
Skap2
Slc12a9
Slc25a18
Slc25a19
Slc26a6
Slc26a8
Slc2a4rg
Slc4a8
Slc6a6
Slc9a8
Slf2
Slirp
Slu7
Smc1a
Smg5
Smg9
Smim4
Smyd2
Snapc4
Sncb
Sned1
Snf8
Snhg6
Snora34
Snora41
Snora57
Snord7
Socs3
Sod2
Sox30
Spag5
Spem1
Spsb1
Srf
Srm
Srrd
Ssxb5
Stk11
Stk16
Stk19
Strn4
Stxbp1
Suds3
Supv3l1
Syf2
Sympk
Taldo1
Tbc1d10a
Tbc1d10b
Tbc1d17
Tbc1d24
Tbc1d8
Tctn1
Tdrd9
Tead3
Tex9
Tgm4
Tgm4
Tgm4
Tgm4
Thap3
Thap6
Thbs3
Thyn1
Tial1
Tjap1
Tjap1
Tmbim4
Tmem120b
Tmem230
Tmem86b
Tmsb10
Tnk2
Tomm40
Tpm3
Tpo
Tpt1
Trafd1
Trappc1
Trappc2l
Trappc4
Trappc6a
Trim24
Trip10
Trmt1
Trmt1
Trnau1ap
Trp53
Trpm3
Tsen15
Tsn
Tspoap1
Tstd1
Tstd1
Tstd2
Ttc5
Ttc8
Ttll3
Ttll4
Ttyh3
Tulp1
Tut7
Uba52
Ubac1
Ube2m
Ubl5
Ubtf
Ubxn6
Ucn2
Uhrf2
Uqcrb
Uqcrc1
Urod
Usp10
Usp50
Utp20
Vars2
Vars2
Vax2os
Vil1
Vps33b
Vps4a
Vps52
Vps8
Vsig10l
Wdr17
Wdr33
Wdr45
Wdr93
Whrn
Wtip
Xrcc1
Xrcc6
Zcchc10
Zcchc14
Zcchc4
Zcrb1
Zfand2a
Zfp12
Zfp131
Zfp219
Zfp410
Zfp414
Zfp444
Zfp511
Zfp523
Zfp651
Zfp658
Zfp869
Zfp873
Zfp94
Zfyve26
Zmat2

## Sheet: Supplementary Table 4
Supplementary Table 4. GO anslysis of RNA-seq.
Upregulated genes in Kdm3b heterozygous						Downregulated genes in Kdm3b heterozygous
GO Term	Count	PValue	FDR			GO Term	Count	PValue	FDR
GO:0006412: translation	58	5.02923e-09	9.17387e-06			GO:0006810: transport	191	5.36253e-11	9.87696e-08
GO:0006974: cellular response to DNA damage stimulus	52	4.23305e-06	0.00772128			GO:0007399: nervous system development	52	8.17031e-07	0.00150484
GO:0015031: protein transport	65	1.33537e-05	0.0243558			GO:0006813: potassium ion transport	24	8.65338e-06	0.015937
GO:0006810: transport	158	1.68458e-05	0.0307242			GO:0015031: protein transport	67	1.92986e-05	0.0355392
GO:0055114: oxidation-reduction process	69	7.08933e-05	0.129238			GO:0071805: potassium ion transmembrane transport	19	2.0097e-05	0.0370092
GO:0006281: DNA repair	39	9.63802e-05	0.175662			GO:0034765: regulation of ion transmembrane transport	24	2.42694e-05	0.0446911
GO:0006397: mRNA processing	38	0.000256243	0.466385			GO:0006836: neurotransmitter transport	12	0.000125352	0.230628
GO:0016052: carbohydrate catabolic process	5	0.000458923	0.833823			GO:0016567: protein ubiquitination	44	0.000134324	0.247116
GO:0045727: positive regulation of translation	12	0.000709165	1.28572			GO:0021766: hippocampus development	15	0.000260418	0.478565
GO:0008033: tRNA processing	15	0.000763918	1.38433			GO:0055085: transmembrane transport	43	0.000297383	0.546319
GO:0016192: vesicle-mediated transport	27	0.00084814	1.53584			GO:0016192: vesicle-mediated transport	29	0.000381813	0.700909
GO:0016571: histone methylation	8	0.00108402	1.959			GO:0051965: positive regulation of synapse assembly	14	0.000591049	1.08304
GO:0008380: RNA splicing	29	0.00118552	2.14056			GO:0007626: locomotory behavior	18	0.00069609	1.27435
GO:0006479: protein methylation	8	0.00136815	2.46645			GO:0006811: ion transport	60	0.000730027	1.33609
GO:0006096: glycolytic process	9	0.00144293	2.59959			GO:0046426: negative regulation of JAK-STAT cascade	10	0.00169292	3.07255
GO:0009437: carnitine metabolic process	5	0.00149249	2.68773			GO:0018107: peptidyl-threonine phosphorylation	10	0.00169292	3.07255
GO:0045292: mRNA cis splicing, via spliceosome	5	0.00149249	2.68773			GO:0007409: axonogenesis	17	0.00172197	3.12449
GO:0032259: methylation	22	0.00205482	3.68255			GO:0061564: axon development	5	0.00182156	3.30235
GO:0098869: cellular oxidant detoxification	4	0.00222395	3.97988			GO:0014059: regulation of dopamine secretion	6	0.00213801	3.86542
GO:0032418: lysosome localization	6	0.00232736	4.16124			GO:0007416: synapse assembly	10	0.0023627	4.26334
GO:0060425: lung morphogenesis	7	0.00301133	5.35271			GO:0007156: homophilic cell adhesion via plasma membrane adhesion molecules	22	0.00249398	4.49512
GO:1900745: positive regulation of p38MAPK cascade	6	0.00312882	5.55595			GO:0007601: visual perception	19	0.00287358	5.1623
GO:0030518: intracellular steroid hormone receptor signaling pathway	6	0.00312882	5.55595			GO:0006406: mRNA export from nucleus	9	0.00291239	5.23026
GO:0045444: fat cell differentiation	13	0.00356919	6.3141			GO:0071456: cellular response to hypoxia	16	0.00307381	5.51246
GO:0007601: visual perception	18	0.00391856	6.91148			GO:0006887: exocytosis	16	0.00370656	6.61095
GO:0055093: response to hyperoxia	6	0.00411151	7.23985			GO:0048511: rhythmic process	18	0.00450296	7.9764
GO:0060271: cilium morphogenesis	21	0.00486356	8.50933			GO:0031175: neuron projection development	19	0.00462995	8.19238
GO:0016569: covalent chromatin modification	29	0.00487341	8.52585			GO:0007268: chemical synaptic transmission	22	0.00473212	8.36578
GO:0033539: fatty acid beta-oxidation using acyl-CoA dehydrogenase	6	0.00529613	9.23206			GO:0032869: cellular response to insulin stimulus	14	0.00498714	8.79729
GO:0010501: RNA secondary structure unwinding	9	0.00624493	10.7984			GO:0006629: lipid metabolic process	46	0.00510623	8.99813
GO:0006351: transcription, DNA-templated	144	0.00806418	13.7307			GO:0051260: protein homooligomerization	24	0.00558841	9.80705
GO:0051225: spindle assembly	7	0.00813491	13.8428			GO:0007611: learning or memory	10	0.00568965	9.97602
GO:0008104: protein localization	12	0.00993567	16.6519			GO:0048675: axon extension	7	0.00600193	10.4954
GO:0000398: mRNA splicing, via spliceosome	15	0.0101409	16.9664			GO:0032091: negative regulation of protein binding	11	0.00626695	10.9339
GO:0000185: activation of MAPKKK activity	4	0.0108005	17.9699			GO:0018105: peptidyl-serine phosphorylation	18	0.00663041	11.532
GO:0006886: intracellular protein transport	25	0.0108025	17.973			GO:0072659: protein localization to plasma membrane	11	0.00704114	12.2033
GO:0046034: ATP metabolic process	8	0.0112038	18.5778			GO:1901998: toxin transport	8	0.00706856	12.2479
GO:0006364: rRNA processing	16	0.0122498	20.1347			GO:0048842: positive regulation of axon extension involved in axon guidance	4	0.00821798	14.1002
GO:0015986: ATP synthesis coupled proton transport	6	0.0124502	20.4299			GO:0031468: nuclear envelope reassembly	4	0.00821798	14.1002
GO:0055088: lipid homeostasis	8	0.0127996	20.9418			GO:0055075: potassium ion homeostasis	4	0.00821798	14.1002
GO:0051297: centrosome organization	7	0.013232	21.5711			GO:0048791: calcium ion-regulated exocytosis of neurotransmitter	7	0.00877468	14.9839
GO:0072659: protein localization to plasma membrane	10	0.0145254	23.4252			GO:0006469: negative regulation of protein kinase activity	14	0.00948684	16.1019
GO:0071158: positive regulation of cell cycle arrest	6	0.0149341	24.0025			GO:0006890: retrograde vesicle-mediated transport, Golgi to ER	7	0.010459	17.6057
GO:0034614: cellular response to reactive oxygen species	6	0.0149341	24.0025			GO:0016310: phosphorylation	56	0.0122622	20.3277
GO:0006446: regulation of translational initiation	7	0.015338	24.5689			GO:0033693: neurofilament bundle assembly	3	0.0124962	20.6745
GO:0030388: fructose 1,6-bisphosphate metabolic process	4	0.0154545	24.7315			GO:0042136: neurotransmitter biosynthetic process	4	0.0125082	20.6923
GO:0008152: metabolic process	42	0.0156367	24.9852			GO:0006888: ER to Golgi vesicle-mediated transport	12	0.0131528	21.6404
GO:0032456: endocytic recycling	6	0.0177288	27.8407			GO:0050885: neuromuscular process controlling balance	10	0.013201	21.711
GO:0051453: regulation of intracellular pH	7	0.0202236	31.1115			GO:0045725: positive regulation of glycogen biosynthetic process	5	0.0143486	23.371
GO:0050772: positive regulation of axonogenesis	6	0.0208482	31.9082			GO:0009409: response to cold	8	0.0147229	23.9052
GO:0000387: spliceosomal snRNP assembly	6	0.0208482	31.9082			GO:0006891: intra-Golgi vesicle-mediated transport	6	0.0154276	24.9014
GO:0045861: negative regulation of proteolysis	6	0.0208482	31.9082			GO:0008089: anterograde axonal transport	6	0.0154276	24.9014
GO:0000027: ribosomal large subunit assembly	6	0.0208482	31.9082			GO:0031647: regulation of protein stability	11	0.0161813	25.9533
GO:0006388: tRNA splicing, via endonucleolytic cleavage and ligation	4	0.0210644	32.182			GO:0007219: Notch signaling pathway	16	0.0178135	28.1835
GO:0090170: regulation of Golgi inheritance	3	0.0215837	32.8353			GO:0046777: protein autophosphorylation	21	0.018323	28.8666
GO:0018343: protein farnesylation	3	0.0215837	32.8353			GO:0007026: negative regulation of microtubule depolymerization	6	0.0184537	29.0407
GO:0009298: GDP-mannose biosynthetic process	3	0.0215837	32.8353			GO:0006470: protein dephosphorylation	17	0.0198555	30.8843
GO:0097056: selenocysteinyl-tRNA(Sec) biosynthetic process	3	0.0215837	32.8353			GO:0048813: dendrite morphogenesis	8	0.0214552	32.9328
GO:0006888: ER to Golgi vesicle-mediated transport	11	0.0232738	34.9204			GO:0017157: regulation of exocytosis	6	0.0218458	33.4241
GO:0048821: erythrocyte development	6	0.0243046	36.1618			GO:0008277: regulation of G-protein coupled receptor protein signaling pathway	7	0.0223882	34.1007
GO:0050908: detection of light stimulus involved in visual perception	5	0.0278253	40.2356			GO:0001967: suckling behavior	5	0.022522	34.2667
GO:0007005: mitochondrion organization	11	0.0294138	41.9921			GO:0007264: small GTPase mediated signal transduction	25	0.0233841	35.3263
GO:0031647: regulation of protein stability	10	0.0299625	42.5873			GO:1901907: diadenosine pentaphosphate catabolic process	3	0.0239001	35.9528
GO:0042384: cilium assembly	15	0.031168	43.8749			GO:0042461: photoreceptor cell development	3	0.0239001	35.9528
GO:0016310: phosphorylation	51	0.0319477	44.6932			GO:1901911: adenosine 5'-(hexahydrogen pentaphosphate) catabolic process	3	0.0239001	35.9528
GO:0006629: lipid metabolic process	40	0.0320474	44.7969			GO:0071543: diphosphoinositol polyphosphate metabolic process	3	0.0239001	35.9528
GO:0030517: negative regulation of axon extension	5	0.0331059	45.8878			GO:1901909: diadenosine hexaphosphate catabolic process	3	0.0239001	35.9528
GO:0007049: cell cycle	51	0.0339447	46.7377			GO:1903215: negative regulation of protein targeting to mitochondrion	3	0.0239001	35.9528
GO:0071218: cellular response to misfolded protein	3	0.0344902	47.2837			GO:0060052: neurofilament cytoskeleton organization	4	0.0242687	36.3968
GO:0045143: homologous chromosome segregation	3	0.0344902	47.2837			GO:0061025: membrane fusion	7	0.0255578	37.9268
GO:0061615: glycolytic process through fructose-6-phosphate	3	0.0344902	47.2837			GO:0007623: circadian rhythm	14	0.0256044	37.9815
GO:0006875: cellular metal ion homeostasis	3	0.0344902	47.2837			GO:0048026: positive regulation of mRNA splicing, via spliceosome	5	0.0274803	40.1442
GO:0075525: viral translational termination-reinitiation	3	0.0344902	47.2837			GO:0007413: axonal fasciculation	5	0.0274803	40.1442
GO:0019430: removal of superoxide radicals	4	0.035172	47.9586			GO:0016358: dendrite development	7	0.0290122	41.8571
GO:0042147: retrograde transport, endosome to Golgi	9	0.0355978	48.376			GO:0015937: coenzyme A biosynthetic process	4	0.0317616	44.8157
GO:0045494: photoreceptor cell maintenance	7	0.0367742	49.5127			GO:0016082: synaptic vesicle priming	4	0.0317616	44.8157
GO:0051898: negative regulation of protein kinase B signaling	7	0.0367742	49.5127			GO:0035879: plasma membrane lactate transport	4	0.0317616	44.8157
GO:0021766: hippocampus development	10	0.0379477	50.6229			GO:0071383: cellular response to steroid hormone stimulus	4	0.0317616	44.8157
GO:0001932: regulation of protein phosphorylation	9	0.0387196	51.3407			GO:0045332: phospholipid translocation	4	0.0317616	44.8157
GO:0000028: ribosomal small subunit assembly	5	0.0389303	51.5348			GO:0008203: cholesterol metabolic process	12	0.0321725	45.2455
GO:0006979: response to oxidative stress	15	0.0389623	51.5642			GO:0006886: intracellular protein transport	24	0.0336012	46.7152
GO:0006417: regulation of translation	14	0.0395777	52.1269			GO:0001764: neuron migration	15	0.0342564	47.3767
GO:0000184: nuclear-transcribed mRNA catabolic process, nonsense-mediated decay	6	0.0416916	54.0129			GO:2000463: positive regulation of excitatory postsynaptic potential	6	0.0343498	47.4704
GO:0007568: aging	18	0.0435916	55.6479			GO:0086091: regulation of heart rate by cardiac conduction	6	0.0343498	47.4704
GO:0006122: mitochondrial electron transport, ubiquinol to cytochrome c	4	0.0436471	55.6948			GO:0060412: ventricular septum morphogenesis	7	0.0368075	49.879
GO:0000060: protein import into nucleus, translocation	6	0.0469619	58.414			GO:0030534: adult behavior	7	0.0368075	49.879
GO:0010669: epithelial structure maintenance	3	0.0496149	60.4757			GO:0021762: substantia nigra development	7	0.0368075	49.879
GO:0060219: camera-type eye photoreceptor cell differentiation	3	0.0496149	60.4757			GO:0051291: protein heterooligomerization	12	0.0370561	50.1168
GO:0006413: translational initiation	8	0.0502729	60.9719			GO:0032463: negative regulation of protein homooligomerization	3	0.0381028	51.106
GO:0006754: ATP biosynthetic process	5	0.0522171	62.4038			GO:0071442: positive regulation of histone H3-K14 acetylation	3	0.0381028	51.106
GO:0098656: anion transmembrane transport	4	0.0530373	62.9929			GO:0015718: monocarboxylic acid transport	3	0.0381028	51.106
GO:0044255: cellular lipid metabolic process	4	0.0530373	62.9929			GO:0043949: regulation of cAMP-mediated signaling	3	0.0381028	51.106
GO:0061014: positive regulation of mRNA catabolic process	4	0.0530373	62.9929			GO:0019896: axonal transport of mitochondrion	3	0.0381028	51.106
GO:0051974: negative regulation of telomerase activity	4	0.0530373	62.9929			GO:0001504: neurotransmitter uptake	3	0.0381028	51.106
GO:0006400: tRNA modification	4	0.0530373	62.9929			GO:0060384: innervation	5	0.0392037	52.1265
GO:0033235: positive regulation of protein sumoylation	4	0.0530373	62.9929			GO:0048066: developmental pigmentation	5	0.0392037	52.1265
GO:0007018: microtubule-based movement	10	0.0542649	63.8583			GO:0030521: androgen receptor signaling pathway	5	0.0392037	52.1265
GO:0005975: carbohydrate metabolic process	20	0.0585153	66.7091			GO:0097067: cellular response to thyroid hormone stimulus	4	0.040316	53.1371
GO:0048477: oogenesis	6	0.0586338	66.7855			GO:0051932: synaptic transmission, GABAergic	4	0.040316	53.1371

## Sheet: Supplementary Table 5
Supplementary Table 5. ChIP-seq peaks																		Supplementary Table 5. ChIP-seq Peaks.
Kdm3b Peaks				H3K9me1 Peaks in WT				H3K9me2 Peaks in WT				H3K9me3 Peaks in WT				H3K9me1 Peaks in Hetero				H3K9me2 Peaks in Hetero				H3K9me3 Peaks in Hetero
chr	start	end		chr	start	end		chr	start	end		chr	start	end		chr	start	end		chr	start	end		chr	start	end
1	3127800	3127999		1	3492800	3494199		1	3019200	3019399		1	3116600	3116799		1	3044600	3044999		1	3075200	3075599		1	3058800	3059199
1	3152600	3152799		1	3758000	3758399		1	3076000	3076399		1	3122400	3122599		1	3054600	3055199		1	3145600	3146599		1	3223600	3224199
1	3155600	3155799		1	4966600	4967199		1	3115200	3116199		1	3180400	3180799		1	3213800	3214199		1	3214400	3214799		1	3463000	3463399
1	3223200	3223599		1	5155200	5155599		1	3168000	3168799		1	3312000	3312199		1	3225400	3225599		1	3263000	3263199		1	3468000	3468799
1	3264200	3264599		1	5370200	5370399		1	3198600	3198799		1	3325400	3325599		1	3364000	3364399		1	3319400	3319599		1	3514000	3514799
1	3266800	3266999		1	5950200	5950399		1	3425800	3426799		1	3422000	3423199		1	3415800	3415999		1	3450600	3451199		1	3535200	3536399
1	3391800	3391999		1	6100000	6101599		1	3451400	3451799		1	3534600	3535799		1	3503800	3504199		1	3470600	3470999		1	3589000	3589599
1	3406000	3406199		1	6276200	6276399		1	3467200	3467599		1	3719600	3719799		1	3592000	3592199		1	3694400	3695199		1	3608000	3608199
1	3432600	3433399		1	6372400	6372599		1	3477600	3477999		1	3793800	3794799		1	3633200	3633599		1	3714600	3714999		1	3812000	3812399
1	3453000	3453599		1	6723600	6723799		1	3510600	3510799		1	3853200	3853599		1	3681400	3682599		1	3744800	3745399		1	3976200	3977599
1	3481400	3481599		1	6774800	6775799		1	3517800	3517999		1	4145200	4145399		1	3751000	3751199		1	3789200	3789999		1	4085400	4086999
1	3546800	3546999		1	6872400	6873799		1	3535000	3535199		1	4274800	4274999		1	3804000	3804199		1	3872400	3872799		1	4156000	4156199
1	3559800	3559999		1	7393400	7396199		1	3543400	3543599		1	4290200	4290999		1	3915800	3915999		1	3926800	3928199		1	4176400	4176599
1	3576200	3578199		1	7512400	7512799		1	3566000	3566199		1	4294400	4294599		1	3998400	3998799		1	3958200	3958999		1	4261200	4262999
1	3747400	3747599		1	7592800	7593999		1	3576000	3576999		1	4320000	4320799		1	4117400	4117599		1	4042800	4043399		1	4446400	4446599
1	3777200	3777399		1	8055000	8056799		1	3591400	3591799		1	4380400	4380599		1	4187200	4187999		1	4053000	4053399		1	4465000	4465199
1	3826600	3826799		1	8502400	8503599		1	3604800	3605199		1	4427800	4428599		1	4255800	4255999		1	4061800	4062399		1	4477000	4477199
1	3951600	3952199		1	8959800	8960999		1	3675400	3676599		1	4435000	4435199		1	4358600	4358799		1	4116000	4116599		1	4504000	4505999
1	3961400	3961799		1	8979400	8979599		1	3705600	3706199		1	4651800	4652599		1	4383800	4384399		1	4143200	4143599		1	4628200	4628599
1	3965000	3965199		1	9324200	9324399		1	3724400	3724599		1	4669200	4669599		1	4464400	4464799		1	4163000	4163399		1	4859600	4859799
1	3974400	3974599		1	9334200	9335799		1	3734800	3734999		1	4857000	4857199		1	4473000	4473199		1	4178400	4178799		1	4874200	4874599
1	4053800	4053999		1	9393600	9394999		1	3764000	3764399		1	4868000	4868799		1	4477000	4477599		1	4269000	4269399		1	4893800	4894399
1	4143400	4143599		1	9788800	9788999		1	3770000	3770199		1	4882800	4882999		1	4505200	4505599		1	4272000	4272999		1	4905600	4905799
1	4211000	4211199		1	9795600	9795799		1	3817800	3818799		1	4970800	4970999		1	4746800	4746999		1	4326000	4326799		1	5109600	5110199
1	4216400	4216799		1	9797600	9797799		1	3850800	3851199		1	5010800	5011199		1	4812800	4812999		1	4330200	4330799		1	5728400	5728599
1	4236200	4236399		1	9918800	9919799		1	3869800	3869999		1	5055000	5055399		1	4889600	4889999		1	4351000	4355599		1	5866600	5867999
1	4270600	4270999		1	10199800	10201199		1	3880400	3880799		1	5122000	5122199		1	4906800	4906999		1	4407000	4408199		1	5944600	5944799
1	4272000	4272399		1	10413200	10413599		1	3910800	3911199		1	5123400	5123599		1	4969600	4969799		1	4422200	4422999		1	5948400	5948599
1	4275200	4275399		1	10535600	10536599		1	3953200	3953399		1	5157800	5157999		1	5110000	5110599		1	4507600	4508799		1	5951000	5952999
1	4276400	4276599		1	10547600	10548599		1	3992600	3992799		1	5334000	5334199		1	5111400	5112999		1	4580600	4581999		1	6087800	6087999
1	4322000	4322199		1	10649600	10649999		1	4047000	4047599		1	5335000	5336199		1	5155800	5156399		1	4624200	4625399		1	6101600	6101799
1	4434400	4435199		1	10797600	10799199		1	4085800	4085999		1	5399200	5399399		1	5229000	5229199		1	4674200	4675199		1	6123400	6124399
1	4450000	4450399		1	10970200	10970399		1	4116000	4116599		1	5414200	5414799		1	5263200	5263399		1	4750200	4751399		1	6302400	6304599
1	4518600	4519399		1	11916800	11916999		1	4152400	4152799		1	5500400	5500799		1	5279200	5279799		1	4797600	4798799		1	6350800	6351399
1	4521400	4522199		1	12419400	12419999		1	4154200	4154399		1	5511000	5511799		1	5281400	5281999		1	4815200	4815399		1	6355800	6358199
1	4576600	4576999		1	12673800	12675599		1	4161400	4161599		1	5608000	5610399		1	5379800	5380399		1	4878200	4879199		1	6450600	6452199
1	4581000	4581199		1	12948200	12948799		1	4166600	4167799		1	5666200	5668399		1	5468400	5468599		1	4898400	4899199		1	6691200	6692399
1	4615800	4615999		1	13429200	13429599		1	4194800	4195199		1	5673400	5673599		1	5523400	5523799		1	4964800	4964999		1	6819000	6819199
1	4658800	4659399		1	14038800	14039399		1	4202000	4202799		1	5725400	5725599		1	5627200	5627399		1	5083600	5083999		1	6877600	6878799
1	4703800	4703999		1	14328000	14328199		1	4207400	4207599		1	5761600	5761799		1	5657000	5657799		1	5093000	5095599		1	6931600	6932999
1	4747200	4747399		1	14833800	14834199		1	4281200	4281399		1	5819000	5819199		1	5696200	5696399		1	5129000	5129999		1	6959400	6959799
1	4779000	4779399		1	15157000	15157199		1	4310600	4311399		1	5838600	5838799		1	5841200	5841399		1	5196800	5196999		1	7029400	7029599
1	4941000	4941199		1	15338400	15339599		1	4338800	4338999		1	5891600	5891799		1	5897600	5898199		1	5230200	5230399		1	7046800	7048199
1	4994600	4995399		1	15350000	15351199		1	4388200	4388599		1	5903600	5903999		1	6023200	6023399		1	5294200	5294799		1	7094000	7094799
1	5068400	5068599		1	15586400	15586599		1	4449800	4450199		1	6093200	6093599		1	6073000	6073399		1	5425600	5427199		1	7209400	7209799
1	5078800	5080199		1	15659400	15659799		1	4458200	4458399		1	6099600	6099799		1	6126400	6126799		1	5431200	5432999		1	7297800	7298399
1	5110200	5110399		1	15783800	15784799		1	4571400	4571599		1	6122800	6123199		1	6175800	6175999		1	5453200	5453599		1	7312000	7312399
1	5146400	5146799		1	16260000	16260399		1	4575600	4575799		1	6356200	6357199		1	6197800	6197999		1	5538200	5538599		1	7389200	7389399
1	5151800	5152199		1	16595200	16595599		1	4634400	4635399		1	6387000	6387599		1	6382200	6383199		1	5576000	5576999		1	7397600	7397999
1	5158800	5159199		1	17088800	17089999		1	4684600	4685599		1	6407600	6408399		1	6562200	6562599		1	5612400	5612599		1	7722200	7722999
1	5172400	5172599		1	17132000	17132999		1	4731400	4731599		1	6472800	6472999		1	6607200	6607399		1	5650400	5650799		1	7746000	7746399
1	5199200	5199399		1	17414200	17414599		1	4845000	4845999		1	6608200	6608399		1	6643200	6643799		1	5712000	5712399		1	7973000	7973199
1	5255400	5255599		1	17668600	17670799		1	4937800	4938799		1	6655000	6655199		1	6792600	6793199		1	5772200	5772599		1	8128600	8128999
1	5261800	5261999		1	17770200	17770399		1	5006800	5006999		1	6683400	6683599		1	6859800	6859999		1	5784400	5784599		1	8172000	8172199
1	5335200	5335399		1	17915600	17916199		1	5013000	5013199		1	6722600	6722799		1	6867400	6867599		1	5840000	5840399		1	8229800	8230799
1	5336600	5336799		1	18197600	18198599		1	5040200	5040799		1	6726000	6726199		1	7124800	7125399		1	5847800	5849799		1	8318600	8319199
1	5482600	5482999		1	18616200	18617399		1	5055400	5055599		1	6738400	6738599		1	7203000	7203999		1	5888400	5888799		1	8463600	8463799
1	5619200	5619399		1	18629600	18630199		1	5088600	5088799		1	6941200	6941599		1	7263200	7263399		1	5906600	5907199		1	8568200	8568799
1	5652200	5652599		1	18829200	18829399		1	5116800	5116999		1	6960400	6961799		1	7335000	7335599		1	5959000	5959599		1	8578600	8578999
1	5727400	5728999		1	19056800	19057599		1	5180000	5180599		1	6994600	6994799		1	7455400	7455999		1	6001800	6002999		1	8609800	8609999
1	5738000	5738399		1	19341600	19341999		1	5183400	5183799		1	7307200	7307599		1	7490800	7491199		1	6022000	6022799		1	8618600	8619599
1	5789800	5789999		1	19541400	19542199		1	5203800	5204199		1	7346600	7347799		1	7647000	7647199		1	6112200	6112399		1	8747600	8747999
1	5981000	5982199		1	20013000	20014599		1	5221400	5221799		1	7393400	7395199		1	7788200	7788399		1	6173400	6173999		1	8865200	8865599
1	6000200	6000599		1	20906800	20909199		1	5301600	5302799		1	7443400	7444599		1	7843200	7843399		1	6238000	6239199		1	8922800	8923399
1	6092000	6092199		1	21113800	21114199		1	5451800	5451999		1	7473200	7474199		1	8010400	8010999		1	6261800	6262599		1	9015800	9016199
1	6115400	6115599		1	21275600	21275999		1	5486800	5488599		1	7489400	7489799		1	8123200	8123599		1	6367400	6368399		1	9283000	9283199
1	6242000	6242199		1	21534000	21534599		1	5511200	5511799		1	7548600	7548799		1	8227000	8227199		1	6609200	6611199		1	9355000	9355599
1	6276600	6276799		1	21578800	21579199		1	5599400	5599799		1	7678000	7678199		1	8241000	8241199		1	6653600	6653799		1	9622200	9622599
1	6516200	6516399		1	22571200	22571999		1	5633600	5633799		1	7769200	7769399		1	8266000	8266399		1	6655600	6655799		1	9765000	9765199
1	6530000	6530399		1	23253800	23253999		1	5643200	5643399		1	7799400	7799599		1	8387200	8387399		1	6714600	6716399		1	9780200	9781199
1	6539800	6539999		1	23427800	23428199		1	5698400	5699199		1	7891800	7892199		1	8388800	8388999		1	6730800	6731799		1	9888200	9888599
1	6551800	6551999		1	23787200	23787399		1	5706600	5706799		1	7924200	7924399		1	8592000	8592599		1	6735400	6735799		1	10023400	10023599
1	6783600	6783799		1	23980800	23981199		1	5770800	5770999		1	7939000	7939199		1	8607200	8607599		1	6740200	6740399		1	10043600	10045199
1	6836400	6836799		1	24069400	24069999		1	5779200	5779999		1	7970800	7971199		1	8646000	8646399		1	6849800	6851399		1	10068600	10068799
1	6876600	6876799		1	24267400	24267599		1	5791600	5792799		1	7981800	7982999		1	8708600	8709199		1	6955800	6956399		1	10070800	10072199
1	6882200	6883199		1	24485600	24487199		1	5818800	5818999		1	8038800	8039199		1	8783000	8783399		1	6963600	6964399		1	10162000	10162399
1	6897400	6897599		1	24828200	24828399		1	5851400	5851799		1	8163400	8163599		1	8815800	8815999		1	7089400	7089999		1	10259600	10259799
1	6935800	6935999		1	24950200	24951399		1	5857400	5857599		1	8227800	8228799		1	8910800	8911399		1	7091000	7093199		1	10262000	10262399
1	7031600	7032399		1	25059000	25061399		1	5859200	5859399		1	8276200	8276599		1	8985600	8985799		1	7116400	7116599		1	10278800	10278999
1	7039400	7039599		1	25338600	25339599		1	5896600	5896799		1	8454800	8455599		1	9228200	9228399		1	7127400	7128399		1	10287400	10288599
1	7080000	7080199		1	25362200	25363799		1	5905000	5906799		1	8491000	8491599		1	9383400	9383599		1	7130600	7131799		1	10333400	10334599
1	7083000	7083999		1	25412400	25412999		1	5931200	5931399		1	8550600	8551599		1	9536400	9536599		1	7297000	7298599		1	10376200	10376399
1	7154600	7155599		1	25555600	25557399		1	5935400	5935799		1	8593600	8593799		1	9551200	9551399		1	7367800	7368199		1	10475600	10475999
1	7211000	7211199		1	25558800	25561199		1	5938800	5938999		1	8596400	8596599		1	9595800	9596199		1	7375200	7375999		1	10583000	10583399
1	7278400	7278599		1	25863600	25864599		1	5956600	5957799		1	8604600	8604799		1	9598400	9598599		1	7408200	7408999		1	10590200	10590799
1	7290200	7290399		1	26645200	26646599		1	5971600	5974199		1	8609000	8609199		1	9650600	9650799		1	7415000	7415199		1	10760000	10760999
1	7340800	7340999		1	27168800	27170399		1	6041200	6043399		1	8615200	8615999		1	9705800	9705999		1	7606600	7606799		1	10822200	10822799
1	7409000	7409399		1	27525000	27526999		1	6081400	6082199		1	8670200	8670399		1	9710600	9710999		1	7671200	7671799		1	10921000	10921399
1	7495800	7495999		1	27568200	27569599		1	6092200	6092999		1	8770000	8770199		1	9753200	9753399		1	7676200	7676599		1	11164600	11164799
1	7627600	7627799		1	27695400	27697399		1	6118600	6118799		1	8834200	8834399		1	9792000	9792199		1	7677400	7677999		1	11236800	11237799
1	7653200	7653399		1	28020800	28021799		1	6127600	6127999		1	8889600	8890799		1	9891800	9892599		1	7713000	7713199		1	11454600	11454999
1	7725600	7725799		1	28333400	28334799		1	6156200	6156399		1	9127000	9127199		1	9953000	9953599		1	7781400	7781799		1	11596800	11597399
1	7749000	7749199		1	28416400	28418599		1	6191600	6191799		1	9156000	9156399		1	10004600	10004799		1	7825000	7825999		1	11785000	11785599
1	7807000	7807599		1	28440400	28440599		1	6196000	6196199		1	9189200	9189399		1	10009000	10009399		1	7884400	7884799		1	11937600	11939399
1	7817800	7817999		1	28490800	28491399		1	6230800	6231399		1	9253600	9253799		1	10037600	10037799		1	7914000	7914799		1	11994000	11994199
1	7831800	7832199		1	28810600	28810999		1	6242400	6242799		1	9287400	9287799		1	10132400	10132999		1	7921600	7921799		1	12053000	12054399
1	7882200	7882399		1	28879400	28880199		1	6256600	6256799		1	9291400	9292199		1	10162600	10162799		1	8039200	8039399		1	12286400	12287599
1	7926200	7926399		1	28953600	28954399		1	6262600	6262999		1	9315600	9316399		1	10274200	10274399		1	8076000	8077399		1	12302400	12303399
1	8106600	8106799		1	29122200	29123599		1	6322400	6322599		1	9337200	9337799		1	10283000	10283199		1	8100200	8100999		1	12304800	12305199
1	8170400	8170599		1	29309600	29311599		1	6328400	6328599		1	9350800	9351999		1	10409200	10409399		1	8113800	8114999		1	12308600	12308999
1	8278200	8278399		1	29365000	29365599		1	6387600	6387999		1	9428600	9428999		1	10430800	10430999		1	8116400	8117599		1	12328400	12329199
1	8363200	8363399		1	29534000	29534599		1	6389000	6389199		1	9451800	9452599		1	10543200	10543599		1	8130800	8131199		1	12450800	12451399
1	8383000	8383599		1	29692400	29692999		1	6443000	6443799		1	9457400	9458199		1	10554200	10554399		1	8230800	8231799		1	12763200	12763599
1	8403000	8403199		1	30795800	30797599		1	6456200	6456399		1	9525000	9525399		1	10626200	10626599		1	8272800	8273799		1	12789400	12789599
1	8453000	8453199		1	31145600	31147399		1	6464200	6464399		1	9667800	9667999		1	10664600	10664999		1	8344200	8345399		1	12805600	12806599
1	8473200	8473399		1	31209600	31209999		1	6484800	6485599		1	9685800	9685999		1	10681800	10681999		1	8356200	8356399		1	12840600	12841199
1	8505200	8505799		1	31508200	31510599		1	6526600	6527199		1	9820600	9820999		1	10700800	10701199		1	8387000	8387599		1	12951800	12952799
1	8618400	8618599		1	31728800	31729599		1	6535600	6535999		1	10050800	10050999		1	10708200	10708599		1	8413400	8413999		1	12988800	12989199
1	8661200	8661399		1	31810800	31811999		1	6559200	6559399		1	10064000	10064399		1	10933000	10933399		1	8443400	8445799		1	13047400	13047599
1	8686400	8686599		1	31834200	31835399		1	6561200	6561599		1	10196000	10196399		1	11007400	11007999		1	8630400	8631599		1	13062800	13062999
1	8824200	8824399		1	31859800	31860799		1	6586000	6586999		1	10197800	10197999		1	11059600	11060799		1	8647400	8647799		1	13132000	13132999
1	8850800	8850999		1	32108000	32108199		1	6593400	6593799		1	10349000	10349199		1	11215200	11215399		1	8744000	8745199		1	13152200	13152399
1	8897600	8897799		1	32152400	32154599		1	6616400	6617399		1	10481000	10481199		1	11249200	11249399		1	8779600	8780199		1	13182400	13184599
1	9002200	9002399		1	32295000	32296199		1	6665000	6665399		1	10524000	10524199		1	11295200	11295399		1	8823600	8824399		1	13303400	13303799
1	9113400	9113599		1	32369200	32369599		1	6675600	6675999		1	10557000	10557599		1	11470400	11470799		1	8833800	8834399		1	13372400	13372799
1	9189600	9189799		1	32553400	32554799		1	6780800	6782399		1	10575400	10575799		1	11646400	11646599		1	9014600	9014999		1	13417800	13418999
1	9224400	9224599		1	32607000	32607799		1	6800000	6801199		1	10587000	10587399		1	11705000	11705199		1	9103000	9103999		1	13544600	13544799
1	9440800	9441199		1	33188400	33189399		1	6824600	6824799		1	10598800	10598999		1	11826200	11826399		1	9108200	9109199		1	13594600	13595199
1	9458200	9458399		1	33383200	33383399		1	6841600	6841799		1	10600000	10600199		1	11872000	11872599		1	9159800	9160599		1	13609000	13610199
1	9504800	9504999		1	34527600	34527999		1	6876600	6876799		1	10700400	10700799		1	11894200	11894399		1	9191000	9191199		1	13696000	13696399
1	9531000	9531399		1	34848200	34848799		1	6882200	6883999		1	10701600	10701799		1	12111000	12111199		1	9207800	9209399		1	13915200	13916999
1	9534800	9534999		1	34898200	34899199		1	6925000	6925199		1	10716200	10717999		1	12134800	12135399		1	9226600	9227199		1	13925800	13926399
1	9544200	9545399		1	34990800	34992399		1	6934600	6934799		1	10748200	10748399		1	12145400	12145599		1	9292400	9292999		1	14107400	14107799
1	9550600	9550799		1	35197800	35197999		1	6943000	6943399		1	10757600	10758399		1	12202200	12202399		1	9420800	9421199		1	14144200	14144399
1	9604000	9604199		1	36114800	36115599		1	6973400	6974199		1	10795000	10795199		1	12212000	12212199		1	9534800	9535999		1	14408000	14408399
1	9653200	9653399		1	36273800	36275399		1	7063600	7064199		1	10871400	10871599		1	12316400	12316599		1	9542800	9543799		1	14460800	14461199
1	9728200	9728399		1	36364800	36365999		1	7072800	7073199		1	10881800	10881999		1	12459200	12459999		1	9576200	9577199		1	14516000	14518199
1	9777600	9777999		1	36873200	36874399		1	7091200	7091799		1	10897400	10897599		1	12460800	12461199		1	9598400	9598799		1	14543000	14544599
1	9779400	9779599		1	36968400	36969399		1	7157800	7157999		1	11248200	11248399		1	12473200	12473599		1	9714600	9714999		1	14643800	14644199
1	9837800	9838799		1	37690800	37691999		1	7159600	7160399		1	11250800	11250999		1	12500000	12500599		1	9729000	9729199		1	14671600	14671999
1	9874200	9874599		1	37743200	37744999		1	7243600	7243999		1	11297200	11297599		1	12524200	12524799		1	9760400	9761399		1	14704000	14704199
1	9892800	9893199		1	38064400	38067399		1	7255800	7255999		1	11435200	11435599		1	12539400	12539999		1	9782000	9782199		1	14784800	14785199
1	9897600	9898199		1	38280000	38280799		1	7260600	7261599		1	11492400	11493799		1	12558000	12558199		1	9802000	9802399		1	14857000	14857599
1	10068400	10068599		1	38472200	38473799		1	7301000	7301199		1	11549600	11549799		1	12657400	12657999		1	9804200	9805999		1	14962400	14962799
1	10113200	10113399		1	38856000	38856199		1	7344400	7344999		1	11560600	11560799		1	12693400	12693599		1	9837000	9837799		1	15070400	15070599
1	10176400	10176599		1	39911000	39911999		1	7379200	7379399		1	11596800	11598999		1	12742000	12742199		1	9897600	9899599		1	15164800	15165799
1	10244600	10244799		1	40036200	40036599		1	7426000	7426199		1	11667600	11667799		1	12803600	12803799		1	9962800	9965199		1	15328200	15328399
1	10253400	10253599		1	40110200	40111399		1	7451200	7452599		1	11689800	11689999		1	12830800	12831399		1	9981400	9983399		1	15610400	15610799
1	10320800	10320999		1	40117000	40117599		1	7473200	7473599		1	11883600	11883999		1	12839400	12839799		1	10002400	10003199		1	15698200	15698599
1	10360400	10361399		1	40416200	40416799		1	7490400	7490599		1	11924800	11925199		1	12877800	12877999		1	10021400	10021999		1	15728800	15729799
1	10363800	10364599		1	40637600	40637799		1	7515600	7518199		1	11979600	11979799		1	12948000	12948199		1	10045200	10045599		1	15785600	15785999
1	10558200	10558399		1	41376400	41376799		1	7532000	7532199		1	12123800	12123999		1	13073800	13074199		1	10065000	10065399		1	15882800	15883199
1	10584200	10584999		1	41668200	41669199		1	7537600	7537799		1	12166600	12166799		1	13076400	13076599		1	10070800	10071799		1	15894800	15895399
1	10617800	10618199		1	41775000	41775199		1	7551600	7552399		1	12169200	12169999		1	13121400	13122599		1	10106400	10107399		1	15913400	15914799
1	10659600	10659799		1	42105200	42105599		1	7574800	7575199		1	12184600	12184799		1	13167600	13167999		1	10133800	10134799		1	15939200	15939799
1	10720400	10721399		1	42718800	42719999		1	7641600	7641799		1	12302800	12302999		1	13199600	13199799		1	10148200	10148399		1	16046200	16046599
1	10811600	10812799		1	43019800	43019999		1	7657400	7657599		1	12406000	12407799		1	13229400	13230199		1	10159400	10160999		1	16101200	16101599
1	10991800	10992399		1	43238200	43239799		1	7773400	7773799		1	12635000	12635199		1	13237600	13237799		1	10173800	10174799		1	16103400	16104999
1	11027600	11028799		1	43253600	43254599		1	7837000	7837199		1	12637000	12637199		1	13248400	13248599		1	10260600	10261799		1	16106400	16107399
1	11154400	11154599		1	43501000	43501799		1	7864600	7864799		1	12642800	12642999		1	13275600	13275799		1	10300400	10300999		1	16128200	16128399
1	11231800	11231999		1	43948600	43949599		1	7878000	7878399		1	12744400	12744799		1	13317200	13318399		1	10379600	10381199		1	16180800	16182399
1	11237000	11237199		1	43951800	43953199		1	7900800	7901199		1	12902200	12902399		1	13374200	13374999		1	10482200	10483399		1	16184200	16184399
1	11312000	11312199		1	43959600	43961799		1	7903400	7903799		1	12957800	12957999		1	13460200	13460399		1	10503600	10504399		1	16204600	16205399
1	11346800	11347799		1	43983000	43985199		1	7906000	7906199		1	13025200	13025399		1	13465400	13465599		1	10601200	10601999		1	16236200	16236599
1	11362800	11362999		1	44521200	44523599		1	8075600	8075799		1	13316200	13316399		1	13486200	13486399		1	10711600	10712799		1	16270600	16270799
1	11472200	11472399		1	44587800	44589399		1	8081200	8081799		1	13390600	13390799		1	13619600	13619999		1	10720600	10720799		1	16547200	16548199
1	11533000	11533199		1	44638600	44640399		1	8086000	8086999		1	13405200	13405399		1	13756400	13756799		1	10738000	10738799		1	16569800	16570399
1	11558000	11558199		1	44783600	44785399		1	8130800	8130999		1	13447400	13447599		1	13857000	13857199		1	10793800	10795599		1	16670600	16670999
1	11562800	11562999		1	44891600	44894599		1	8145600	8146399		1	13470800	13470999		1	13874000	13874799		1	10910200	10910599		1	16679000	16679399
1	11581200	11581399		1	45314200	45315199		1	8169200	8169399		1	13749200	13749399		1	13937400	13937599		1	10947800	10948399		1	16749400	16751399
1	11627200	11627399		1	45546200	45548399		1	8227200	8227399		1	13772800	13772999		1	14050600	14050799		1	10996600	10996799		1	16848200	16849199
1	11711600	11711799		1	45671600	45674799		1	8258000	8258999		1	13782000	13782399		1	14065000	14065199		1	11004600	11005999		1	16973200	16973799
1	11815800	11815999		1	45740800	45740999		1	8282400	8282799		1	13798400	13798599		1	14155400	14155999		1	11022600	11023399		1	17035200	17035599
1	11826000	11826599		1	45976800	45977199		1	8410200	8410599		1	14054600	14054799		1	14227800	14227999		1	11037000	11037199		1	17205000	17206399
1	11837400	11837599		1	46363200	46364999		1	8426800	8427399		1	14104200	14104799		1	14232400	14232999		1	11116000	11117199		1	17423400	17423999
1	11849600	11850599		1	46377600	46378999		1	8457000	8457799		1	14205400	14205799		1	14300400	14300599		1	11134400	11134999		1	17433000	17433599
1	11898800	11899199		1	46412400	46412799		1	8469600	8469799		1	14228400	14228799		1	14587200	14587399		1	11153600	11155199		1	17546800	17547199
1	11935600	11935799		1	46415000	46417599		1	8481600	8481999		1	14252600	14252799		1	14602200	14602599		1	11168200	11169999		1	17563600	17564199
1	12100000	12100199		1	46484000	46484199		1	8516000	8516399		1	14320800	14321799		1	14611600	14611799		1	11289600	11290199		1	17569000	17570199
1	12125000	12125399		1	47442600	47445999		1	8560600	8561599		1	14370000	14370199		1	14710000	14710199		1	11314200	11314799		1	17595800	17598199
1	12130800	12130999		1	47559600	47561799		1	8943200	8943399		1	14384200	14384399		1	14758600	14758999		1	11319600	11320999		1	17601600	17601999
1	12175000	12175199		1	47617400	47618799		1	8966600	8966999		1	14412200	14412399		1	14896400	14896999		1	11376600	11376999		1	17726200	17726799
1	12360600	12360799		1	47742000	47742599		1	8983200	8983399		1	14444000	14444199		1	14901200	14901399		1	11386800	11387399		1	17821400	17821599
1	12427600	12428599		1	47778000	47778399		1	9076600	9077799		1	14552800	14553399		1	15043000	15043599		1	11430400	11430999		1	17823600	17823799
1	12433000	12433199		1	47988400	47988999		1	9166000	9166999		1	14564000	14564199		1	15099200	15099599		1	11433200	11433599		1	17903600	17904199
1	12543800	12543999		1	48056800	48056999		1	9223400	9223599		1	14581800	14583399		1	15282600	15282799		1	11604600	11605199		1	17956200	17958199
1	12554200	12554399		1	48233400	48233799		1	9257400	9258399		1	14675400	14676399		1	15295200	15295599		1	11714600	11714799		1	18001400	18001599
1	12555600	12556599		1	48479800	48480199		1	9310400	9310599		1	14698200	14698399		1	15643200	15643399		1	11787800	11788799		1	18034400	18034799
1	12641000	12641199		1	48505400	48505999		1	9335800	9336199		1	14762000	14762399		1	15774800	15775199		1	11798800	11798999		1	18272600	18273999
1	12644600	12644999		1	48576600	48577999		1	9363800	9365599		1	14809600	14809799		1	15801000	15801399		1	11814800	11814999		1	18375600	18376399
1	12652200	12652399		1	48830800	48830999		1	9368800	9369199		1	14909600	14910599		1	15843600	15843999		1	11826200	11826599		1	18428200	18429199
1	12685200	12685399		1	48833600	48837399		1	9428000	9428599		1	14944800	14945199		1	15921800	15921999		1	11915600	11915799		1	18457800	18458199
1	12749600	12750199		1	49316000	49316999		1	9440800	9441399		1	14964600	14964799		1	15963000	15963999		1	11951800	11952199		1	18505400	18505999
1	12835800	12835999		1	49562800	49562999		1	9491800	9491999		1	15216000	15216399		1	16029000	16029399		1	11955600	11956199		1	18661000	18661999
1	12900000	12900199		1	49619800	49619999		1	9499200	9500799		1	15242600	15242799		1	16050800	16050999		1	11993800	11994199		1	18788600	18790399
1	12904600	12904799		1	49655200	49655399		1	9514400	9514599		1	15316000	15316799		1	16087000	16087199		1	12020600	12021399		1	18793400	18793799
1	12944400	12944799		1	49745400	49747599		1	9613800	9615199		1	15337400	15337599		1	16095000	16095199		1	12038200	12038399		1	18971800	18971999
1	12982800	12982999		1	49899600	49900199		1	9642000	9642399		1	15406600	15407199		1	16114800	16116199		1	12133000	12134199		1	19045200	19045599
1	13127600	13127799		1	49912800	49912999		1	9684800	9686599		1	15414600	15414799		1	16275800	16276199		1	12173600	12174799		1	19117400	19117599
1	13139400	13139599		1	49929800	49932199		1	9695000	9695399		1	15499000	15499199		1	16287000	16287199		1	12333200	12334199		1	19311600	19311799
1	13166800	13168199		1	50176400	50176799		1	9699200	9699399		1	15554200	15555399		1	16350400	16350599		1	12349000	12349199		1	19364800	19364999
1	13196600	13196799		1	50191400	50193599		1	9713000	9713399		1	15642400	15642599		1	16414000	16415199		1	12358600	12359399		1	19484400	19485799
1	13251200	13251399		1	50210400	50210799		1	9725800	9726199		1	15728000	15728199		1	16451000	16451999		1	12470600	12471599		1	19568800	19569199
1	13389000	13389399		1	50377800	50380799		1	9796800	9797199		1	15943200	15943399		1	16478400	16478599		1	12847400	12847799		1	19711800	19712599
1	13410400	13410599		1	50510200	50512599		1	9800200	9801399		1	16077000	16077399		1	16503400	16503599		1	12883800	12884199		1	19897000	19897399
1	13437600	13437799		1	50623400	50624199		1	9830000	9830199		1	16079400	16079599		1	16515800	16516799		1	12896800	12896999		1	19931400	19931999
1	13455400	13455599		1	50793400	50794399		1	9841200	9841399		1	16202200	16202399		1	16578400	16578599		1	12945600	12945999		1	19974000	19975399
1	13491600	13491799		1	50958600	50961799		1	9904800	9905399		1	16301600	16301799		1	16665200	16665399		1	12975000	12975199		1	20069400	20069599
1	13564200	13564399		1	50980400	50981199		1	9959800	9960599		1	16454000	16454199		1	16680600	16680999		1	12981400	12981799		1	20167000	20167199
1	13653000	13653199		1	51051400	51051799		1	10018200	10019199		1	16483200	16483399		1	16749400	16749599		1	13001600	13001999		1	20171200	20171599
1	13680200	13680799		1	51231800	51232599		1	10102200	10102399		1	16611800	16611999		1	16797400	16797599		1	13023200	13023599		1	20177000	20177399
1	13689200	13689399		1	51307400	51307599		1	10145000	10145199		1	16679000	16679399		1	16898600	16898999		1	13039400	13040399		1	20342800	20343399
1	13740600	13740799		1	51504800	51505199		1	10172800	10172999		1	16823800	16823999		1	17097000	17097799		1	13060800	13060999		1	20410800	20410999
1	13754000	13754199		1	51564200	51565199		1	10251200	10251599		1	16826400	16826599		1	17286000	17286399		1	13147600	13147999		1	20467800	20469199
1	13907200	13907399		1	51875000	51875399		1	10299200	10299399		1	16889600	16889799		1	17587400	17587599		1	13180200	13181799		1	20732600	20732999
1	14021600	14021799		1	52055400	52056599		1	10302600	10303599		1	17028600	17028999		1	17634000	17634399		1	13200400	13201599		1	20763600	20763999
1	14050800	14050999		1	52095800	52096999		1	10323000	10323199		1	17089200	17089399		1	17666000	17666999		1	13231800	13232599		1	20868600	20868799
1	14076800	14076999		1	52323800	52323999		1	10332000	10332199		1	17202600	17203599		1	17810800	17811199		1	13316800	13317399		1	20869600	20869999
1	14078800	14079199		1	52907000	52908999		1	10354200	10355199		1	17228000	17228399		1	17829000	17830399		1	13344000	13344199		1	20974600	20975799
1	14128400	14128599		1	52989200	52989399		1	10420200	10420999		1	17298400	17298799		1	18143800	18143999		1	13479800	13481399		1	21021800	21023399
1	14178600	14178799		1	53044000	53045599		1	10431600	10432599		1	17322800	17323999		1	18179800	18179999		1	13538000	13538599		1	21224000	21224599
1	14205800	14206199		1	53089000	53089599		1	10442000	10442599		1	17359200	17359999		1	18234200	18234599		1	13591800	13593199		1	21231200	21231399
1	14262200	14262399		1	53325800	53326999		1	10452200	10452399		1	17397200	17397399		1	18267200	18267399		1	13602200	13602599		1	21402600	21403799
1	14333600	14333999		1	53755400	53757199		1	10463400	10463599		1	17508400	17508799		1	18417800	18417999		1	13604600	13604999		1	21411400	21412399
1	14360600	14360999		1	54301600	54304799		1	10482000	10482199		1	17622600	17623799		1	18549400	18549799		1	13646800	13648199		1	21423600	21423999
1	14455800	14455999		1	54357200	54358199		1	10489200	10489399		1	17670400	17670599		1	18593000	18593199		1	13675800	13676799		1	21466600	21466999
1	14584200	14584399		1	54458800	54461199		1	10494400	10494599		1	17716600	17716799		1	18616000	18616199		1	13740600	13741199		1	21479800	21480199
1	14599200	14599799		1	54515800	54516399		1	10502600	10503599		1	17857600	17857799		1	18975000	18975199		1	13901400	13901599		1	21571400	21572999
1	14643800	14643999		1	54572200	54572799		1	10576000	10576399		1	17893000	17893399		1	19048800	19049199		1	13935200	13935399		1	21601600	21601999
1	14644800	14644999		1	54861000	54861399		1	10580200	10581199		1	17908200	17909999		1	19175200	19175599		1	13983600	13983799		1	21616600	21617199
1	14651400	14651599		1	55186800	55186999		1	10661000	10662199		1	17956200	17957199		1	19311600	19311799		1	14008600	14010399		1	21876800	21878199
1	14836400	14836799		1	55518000	55518199		1	10680800	10681199		1	17961200	17961599		1	19550200	19550399		1	14079200	14080399		1	21961800	21963399
1	14841600	14841999		1	55909800	55910999		1	10684800	10684999		1	18124800	18125799		1	19644400	19645399		1	14200000	14201399		1	21993600	21993999
1	14858800	14858999		1	55995000	55995999		1	10728200	10728399		1	18222200	18222599		1	19950800	19952399		1	14228000	14228599		1	22172400	22173199
1	14999600	14999799		1	56294000	56294399		1	10844800	10844999		1	18296800	18297199		1	20047400	20047999		1	14241200	14242599		1	22288600	22288999
1	15043400	15043799		1	56524200	56526199		1	10898400	10898999		1	18370200	18370599		1	20058400	20058599		1	14348000	14348799		1	22305400	22305999
1	15055200	15055399		1	56880400	56881799		1	10939200	10939599		1	18605600	18606199		1	20059600	20059999		1	14386200	14387399		1	22377000	22377199
1	15056600	15056799		1	57259600	57260999		1	10950400	10950799		1	18717200	18718999		1	20087000	20087199		1	14407200	14407999		1	22386800	22387399
1	15057800	15057999		1	57371200	57372399		1	10963200	10963399		1	18746600	18746799		1	20122200	20123199		1	14457400	14457599		1	22470400	22471399
1	15141800	15141999		1	57415400	57415599		1	11067600	11067799		1	18799000	18799199		1	20166600	20167999		1	14461200	14461799		1	22510200	22510399
1	15164800	15164999		1	57425200	57425399		1	11112800	11113199		1	18814600	18814799		1	20220400	20220999		1	14496400	14496799		1	22554800	22555999
1	15209400	15209599		1	57862600	57863199		1	11123000	11125199		1	18867400	18867799		1	20409800	20409999		1	14501800	14502799		1	22776400	22776999
1	15253600	15253799		1	58235800	58236399		1	11134400	11136399		1	18991600	18992599		1	20410800	20410999		1	14506400	14506599		1	23089400	23089799
1	15364200	15364599		1	58386200	58386399		1	11137600	11138799		1	19019000	19019199		1	20415000	20416199		1	14555600	14555999		1	23145600	23146599
1	15372800	15373199		1	58446200	58448599		1	11147000	11147399		1	19091200	19091399		1	20466200	20467799		1	14682800	14683399		1	23257000	23257199
1	15375200	15375399		1	58712800	58713199		1	11165200	11166399		1	19102400	19102599		1	20487400	20487799		1	14699400	14699599		1	23583200	23583599
1	15412600	15412799		1	58724400	58724599		1	11170800	11170999		1	19186200	19186399		1	20570800	20571399		1	14713600	14715599		1	23694800	23695199
1	15528800	15528999		1	58826600	58826799		1	11248000	11248399		1	19229600	19230799		1	20628400	20628599		1	14733800	14734399		1	23796000	23796399
1	15717200	15717399		1	59668600	59669799		1	11280000	11280999		1	19390000	19390399		1	20680600	20681199		1	14751800	14752199		1	23978400	23978599
1	15781400	15782399		1	59927000	59927599		1	11299600	11300599		1	19416600	19416799		1	20733400	20733599		1	14811600	14812399		1	23995200	23995599
1	15808200	15808399		1	60351600	60352599		1	11335200	11336999		1	19519400	19519799		1	20744200	20744599		1	14844800	14845599		1	24013400	24014999
1	15817200	15817399		1	60496000	60497399		1	11341200	11342399		1	19541200	19542399		1	20824600	20824799		1	15009600	15010599		1	24016200	24016799
1	15833600	15833799		1	60505400	60505999		1	11349600	11350199		1	19548600	19548799		1	20997600	20998399		1	15034800	15035399		1	24019600	24020399
1	16010800	16010999		1	60830200	60830599		1	11353000	11354599		1	19644000	19644199		1	21010000	21010199		1	15092800	15094799		1	24037000	24037599
1	16063000	16063199		1	60931800	60932399		1	11356800	11357599		1	19776800	19777199		1	21024600	21024999		1	15107200	15108399		1	24064200	24064799
1	16064000	16064199		1	61025800	61027599		1	11381400	11381799		1	19789600	19789799		1	21080400	21080599		1	15187600	15188999		1	24123000	24123599
1	16082400	16082599		1	61096400	61097799		1	11408600	11409399		1	19792200	19792399		1	21107800	21108199		1	15226200	15228399		1	24188800	24190599
1	16103400	16103599		1	61259400	61259999		1	11412200	11412599		1	19921000	19921199		1	21479200	21479399		1	15281400	15281799		1	24257200	24257599
1	16140400	16140599		1	61283800	61284399		1	11452800	11453999		1	19991600	19992799		1	21638200	21639199		1	15291200	15292199		1	24305800	24307999
1	16257000	16257199		1	61724000	61724799		1	11470400	11470599		1	20057800	20057999		1	21644000	21644399		1	15305000	15306399		1	24545000	24545399
1	16261200	16261399		1	61974400	61976399		1	11506800	11507199		1	20105000	20106199		1	21714400	21714999		1	15385800	15387599		1	24603800	24604199
1	16263200	16264399		1	62033200	62033999		1	11538800	11539999		1	20252200	20252999		1	21757400	21757999		1	15440600	15441999		1	24684000	24684399
1	16266000	16266199		1	62128000	62129799		1	11578800	11578999		1	20259000	20259399		1	21873200	21874199		1	15555000	15555799		1	24717800	24717999
1	16321200	16321599		1	62203400	62204799		1	11640400	11641199		1	20272600	20272799		1	22002000	22002199		1	15571800	15573599		1	24775800	24775999
1	16389200	16389399		1	62280600	62282599		1	11736200	11737599		1	20361400	20361799		1	22019000	22019199		1	15590200	15590799		1	24987400	24988599
1	16569000	16569199		1	62353400	62353799		1	11755400	11756399		1	20369400	20369799		1	22261000	22261199		1	15754200	15755599		1	25215400	25215799
1	16628600	16628799		1	62403600	62404599		1	11823400	11823999		1	20661400	20661799		1	22264200	22264599		1	15838400	15838799		1	25498400	25498799
1	16675600	16675999		1	62691400	62692799		1	11825600	11825999		1	20849200	20849799		1	22292800	22292999		1	15941200	15942599		1	25563600	25564199
1	16678000	16678199		1	62851800	62854599		1	11881800	11882199		1	20851400	20851999		1	22482400	22482599		1	15982600	15983599		1	25568400	25568999
1	16697400	16697799		1	63012800	63012999		1	11896200	11896599		1	20859000	20859199		1	22572200	22573399		1	16009200	16009399		1	25586600	25587199
1	16750800	16750999		1	63183400	63183599		1	11900600	11901999		1	20991400	20991599		1	22619600	22619999		1	16026200	16026399		1	25658600	25659199
1	16765000	16765399		1	63651400	63652399		1	11925000	11925199		1	21126400	21126599		1	22650200	22650599		1	16068000	16069599		1	25833600	25833999
1	16770400	16770599		1	63718800	63718999		1	11932200	11932999		1	21130200	21130599		1	22863400	22863799		1	16091600	16093199		1	25955000	25956599
1	16921400	16922199		1	63726200	63726399		1	11951000	11951199		1	21172000	21172399		1	22874400	22874599		1	16112800	16113599		1	26035200	26035599
1	17071200	17071799		1	64113200	64114399		1	11990600	11990799		1	21205800	21205999		1	22893600	22893799		1	16144200	16145199		1	26039000	26039399
1	17147800	17147999		1	64136800	64136999		1	12004600	12004799		1	21275800	21275999		1	22973600	22973799		1	16152600	16152799		1	26059200	26059999
1	17231600	17231799		1	64429600	64429799		1	12011200	12011799		1	21306000	21306799		1	23141600	23141799		1	16159000	16159799		1	26061800	26062199
1	17300200	17300399		1	65343200	65344399		1	12012600	12013599		1	21406200	21406399		1	23151000	23152199		1	16244200	16244599		1	26237800	26239399
1	17324600	17324799		1	65568200	65568999		1	12031800	12032599		1	21413000	21413399		1	23230800	23231399		1	16297400	16297599		1	26468600	26469799
1	17336000	17336199		1	65627000	65627199		1	12059000	12059199		1	21471000	21471599		1	23234800	23234999		1	16343200	16343599		1	26562400	26562599
1	17426800	17426999		1	65805000	65806399		1	12091000	12091199		1	21526400	21526599		1	23287600	23287799		1	16466800	16467399		1	26678600	26679199
1	17507400	17507599		1	65874000	65875599		1	12100000	12100799		1	21612200	21613599		1	23350000	23351199		1	16478400	16479199		1	26854600	26854999
1	17510600	17510799		1	65891800	65893999		1	12120800	12121999		1	21621000	21621399		1	23382800	23382999		1	16488000	16489399		1	26890200	26891399
1	17575800	17575999		1	66209600	66210599		1	12175000	12175199		1	21659800	21659999		1	23498400	23498599		1	16516600	16516799		1	26989800	26990599
1	17786600	17787999		1	66219800	66219999		1	12199800	12199999		1	21748000	21748199		1	23527600	23527799		1	16542200	16542399		1	27308200	27308799
1	17804000	17804199		1	66288600	66289199		1	12252000	12252399		1	21773600	21774799		1	23551600	23551799		1	16544600	16544799		1	27436000	27436399
1	17856000	17856199		1	66373400	66373799		1	12299800	12299999		1	21842200	21842399		1	23576800	23576999		1	16564200	16564399		1	27518200	27519799
1	17858200	17858399		1	66589000	66591599		1	12302000	12302199		1	21845800	21846199		1	23613200	23613599		1	16574600	16574999		1	27575600	27576399
1	17880000	17880599		1	66630800	66631599		1	12308200	12308399		1	21993000	21993399		1	23685800	23685999		1	16629400	16629799		1	27703800	27704199
1	17905800	17905999		1	66884200	66885399		1	12328800	12328999		1	22035800	22035999		1	23693600	23693799		1	16632400	16633999		1	27746000	27746399
1	17999400	17999599		1	66896600	66897199		1	12413400	12413599		1	22190600	22190999		1	23711400	23711599		1	16645200	16645399		1	27824200	27825199
1	18170600	18170799		1	67514800	67516399		1	12519200	12519799		1	22247000	22247599		1	23722400	23722599		1	16692600	16693999		1	28035600	28035799
1	18278800	18278999		1	67610400	67612799		1	12522400	12523599		1	22254600	22255199		1	23724400	23724599		1	16709600	16709999		1	28064400	28065399
1	18297000	18297199		1	67648800	67650399		1	12525400	12527199		1	22358800	22359199		1	23827400	23827599		1	16719800	16720999		1	28089800	28090399
1	18468200	18468399		1	67657800	67659599		1	12561000	12561399		1	22529000	22529999		1	23854000	23854199		1	16815600	16816199		1	28137200	28137799
1	18505400	18505599		1	67826000	67826199		1	12632800	12633199		1	22541000	22541399		1	24076200	24076399		1	16830600	16830999		1	28253000	28253599
1	18514400	18514599		1	67970800	67971199		1	12642000	12643199		1	22651200	22652599		1	24101200	24101599		1	16934000	16934399		1	28471200	28471399
1	18521600	18521799		1	67995600	67995799		1	12652600	12652799		1	22718400	22720599		1	24112800	24113399		1	16939200	16939999		1	28628200	28629999
1	18601800	18601999		1	68812600	68813199		1	12657400	12657999		1	22757400	22757599		1	24277200	24277399		1	17006200	17006799		1	28759800	28759999
1	18635200	18635399		1	68970000	68971199		1	12768000	12768199		1	22781600	22782399		1	24290800	24291199		1	17014000	17014599		1	28804400	28804799
1	18677600	18677799		1	69066000	69066199		1	12791600	12791799		1	22876600	22877399		1	24487200	24487599		1	17060800	17060999		1	28867600	28867999
1	18687800	18687999		1	69120800	69121799		1	12803600	12803799		1	22955200	22956199		1	24552800	24553199		1	17107200	17107999		1	28917000	28917399
1	18750600	18750799		1	69157600	69157999		1	12808200	12809199		1	23002400	23002799		1	24682600	24682799		1	17159600	17159999		1	28973000	28973399
1	18769400	18769599		1	69507200	69508799		1	12856200	12856399		1	23006600	23006999		1	24684000	24684399		1	17300800	17302599		1	28974600	28974999
1	18778400	18778599		1	69665800	69667599		1	12890200	12890799		1	23161800	23162199		1	24729000	24729599		1	17380000	17380399		1	28976800	28976999
1	18786400	18786599		1	69706800	69708599		1	12905200	12905799		1	23209600	23209799		1	24735400	24735799		1	17404600	17404999		1	29083000	29083399
1	18788400	18788599		1	69755000	69755599		1	12913600	12913799		1	23210600	23210999		1	24767400	24767599		1	17456200	17457399		1	29107400	29107799
1	19009200	19009399		1	69790800	69792199		1	12966800	12967199		1	23263600	23263799		1	24768600	24768999		1	17506400	17506999		1	29573600	29573799
1	19041800	19041999		1	69797400	69797999		1	13068200	13068399		1	23309000	23309199		1	24918400	24918599		1	17513400	17513599		1	29823600	29824199
1	19054600	19054799		1	70108800	70108999		1	13149200	13149999		1	23322800	23322999		1	24976200	24976599		1	17517200	17518599		1	29840600	29841399
1	19056200	19056399		1	70653000	70654399		1	13231200	13231599		1	23416800	23416999		1	25108000	25108599		1	17521000	17521799		1	29911400	29912399
1	19070000	19070199		1	71189400	71191799		1	13265400	13265799		1	23462200	23462399		1	25179600	25180799		1	17535000	17535999		1	29998600	29998999
1	19121400	19121799		1	71332200	71333399		1	13327000	13327199		1	23516200	23517199		1	25294000	25294399		1	17573600	17573999		1	30025800	30026199
1	19173600	19173999		1	71413000	71414599		1	13378400	13378599		1	23589000	23590799		1	25304000	25304199		1	17603800	17604199		1	30111400	30111599
1	19235400	19235799		1	71470800	71472799		1	13602200	13602399		1	23626200	23626399		1	25413600	25413799		1	17678800	17678999		1	30159400	30159999
1	19245400	19245599		1	71508400	71508599		1	13640000	13640199		1	23896800	23896999		1	25414800	25415799		1	17692000	17692999		1	30571800	30571999
1	19274600	19274799		1	71526800	71530199		1	13653600	13653799		1	24051600	24052599		1	25474400	25474599		1	17731800	17733199		1	30577200	30577599
1	19334800	19335399		1	71811000	71811399		1	13712000	13712199		1	24082400	24082599		1	25481800	25482199		1	17795400	17795999		1	30624000	30624199
1	19337800	19337999		1	71824600	71826599		1	13714800	13714999		1	24112800	24112999		1	25498200	25498399		1	17854800	17856199		1	30775800	30776199
1	19362800	19362999		1	71872600	71873199		1	13737600	13738199		1	24207400	24208199		1	25551600	25552599		1	17872600	17875599		1	30925200	30925599
1	19383800	19384599		1	71998800	71998999		1	13753000	13754999		1	24264000	24264399		1	25612200	25613399		1	17931800	17932399		1	31127000	31127399
1	19454800	19455799		1	72158800	72160399		1	13912600	13912799		1	24431200	24432599		1	25618400	25618999		1	17977600	17978999		1	31233800	31233999
1	19472200	19472399		1	72469600	72470199		1	13916400	13916599		1	24477400	24478399		1	25642000	25642399		1	18012200	18012599		1	31248400	31249599
1	19546800	19546999		1	72553800	72554799		1	13921400	13921599		1	24529800	24529999		1	25689600	25689799		1	18046600	18047599		1	31576600	31576999
1	19727400	19727599		1	72897800	72899999		1	13935200	13935399		1	24543400	24543599		1	25722400	25722999		1	18119800	18120399		1	31925600	31925999
1	19980400	19980599		1	73064000	73064199		1	13988800	13988999		1	24684000	24684199		1	25833400	25833599		1	18146200	18146599		1	31994000	31994399
1	19991400	19991599		1	73361200	73361999		1	14001800	14002599		1	24771000	24771199		1	25852200	25852399		1	18189800	18190999		1	32213400	32213599
1	20413600	20413799		1	73664400	73665199		1	14005800	14006599		1	24858200	24859399		1	26002600	26002999		1	18201200	18202199		1	32229200	32229799
1	20483600	20483799		1	73738400	73739199		1	14018000	14018199		1	24945000	24945999		1	26072000	26072199		1	18233800	18234799		1	32415400	32415799
1	20496600	20497199		1	74117800	74118999		1	14026400	14027399		1	24988000	24988399		1	26170000	26170399		1	18352200	18353399		1	32420800	32421199
1	20611600	20611799		1	74454600	74454799		1	14051200	14051399		1	25027600	25027799		1	26190000	26190399		1	18358600	18359399		1	32449200	32449599
1	20699200	20699399		1	74900000	74900199		1	14053000	14053199		1	25067200	25067399		1	26263200	26263799		1	18432600	18434599		1	32479800	32480199
1	20802400	20802599		1	75868600	75868799		1	14153200	14153599		1	25111600	25111799		1	26394200	26394799		1	18443600	18444799		1	32801600	32802199
1	20811400	20811599		1	75934400	75934599		1	14190400	14190799		1	25114600	25115799		1	26450600	26450799		1	18483000	18483599		1	32876200	32878399
1	20813600	20813799		1	76044200	76044599		1	14215000	14215799		1	25152800	25153399		1	26873200	26873999		1	18509400	18509799		1	33041600	33042599
1	20833200	20833399		1	76490600	76490799		1	14249400	14249799		1	25197400	25198199		1	26999800	27000199		1	18549200	18551199		1	33075200	33075599
1	20907400	20907599		1	76689800	76690799		1	14291800	14291999		1	25223400	25223799		1	27003600	27003799		1	18572400	18572599		1	33265800	33266199
1	20929000	20929199		1	76925800	76925999		1	14315600	14315999		1	25262800	25262999		1	27113400	27113799		1	18636000	18636199		1	33322200	33322599
1	20976400	20976599		1	76949200	76949599		1	14325000	14326599		1	25470600	25471799		1	27304000	27304199		1	18644000	18644199		1	33332000	33333199
1	20998600	20998799		1	77312600	77313199		1	14338200	14338599		1	25587400	25587799		1	27426200	27427199		1	18674400	18676199		1	33499200	33499399
1	21048200	21049199		1	77424400	77426199		1	14370600	14370799		1	25623400	25623599		1	27433600	27433999		1	18685600	18686999		1	33507200	33507799
1	21070200	21070599		1	77531400	77531599		1	14444000	14444399		1	25638000	25638199		1	27527000	27527199		1	18695800	18697399		1	33528600	33528999
1	21190600	21190799		1	77624800	77625399		1	14448000	14448799		1	25677800	25679199		1	27601200	27601399		1	18708400	18708999		1	33600600	33600999
1	21195200	21195599		1	77849200	77849399		1	14501200	14502199		1	25686000	25687599		1	27624000	27624399		1	18736000	18736999		1	33616400	33617599
1	21205600	21207599		1	78783400	78784999		1	14512400	14512599		1	25749800	25749999		1	27638800	27639999		1	18753200	18754399		1	33663800	33663999
1	21311400	21311799		1	78905400	78906199		1	14566400	14566799		1	25790200	25790399		1	27678400	27678799		1	18798400	18798999		1	33751800	33752999
1	21394400	21394599		1	80551400	80552599		1	14587600	14587999		1	25922200	25922399		1	27918400	27918799		1	18838400	18838599		1	33940000	33940199
1	21466200	21466399		1	80573800	80575199		1	14630400	14630799		1	25945400	25945599		1	27936600	27936999		1	18866600	18866799		1	33999200	33999799
1	21497000	21497199		1	80599800	80600999		1	14634000	14634199		1	25974000	25974399		1	27950200	27951399		1	18982400	18982599		1	34066400	34066799
1	21572800	21573399		1	81153000	81153199		1	14642800	14642999		1	26077400	26079399		1	27979600	27979799		1	19016200	19016599		1	34077000	34078399
1	21712000	21712199		1	81187000	81187599		1	14697200	14697399		1	26096000	26096599		1	27993600	27993799		1	19077000	19077999		1	34144200	34144799
1	21713200	21713399		1	81340600	81341599		1	14733000	14733199		1	26101000	26102199		1	28046800	28047399		1	19109200	19110399		1	34218200	34218599
1	21720400	21720599		1	81906800	81907599		1	14744200	14744599		1	26105200	26105399		1	28092000	28092599		1	19162400	19164599		1	34230200	34230799
1	21764200	21764399		1	82031400	82031999		1	14829200	14829399		1	26192400	26192799		1	28121800	28121999		1	19215000	19216199		1	34270400	34270799
1	21771600	21771799		1	82050000	82050199		1	14976600	14976799		1	26213600	26215199		1	28254600	28254999		1	19221600	19222799		1	34286600	34286799
1	21789400	21790799		1	82150800	82151999		1	15044600	15046199		1	26220800	26220999		1	28270800	28271599		1	19248400	19249399		1	34395800	34396199
1	21816800	21816999		1	82352400	82352599		1	15121200	15121599		1	26256000	26256399		1	28421200	28421799		1	19311600	19311799		1	34424400	34426399
1	21833200	21833399		1	82354400	82355599		1	15122400	15123599		1	26261200	26262399		1	28721800	28722399		1	19314400	19314599		1	34541000	34542199
1	21900600	21900799		1	82448600	82449199		1	15136400	15136999		1	26275600	26276799		1	28730600	28731199		1	19387000	19387599		1	34585400	34585599
1	21931400	21931599		1	82747000	82747599		1	15154600	15154799		1	26399800	26400599		1	28777200	28777399		1	19419000	19419599		1	34601400	34601599
1	21960000	21960199		1	82956200	82956599		1	15161200	15161399		1	26568200	26568999		1	28801600	28801999		1	19457000	19457199		1	34634600	34635799
1	21976600	21976799		1	83273000	83273399		1	15249600	15249799		1	26645200	26645399		1	28895000	28895599		1	19520000	19520399		1	34656600	34657199
1	22015600	22015799		1	83309600	83309999		1	15281400	15282199		1	26655000	26655199		1	29108400	29108599		1	19551800	19552399		1	34676400	34676999
1	22167600	22168399		1	83379400	83381999		1	15406000	15406399		1	26676400	26677399		1	29194200	29194399		1	19643000	19643399		1	34695800	34696799
1	22178800	22178999		1	83610400	83611599		1	15416400	15419199		1	26696200	26697199		1	29213000	29214799		1	19655200	19655799		1	34731600	34731799
1	22260600	22260799		1	83643000	83644999		1	15424600	15424799		1	26809800	26810399		1	29236000	29237199		1	19752600	19752999		1	34795600	34796399
1	22270800	22270999		1	83772200	83772599		1	15555400	15555799		1	26826400	26827399		1	29346200	29346599		1	19777800	19778399		1	34836200	34837799
1	22279000	22279399		1	83779400	83780999		1	15560800	15561199		1	26955600	26955999		1	29412800	29412999		1	19829600	19830199		1	34842400	34842599
1	22313200	22313399		1	83961000	83962599		1	15575600	15575999		1	27016400	27016599		1	29422400	29422599		1	19978800	19980199		1	34986000	34986399
1	22362200	22362399		1	83994000	83994399		1	15593000	15593399		1	27107800	27107999		1	29636400	29636599		1	19982400	19983199		1	35078000	35078399
1	22467200	22467399		1	84432400	84432799		1	15608400	15608599		1	27119600	27120399		1	29697600	29700399		1	20044200	20044399		1	35177600	35179599
1	22516000	22516199		1	84735000	84736599		1	15628800	15629199		1	27171200	27172199		1	29709800	29710999		1	20046200	20046599		1	35356000	35356599
1	22610400	22610599		1	84800800	84802599		1	15651600	15651799		1	27189000	27189399		1	29779000	29780599		1	20108200	20108999		1	35747600	35747999
1	22618600	22619599		1	84841600	84841799		1	15688200	15689399		1	27243200	27243399		1	29794200	29794399		1	20114800	20115199		1	35844200	35844399
1	22708400	22708599		1	86004400	86004599		1	15719400	15719599		1	27244800	27245599		1	29859200	29859599		1	20137400	20138399		1	36004400	36005399
1	22834400	22834599		1	86093000	86093999		1	15728000	15728199		1	27257000	27257199		1	30145600	30146199		1	20170000	20170999		1	36037400	36039199
1	22952400	22953199		1	86287800	86288199		1	15732600	15732799		1	27276400	27277599		1	30237400	30237799		1	20241000	20241599		1	36076000	36076399
1	23094200	23094599		1	86586000	86586399		1	15757000	15757799		1	27312800	27313999		1	30424400	30424599		1	20260800	20260999		1	36082600	36083799
1	23138200	23138399		1	86743400	86745799		1	15790200	15790599		1	27358400	27358799		1	30589800	30589999		1	20264800	20265799		1	36109000	36109399
1	23208000	23208199		1	86831600	86832999		1	15844600	15846199		1	27381600	27381799		1	30591400	30591599		1	20284400	20284799		1	36141200	36141799
1	23209400	23209599		1	87459000	87459199		1	15944800	15945199		1	27411400	27412399		1	30729200	30729399		1	20521000	20521599		1	36205600	36206199
1	23219000	23219199		1	87670400	87671999		1	15971800	15972199		1	27417000	27417199		1	30792400	30792799		1	20574200	20574399		1	36286600	36287999
1	23410800	23411599		1	87976200	87977399		1	16005000	16005399		1	27445200	27446199		1	30892800	30892999		1	20583800	20585199		1	36291000	36291599
1	23416400	23416999		1	88076800	88077199		1	16007400	16007799		1	27491600	27492599		1	30917400	30917599		1	20627200	20628399		1	36440000	36440199
1	23473800	23473999		1	88216600	88217799		1	16011800	16012799		1	27698000	27698199		1	30920400	30920799		1	20657000	20658399		1	36441000	36441599
1	23527600	23527799		1	88219400	88222599		1	16024600	16024799		1	27716800	27718199		1	30991200	30991599		1	20664000	20664399		1	36513200	36513799
1	23534800	23534999		1	88252400	88253999		1	16071000	16071199		1	27744400	27744599		1	31119400	31119799		1	20821000	20821999		1	36522400	36522799
1	23568400	23568599		1	88278000	88279999		1	16153600	16153799		1	27790000	27791799		1	31129800	31129999		1	20912600	20913599		1	36628600	36628999
1	23645200	23645399		1	88289000	88291599		1	16195000	16196199		1	27833600	27834599		1	31144600	31144799		1	20921800	20922199		1	36632800	36634599
1	23795000	23795199		1	88308600	88310199		1	16212400	16212799		1	27886000	27886199		1	31159000	31159399		1	20968400	20968799		1	36709800	36710199
1	23873400	23873799		1	88559000	88559599		1	16232400	16233199		1	27939800	27939999		1	31177400	31177599		1	20969800	20970399		1	36719200	36719599
1	23945400	23945599		1	88750800	88751999		1	16279000	16279999		1	27995000	27995799		1	31230800	31230999		1	21048400	21048599		1	36737200	36737599
1	23951600	23951799		1	89034000	89034399		1	16292800	16293599		1	28017400	28017799		1	31301200	31301399		1	21133200	21133599		1	36766400	36766799
1	23972200	23972399		1	89063600	89064199		1	16321800	16322199		1	28027600	28027799		1	31328200	31328399		1	21162000	21162799		1	36803400	36803599
1	24013200	24013399		1	89390800	89390999		1	16349400	16349799		1	28039800	28039999		1	31650400	31650799		1	21252000	21252399		1	36836200	36836999
1	24047000	24047599		1	89411400	89411999		1	16444200	16445199		1	28050200	28050399		1	31683600	31683799		1	21254200	21255799		1	36854000	36854399
1	24073000	24073199		1	89503600	89504399		1	16522000	16522199		1	28056200	28057599		1	31741800	31741999		1	21591000	21591599		1	36940000	36941399
1	24161600	24161999		1	90130200	90130399		1	16767000	16767799		1	28069400	28070199		1	31743200	31743799		1	21682400	21682799		1	36965800	36966399
1	24174200	24174399		1	90714000	90715199		1	16786800	16787199		1	28101200	28101399		1	31752800	31752999		1	21698200	21698799		1	36996600	36996999
1	24264200	24264399		1	90812200	90812399		1	16796600	16796799		1	28131200	28131399		1	31764600	31764799		1	21707200	21707799		1	37070200	37070599
1	24334600	24334999		1	91296800	91297599		1	16859200	16859399		1	28138000	28138199		1	31922600	31922799		1	21746000	21746399		1	37102600	37102799
1	24374400	24375399		1	92620600	92620799		1	16900200	16900999		1	28168400	28169799		1	31972600	31972799		1	21748800	21751599		1	37120000	37120199
1	24422800	24422999		1	92792000	92792399		1	16910000	16910199		1	28198400	28198599		1	32133000	32133399		1	21780400	21781199		1	37175000	37175199
1	24450800	24450999		1	92891000	92892199		1	16964000	16964799		1	28253600	28254799		1	32330800	32330999		1	21789200	21790199		1	37198200	37198399
1	24543800	24543999		1	93370800	93371999		1	17014200	17014799		1	28326800	28326999		1	32391400	32391599		1	21810000	21810399		1	37243600	37243799
1	24618400	24618599		1	93493800	93495399		1	17032000	17032199		1	28388800	28390799		1	32519800	32520199		1	21837600	21838399		1	37305600	37305999
1	24620800	24621799		1	93520800	93521999		1	17035000	17035599		1	28439400	28439799		1	32534600	32534999		1	21903000	21904399		1	37335000	37335599
1	24684000	24684399		1	94423000	94423799		1	17052800	17053399		1	28468400	28468599		1	32605800	32606399		1	21906000	21907199		1	37461600	37463199
1	24703400	24703799		1	94445000	94445799		1	17056200	17056999		1	28488200	28488399		1	32659000	32659599		1	21969800	21971599		1	37486000	37486399
1	24719200	24719399		1	94773600	94774599		1	17061800	17062199		1	28654000	28654199		1	32885800	32885999		1	21979800	21980199		1	37492000	37492799
1	24730200	24730399		1	94965200	94966999		1	17108800	17109199		1	28782600	28782999		1	33100400	33100799		1	21993000	21994199		1	37549400	37549999
1	24750800	24750999		1	95173600	95174999		1	17173400	17173599		1	28792000	28792399		1	33128600	33128799		1	22124200	22125599		1	37691600	37691999
1	24799200	24799599		1	95223600	95225599		1	17194600	17194999		1	28799600	28799799		1	33227800	33227999		1	22214800	22215999		1	37718000	37718599
1	24835600	24835799		1	96275400	96276199		1	17240400	17240999		1	28869800	28870799		1	33262000	33262399		1	22280400	22280599		1	37720200	37721199
1	24845400	24845599		1	96293600	96293799		1	17241800	17242999		1	28958400	28958599		1	33306400	33306599		1	22308800	22310799		1	37738000	37738799
1	24966000	24966599		1	96485400	96486799		1	17244000	17244199		1	28990000	28990199		1	33338200	33338599		1	22312200	22312399		1	37861800	37862399
1	25054000	25054399		1	96756400	96757599		1	17287600	17287799		1	28994400	28994999		1	33400200	33400599		1	22336400	22336799		1	37879200	37879599
1	25057400	25057599		1	97003600	97005599		1	17432000	17432799		1	28996000	28996199		1	33588200	33588399		1	22358800	22359399		1	37894200	37894799
1	25064600	25064799		1	97096800	97097999		1	17443200	17443399		1	29023800	29023999		1	33600000	33600799		1	22393600	22394399		1	37966800	37967199
1	25108800	25108999		1	97109200	97109399		1	17486200	17486999		1	29134800	29135799		1	33636600	33636799		1	22413800	22414199		1	38007600	38007999
1	25163000	25163199		1	97143000	97143999		1	17503800	17504399		1	29175800	29175999		1	33709600	33709999		1	22417200	22417999		1	38020400	38021399
1	25168200	25168399		1	97478000	97478799		1	17646600	17646999		1	29192200	29192599		1	33718800	33718999		1	22522800	22523199		1	38132400	38132799
1	25200800	25201199		1	97584000	97585999		1	17697000	17698399		1	29239600	29240599		1	33743400	33744199		1	22550600	22551799		1	38145000	38145199
1	25226800	25226999		1	97623600	97624199		1	17714200	17714399		1	29281200	29281399		1	33751800	33752799		1	22594400	22594599		1	38208400	38208599
1	25256400	25256599		1	97818800	97819399		1	17723200	17724799		1	29323200	29324399		1	33960600	33961399		1	22642600	22642999		1	38217200	38219199
1	25375600	25375799		1	98100400	98101199		1	17779200	17779999		1	29339600	29340799		1	33977600	33977799		1	22733000	22733199		1	38283400	38283999
1	25440800	25441399		1	98334800	98335599		1	17800800	17801399		1	29357600	29358799		1	34034200	34034399		1	22743400	22743799		1	38316600	38318399
1	25462200	25462399		1	98657600	98657999		1	17815200	17815999		1	29375800	29376199		1	34065000	34066199		1	22780200	22780399		1	38358800	38359399
1	25482600	25482799		1	98675000	98676199		1	17820600	17820999		1	29394200	29394399		1	34121400	34121799		1	22845000	22846199		1	38366600	38366999
1	25509600	25509799		1	98960400	98960999		1	17882400	17882799		1	29399200	29400999		1	34125000	34125599		1	22890200	22892599		1	38434200	38435399
1	25517200	25517399		1	99358600	99358799		1	17887400	17887999		1	29439600	29439799		1	34127800	34127999		1	22904400	22904799		1	38457200	38457799
1	25527000	25527199		1	99659400	99660599		1	17923000	17923199		1	29478600	29478799		1	34266600	34267199		1	22954200	22955199		1	38683200	38683999
1	25546400	25546599		1	100539200	100539599		1	17981200	17981399		1	29493200	29494199		1	34351800	34351999		1	22960600	22961799		1	38866400	38867799
1	25641400	25642599		1	100644600	100645599		1	17985000	17985199		1	29533400	29534599		1	34535200	34535599		1	22992600	22993199		1	38960200	38960599
1	25703600	25704799		1	101222600	101223199		1	18009400	18010599		1	29602600	29602799		1	34550800	34551199		1	23054200	23054599		1	38999200	38999599
1	25733000	25733399		1	101429600	101429999		1	18038800	18038999		1	29793400	29794199		1	34557400	34557599		1	23098400	23098999		1	39174200	39174599
1	25844600	25844799		1	101503200	101503599		1	18109400	18109599		1	29877400	29878799		1	34635400	34635799		1	23276600	23276999		1	39245200	39245599
1	25845800	25846199		1	101658800	101660399		1	18150400	18150599		1	29905600	29905999		1	34682800	34682999		1	23287600	23287799		1	39364800	39365199
1	25865200	25865399		1	102022200	102022599		1	18164400	18164599		1	29976000	29976199		1	34710800	34710999		1	23354200	23355799		1	39389400	39389799
1	25870000	25870199		1	102148200	102148399		1	18172600	18172799		1	29982800	29984999		1	34749000	34749199		1	23359000	23359399		1	39533200	39533399
1	25985200	25985399		1	102609800	102610199		1	18187000	18187199		1	30098800	30099999		1	34768800	34768999		1	23364200	23366799		1	39769200	39769399
1	25991800	25991999		1	102611000	102611199		1	18248800	18250399		1	30106200	30106399		1	34796200	34796399		1	23377000	23377199		1	39808800	39809199
1	26006200	26006399		1	102727000	102728599		1	18293200	18293599		1	30149600	30150799		1	34801600	34801799		1	23390200	23390799		1	39845400	39845799
1	26051600	26051799		1	102882800	102882999		1	18319200	18319999		1	30157600	30158799		1	34808600	34808999		1	23415200	23415599		1	39877200	39877999
1	26068400	26068599		1	103200000	103201199		1	18360400	18360599		1	30173200	30174599		1	34810400	34810599		1	23419200	23420599		1	39921400	39921599
1	26081800	26081999		1	103215200	103216999		1	18370200	18372199		1	30209000	30209199		1	34811800	34812199		1	23497600	23499799		1	39928400	39928999
1	26204000	26204199		1	103286000	103286599		1	18388400	18389199		1	30224600	30225399		1	34828800	34829199		1	23508000	23508599		1	39959200	39959599
1	26257200	26257999		1	103322400	103322599		1	18400800	18401999		1	30251600	30252599		1	34869400	34869799		1	23522400	23522799		1	39995200	39995599
1	26290400	26290599		1	103715200	103715599		1	18423600	18424399		1	30276000	30276199		1	34902400	34902799		1	23558800	23559199		1	40000800	40000999
1	26360600	26360799		1	104080400	104080799		1	18436800	18437199		1	30348000	30348199		1	34910200	34910399		1	23687000	23687399		1	40066000	40066399
1	26384800	26384999		1	104216600	104216999		1	18461400	18461999		1	30367400	30368399		1	34980600	34981599		1	23744400	23744999		1	40137600	40137799
1	26395600	26395799		1	104468800	104468999		1	18487000	18487599		1	30404400	30404799		1	34990600	34990799		1	23755800	23756399		1	40145000	40145199
1	26536600	26536799		1	104593600	104594999		1	18501000	18501199		1	30487000	30487799		1	35013000	35013199		1	23818800	23819599		1	40164200	40165799
1	26662000	26662199		1	104651600	104652399		1	18612200	18612999		1	30884200	30884399		1	35019800	35021199		1	23851200	23851599		1	40235400	40235799
1	26687800	26687999		1	104753600	104755399		1	18616200	18616399		1	31082600	31082799		1	35149600	35150199		1	23857600	23858799		1	40267000	40267399
1	26703800	26703999		1	104866600	104866799		1	18656400	18656999		1	31111400	31111599		1	35424600	35424799		1	23874000	23875399		1	40389600	40390399
1	26761400	26761599		1	105099400	105100599		1	18672600	18672799		1	31147000	31147799		1	35527000	35527199		1	23880400	23880799		1	40447400	40447599
1	26916800	26916999		1	105121200	105121399		1	18686800	18687199		1	31243600	31243799		1	35534800	35535199		1	23891600	23892399		1	40525200	40526199
1	26921200	26921599		1	105125800	105128199		1	18693000	18693199		1	31323200	31323999		1	35672600	35673799		1	23998600	23999999		1	40558800	40558999
1	26942400	26942599		1	105210000	105210599		1	18722800	18722999		1	31358200	31360799		1	35685800	35685999		1	24035600	24037199		1	40670600	40670799
1	27058600	27058999		1	105415800	105416799		1	18744600	18744799		1	31399400	31399799		1	35688000	35688399		1	24168000	24168599		1	40743600	40744399
1	27071800	27072199		1	106080800	106081799		1	18829200	18829399		1	31485200	31485399		1	35726600	35726999		1	24178800	24179399		1	40946800	40947199
1	27205800	27205999		1	106187000	106187799		1	18852400	18852799		1	31533200	31533399		1	35892200	35892399		1	24198400	24200199		1	41032200	41032399
1	27337600	27337799		1	106616000	106617399		1	18902400	18902599		1	31578000	31578399		1	35925400	35926599		1	24259600	24260799		1	41037600	41037799
1	27353800	27354199		1	106810400	106811599		1	18934800	18935199		1	31637200	31638199		1	35973800	35973999		1	24261800	24262399		1	41056800	41056999
1	27364800	27365199		1	107096200	107096599		1	18936000	18936399		1	31647600	31648199		1	36005400	36005599		1	24299200	24301599		1	41085400	41086199
1	27383800	27384199		1	107548800	107548999		1	18987000	18987399		1	31761200	31761399		1	36073000	36073999		1	24306000	24306599		1	41134800	41134999
1	27417600	27417999		1	107555800	107557599		1	19042400	19042599		1	31764400	31764599		1	36076800	36076999		1	24348000	24348399		1	41215800	41216199
1	27455600	27455799		1	107966400	107966799		1	19061200	19061399		1	31834600	31835199		1	36098200	36098399		1	24388000	24390799		1	41250600	41251199
1	27485400	27485799		1	108390200	108390599		1	19098200	19098999		1	31841800	31841999		1	36131800	36132199		1	24412800	24412999		1	41273800	41273999
1	27492400	27493199		1	108480200	108480999		1	19142200	19142399		1	31869400	31869599		1	36143000	36143799		1	24428600	24429399		1	41658200	41658599
1	27514000	27514199		1	109041400	109042599		1	19155000	19155199		1	31873400	31873599		1	36162800	36162999		1	24443000	24443399		1	41756800	41756999
1	27546600	27546999		1	109127200	109128199		1	19167800	19167999		1	31924800	31925599		1	36165600	36165999		1	24542600	24544199		1	41763200	41763599
1	27594400	27594599		1	109531800	109533199		1	19229600	19229799		1	31954600	31954799		1	36186400	36186999		1	24560000	24560199		1	41886800	41886999
1	27705000	27705999		1	109639200	109639399		1	19234400	19234799		1	32018400	32018799		1	36245000	36245399		1	24676400	24676999		1	42243200	42243399
1	27736800	27736999		1	110050800	110051199		1	19241200	19241399		1	32031000	32031199		1	36251000	36251799		1	24683400	24684199		1	42296400	42298799
1	27783600	27783799		1	110295400	110298199		1	19254800	19254999		1	32039000	32039199		1	36310200	36310399		1	24713200	24715199		1	42300800	42301399
1	27789400	27789799		1	110386600	110388199		1	19305400	19305799		1	32051800	32052799		1	36341600	36341799		1	24753400	24753599		1	42309400	42309999
1	27813000	27813199		1	110411400	110411599		1	19395200	19395399		1	32057600	32058199		1	36351800	36351999		1	24816000	24819199		1	42428600	42429399
1	27841000	27841199		1	110454000	110454999		1	19413400	19413599		1	32103600	32105199		1	36395400	36395799		1	24896600	24897399		1	42556000	42556399
1	27852400	27852799		1	110604400	110607599		1	19420400	19420599		1	32107400	32107999		1	36418200	36418399		1	24976800	24977199		1	42570200	42570599
1	27863000	27863199		1	110834400	110835999		1	19469800	19470599		1	32140000	32140799		1	36421000	36421199		1	25109000	25109799		1	42584000	42584199
1	27989400	27989599		1	111035400	111036399		1	19537200	19537399		1	32180800	32181799		1	36441200	36441399		1	25132800	25133999		1	42601200	42601799
1	28037400	28037599		1	111038000	111039199		1	19562800	19563999		1	32252800	32253999		1	36464400	36464999		1	25145400	25146399		1	42704800	42705399
1	28107600	28107799		1	111204400	111206199		1	19603200	19603999		1	32255600	32255999		1	36472000	36473799		1	25158400	25159799		1	42714400	42714599
1	28214400	28214599		1	111546600	111550999		1	19672200	19672399		1	32299400	32299599		1	36514000	36514599		1	25360200	25361399		1	42776000	42777599
1	28332400	28333199		1	111619200	111619999		1	19677800	19678199		1	32363400	32363799		1	36520200	36520999		1	25382400	25382999		1	43143000	43143199
1	28366800	28366999		1	112069200	112070199		1	19679000	19679199		1	32379600	32380799		1	36522000	36522799		1	25430600	25432199		1	43409400	43409599
1	28391000	28391999		1	112312000	112312999		1	19746000	19747399		1	32551200	32551599		1	36531400	36531599		1	25465400	25467199		1	43449400	43449799
1	28428200	28428399		1	112358400	112361199		1	19783600	19784199		1	32603000	32603199		1	36539600	36539999		1	25477200	25478399		1	43480800	43481399
1	28502800	28502999		1	113087000	113089999		1	19846800	19847199		1	32622800	32622999		1	36556000	36556199		1	25508800	25509999		1	43615600	43616199
1	28591400	28591599		1	113637200	113638999		1	19858400	19859199		1	32648000	32648199		1	36557400	36557799		1	25518000	25518599		1	43743800	43744999
1	28682400	28682599		1	113786400	113787799		1	19904000	19905799		1	32660600	32662799		1	36576400	36576599		1	25558400	25558999		1	43860200	43860599
1	28690800	28690999		1	113792600	113794199		1	19967800	19969199		1	32686400	32686799		1	36604400	36604599		1	25563200	25564399		1	43882800	43883399
1	28713600	28713799		1	113928000	113929199		1	20007800	20008799		1	32706000	32706199		1	36634600	36634799		1	25643800	25643999		1	44008400	44009199
1	28718000	28718199		1	114025600	114025799		1	20032600	20033599		1	32734600	32734799		1	36650000	36650399		1	25681800	25682199		1	44015200	44015799
1	28735000	28735399		1	114141600	114141799		1	20036600	20036799		1	32749800	32750199		1	36706200	36706399		1	25695200	25696999		1	44034200	44034599
1	28756400	28756599		1	114534400	114535599		1	20085800	20085999		1	32753200	32753399		1	36713800	36714799		1	25728800	25729799		1	44079600	44080399
1	28776800	28776999		1	114637000	114637199		1	20109800	20110199		1	32807000	32807599		1	36746200	36746399		1	25795800	25796799		1	44185800	44186199
1	28780800	28781399		1	115513800	115514999		1	20136600	20137599		1	32826800	32827199		1	36757800	36758399		1	25814000	25816199		1	44503800	44504799
1	28789200	28789399		1	115536400	115537399		1	20223600	20223799		1	32833400	32834399		1	36764200	36764599		1	25823600	25824399		1	44558200	44558599
1	28875000	28875799		1	115785600	115785799		1	20243400	20244599		1	32863000	32863399		1	36789600	36790799		1	26012400	26013399		1	44573800	44574199
1	28922400	28922599		1	116319400	116320999		1	20261800	20261999		1	33107800	33108199		1	36791800	36791999		1	26023400	26023799		1	44883000	44883999
1	28925600	28925799		1	116573000	116574199		1	20285200	20285399		1	33137800	33140399		1	36797400	36797599		1	26037000	26038199		1	44995600	44996199
1	29037400	29037599		1	116871000	116871799		1	20292400	20293999		1	33371800	33371999		1	36798600	36798799		1	26061000	26061799		1	45015400	45015599
1	29050600	29050799		1	117023800	117023999		1	20297800	20298199		1	33417200	33417399		1	36803400	36803599		1	26107400	26107799		1	45038400	45039599
1	29095600	29095999		1	117036200	117036399		1	20304400	20304599		1	33434400	33434599		1	36905400	36905599		1	26123800	26124199		1	45057200	45057399
1	29126600	29126799		1	117766800	117767399		1	20307800	20308199		1	33445600	33445799		1	36960600	36960799		1	26214800	26214999		1	45089600	45089999
1	29186000	29186199		1	118570000	118570199		1	20400000	20400199		1	33496000	33496399		1	37046800	37047199		1	26217400	26218399		1	45245400	45246399
1	29408600	29409399		1	118812800	118813799		1	20412400	20413599		1	33547600	33547999		1	37101400	37101599		1	26222200	26223199		1	45283200	45283399
1	29443600	29443799		1	118861200	118863799		1	20458400	20458599		1	33788800	33789599		1	37191600	37191799		1	26231600	26232999		1	45308200	45308999
1	29502000	29502999		1	119077200	119077399		1	20598000	20599399		1	33921200	33921399		1	37204800	37205199		1	26255800	26256199		1	45363200	45363799
1	29666000	29666199		1	119433800	119434199		1	20634000	20634199		1	34306600	34306999		1	37219600	37220399		1	26356600	26357799		1	45539000	45539399
1	29996200	29996599		1	119847800	119848599		1	20689600	20689799		1	34320000	34320199		1	37227000	37227199		1	26423600	26424399		1	45557400	45557799
1	30006800	30007199		1	120651800	120652799		1	20691200	20691599		1	34344000	34344199		1	37252000	37252199		1	26460800	26462999		1	45591000	45591199
1	30016400	30016799		1	120755200	120757199		1	20712400	20712599		1	34594000	34594199		1	37270800	37271999		1	26630000	26630199		1	45705800	45705999
1	30155800	30156199		1	120768800	120770399		1	20746600	20746999		1	34763000	34764399		1	37391800	37391999		1	26761600	26761999		1	45750200	45750399
1	30187400	30187599		1	120802800	120803999		1	20789400	20789599		1	35100600	35100799		1	37398800	37398999		1	26772000	26772599		1	45844200	45844399
1	30206000	30206199		1	120909600	120910399		1	20812600	20812799		1	35122800	35122999		1	37436400	37436599		1	26777400	26777999		1	45887400	45887599
1	30246200	30246599		1	121145600	121146199		1	20820600	20820799		1	35205200	35205399		1	37477600	37477799		1	26785200	26785599		1	46055200	46055399
1	30313000	30313199		1	121695400	121696399		1	20902600	20902799		1	35287200	35287399		1	37480800	37481399		1	26796600	26796799		1	46165200	46165599
1	30330600	30331199		1	122193400	122193799		1	20945800	20946199		1	35305400	35305799		1	37485800	37485999		1	26798400	26799199		1	46345200	46345799
1	30367400	30367799		1	122238800	122240799		1	20986000	20986399		1	35331200	35331399		1	37489000	37489399		1	26844400	26844999		1	46382000	46382799
1	30414800	30414999		1	122298600	122298999		1	21013600	21013999		1	35400600	35400799		1	37523800	37524199		1	26856600	26856799		1	46413800	46414199
1	30605400	30605999		1	122450400	122451999		1	21018600	21019199		1	35474800	35474999		1	37529200	37529399		1	26887200	26887599		1	46737400	46737799
1	30656800	30657399		1	122670800	122671199		1	21103000	21103199		1	35542400	35542599		1	37534600	37535799		1	26890000	26890799		1	46743400	46743599
1	30678000	30678399		1	122692200	122692599		1	21158400	21158599		1	35651800	35651999		1	37582800	37583399		1	26910800	26911799		1	46874200	46874399
1	30679800	30679999		1	122749800	122749999		1	21215400	21215799		1	35917200	35917399		1	37585600	37585799		1	26953600	26954599		1	46911800	46912399
1	30700200	30701199		1	123288800	123289199		1	21290200	21290599		1	36169600	36169999		1	37616000	37616199		1	26980200	26981399		1	46917400	46917799
1	30729200	30729399		1	123620200	123622199		1	21366800	21366999		1	36246800	36246999		1	37622200	37622399		1	27015800	27016999		1	47353600	47353999
1	30772600	30772999		1	123684200	123684399		1	21388400	21388999		1	36328600	36328799		1	37627200	37627399		1	27042400	27042999		1	47486200	47487199
1	30787400	30787599		1	123733200	123733999		1	21414400	21414799		1	36421200	36421399		1	37656600	37656999		1	27054600	27055599		1	47613800	47614199
1	30821200	30821399		1	123916600	123916799		1	21464600	21464999		1	36717000	36718199		1	37661600	37661799		1	27117800	27118399		1	47623200	47623399
1	30867000	30867199		1	124275800	124276399		1	21536800	21536999		1	36777400	36777599		1	37676600	37676799		1	27129400	27130199		1	47729600	47730199
1	30881000	30881199		1	124548000	124549799		1	21553800	21553999		1	36974000	36974199		1	37702400	37702599		1	27289000	27289999		1	47777000	47777599
1	30883200	30883399		1	124691600	124691999		1	21565600	21565999		1	36983600	36983999		1	37823200	37823799		1	27309000	27310199		1	47825800	47826199
1	30921200	30921399		1	124740600	124742399		1	21671400	21671599		1	37200800	37201799		1	37833400	37834799		1	27322000	27322999		1	47857400	47858999
1	31011600	31011799		1	124797800	124798999		1	21696200	21696399		1	37291400	37291599		1	37920200	37920399		1	27370400	27370599		1	47947000	47947199
1	31172400	31173199		1	124814600	124815399		1	21725600	21727199		1	37438000	37438999		1	37977400	37977599		1	27394400	27394999		1	47956800	47957199
1	31240200	31240399		1	124889600	124889999		1	21802400	21802799		1	37636200	37636399		1	38032400	38032599		1	27421200	27421399		1	47983800	47984199
1	31269000	31269199		1	125178600	125179199		1	21810200	21810599		1	37739400	37740199		1	38074200	38074399		1	27438800	27439999		1	48287200	48287599
1	31508800	31508999		1	125603200	125603399		1	21812200	21812399		1	37846600	37846799		1	38137000	38137199		1	27452400	27453599		1	48846000	48846399
1	31536200	31536399		1	125702800	125702999		1	21813400	21813599		1	37905000	37905199		1	38212200	38212399		1	27489400	27489599		1	48877800	48879799
1	31556400	31556599		1	125840200	125840999		1	21868600	21868799		1	38243400	38244599		1	38228200	38228399		1	27502200	27503399		1	49098800	49098999
1	31651600	31651799		1	126223200	126223999		1	21877000	21877199		1	38262000	38262199		1	38266400	38267599		1	27582000	27582799		1	49139600	49139999
1	31761800	31761999		1	126228000	126228199		1	21884800	21884999		1	38511800	38511999		1	38338600	38339199		1	27584600	27584799		1	49165000	49165399
1	31770000	31770199		1	126547400	126547799		1	21928200	21928399		1	38531600	38532399		1	38346800	38346999		1	27605000	27605199		1	49206200	49207399
1	31774200	31775399		1	126636800	126637799		1	21954400	21954799		1	38831200	38831399		1	38404800	38404999		1	27682800	27684199		1	49214600	49214799
1	31887800	31887999		1	128015200	128015399		1	21988400	21988599		1	39721600	39721999		1	38450800	38450999		1	27692200	27692799		1	49361000	49361399
1	31938800	31938999		1	128118400	128120399		1	21990200	21990399		1	39893800	39893999		1	38546600	38547199		1	27701600	27702399		1	49441800	49442199
1	31945600	31945799		1	128138600	128138799		1	22127400	22127599		1	40097000	40097999		1	38564600	38564799		1	27767200	27768399		1	49528000	49528999
1	32043400	32044399		1	128281800	128282199		1	22172400	22173599		1	40108600	40108799		1	38577200	38577399		1	27805800	27806399		1	49706400	49706799
1	32055200	32055399		1	129141600	129142999		1	22186400	22186999		1	40116000	40116199		1	38614200	38614399		1	27815000	27815599		1	49742800	49744199
1	32063400	32063599		1	129270200	129270999		1	22203600	22204999		1	40117000	40117599		1	38648600	38648799		1	27867600	27867799		1	49765000	49765399
1	32083000	32083199		1	129469400	129471399		1	22272800	22272999		1	40162800	40162999		1	38737200	38738599		1	27953200	27953799		1	49771800	49771999
1	32110800	32110999		1	129504200	129504999		1	22280600	22280799		1	40172600	40172799		1	38782800	38782999		1	28065800	28066199		1	49777400	49777799
1	32130800	32131599		1	129830800	129831399		1	22326200	22326999		1	40205200	40205399		1	38803000	38803999		1	28067800	28068399		1	49828000	49828399
1	32155200	32156199		1	130632200	130633199		1	22329800	22329999		1	40292600	40292799		1	38868600	38868999		1	28122800	28126399		1	49885200	49886199
1	32164800	32164999		1	130954000	130954199		1	22371800	22372399		1	40339800	40339999		1	38890800	38891199		1	28136400	28138599		1	49970200	49971199
1	32168400	32168599		1	131450000	131452399		1	22497000	22497599		1	40642600	40642999		1	38899000	38899599		1	28164400	28165399		1	49987000	49988199
1	32199400	32199599		1	131916000	131917799		1	22506000	22506599		1	40692000	40692199		1	38928800	38929199		1	28169800	28170999		1	50066400	50066999
1	32235200	32235399		1	132048400	132049799		1	22507400	22508799		1	40790000	40790199		1	38956600	38956799		1	28181600	28182199		1	50158800	50159199
1	32256400	32256599		1	132175600	132175999		1	22541400	22541599		1	40981800	40981999		1	39043000	39043199		1	28273000	28274199		1	50283800	50284199
1	32287400	32287799		1	132406800	132407599		1	22548800	22548999		1	40997400	40997599		1	39046800	39046999		1	28298000	28298399		1	50299000	50299399
1	32293600	32293999		1	132908800	132908999		1	22571800	22572199		1	41124000	41125599		1	39094200	39094399		1	28369800	28370199		1	50363600	50364599
1	32360600	32360799		1	133594400	133595999		1	22583000	22585599		1	41132400	41132599		1	39125200	39125399		1	28391600	28391799		1	50385000	50385199
1	32377800	32377999		1	134159200	134159599		1	22658200	22658399		1	41220000	41220199		1	39192200	39193599		1	28447400	28448599		1	50485400	50486799
1	32445800	32445999		1	134532400	134532799		1	22664200	22664399		1	41227200	41227599		1	39282400	39282599		1	28470600	28471199		1	50652800	50653599
1	32467400	32467599		1	134932600	134932799		1	22675400	22676399		1	41254400	41255399		1	39339600	39339999		1	28489400	28489799		1	50849800	50849999
1	32509400	32509599		1	135132200	135132599		1	22702000	22702599		1	41378400	41378599		1	39357600	39357799		1	28492400	28493399		1	50863800	50863999
1	32541800	32541999		1	135279600	135279799		1	22710600	22711599		1	41407600	41407799		1	39373000	39373199		1	28510800	28514399		1	50909800	50910199
1	32576200	32576399		1	135333800	135334199		1	22746400	22747399		1	41484600	41484799		1	39374200	39374999		1	28522800	28523399		1	50933600	50933799
1	32724000	32724199		1	135345200	135345999		1	22754000	22754999		1	41537800	41537999		1	39389400	39389799		1	28550000	28551799		1	50956600	50956799
1	32862400	32862599		1	135360000	135360399		1	22808000	22808199		1	41602000	41602199		1	39390600	39390799		1	28577600	28578599		1	51048400	51050199
1	32888600	32888799		1	135610800	135611199		1	22856800	22857599		1	41622000	41622199		1	39421000	39421399		1	28585200	28585599		1	51118600	51118999
1	32921600	32921799		1	135763400	135763799		1	22881200	22882199		1	41718800	41719199		1	39464200	39464399		1	28606400	28608399		1	51243200	51243599
1	32989600	32989799		1	136674800	136675199		1	22910600	22910999		1	41728800	41728999		1	39478200	39478399		1	28681400	28682199		1	51264800	51265199
1	33081400	33081799		1	137023200	137024799		1	22946000	22946399		1	41753800	41754999		1	39529400	39529599		1	28701200	28701999		1	51408200	51408399
1	33084800	33084999		1	137254600	137256399		1	22977000	22978199		1	41846400	41846599		1	39535600	39535799		1	28779600	28779999		1	51424200	51424399
1	33140600	33140799		1	137488200	137488999		1	22988200	22988599		1	41851400	41851999		1	39747200	39747599		1	28832600	28833799		1	51511800	51511999
1	33149800	33149999		1	137795600	137796799		1	22992600	22992799		1	41873000	41873199		1	39804400	39804599		1	28905800	28906799		1	51591200	51592599
1	33194800	33194999		1	137954800	137955199		1	23004800	23005199		1	41913200	41913399		1	39819200	39819599		1	28916600	28916799		1	51614000	51614799
1	33277600	33277799		1	138008400	138011599		1	23027600	23029599		1	41986000	41986399		1	39826400	39826599		1	28965200	28966799		1	51621200	51622599
1	33282000	33282199		1	138157800	138157999		1	23038600	23038799		1	42013800	42013999		1	39833400	39834999		1	28994800	28995399		1	51813000	51813599
1	33284000	33284199		1	138232600	138235199		1	23051000	23051399		1	42032000	42032999		1	39836000	39836199		1	29027400	29027999		1	51924400	51924799
1	33299400	33299599		1	138337600	138338799		1	23054600	23054999		1	42037200	42037599		1	39845000	39845399		1	29043000	29043599		1	52007200	52007599
1	33350600	33350799		1	138695800	138697399		1	23112600	23113799		1	42089400	42089599		1	39875400	39875599		1	29134000	29135799		1	52018800	52019399
1	33430600	33430799		1	139064000	139065199		1	23173200	23174999		1	42105400	42105599		1	39917800	39917999		1	29155400	29155999		1	52083200	52083399
1	33532200	33532599		1	139093600	139093799		1	23268800	23269799		1	42111000	42111199		1	39918800	39919199		1	29165400	29165599		1	52089200	52089999
1	33577400	33577599		1	139110600	139111999		1	23272800	23272999		1	42188200	42188599		1	39937000	39937199		1	29202000	29202599		1	52112200	52112799
1	33578400	33578599		1	139174000	139175799		1	23290000	23290999		1	42250000	42250599		1	39954800	39954999		1	29273400	29273999		1	52144200	52144599
1	33689800	33690199		1	139331600	139331799		1	23316600	23316799		1	42303400	42303599		1	39984600	39985799		1	29302800	29302999		1	52155200	52155599
1	33718400	33718599		1	139371000	139371599		1	23340400	23341399		1	42321800	42322199		1	40008000	40008199		1	29360000	29360199		1	52209600	52210599
1	33904000	33904199		1	139508600	139509599		1	23429000	23429199		1	42345000	42345199		1	40043400	40043799		1	29514400	29515599		1	52239000	52239399
1	33948400	33949399		1	140294800	140297199		1	23439800	23439999		1	42372000	42372799		1	40066800	40067599		1	29548000	29549199		1	52246200	52246799
1	34051800	34052199		1	140375400	140376599		1	23451200	23451399		1	42421400	42421599		1	40070400	40070799		1	29635000	29635599		1	52273000	52274599
1	34171000	34171399		1	140420000	140420399		1	23473800	23476799		1	42555600	42556799		1	40098800	40099199		1	29709800	29710799		1	52373200	52373399
1	34193000	34193199		1	140455800	140456799		1	23493600	23493999		1	42568600	42569399		1	40116600	40117199		1	29793400	29793999		1	52391600	52391799
1	34239200	34239799		1	140550600	140551399		1	23512800	23512999		1	42714400	42714599		1	40132200	40132599		1	29813800	29814999		1	52411200	52411599
1	34267000	34267199		1	140760800	140761199		1	23525000	23526999		1	42874000	42874199		1	40151200	40151399		1	29844400	29845999		1	52615000	52616799
1	34310600	34310799		1	140932600	140932999		1	23578200	23578399		1	42891400	42892199		1	40174200	40174399		1	29884000	29884399		1	52658000	52658999
1	34381800	34381999		1	141091600	141091799		1	23638400	23638799		1	42910200	42911399		1	40205200	40205399		1	29963600	29966799		1	52687000	52687399
1	34433200	34433399		1	141249800	141250199		1	23687800	23687999		1	42929200	42929399		1	40232000	40232199		1	29973600	29973799		1	52975000	52975599
1	34485400	34485799		1	141445800	141447599		1	23771600	23771799		1	42964800	42965799		1	40234600	40234999		1	29977000	29978199		1	52987800	52989199
1	34588800	34588999		1	142026200	142027799		1	23797600	23799199		1	43062400	43063399		1	40284200	40284599		1	29984000	29984799		1	53138000	53138199
1	34641200	34641399		1	142294000	142294199		1	23874800	23875199		1	43079000	43079399		1	40290400	40290999		1	30010000	30010199		1	53154000	53154399
1	34644000	34644199		1	142343000	142344599		1	23913800	23913999		1	43272000	43272199		1	40314000	40314199		1	30026400	30026999		1	53215200	53215799
1	34752400	34752799		1	142479000	142479999		1	23915200	23915399		1	43370600	43371799		1	40359600	40359799		1	30094800	30096599		1	53281800	53282199
1	34773800	34773999		1	142519600	142519799		1	23940600	23940999		1	43396000	43396199		1	40401400	40401799		1	30109000	30110999		1	53567200	53568399
1	35018000	35018199		1	142553800	142555199		1	23945600	23946599		1	43419200	43419999		1	40428400	40428599		1	30135800	30136199		1	53975800	53976199
1	35143200	35143399		1	143613800	143614599		1	23950600	23950999		1	43449800	43450799		1	40686200	40686599		1	30150800	30152799		1	54033600	54033999
1	35170600	35170799		1	143799000	143799199		1	23961800	23962399		1	43661200	43661399		1	40729600	40729799		1	30156000	30157999		1	54052000	54052399
1	35188600	35188799		1	143815400	143815799		1	23980200	23980599		1	43712600	43712799		1	40745200	40745599		1	30326600	30327799		1	54066400	54067399
1	35236400	35236599		1	143817200	143818199		1	24027000	24027399		1	43722800	43722999		1	40757000	40757199		1	30352400	30353199		1	54751800	54752199
1	35252400	35252599		1	143852400	143852799		1	24113800	24113999		1	43800000	43801799		1	40801200	40801599		1	30363000	30363799		1	54815600	54816399
1	35283400	35283599		1	144039600	144039799		1	24134800	24134999		1	43837800	43837999		1	40836000	40836399		1	30422400	30422799		1	54827200	54828599
1	35284400	35284599		1	144280400	144280599		1	24160400	24160599		1	43970600	43972799		1	40855600	40855799		1	30451800	30452199		1	54874000	54874599
1	35331000	35331199		1	144482200	144483399		1	24233400	24234199		1	44014600	44014999		1	40860600	40860799		1	30548400	30548799		1	54879000	54880199
1	35351400	35351599		1	144551600	144552599		1	24261400	24261599		1	44162400	44162799		1	40919800	40920399		1	30565000	30565399		1	55021400	55021799
1	35355600	35355799		1	144566000	144567399		1	24293800	24293999		1	44185000	44185199		1	41015000	41015199		1	30568000	30568799		1	55030800	55031399
1	35401400	35401599		1	144649200	144650399		1	24310000	24310399		1	44189200	44189399		1	41050000	41050199		1	30625600	30625799		1	55032800	55033799
1	35420000	35420399		1	144684200	144686999		1	24387000	24388199		1	44190600	44191999		1	41116200	41116399		1	30670200	30670599		1	55087000	55087399
1	35459800	35460199		1	144925200	144925999		1	24390800	24391199		1	44199000	44199799		1	41132000	41132799		1	30717600	30718999		1	55109800	55110399
1	35542200	35542799		1	144991000	144991999		1	24423200	24423399		1	44233200	44234199		1	41194200	41194399		1	30768400	30768799		1	55122000	55123399
1	35715400	35715599		1	145003800	145005599		1	24446200	24446599		1	44392200	44392399		1	41285400	41285999		1	30772000	30772599		1	55161000	55161599
1	35729000	35729199		1	145145600	145145799		1	24548000	24548199		1	44488400	44488599		1	41291200	41291399		1	30845200	30845399		1	55294800	55295599
1	35730400	35730799		1	145194000	145194199		1	24612800	24613599		1	44521600	44521999		1	41343200	41343399		1	30904800	30905999		1	55407000	55407599
1	35843400	35843599		1	145432000	145432999		1	24634400	24634799		1	44636800	44637199		1	41485200	41485399		1	30915600	30916799		1	55416000	55416599
1	35957000	35957399		1	145596400	145596599		1	24637400	24637799		1	44711800	44712199		1	41570000	41570199		1	30978800	30979999		1	55469000	55469399
1	36016600	36016799		1	145871400	145871599		1	24672800	24672999		1	44752600	44753399		1	41607000	41607399		1	31000400	31000799		1	55484000	55484399
1	36048800	36049199		1	146158200	146158999		1	24717600	24717799		1	44944000	44945599		1	41684400	41684799		1	31063200	31063999		1	55624600	55625399
1	36118000	36118199		1	146301800	146302799		1	24745600	24745799		1	44955200	44955399		1	41750400	41750599		1	31185000	31185999		1	55724400	55724599
1	36132200	36132399		1	146451800	146451999		1	24825400	24826199		1	45021000	45021399		1	41820800	41822199		1	31240800	31241999		1	55759800	55760199
1	36154000	36154199		1	146527800	146530199		1	24832200	24832399		1	45024600	45025399		1	41905600	41905799		1	31324400	31324799		1	55833400	55834799
1	36173600	36173999		1	146666600	146668199		1	24837600	24837999		1	45079000	45079199		1	42136200	42136799		1	31327800	31328399		1	55884600	55886199
1	36329400	36329599		1	146703600	146704199		1	24912800	24912999		1	45103000	45103199		1	42233400	42233599		1	31360200	31360999		1	55895400	55895799
1	36473800	36473999		1	146802200	146802999		1	24961600	24961799		1	45117400	45118599		1	42243200	42243399		1	31373200	31373399		1	55985800	55986199
1	36477000	36477199		1	146803800	146804199		1	25003200	25003799		1	45148200	45148399		1	42359000	42359199		1	31576600	31578399		1	56008200	56008599
1	36483800	36483999		1	146854000	146854199		1	25008600	25009599		1	45149200	45150999		1	42450400	42450599		1	31643600	31643799		1	56082800	56083399
1	36491400	36491599		1	147177800	147178999		1	25056600	25056799		1	45280800	45281399		1	42452800	42453399		1	31664800	31664999		1	56271000	56271799
1	36501000	36501199		1	147677600	147677799		1	25073200	25073599		1	45297400	45297799		1	42525400	42525599		1	31676600	31676799		1	56363200	56363599
1	36522000	36522999		1	147886000	147887399		1	25101000	25101199		1	45308000	45308999		1	42648800	42649199		1	31683200	31683999		1	56498600	56499199
1	36565600	36565799		1	148191600	148191999		1	25176200	25176399		1	45317800	45317999		1	42652000	42652199		1	31776000	31776799		1	56503800	56504399
1	36596600	36596999		1	148242600	148242999		1	25198600	25198999		1	45377800	45377999		1	42714400	42714599		1	31847600	31847999		1	56579600	56580599
1	36611400	36611599		1	148258200	148258599		1	25260600	25260999		1	45413600	45413799		1	42880400	42880599		1	31867000	31867599		1	56653200	56653799
1	36622600	36622999		1	148286800	148288599		1	25279800	25280199		1	45441400	45441599		1	42953200	42953399		1	31879200	31880199		1	56680600	56680799
1	36654800	36654999		1	148713400	148714799		1	25376200	25376399		1	45491200	45492399		1	42960200	42960399		1	31901400	31902199		1	56727600	56728799
1	36673200	36673599		1	148796400	148796999		1	25436600	25436999		1	45495600	45496199		1	43022800	43022999		1	31933800	31934199		1	56756600	56756999
1	36773600	36773799		1	148957800	148958999		1	25550800	25551199		1	45534400	45534799		1	43079600	43079799		1	31978000	31978399		1	56794200	56794399
1	36806200	36806399		1	149001400	149002599		1	25609200	25609599		1	45640600	45640799		1	43183000	43183199		1	31990200	31990799		1	56916600	56916999
1	36835200	36835399		1	149147000	149148399		1	25617200	25618199		1	45751600	45751999		1	43211000	43211399		1	32012800	32012999		1	56957200	56957599
1	36890800	36890999		1	149242400	149242599		1	25621400	25621799		1	45759400	45759799		1	43242200	43242399		1	32125600	32126599		1	57034600	57034999
1	37059600	37059799		1	149555000	149555599		1	25654400	25655199		1	45847800	45847999		1	43261000	43261799		1	32193400	32195399		1	57160000	57160599
1	37089400	37089599		1	149640600	149640999		1	25694600	25694999		1	45859400	45859599		1	43397400	43397999		1	32217000	32218399		1	57303000	57303999
1	37198200	37198399		1	150019200	150019599		1	25702000	25702399		1	45872200	45872399		1	43400000	43400199		1	32287800	32288199		1	57475000	57475599
1	37250000	37250199		1	150059600	150060199		1	25724400	25724599		1	45910200	45910599		1	43461600	43462399		1	32301800	32302999		1	57574000	57575399
1	37292000	37292399		1	150434600	150436199		1	25756800	25756999		1	45979600	45979799		1	43533400	43533599		1	32355600	32356399		1	57581400	57581799
1	37300400	37300599		1	150452200	150452399		1	25767200	25767999		1	45996800	45996999		1	43546200	43547599		1	32399200	32400199		1	57640200	57640599
1	37304800	37305199		1	150562200	150563199		1	25770000	25770199		1	46020200	46020399		1	43622400	43622599		1	32414200	32415599		1	57725400	57725599
1	37374200	37374399		1	150808600	150809399		1	25812400	25813599		1	46045000	46045199		1	43726600	43726999		1	32509800	32510399		1	57855000	57855399
1	37418200	37418399		1	150820600	150822399		1	25817600	25818399		1	46211800	46211999		1	43752800	43752999		1	32513800	32514799		1	57923400	57923599
1	37482000	37482199		1	151046400	151047199		1	25857400	25857599		1	46306400	46307399		1	43770000	43770399		1	32528200	32528999		1	57996400	57996799
1	37566600	37567199		1	151055000	151057799		1	25876600	25876999		1	46530000	46530199		1	43827600	43827799		1	32534600	32535999		1	58063400	58064599
1	37583600	37583799		1	151114400	151114599		1	25884000	25884399		1	46573400	46573599		1	43831800	43832399		1	32539200	32540599		1	58122200	58122399
1	37614800	37614999		1	151185800	151185999		1	25890400	25890799		1	46627400	46628199		1	43855000	43855399		1	32600000	32600399		1	58137000	58137199
1	37619800	37619999		1	151376400	151376799		1	25903800	25903999		1	46640800	46641799		1	43873400	43873799		1	32641200	32642399		1	58177200	58177599
1	37639200	37639399		1	151674000	151674199		1	25994800	25995199		1	46728400	46729399		1	43928400	43928599		1	32744400	32745999		1	58194000	58194799
1	37642200	37642399		1	151754200	151754399		1	26090000	26090199		1	46845600	46845799		1	43935600	43935799		1	32802200	32802799		1	58232400	58232999
1	37644800	37644999		1	152104800	152106199		1	26091200	26091599		1	47074000	47074399		1	43956800	43957399		1	32856200	32857199		1	58316600	58316999
1	37852400	37852599		1	152276000	152276199		1	26097800	26097999		1	47118200	47119199		1	44039600	44039999		1	32859400	32860599		1	58444400	58444799
1	37888600	37888799		1	153055200	153055399		1	26107400	26107599		1	47142400	47143399		1	44082400	44082599		1	32909400	32909799		1	58485200	58485399
1	37943200	37943399		1	153203600	153204599		1	26137800	26138399		1	47165000	47165399		1	44102200	44102399		1	32961200	32961399		1	58673600	58673799
1	37951800	37951999		1	153580800	153581599		1	26161400	26161799		1	47217600	47218199		1	44151000	44152399		1	33004200	33005999		1	58678800	58680199
1	37965000	37965199		1	153679600	153679799		1	26194400	26195399		1	47221800	47221999		1	44302600	44302999		1	33193600	33193999		1	58712800	58714799
1	38044800	38044999		1	153713200	153713599		1	26221800	26222999		1	47287800	47287999		1	44328600	44328999		1	33195200	33195399		1	58746800	58747199
1	38137200	38137399		1	153747800	153748399		1	26243000	26243599		1	47306200	47306599		1	44343400	44344199		1	33196600	33197599		1	58788400	58788799
1	38162600	38162799		1	154058600	154059599		1	26274800	26275199		1	47322000	47322999		1	44363400	44364799		1	33434800	33434999		1	58968800	58969199
1	38165600	38165799		1	154082200	154083199		1	26279200	26281999		1	47359400	47359799		1	44413400	44413599		1	33444600	33445199		1	59047400	59047799
1	38246000	38246199		1	154233000	154234599		1	26294400	26294999		1	47382400	47382999		1	44531600	44531999		1	33516200	33516399		1	59144800	59145199
1	38366800	38366999		1	154317000	154317399		1	26304800	26305799		1	47402600	47403599		1	44550800	44550999		1	33550600	33551399		1	59165800	59165999
1	38596800	38597199		1	154696000	154696999		1	26310000	26310199		1	47408600	47408799		1	44552200	44552399		1	33588200	33588399		1	59190400	59190599
1	38725200	38725399		1	154734200	154734399		1	26318000	26318399		1	47518800	47518999		1	44624400	44624999		1	33634000	33634199		1	59217600	59217799
1	38901200	38901399		1	155541400	155541599		1	26355200	26355399		1	47665800	47666799		1	44707000	44707199		1	33640200	33640599		1	59280000	59281599
1	38905400	38905599		1	155715400	155717799		1	26387800	26388199		1	47743600	47743799		1	44764600	44764999		1	33668600	33670399		1	59329800	59330199
1	38912800	38912999		1	156282400	156283599		1	26389400	26389599		1	47807600	47807799		1	44807200	44807399		1	33676600	33676799		1	59340400	59340799
1	38948600	38948799		1	156428400	156428599		1	26397000	26397399		1	47938600	47940399		1	44855800	44856199		1	33770600	33771599		1	59375000	59375999
1	38965000	38965199		1	156882800	156883199		1	26406400	26406599		1	47942200	47942599		1	44915800	44915999		1	33790200	33790999		1	59423400	59423999
1	39011200	39011799		1	157296400	157296999		1	26477400	26478599		1	48012200	48014599		1	44938400	44938599		1	33836000	33836999		1	59443400	59443999
1	39026800	39026999		1	158045200	158045999		1	26508000	26509199		1	48018800	48019399		1	45004400	45004799		1	33853000	33853199		1	59467400	59467799
1	39039600	39039799		1	158338600	158340199		1	26524200	26524399		1	48073600	48076199		1	45131800	45132199		1	33854000	33854799		1	59568000	59568599
1	39171000	39171199		1	158354000	158354599		1	26568000	26568399		1	48210000	48210399		1	45147800	45147999		1	33885000	33885399		1	59621800	59622399
1	39182400	39182599		1	158437600	158437999		1	26570400	26572199		1	48235800	48236999		1	45217000	45217399		1	33987600	33988599		1	59809600	59809999
1	39184200	39184399		1	158755400	158756799		1	26579600	26579999		1	48258000	48258999		1	45230400	45231399		1	34000000	34000399		1	59827800	59828199
1	39200000	39200199		1	158792400	158792599		1	26592600	26592799		1	48443600	48443799		1	45346000	45346399		1	34066000	34066799		1	59839600	59839999
1	39202800	39202999		1	158996000	158996799		1	26601800	26603199		1	48483400	48483599		1	45392200	45392599		1	34086000	34087799		1	59850200	59850999
1	39342200	39342399		1	159149600	159149799		1	26647600	26647799		1	48503800	48503999		1	45477600	45479799		1	34169000	34169399		1	59896000	59896799
1	39357200	39357399		1	159405600	159407199		1	26700000	26700199		1	48557000	48557799		1	45499200	45499399		1	34183600	34184199		1	59899600	59899999
1	39427400	39427599		1	160330800	160332399		1	26702000	26702599		1	48560800	48560999		1	45500800	45501199		1	34227600	34228399		1	60184400	60185599
1	39450200	39450399		1	160412200	160412799		1	26704200	26704399		1	48562600	48563199		1	45669600	45670799		1	34318200	34319599		1	60352800	60352999
1	39576400	39577199		1	160726800	160728399		1	26723400	26723999		1	48600600	48600999		1	45683400	45683599		1	34374400	34374599		1	60360800	60360999
1	39597200	39597599		1	160944600	160947399		1	26762600	26762799		1	48606200	48606399		1	45686400	45686599		1	34392400	34393199		1	60585000	60585599
1	39609800	39609999		1	161028400	161029999		1	26785400	26785999		1	48675800	48677599		1	45856800	45856999		1	34406400	34406599		1	60589600	60589799
1	39684000	39684399		1	161370000	161370199		1	26793600	26793999		1	48725000	48725799		1	45863600	45863999		1	34489800	34490999		1	60635000	60635199
1	39696400	39696599		1	161475800	161476599		1	26829000	26829399		1	48744200	48744599		1	45875400	45876599		1	34498800	34498999		1	60789400	60790199
1	39714600	39714799		1	161757200	161758399		1	26864000	26864399		1	48790000	48790199		1	45892400	45892999		1	34527200	34528599		1	60860800	60861199
1	39719400	39719599		1	161866200	161867199		1	26911400	26912399		1	48800000	48800199		1	45935600	45935999		1	34595400	34595599		1	61223200	61223599
1	39744000	39744399		1	161943400	161944199		1	26986400	26986599		1	48857800	48857999		1	46025400	46026799		1	34597800	34597999		1	61297200	61297599
1	39760600	39760999		1	161953200	161953599		1	27014000	27014599		1	48865200	48865399		1	46070400	46070799		1	34678200	34678599		1	61299600	61300799
1	39775000	39776599		1	162370800	162371599		1	27047800	27048199		1	48892400	48892999		1	46320600	46320799		1	34815800	34816599		1	61392000	61394599
1	39927200	39927399		1	162921800	162922999		1	27057200	27058799		1	48929400	48929799		1	46370400	46370799		1	34825600	34826199		1	62369800	62370799
1	39997600	39997799		1	163114600	163114799		1	27078200	27079399		1	48941600	48943599		1	46374400	46374799		1	34840400	34842599		1	62408200	62409599
1	40066000	40066199		1	163151200	163151599		1	27092200	27092399		1	49009200	49009399		1	46457600	46457799		1	34875000	34875599		1	62518000	62518399
1	40121800	40121999		1	163228400	163229599		1	27156800	27157199		1	49028000	49028399		1	46477000	46477399		1	34908000	34908199		1	62544400	62544799
1	40275000	40275199		1	163235400	163235799		1	27244200	27244599		1	49041600	49041799		1	46619200	46619599		1	35130600	35131599		1	62588000	62588199
1	40293600	40293799		1	163351000	163351199		1	27248400	27248599		1	49153800	49154199		1	46772000	46772399		1	35134600	35134799		1	62618000	62618399
1	40323000	40323199		1	163654600	163655199		1	27303600	27304399		1	49155600	49155799		1	46779200	46779599		1	35173200	35174599		1	62903800	62904999
1	40329200	40329399		1	163757000	163758999		1	27323600	27323999		1	49165400	49167599		1	46821400	46822399		1	35241000	35242199		1	62923400	62923999
1	40446600	40446799		1	163770000	163771199		1	27360600	27361799		1	49301000	49301199		1	46896600	46896999		1	35305000	35306199		1	62955800	62957199
1	40516600	40516999		1	164241000	164241599		1	27377400	27378999		1	49307600	49307999		1	46930800	46931399		1	35504400	35504799		1	63068600	63068999
1	40559400	40559599		1	164984800	164986199		1	27408000	27408799		1	49428600	49431599		1	46942800	46942999		1	35508400	35508799		1	63124600	63124999
1	40582200	40582399		1	165024600	165025199		1	27424000	27424599		1	49446600	49446799		1	46986800	46987199		1	35572000	35572199		1	63476200	63476399
1	40591200	40591399		1	165488000	165488199		1	27428200	27428399		1	49447600	49449599		1	47026800	47026999		1	35607200	35607399		1	63742600	63742999
1	40621000	40621199		1	165612200	165612399		1	27430400	27430799		1	49451000	49451199		1	47075400	47075999		1	35758800	35759199		1	63760200	63760399
1	40650400	40651199		1	165664600	165664799		1	27436600	27436799		1	49454200	49454999		1	47096800	47096999		1	35782800	35783799		1	63769400	63772599
1	40743000	40743199		1	165896800	165897399		1	27458600	27459999		1	49468600	49468799		1	47207600	47207799		1	35795000	35795799		1	64107000	64107199
1	40758400	40758599		1	165915000	165915199		1	27533400	27533599		1	49482400	49482599		1	47212800	47213399		1	35838400	35838999		1	64113000	64113399
1	40763400	40763799		1	166119600	166120599		1	27565600	27565799		1	49548200	49548999		1	47300000	47300399		1	35894000	35894799		1	64196000	64196199
1	40776600	40776799		1	166245200	166245999		1	27590600	27591399		1	49561400	49563199		1	47409800	47409999		1	35956200	35956599		1	64237000	64237199
1	40791400	40791599		1	166321400	166322999		1	27603800	27603999		1	49567800	49567999		1	47441600	47442199		1	36041000	36042199		1	64295400	64295599
1	40794800	40794999		1	166827400	166827799		1	27606600	27607399		1	49575200	49576599		1	47526600	47526799		1	36056200	36057399		1	64395000	64395999
1	40846600	40846999		1	166843400	166843599		1	27671800	27672399		1	49677400	49677799		1	47547600	47548199		1	36058200	36058599		1	64431600	64431999
1	40852000	40852199		1	167083400	167085799		1	27689800	27690199		1	49782800	49783599		1	47598400	47598599		1	36089400	36089799		1	64603400	64603799
1	40873400	40873799		1	167188200	167188999		1	27706400	27706599		1	49792200	49793999		1	48001400	48001599		1	36124400	36124599		1	64662600	64663199
1	40878800	40878999		1	167310800	167311199		1	27744400	27744599		1	49891200	49891399		1	48081800	48081999		1	36188200	36189599		1	64693200	64693599
1	40924800	40924999		1	167570000	167571199		1	27764200	27765199		1	49893200	49893399		1	48278600	48279199		1	36227400	36228399		1	64740400	64740999
1	40943400	40943599		1	167769600	167770599		1	27835000	27835199		1	49980400	49980799		1	48319400	48319799		1	36247800	36248399		1	64776600	64776999
1	41010200	41010399		1	168545800	168545999		1	27839800	27839999		1	49996400	49997399		1	48329600	48329799		1	36249200	36249399		1	64817400	64817799
1	41055200	41055599		1	168997000	168997799		1	27886200	27888399		1	50042200	50043399		1	48435400	48436199		1	36262600	36262999		1	64840600	64841199
1	41062800	41062999		1	169046600	169048199		1	27895800	27896199		1	50059000	50059199		1	48480200	48480599		1	36322000	36323199		1	64894200	64895199
1	41096200	41096399		1	169120400	169121199		1	27949000	27949799		1	50088800	50088999		1	48492400	48495199		1	36356400	36357199		1	64947000	64947599
1	41190000	41190799		1	169122200	169122399		1	27967000	27967599		1	50121400	50121599		1	48597600	48598199		1	36363000	36364199		1	64974600	64974999
1	41283800	41283999		1	169166000	169166199		1	27970000	27970199		1	50254400	50255599		1	48666800	48666999		1	36370400	36370799		1	65037800	65037999
1	41448200	41448399		1	169209200	169209599		1	27985600	27986399		1	50344600	50344799		1	48901800	48903199		1	36691000	36691399		1	65113600	65113799
1	41490000	41490199		1	169294200	169295399		1	28034600	28034799		1	50397800	50397999		1	48979800	48979999		1	36695400	36696999		1	65134200	65134599
1	41662000	41662999		1	169318600	169318999		1	28048800	28048999		1	50462200	50463599		1	49001400	49001599		1	36733000	36734799		1	65175000	65175399
1	41709000	41709199		1	169698400	169700199		1	28070400	28071199		1	50483600	50484599		1	49098000	49098199		1	36816200	36816399		1	65195000	65195399
1	41825800	41825999		1	169737000	169738399		1	28181600	28182199		1	50532000	50532599		1	49134000	49134399		1	36842400	36843199		1	65266600	65266999
1	41843200	41843399		1	169970600	169970999		1	28186200	28186399		1	50551200	50552799		1	49223000	49223399		1	36844400	36846799		1	65302600	65302999
1	41949400	41949799		1	169986000	169986199		1	28214600	28214999		1	50570000	50570399		1	49245200	49245799		1	36851600	36852599		1	65321600	65322399
1	42006800	42006999		1	170311800	170313199		1	28216600	28216799		1	50587600	50587799		1	49483800	49484199		1	36854400	36854599		1	65673000	65673399
1	42097600	42097999		1	170497000	170497599		1	28227200	28228399		1	50614800	50616999		1	49510400	49510599		1	36873400	36873999		1	65824400	65824599
1	42119000	42119199		1	170788600	170788999		1	28314800	28315999		1	50664600	50664799		1	49833600	49833999		1	36884800	36885799		1	65999400	65999999
1	42146400	42146599		1	171152400	171152599		1	28353000	28354599		1	50684200	50684999		1	50044400	50044599		1	36966600	36966999		1	66148400	66148799
1	42149000	42149199		1	171495000	171495999		1	28371600	28371799		1	50686200	50686599		1	50094400	50094599		1	36996600	36996799		1	66292200	66293199
1	42176400	42176599		1	171522400	171522999		1	28426600	28426999		1	50800000	50800199		1	50183000	50183199		1	37209200	37209599		1	66317400	66317999
1	42178800	42178999		1	171584600	171585799		1	28473400	28473599		1	50847200	50847399		1	50234200	50234399		1	37240600	37240799		1	66388800	66388999
1	42185600	42185799		1	171702600	171702799		1	28479200	28480799		1	50937600	50938799		1	50244400	50244799		1	37323600	37324999		1	66730000	66730199
1	42199600	42199799		1	172183000	172183399		1	28561200	28561599		1	50985600	50985799		1	50266600	50266999		1	37530800	37531199		1	66937400	66938599
1	42226200	42226399		1	172220400	172221199		1	28605600	28605799		1	51024400	51024599		1	50329800	50330199		1	37635600	37636399		1	66976800	66977799
1	42291000	42291199		1	172504000	172504199		1	28644400	28645599		1	51043400	51043599		1	50485400	50485799		1	37669800	37670199		1	67009800	67010199
1	42476600	42477199		1	173298600	173300199		1	28675600	28676599		1	51046800	51046999		1	50490800	50491999		1	37683600	37685199		1	67031200	67033799
1	42484000	42484199		1	173483600	173483999		1	28687000	28687199		1	51064400	51064599		1	50599000	50599199		1	37688800	37689999		1	67049800	67050199
1	42503000	42503199		1	173561800	173562399		1	28717400	28718399		1	51065400	51065799		1	50647800	50648199		1	37839600	37839999		1	67326800	67326999
1	42519200	42519399		1	173710800	173711599		1	28737800	28738799		1	51460200	51460399		1	50688000	50689199		1	37847200	37848999		1	67412400	67412799
1	42631000	42631199		1	173999600	174000399		1	28746600	28747599		1	51468800	51469199		1	50717800	50718199		1	37863400	37864399		1	67455200	67455599
1	42687800	42687999		1	174069000	174071199		1	28803000	28803399		1	51543600	51543999		1	50774200	50774399		1	37876000	37876199		1	67510000	67510599
1	42715600	42715799		1	174495600	174495999		1	29004400	29004599		1	51611200	51611599		1	50827000	50827399		1	37895200	37897399		1	67536200	67537799
1	42727200	42727399		1	174616600	174618599		1	29012200	29013399		1	51825200	51825599		1	50880600	50881199		1	37905800	37906399		1	67631200	67632799
1	42735400	42735599		1	174821600	174821999		1	29032600	29032799		1	52027200	52027399		1	50915000	50915799		1	37932200	37933399		1	67648800	67649199
1	42770800	42770999		1	174866200	174866399		1	29055600	29056199		1	52100600	52100799		1	50926400	50926599		1	37986800	37988399		1	67801600	67802199
1	42810000	42810199		1	174913400	174915799		1	29090800	29091399		1	52214400	52214799		1	50927800	50927999		1	37998600	37998799		1	67803800	67804199
1	42937600	42937999		1	174917800	174917999		1	29116800	29117199		1	52294400	52295399		1	51167200	51167599		1	38010600	38010799		1	67977200	67977399
1	43304400	43304599		1	175855800	175857399		1	29135000	29135999		1	52381000	52381199		1	51282400	51282599		1	38016400	38016599		1	67984600	67985999
1	43327200	43327399		1	176097800	176097999		1	29168200	29168399		1	52524200	52525399		1	51339400	51339599		1	38019400	38021799		1	68193800	68194199
1	43339800	43339999		1	176178200	176178999		1	29179000	29179399		1	52713600	52713799		1	51374600	51374799		1	38045400	38045999		1	68317000	68317799
1	43356800	43356999		1	176880400	176880799		1	29186000	29187199		1	52776000	52776799		1	51404000	51404199		1	38052400	38052599		1	68366200	68366799
1	43371800	43371999		1	177116600	177116999		1	29212600	29212799		1	52797400	52797799		1	51408200	51408999		1	38094800	38095199		1	68441600	68442199
1	43437600	43437999		1	177132800	177133999		1	29236400	29236599		1	52860400	52860599		1	51414600	51414999		1	38109000	38109599		1	68535000	68535399
1	43465800	43465999		1	177371400	177372599		1	29239200	29239399		1	52868400	52869199		1	51484600	51484999		1	38152400	38153199		1	68729400	68730399
1	43526600	43526799		1	177526800	177528199		1	29251000	29251199		1	52885000	52885199		1	51523200	51523599		1	38180800	38181999		1	68830000	68830199
1	43563400	43564399		1	177973000	177973199		1	29282600	29282999		1	52962600	52963599		1	51551600	51551799		1	38250200	38251199		1	69147600	69147799
1	43609200	43609399		1	178266600	178266799		1	29295000	29295399		1	53021600	53021999		1	51568400	51568599		1	38511800	38512599		1	69179600	69180399
1	43616000	43616199		1	178343800	178344199		1	29319000	29319799		1	53054000	53054199		1	51678000	51678399		1	38519400	38519799		1	69351400	69351599
1	43659200	43659599		1	178348800	178350599		1	29323800	29324799		1	53081000	53081199		1	51798800	51800999		1	38717600	38718199		1	69680800	69681399
1	43660600	43660799		1	178469400	178469799		1	29329200	29329399		1	53084200	53084599		1	51814800	51815199		1	38769200	38769399		1	69757400	69757599
1	43673800	43673999		1	178525200	178526399		1	29354800	29355599		1	53106000	53106399		1	51817400	51817799		1	38833600	38833999		1	69801000	69802599
1	43794800	43794999		1	179078800	179079399		1	29422200	29422399		1	53119800	53119999		1	52092000	52092599		1	38910600	38912599		1	69893200	69893799
1	43839800	43839999		1	179251600	179251799		1	29477600	29478199		1	53149200	53150199		1	52145600	52145999		1	39004000	39005399		1	69919200	69919599
1	43864400	43864599		1	179334200	179335599		1	29482200	29482399		1	53278800	53279599		1	52257200	52258599		1	39115200	39117199		1	69931400	69932599
1	43875600	43875799		1	179461800	179462199		1	29498000	29498799		1	53344800	53344999		1	52296400	52296599		1	39130600	39132199		1	69960600	69961199
1	43932400	43932799		1	179823000	179823599		1	29521600	29521799		1	53393000	53393199		1	52380400	52380799		1	39188200	39188599		1	70192600	70193199
1	43988000	43988799		1	179885000	179886399		1	29586800	29587199		1	53530000	53530399		1	52483400	52483599		1	39256400	39256599		1	70307800	70309399
1	44060600	44060999		1	180014200	180015399		1	29595600	29595999		1	53632000	53632199		1	52490200	52490399		1	39291000	39291199		1	70339400	70340199
1	44093400	44093999		1	180041400	180042599		1	29601000	29601199		1	53682200	53682399		1	52515600	52516199		1	39313800	39314599		1	70345200	70346199
1	44107000	44107199		1	180083600	180085199		1	29606000	29606199		1	53693800	53694999		1	52550000	52550399		1	39464000	39464599		1	70394800	70395199
1	44113800	44113999		1	180393000	180393599		1	29627200	29627999		1	53833000	53834399		1	52564600	52564799		1	39566800	39567199		1	70430200	70431399
1	44193200	44193399		1	180705400	180705799		1	29664800	29665599		1	53907800	53907999		1	52597000	52597399		1	39663200	39664199		1	70435000	70435199
1	44197600	44197799		1	180932600	180933199		1	29679000	29679199		1	54015200	54015399		1	52610800	52611199		1	39667800	39668199		1	70474600	70475199
1	44302000	44302199		1	181305600	181306799		1	29717600	29717999		1	54057400	54057599		1	52702200	52702399		1	39754200	39754399		1	70480000	70480399
1	44304000	44304399		1	181350800	181350999		1	29786200	29787199		1	54083800	54084199		1	52704400	52704599		1	39923800	39924399		1	70498000	70498999
1	44362600	44363599		1	181555400	181556799		1	29821600	29821999		1	54218200	54218399		1	52748000	52748399		1	40019800	40020999		1	70562400	70562999
1	44387600	44388199		1	181921400	181921799		1	29830200	29830599		1	54533200	54534799		1	52843800	52843999		1	40022000	40023399		1	70564400	70565199
1	44400200	44400399		1	182175400	182175599		1	29844000	29844799		1	54646600	54646799		1	52856800	52857199		1	40033800	40033999		1	70717800	70718199
1	44451600	44451799		1	182249200	182249599		1	29848800	29848999		1	54676800	54677999		1	52905200	52905399		1	40117000	40117199		1	70763200	70763799
1	44547000	44547199		1	182390600	182391799		1	29893000	29893799		1	54738600	54739999		1	52949600	52950199		1	40286600	40286999		1	70881800	70881999
1	44615000	44615199		1	182678600	182678799		1	29895600	29896399		1	54873600	54873799		1	53009000	53010199		1	40299400	40299999		1	70891600	70892799
1	44736400	44736599		1	183076800	183076999		1	29897400	29897999		1	55070800	55070999		1	53017800	53018599		1	40318200	40319399		1	71310600	71310999
1	44769200	44769799		1	183386600	183387199		1	29903600	29904199		1	55090400	55090599		1	53019600	53019799		1	40339000	40340199		1	71315400	71315999
1	44805800	44805999		1	183388200	183388399		1	29929200	29929399		1	55186800	55186999		1	53087000	53087399		1	40423400	40424199		1	71407200	71408399
1	44873000	44873199		1	183680200	183681599		1	29971800	29972399		1	55189400	55189599		1	53100200	53100399		1	40525000	40525399		1	71433200	71434399
1	44974200	44974399		1	183767400	183768199		1	29976400	29977399		1	55217800	55218399		1	53103000	53103399		1	40606200	40606399		1	71444400	71445599
1	45152000	45152599		1	184788400	184789599		1	30057200	30057999		1	55332600	55333199		1	53151000	53151399		1	40625800	40626199		1	71484000	71485599
1	45246400	45246599		1	184866800	184867799		1	30096000	30096199		1	55628200	55628399		1	53176400	53176599		1	40655200	40655599		1	71590200	71590599
1	45280200	45280399		1	185131800	185132399		1	30133200	30133799		1	55755600	55756999		1	53217200	53218799		1	40715000	40716199		1	71705400	71705999
1	45284400	45285199		1	185163400	185163599		1	30142600	30142999		1	55769800	55770199		1	53269200	53269799		1	40745400	40745799		1	71754400	71754999
1	45376000	45376199		1	185596200	185598599		1	30166600	30167599		1	55798600	55798799		1	53298200	53298799		1	40762200	40762599		1	72155000	72155799
1	45381200	45381599		1	185755800	185756399		1	30173600	30174399		1	55860400	55861399		1	53376800	53376999		1	40765800	40766799		1	72190600	72190999
1	45620200	45620399		1	186046000	186047799		1	30217800	30218199		1	55882400	55882599		1	53551200	53552399		1	40807600	40808599		1	72247600	72247999
1	45692000	45692199		1	186070600	186071799		1	30261200	30261399		1	56065600	56066999		1	53563600	53564999		1	40815400	40816599		1	72282800	72283199
1	45705000	45705199		1	186318800	186320399		1	30314200	30314399		1	56287000	56287199		1	53575400	53576199		1	40823600	40823999		1	72287200	72287999
1	45744000	45744399		1	187074200	187074599		1	30322000	30322199		1	56350200	56350399		1	53583800	53583999		1	40835200	40835599		1	72317600	72318199
1	45769600	45770599		1	187174000	187174999		1	30351600	30353199		1	56411600	56411999		1	53746200	53746399		1	40859600	40859999		1	72403800	72404199
1	45834800	45834999		1	188142200	188142599		1	30360200	30360799		1	56427400	56428199		1	53773600	53773799		1	40994400	40994599		1	72550800	72551199
1	45850200	45850399		1	188365600	188370599		1	30367600	30367999		1	56441200	56441999		1	53781000	53781199		1	41056600	41057399		1	72590800	72591399
1	45942200	45942399		1	188427600	188428399		1	30391000	30391199		1	56575000	56575599		1	53847000	53847399		1	41064000	41065599		1	72622600	72622799
1	45957600	45957799		1	188699000	188700199		1	30397400	30397599		1	56816200	56817799		1	53954400	53955599		1	41084800	41085999		1	72661600	72661999
1	46148600	46148799		1	189127000	189127199		1	30446800	30447399		1	56825400	56826399		1	53965800	53965999		1	41110600	41111999		1	72834400	72834599
1	46186000	46186199		1	190027200	190027599		1	30572800	30573799		1	57014200	57014399		1	53967600	53967799		1	41181600	41182999		1	72860800	72861199
1	46342200	46343599		1	190241000	190242199		1	30697000	30697399		1	57126000	57126199		1	54032400	54032799		1	41266000	41266999		1	72866000	72866799
1	46405600	46405799		1	191135000	191135399		1	30785600	30787399		1	57222800	57223799		1	54037000	54037199		1	41322800	41324599		1	72871000	72872599
1	46426000	46426199		1	191821000	191821199		1	30788200	30788399		1	57282200	57283599		1	54040200	54040599		1	41339400	41339999		1	72987800	72988799
1	46511200	46511399		1	192315800	192316199		1	30887400	30887599		1	57522600	57522999		1	54057000	54057199		1	41383600	41384399		1	73061000	73062399
1	46658000	46658199		1	192363200	192363599		1	31000000	31000199		1	57567600	57567799		1	54102000	54102199		1	41404400	41404599		1	73109400	73109599
1	46741400	46741599		1	192678800	192679199		1	31070000	31071199		1	57572800	57572999		1	54189200	54189399		1	41422000	41422599		1	73197600	73197799
1	46788400	46788599		1	192992000	192992799		1	31083200	31083599		1	57590400	57590599		1	54237000	54237399		1	41459800	41460199		1	73387600	73388399
1	46794600	46794799		1	192995400	192995999		1	31095000	31095399		1	57719800	57720199		1	54365800	54366199		1	41503000	41504199		1	73426200	73426399
1	46882600	46882999		1	193202200	193202999		1	31106400	31106799		1	58102800	58103199		1	54492600	54493199		1	41564600	41564999		1	73493400	73493599
1	46901400	46901599		1	193271200	193271399		1	31147200	31147399		1	58236200	58236399		1	54533200	54533399		1	41655000	41655999		1	73528400	73528799
1	46930400	46930599		1	193275400	193276599		1	31150000	31150999		1	58339800	58340399		1	54636000	54636199		1	41710600	41711799		1	73566000	73566399
1	46963200	46963399		1	193322000	193322199		1	31189000	31189199		1	58349400	58349599		1	54642000	54642199		1	41746600	41746999		1	73695800	73695999
1	47036800	47036999		1	193357000	193359199		1	31209800	31210199		1	58558000	58558199		1	54655600	54655799		1	41758800	41760599		1	73811400	73811799
1	47050800	47050999		1	193744400	193746799		1	31265800	31265999		1	58712800	58712999		1	54663800	54664199		1	41784400	41784799		1	73836600	73836999
1	47069400	47069799		1	193754000	193754999		1	31352600	31353599		1	58724400	58725599		1	54679200	54679799		1	41804000	41804799		1	73853400	73853799
1	47139600	47139799		1	193909800	193910199		1	31372400	31372999		1	58955800	58955999		1	54744200	54744399		1	41824000	41825399		1	73879200	73879799
1	47160600	47161399		1	194062000	194064399		1	31375200	31375799		1	59057200	59057599		1	54811400	54811799		1	41877000	41877599		1	74072000	74072199
1	47207600	47207799		1	194341000	194342399		1	31398600	31398799		1	59063600	59063999		1	54827800	54827999		1	41906400	41907399		1	74268000	74268599
1	47236400	47236599		1	194554600	194554799		1	31447600	31447999		1	59226400	59227599		1	55027600	55027799		1	41910800	41911199		1	74359200	74359599
1	47339200	47339399		1	194795200	194796399		1	31450200	31450599		1	59303000	59303199		1	55057000	55057199		1	41941400	41942599		1	74370000	74370399
1	47406200	47406399		1	194905400	194905999		1	31495000	31495199		1	59440000	59440999		1	55130400	55131599		1	41967000	41967199		1	74390400	74390999
1	47436000	47436199		1	195084400	195085599		1	31516800	31516999		1	59477800	59478799		1	55135600	55136399		1	41987400	41987999		1	74425200	74425599
1	47549400	47549799		1	195125000	195126599		1	31518200	31518399		1	59624200	59624399		1	55159600	55159999		1	42036800	42037199		1	74475400	74476199
1	47703800	47703999		1	195201800	195203199		1	31531000	31532399		1	59789600	59789999		1	55177000	55177199		1	42088400	42089399		1	74515800	74516199
1	47715200	47715599		1	195283200	195284599		1	31555800	31556799		1	59801600	59801799		1	55184000	55184599		1	42160800	42161399		1	74536400	74536599
1	47720400	47720799		2	3053800	3053999		1	31576200	31576799		1	59839000	59839399		1	55194600	55194799		1	42287600	42288199		1	74588400	74588599
1	47808400	47808599		2	4996400	4997199		1	31578000	31578399		1	59932600	59932799		1	55216000	55216399		1	42404600	42405999		1	74605400	74606399
1	47828000	47828199		2	5257200	5259399		1	31600800	31600999		1	59961600	59962399		1	55265600	55266199		1	42414800	42414999		1	74719200	74722199
1	47843200	47843599		2	5603600	5604599		1	31654600	31654999		1	60111200	60111399		1	55342000	55342999		1	42416000	42417999		1	74731200	74731399
1	47867600	47867999		2	5657400	5657599		1	31658200	31659199		1	60152000	60153399		1	55395200	55395799		1	42462600	42462999		1	74840200	74841599
1	47905000	47905199		2	6179000	6179799		1	31666600	31667999		1	60193600	60193999		1	55513800	55514199		1	42565000	42565999		1	74858200	74858599
1	48037400	48037599		2	6824200	6824799		1	31672600	31673399		1	60195200	60195399		1	55563200	55563599		1	42594400	42594799		1	74893800	74895199
1	48099200	48099799		2	7146600	7147399		1	31702800	31702999		1	60269800	60269999		1	55607200	55607599		1	42654400	42655199		1	74995000	74995399
1	48105600	48105799		2	7253800	7254199		1	31710000	31710199		1	60713800	60713999		1	55660400	55660599		1	42714400	42714599		1	74996800	74996999
1	48332400	48332799		2	7458400	7460199		1	31742600	31743799		1	60770600	60770999		1	55694800	55694999		1	42829600	42829999		1	75018800	75018999
1	48417400	48417599		2	7462000	7462599		1	31786200	31786599		1	60839200	60839599		1	55789800	55790199		1	42928000	42929799		1	75136200	75136599
1	48460400	48460799		2	7635600	7635999		1	31799600	31800999		1	60954400	60955199		1	56010600	56011199		1	42996800	42998399		1	75140000	75140399
1	48602200	48602399		2	7704600	7704999		1	31843400	31843999		1	61044200	61044599		1	56172200	56172399		1	43012400	43012799		1	75244600	75245599
1	48650800	48650999		2	7707400	7709599		1	31863400	31863799		1	61124600	61124999		1	56239400	56239799		1	43036000	43036799		1	75317000	75317399
1	48789600	48789999		2	8476800	8477199		1	31867200	31867399		1	61285800	61285999		1	56264000	56264399		1	43159800	43161599		1	75318200	75318599
1	48799000	48799199		2	8600200	8601599		1	31877000	31877399		1	61298000	61298599		1	56313800	56314999		1	43171600	43171799		1	75347200	75347599
1	48835000	48835199		2	9006200	9006599		1	31881000	31881199		1	61361600	61361799		1	56347800	56348599		1	43208600	43209599		1	75376400	75376799
1	48839600	48840399		2	9033400	9034599		1	31898200	31898999		1	61393600	61393799		1	56386600	56386999		1	43253200	43253599		1	75462000	75462399
1	48843200	48844199		2	9147000	9148599		1	31901800	31902399		1	61544000	61544199		1	56398000	56398199		1	43277800	43277999		1	75474000	75474999
1	48859000	48859199		2	9182800	9182999		1	31905600	31905799		1	61649800	61650199		1	56431600	56431999		1	43365400	43366199		1	75500200	75500599
1	48921600	48921799		2	9631600	9632799		1	31985400	31986599		1	61694000	61694399		1	56595400	56595799		1	43371200	43371399		1	75534000	75534199
1	49044800	49044999		2	9775400	9777199		1	32049400	32049599		1	61847600	61847799		1	56712800	56713199		1	43404200	43404999		1	75539600	75539999
1	49067400	49067599		2	9974800	9975199		1	32097600	32098799		1	61854800	61854999		1	56714400	56714999		1	43600000	43600999		1	75580000	75580599
1	49068400	49069199		2	10046200	10046399		1	32122200	32122999		1	61881400	61882799		1	56876400	56876599		1	43712400	43712999		1	75596600	75596799
1	49077600	49078399		2	10313400	10314399		1	32187200	32187599		1	61914400	61915199		1	56980800	56980999		1	43719200	43720199		1	75621800	75622799
1	49238000	49238199		2	10620000	10621999		1	32198600	32198999		1	61929200	61929799		1	57163200	57163599		1	43728800	43729399		1	75641400	75641599
1	49514800	49514999		2	11140600	11140999		1	32229400	32229599		1	61973200	61975399		1	57363400	57363599		1	43772800	43773799		1	75656000	75656199
1	49543200	49543399		2	11331200	11331399		1	32249400	32249599		1	62055600	62055999		1	57372600	57372799		1	43902800	43903199		1	75741200	75741599
1	49642800	49642999		2	11658200	11658599		1	32252400	32252599		1	62072000	62072799		1	57434600	57434799		1	43942800	43943999		1	75811000	75811599
1	49788400	49788799		2	11697200	11698599		1	32291600	32291799		1	62109200	62110199		1	57589000	57589399		1	43949600	43950199		1	75885600	75885799
1	49789600	49789799		2	11926400	11927599		1	32296200	32296399		1	62253800	62253999		1	57666600	57666799		1	43958600	43958799		1	75902800	75903399
1	49838400	49838599		2	12400000	12400999		1	32305000	32305599		1	62279800	62281999		1	57733800	57734199		1	43984800	43985199		1	75910200	75911999
1	49919800	49919999		2	12481200	12482199		1	32348600	32348799		1	62306000	62306199		1	57774400	57774599		1	43988600	43989999		1	75929600	75929999
1	49958000	49958799		2	12516200	12516399		1	32349800	32350599		1	62314000	62314199		1	57838200	57838399		1	43995200	43996399		1	76036000	76036599
1	49961000	49961599		2	12680400	12681999		1	32363600	32364399		1	62337800	62338599		1	57936400	57936599		1	44021000	44022799		1	76157600	76157999
1	49968800	49969199		2	12732600	12733799		1	32415800	32416399		1	62375400	62375999		1	57989200	57989399		1	44164200	44165199		1	76365200	76365599
1	50002400	50002599		2	12745800	12746599		1	32433600	32433999		1	62610200	62610599		1	58093600	58094199		1	44174400	44174999		1	76722600	76722999
1	50131800	50131999		2	12973800	12974799		1	32435200	32435799		1	62758200	62758399		1	58163400	58163599		1	44188600	44188999		1	76904400	76904599
1	50151400	50151799		2	13329200	13329599		1	32467200	32467399		1	62790600	62790799		1	58194600	58194799		1	44219400	44219799		1	77090200	77090599
1	50186000	50186199		2	13445400	13445999		1	32549800	32550199		1	62825600	62825799		1	58236200	58236399		1	44240000	44241199		1	77149400	77150399
1	50225000	50225199		2	13503800	13505199		1	32557400	32557599		1	62892600	62892799		1	58262600	58263199		1	44243200	44244199		1	77227000	77227199
1	50353600	50353799		2	13524800	13525799		1	32580000	32580799		1	62938600	62938799		1	58296800	58297199		1	44276200	44277599		1	77250800	77250999
1	50376600	50376799		2	13992800	13992999		1	32586800	32587399		1	63050600	63050799		1	58302000	58302199		1	44342600	44342999		1	77284000	77284199
1	50384400	50384799		2	13994200	13996399		1	32599600	32600199		1	63080200	63080399		1	58435200	58436399		1	44388800	44389799		1	77390000	77390799
1	50516000	50516199		2	14135400	14136599		1	32655800	32656599		1	63089000	63089799		1	58563800	58564199		1	44400400	44401199		1	77445600	77445799
1	50578400	50578599		2	14227400	14228799		1	32699000	32699199		1	63354200	63354399		1	58632200	58632599		1	44412000	44412599		1	77500000	77500599
1	50613400	50613599		2	14272600	14272999		1	32749800	32749999		1	63397600	63398599		1	58654600	58654799		1	44573800	44574999		1	77512200	77512599
1	50695000	50695199		2	14595800	14597199		1	32797800	32798999		1	63440400	63441199		1	58668800	58669399		1	44579800	44581399		1	77521400	77521599
1	50752200	50752399		2	14621600	14623399		1	32816200	32816399		1	63470000	63470199		1	58679800	58680999		1	44585800	44586799		1	77545000	77545399
1	50810800	50810999		2	15252800	15253399		1	32821800	32822399		1	63481400	63481599		1	58686000	58686599		1	44677000	44677799		1	77630400	77630999
1	50829800	50829999		2	15259200	15259599		1	32825200	32825799		1	63490000	63490399		1	58692000	58692199		1	44679400	44679799		1	77669200	77669599
1	50849800	50849999		2	15398400	15399799		1	32932000	32932999		1	63499600	63500199		1	58712000	58712999		1	44748000	44748399		1	77834800	77836199
1	50862800	50863999		2	15558800	15558999		1	32952800	32953199		1	63527400	63527599		1	58717000	58718199		1	44767800	44768199		1	77954600	77955199
1	50911000	50911399		2	15594400	15594799		1	33076200	33077399		1	63750200	63750399		1	58722200	58722399		1	44778000	44779399		1	78188800	78188999
1	50928800	50928999		2	15652400	15652799		1	33088600	33088999		1	63796200	63796399		1	58724400	58724599		1	44798600	44798799		1	78202000	78202199
1	50933000	50933399		2	15672800	15672999		1	33093600	33093999		1	64019600	64021399		1	58744800	58744999		1	44800000	44800399		1	78250600	78250999
1	50965400	50965999		2	15898200	15898599		1	33103400	33104799		1	64085200	64085999		1	58746200	58746399		1	44812200	44812799		1	78302400	78302599
1	50980200	50980399		2	15943000	15944799		1	33215400	33215799		1	64104600	64104799		1	58891800	58891999		1	44834000	44835799		1	78347600	78348799
1	51185800	51185999		2	16294600	16296199		1	33268400	33268999		1	64146600	64146799		1	58896600	58896999		1	44956200	44957599		1	78382400	78382999
1	51243600	51243799		2	16655800	16657199		1	33285600	33285999		1	64205800	64206599		1	58954200	58954599		1	44973800	44974399		1	78501200	78501599
1	51315200	51315399		2	16683000	16683199		1	33316400	33317399		1	64281000	64281199		1	59034400	59034799		1	45142800	45142999		1	78519800	78522399
1	51447000	51447199		2	16743400	16743999		1	33437000	33437199		1	64338000	64339399		1	59067000	59067199		1	45154200	45154999		1	78580800	78580999
1	51491800	51491999		2	16896400	16896599		1	33438800	33439199		1	64419400	64419599		1	59079200	59080199		1	45275400	45276399		1	78590600	78592199
1	51601200	51601399		2	18353000	18353199		1	33467400	33467799		1	64448200	64448599		1	59116200	59116399		1	45299600	45301399		1	78593800	78594799
1	51604600	51604999		2	18357200	18357599		1	33476400	33476599		1	64477600	64477799		1	59130000	59130199		1	45311200	45311799		1	78750800	78751999
1	51614200	51614599		2	18558800	18559199		1	33641200	33641399		1	64489200	64489599		1	59146600	59146799		1	45314800	45315799		1	78871200	78871399
1	51681400	51681599		2	18613600	18613799		1	33675200	33675599		1	64601600	64602599		1	59197200	59197399		1	45416800	45418799		1	78880400	78880799
1	51696600	51696799		2	18785400	18786999		1	33774800	33774999		1	64640000	64640999		1	59237400	59237599		1	45599400	45599799		1	78883800	78884399
1	51840600	51841199		2	18988600	18988799		1	33834800	33834999		1	64657800	64658799		1	59285600	59285799		1	45620800	45620999		1	79064000	79064199
1	51845400	51845599		2	19189200	19189799		1	33901000	33901199		1	64667000	64667199		1	59337600	59337999		1	45626200	45626599		1	79205000	79205199
1	51849400	51849599		2	19202000	19202199		1	33933400	33934199		1	65144400	65144599		1	59436800	59437599		1	45660400	45660799		1	79270400	79271399
1	51874800	51875199		2	19277600	19277999		1	33953200	33953799		1	65189200	65189399		1	59440600	59440799		1	45704800	45705199		1	79316800	79317399
1	51913200	51913399		2	19343000	19343199		1	33983600	33983999		1	65203000	65203199		1	59459600	59459799		1	45722000	45723399		1	79322600	79322799
1	51922600	51922799		2	19555000	19555199		1	33989200	33989399		1	65220800	65220999		1	59525600	59525799		1	45761800	45763199		1	79344200	79344599
1	51942200	51942399		2	19994600	19994799		1	34020600	34020999		1	65237400	65237599		1	59537200	59537799		1	45816800	45819999		1	79574800	79575399
1	51944000	51944199		2	20520000	20521999		1	34043800	34044399		1	65367800	65368799		1	59544000	59544399		1	45832000	45832999		1	79595000	79595999
1	51968000	51968199		2	20883800	20883999		1	34071600	34072199		1	65371800	65371999		1	59584800	59584999		1	45861000	45863199		1	79641600	79641999
1	51974800	51974999		2	20964200	20964599		1	34092800	34093999		1	65480200	65480799		1	59632400	59632599		1	45970200	45971599		1	79945200	79946999
1	51996200	51996399		2	21201400	21202399		1	34158000	34158399		1	65503000	65503199		1	59667400	59667599		1	45988200	45988599		1	79996400	79997399
1	52000000	52000199		2	21264800	21265799		1	34231400	34231599		1	65572200	65572399		1	59670200	59670399		1	46039200	46039599		1	80269000	80269399
1	52111000	52111199		2	21405000	21406799		1	34268000	34268399		1	65597000	65597799		1	59681200	59681399		1	46107000	46107599		1	80345400	80345799
1	52304200	52305399		2	21496200	21498799		1	34342600	34343599		1	65642600	65642799		1	59730800	59730999		1	46126800	46128199		1	80471800	80472199
1	52340600	52340799		2	22034800	22035199		1	34395000	34395199		1	65644400	65644799		1	59809000	59809199		1	46166200	46167599		1	80483000	80483199
1	52387600	52387999		2	22264000	22264999		1	34412600	34413399		1	65725800	65725999		1	59816800	59817399		1	46251400	46252199		1	80512400	80512799
1	52419000	52419199		2	22342200	22342399		1	34483200	34483399		1	65839000	65840199		1	59842400	59842799		1	46254400	46256599		1	80563000	80563599
1	52428200	52428399		2	23046600	23046999		1	34495800	34495999		1	65846200	65846799		1	59844600	59845999		1	46396400	46398399		1	80682200	80683199
1	52490000	52490599		2	23195000	23195399		1	34530200	34531399		1	65970200	65970599		1	59865000	59865599		1	46437000	46438399		1	80700200	80700399
1	52552800	52553199		2	23546200	23547199		1	34557000	34558199		1	66045000	66045199		1	59870000	59870199		1	46461000	46462799		1	80739800	80740199
1	52562000	52562199		2	23715600	23716599		1	34564200	34564599		1	66080000	66080199		1	59879200	59879399		1	46512000	46512399		1	80854400	80854799
1	52615600	52615799		2	23844600	23845199		1	34581600	34581799		1	66282800	66283199		1	59959400	59959599		1	46621200	46621799		1	80907800	80908799
1	52665000	52665199		2	24169600	24169799		1	34631200	34631399		1	66302400	66302599		1	59992600	59993599		1	46690200	46690599		1	80961600	80962799
1	52678000	52678199		2	24268600	24269799		1	34658800	34659199		1	66347000	66347399		1	60006600	60007599		1	46842000	46842599		1	81037800	81038399
1	52690000	52690399		2	26568000	26568199		1	34685000	34685199		1	66452000	66453599		1	60026800	60028799		1	46864400	46864599		1	81164600	81164999
1	52706600	52706799		2	26675600	26675799		1	34719800	34720199		1	66459200	66459999		1	60056400	60056599		1	46907200	46907999		1	81241200	81241799
1	52733000	52733399		2	26816000	26816799		1	34834400	34834599		1	66491000	66491199		1	60148000	60148199		1	46914000	46914399		1	81851800	81851999
1	52737600	52737799		2	26828000	26828399		1	34908600	34908799		1	66564800	66567599		1	60153200	60154399		1	46946200	46946599		1	81912200	81912999
1	52748200	52748599		2	27179800	27179999		1	34919200	34919399		1	66629200	66629399		1	60253000	60253199		1	47004800	47005399		1	82042000	82042199
1	52751600	52751799		2	27891600	27893199		1	34958400	34958599		1	66697400	66697799		1	60305600	60305799		1	47140200	47141599		1	82170600	82170999
1	52784800	52784999		2	28508200	28508399		1	35071200	35071999		1	66709200	66709399		1	60385000	60385999		1	47163000	47163599		1	82238800	82239799
1	52789400	52789599		2	28570000	28570199		1	35088200	35089799		1	66750800	66750999		1	60406400	60406599		1	47168000	47168599		1	82293800	82293999
1	53061600	53061799		2	30598000	30598199		1	35140000	35140199		1	66754000	66754199		1	60445400	60445599		1	47233400	47233999		1	82337600	82337799
1	53094200	53094599		2	30822000	30823199		1	35148800	35149199		1	66830800	66831599		1	60490000	60490399		1	47257000	47258399		1	82359200	82360799
1	53227200	53227399		2	30976800	30977399		1	35153600	35153799		1	66851600	66851799		1	60497600	60497799		1	47260400	47261399		1	82405800	82406599
1	53253600	53253799		2	31128200	31128399		1	35222800	35224199		1	66917000	66917199		1	60504000	60504399		1	47302800	47303399		1	82519800	82520199
1	53293600	53293799		2	31896600	31896799		1	35239000	35239199		1	67113400	67113599		1	60511800	60512799		1	47359000	47359399		1	82643800	82644199
1	53497000	53497199		2	31971800	31972999		1	35284200	35284999		1	67153200	67153399		1	60570800	60570999		1	47530800	47533199		1	82661800	82662999
1	53644000	53644199		2	32132200	32132799		1	35287400	35287599		1	67203000	67204199		1	60580400	60580799		1	47544000	47544599		1	82680000	82681399
1	53648800	53648999		2	32257800	32258199		1	35289600	35289799		1	67287400	67287599		1	60627600	60628799		1	47594800	47595799		1	82683600	82683999
1	53650000	53650199		2	32502200	32502399		1	35334600	35335199		1	67512600	67512799		1	60636000	60636799		1	47616200	47617399		1	82818600	82818799
1	53698400	53698599		2	32699600	32699799		1	35477000	35477799		1	67533000	67533199		1	60763000	60763199		1	47661000	47661199		1	83049400	83049599
1	53717200	53717799		2	32943400	32943799		1	35551200	35551799		1	67607000	67607199		1	60786200	60786399		1	47683400	47684399		1	83088600	83088799
1	53786200	53786599		2	33792200	33792599		1	35632000	35632399		1	67725600	67727599		1	60801000	60801199		1	47724000	47724599		1	83397800	83398799
1	53805000	53805199		2	34048600	34052399		1	35651400	35651599		1	67795600	67796799		1	60847600	60847799		1	47792600	47793799		1	83410600	83411199
1	53815200	53815999		2	34316800	34316999		1	35653000	35653199		1	67809200	67809399		1	61209800	61209999		1	47803800	47803999		1	83705600	83705799
1	53823200	53823999		2	34333200	34333399		1	35735800	35736799		1	67835200	67835399		1	61280600	61281399		1	47832200	47832399		1	83772000	83772199
1	53949200	53949399		2	34343400	34343599		1	35764000	35764999		1	67857400	67857599		1	61374600	61374799		1	47835400	47836799		1	83892800	83892999
1	53962400	53962999		2	34350600	34351799		1	35796200	35796599		1	67868600	67869199		1	61404600	61404799		1	47838400	47839399		1	84167200	84169599
1	53968000	53969399		2	34421600	34422599		1	35807000	35807199		1	68026400	68026599		1	61532400	61532999		1	47843600	47843999		1	84234000	84234399
1	53997000	53997199		2	34471000	34471399		1	35860200	35860399		1	68031600	68031799		1	61584600	61584999		1	47853600	47853799		1	84280200	84280399
1	53999600	54000399		2	34483800	34484799		1	35883400	35884599		1	68057800	68058799		1	61710000	61710399		1	47854600	47855999		1	84444200	84444799
1	54013200	54013399		2	34564800	34566399		1	35907000	35908399		1	68068400	68068799		1	61880000	61880399		1	47865000	47865199		1	84474400	84474799
1	54059000	54059399		2	35438400	35439199		1	35972600	35972799		1	68183600	68183999		1	61969000	61969799		1	47897600	47899999		1	84761400	84761799
1	54071600	54071799		2	36223400	36223599		1	35988800	35988999		1	68185400	68186799		1	62138800	62139399		1	47930400	47931399		1	84887200	84887599
1	54088200	54088399		2	37086200	37087199		1	36049600	36050999		1	68226200	68226599		1	62244600	62244799		1	47945600	47946799		1	84899200	84899599
1	54204600	54205399		2	37663000	37664199		1	36150600	36151199		1	68254400	68255799		1	62268400	62269399		1	47950800	47951199		1	84914000	84914199
1	54522400	54522599		2	37692400	37693199		1	36166400	36166599		1	68357000	68357199		1	62321400	62321599		1	48020200	48020599		1	84955800	84957199
1	54545600	54545799		2	37740000	37740799		1	36207400	36207599		1	68379000	68379399		1	62560200	62560599		1	48129400	48130399		1	85029400	85029799
1	54699200	54699399		2	38388200	38389199		1	36237200	36237399		1	68451800	68452199		1	62595400	62595799		1	48189200	48190199		1	85092200	85093999
1	54714200	54714399		2	38618400	38618599		1	36297200	36297599		1	68488200	68488799		1	62737000	62737199		1	48208000	48208599		1	85111800	85112199
1	54771200	54771399		2	38862000	38862799		1	36362200	36362599		1	68490600	68490799		1	62788000	62788199		1	48232600	48232999		1	85247200	85248799
1	54803600	54803799		2	38916400	38917599		1	36385000	36385199		1	68523400	68523599		1	62789000	62789399		1	48251600	48252599		1	85596200	85597199
1	54988000	54988999		2	38938600	38938999		1	36409000	36409399		1	68528400	68528999		1	62797000	62797199		1	48329400	48329799		1	85636600	85636799
1	55022000	55022399		2	38963800	38963999		1	36490800	36490999		1	68556800	68558599		1	62809800	62809999		1	48406800	48407199		1	85723800	85724199
1	55067000	55067199		2	39254000	39256199		1	36497600	36497999		1	68574600	68574799		1	62830400	62830799		1	48411000	48412999		1	85733400	85733599
1	55080800	55080999		2	39372200	39372799		1	36606200	36606799		1	68616600	68617799		1	62843600	62843999		1	48441600	48442199		1	85745400	85745599
1	55128600	55128799		2	39560800	39560999		1	36613600	36613999		1	68631400	68632999		1	63057200	63057599		1	48448800	48449599		1	85822800	85822999
1	55318400	55319199		2	39670000	39670199		1	36673200	36673599		1	68649400	68649599		1	63078400	63078599		1	48505600	48506799		1	85907600	85907799
1	55348400	55348599		2	39710400	39711199		1	36774800	36774999		1	68650400	68650599		1	63126000	63126999		1	48509600	48510599		1	85920200	85920399
1	55370400	55370599		2	40065800	40066799		1	36910000	36911199		1	68660600	68660999		1	63197800	63197999		1	48563600	48565199		1	85934000	85934399
1	55392000	55392199		2	40093800	40094199		1	37049200	37049399		1	68680400	68681599		1	63239200	63239399		1	48593600	48595199		1	85935200	85936399
1	55398600	55398799		2	40334400	40334999		1	37089400	37089599		1	68695600	68696799		1	63240200	63240599		1	48625200	48625399		1	85942400	85942799
1	55432000	55432199		2	40448000	40449799		1	37110800	37110999		1	68746200	68746999		1	63252600	63253199		1	48629200	48629799		1	86004400	86004599
1	55524400	55524599		2	40478600	40481599		1	37133400	37133799		1	68761000	68761199		1	63285400	63285599		1	48647600	48649399		1	86040800	86041199
1	55531600	55531799		2	40562800	40563599		1	37142200	37142399		1	68785800	68785999		1	63333400	63333799		1	48724400	48725399		1	86050000	86050399
1	55552000	55552199		2	40599200	40600599		1	37428400	37428599		1	68900000	68900199		1	63408600	63408799		1	48794200	48794799		1	86059200	86060599
1	55590600	55590799		2	40838800	40841599		1	37443400	37443799		1	68901400	68901599		1	63426600	63426999		1	48812600	48813199		1	86159600	86159799
1	55685600	55685799		2	41128200	41129999		1	37460400	37460799		1	68929200	68929399		1	63444000	63444199		1	48830000	48830999		1	86209600	86209799
1	55745800	55745999		2	41359600	41359999		1	37475800	37476799		1	68945600	68947199		1	63517400	63518399		1	48835800	48837199		1	86278200	86278399
1	55921600	55921999		2	41398600	41398999		1	37496000	37496599		1	68948200	68949599		1	63569400	63569799		1	48850000	48851199		1	86304200	86304599
1	55933200	55933399		2	41551400	41551999		1	37570400	37570799		1	68962000	68962399		1	63583000	63583199		1	48873400	48874399		1	86351600	86351799
1	55941600	55941799		2	41714000	41714599		1	37636200	37636399		1	68989200	68989399		1	63630600	63630799		1	48892800	48893999		1	86403400	86403999
1	55964000	55965599		2	41765400	41767799		1	37639400	37639599		1	68998400	68998599		1	63651400	63651599		1	48903000	48904199		1	86449000	86449799
1	55972400	55972599		2	41859800	41861799		1	37649800	37650199		1	69034200	69034399		1	63672400	63672999		1	48974600	48974999		1	86488000	86488199
1	55987200	55987399		2	41895000	41895799		1	37758600	37759599		1	69055800	69056799		1	63689200	63689599		1	48984000	48984999		1	86711200	86711599
1	55992000	55992999		2	41984400	41985999		1	37801200	37801599		1	69064400	69064799		1	63699200	63699399		1	48997200	48997999		1	86782200	86782599
1	56041800	56041999		2	41998800	41999199		1	37994000	37994399		1	69082400	69083599		1	63706200	63706399		1	49008200	49009199		1	86864000	86864999
1	56068200	56068399		2	42167000	42169199		1	38004600	38004999		1	69132200	69132599		1	63712400	63712799		1	49049600	49050799		1	87004400	87005399
1	56088000	56088199		2	42189400	42190399		1	38005800	38006199		1	69158200	69158999		1	63758800	63759199		1	49092200	49092799		1	87013200	87013399
1	56106200	56106399		2	42206800	42206999		1	38016200	38016599		1	69304600	69305999		1	63965000	63965399		1	49123800	49125599		1	87091000	87091399
1	56184400	56184599		2	42368400	42369199		1	38040200	38042399		1	69429200	69430399		1	64038000	64038399		1	49127400	49128999		1	87146400	87146799
1	56250000	56250199		2	42688600	42689799		1	38043600	38043999		1	69636600	69636799		1	64113000	64113199		1	49151000	49152199		1	87183400	87183799
1	56259200	56259399		2	43283800	43286199		1	38092400	38092599		1	69650000	69650599		1	64175200	64175599		1	49184200	49184799		1	87255400	87255799
1	56292800	56292999		2	43319000	43319799		1	38125600	38126199		1	69686200	69686399		1	64219600	64219999		1	49192800	49194399		1	87263800	87264599
1	56336400	56336599		2	43996600	43997999		1	38142400	38142799		1	69796000	69796399		1	64271800	64271999		1	49220400	49222199		1	87290600	87291799
1	56523000	56523199		2	44117400	44118199		1	38144400	38145399		1	69823800	69824199		1	64296400	64296599		1	49360000	49360999		1	87421800	87421999
1	56548400	56548599		2	44160000	44161199		1	38170200	38170599		1	69833400	69834199		1	64297400	64297799		1	49387400	49387999		1	87622800	87624799
1	56610200	56610599		2	44262400	44263599		1	38207600	38207999		1	69852200	69853199		1	64320800	64320999		1	49403000	49403399		1	87698800	87699999
1	56629200	56629399		2	44432600	44433399		1	38227800	38227999		1	69885000	69885199		1	64498200	64498399		1	49459200	49459599		1	87748400	87748999
1	56640800	56640999		2	44442800	44444199		1	38264200	38265199		1	69995600	69996199		1	64502200	64502399		1	49488400	49489599		1	87812600	87814199
1	56646000	56646199		2	44571800	44572399		1	38284200	38284599		1	70047600	70048399		1	64506400	64506799		1	49494600	49495199		1	87851200	87852599
1	56820800	56820999		2	44691000	44692999		1	38292800	38293999		1	70108000	70108199		1	64513800	64513999		1	49510000	49510399		1	87965600	87965999
1	56870600	56870799		2	44801200	44802399		1	38350600	38350799		1	70128800	70128999		1	64538800	64539199		1	49534200	49534999		1	87971200	87972999
1	56925400	56925599		2	45344600	45345199		1	38355800	38355999		1	70198000	70198399		1	64568400	64568599		1	49556600	49556999		1	88191600	88192199
1	56986400	56986599		2	45571600	45571799		1	38432600	38434999		1	70226600	70227599		1	64610800	64610999		1	49582400	49583199		1	88230400	88231599
1	57032600	57032799		2	46329600	46330799		1	38436000	38436199		1	70317200	70317399		1	64616200	64616399		1	49616800	49617199		1	88255000	88255199
1	57118200	57118399		2	46361600	46361799		1	38506600	38506799		1	70326400	70326599		1	64617600	64617799		1	49619000	49620399		1	88263400	88264799
1	57364200	57364399		2	46674800	46675999		1	38540200	38540599		1	70372600	70373599		1	64630400	64631999		1	49645200	49645399		1	88273000	88275399
1	57378400	57378599		2	46983000	46983799		1	38554400	38555399		1	70391000	70391399		1	64646000	64646599		1	49672800	49673399		1	88280400	88281999
1	57443800	57443999		2	47251800	47254199		1	38769800	38770199		1	70394200	70394399		1	64648000	64648199		1	49715000	49716199		1	88295600	88295999
1	57484200	57484399		2	47293000	47293399		1	38776400	38776599		1	70427000	70427599		1	64652200	64652399		1	49738200	49738599		1	88302600	88303799
1	57548600	57548799		2	47772600	47774199		1	38889400	38889599		1	70431400	70432599		1	64670800	64670999		1	49787600	49788999		1	88308200	88308999
1	57549800	57550399		2	47826000	47826799		1	38904800	38905599		1	70442600	70443799		1	64740000	64740999		1	49804200	49805599		1	88455800	88455999
1	57614600	57615799		2	47853800	47854199		1	38996800	38997199		1	70465800	70465999		1	64781200	64781399		1	49871000	49872399		1	88589200	88589399
1	57632000	57632599		2	48371200	48372599		1	39062800	39062999		1	70496800	70496999		1	64808000	64808399		1	49917800	49918999		1	88605600	88606399
1	57674200	57675199		2	48472600	48473999		1	39072200	39073599		1	70572600	70573199		1	64848200	64848399		1	49968800	49969399		1	88696400	88698199
1	57691000	57691599		2	48510800	48510999		1	39180400	39180599		1	70648000	70648599		1	64983200	64983399		1	49978600	49978799		1	88896200	88896399
1	57716000	57716199		2	48565600	48565999		1	39182800	39182999		1	70773400	70773799		1	65000200	65000799		1	50027400	50028999		1	88904200	88904799
1	57726200	57726399		2	48748400	48749199		1	39212200	39213199		1	70830400	70830999		1	65028800	65029199		1	50042200	50043799		1	88989200	88989799
1	57827000	57827199		2	48828600	48829999		1	39250000	39251199		1	70835800	70836799		1	65033400	65033599		1	50060400	50060799		1	89087400	89087799
1	57856200	57856399		2	48908800	48909199		1	39259000	39259399		1	70852800	70852999		1	65063400	65063799		1	50079600	50080799		1	89103400	89103799
1	57857200	57857399		2	49010800	49010999		1	39413200	39414199		1	70884600	70884799		1	65073400	65073599		1	50111600	50112999		1	89179600	89180799
1	57894200	57894599		2	49522600	49522999		1	39489200	39489399		1	71230400	71230799		1	65075400	65075599		1	50114200	50114599		1	89188200	89188399
1	57921800	57921999		2	49568600	49568999		1	39730600	39730799		1	71414200	71414599		1	65077600	65077799		1	50171800	50172399		1	89263600	89264799
1	58059200	58059399		2	50005400	50005799		1	39831600	39832199		1	71506800	71507199		1	65127400	65127599		1	50295000	50295599		1	89410800	89411799
1	58126200	58126399		2	50269800	50269999		1	39928200	39928399		1	71538800	71539599		1	65186800	65187199		1	50340200	50340599		1	89487800	89489199
1	58177800	58177999		2	50274800	50275199		1	40051600	40051799		1	71559600	71560399		1	65192400	65192999		1	50391200	50392399		1	89495800	89495999
1	58209400	58209599		2	50321800	50322199		1	40114800	40115399		1	71723600	71723799		1	65194400	65194999		1	50443000	50443999		1	89601000	89602399
1	58229200	58229399		2	50538000	50540199		1	40117000	40117199		1	71797200	71797399		1	65279000	65279199		1	50476400	50477999		1	89719800	89720399
1	58263200	58263799		2	50801600	50804799		1	40139400	40139799		1	71952200	71952399		1	65458400	65458999		1	50522400	50522999		1	89768800	89769399
1	58302800	58302999		2	51370000	51370199		1	40182400	40182599		1	71987000	71987599		1	65470200	65470999		1	50572000	50572399		1	89806000	89806399
1	58380000	58380199		2	51460600	51461599		1	40236000	40236999		1	72066800	72067599		1	65638800	65638999		1	50574800	50574999		1	89840000	89840599
1	58390400	58390599		2	51615000	51615399		1	40243600	40243799		1	72096400	72097599		1	65785800	65785999		1	50587000	50587599		1	89870600	89871799
1	58593200	58593399		2	51812400	51813399		1	40377200	40378399		1	72205000	72205199		1	65823000	65823599		1	50614400	50615399		1	89896000	89896399
1	58625800	58626199		2	52442600	52443599		1	40384600	40384799		1	72388400	72388599		1	65862400	65862799		1	50634000	50634599		1	89898200	89898599
1	58641200	58641399		2	52717400	52718799		1	40502400	40502599		1	72411800	72412599		1	65885400	65885999		1	50642800	50643999		1	90104600	90105599
1	58665200	58665399		2	52763000	52764999		1	40513800	40515399		1	72415000	72415199		1	66108000	66108199		1	50660200	50660799		1	90210800	90211599
1	58681400	58681599		2	52905400	52905599		1	40549400	40549599		1	72534000	72534199		1	66145800	66146199		1	50673400	50674599		1	90233600	90234199
1	58737600	58737799		2	52951400	52952399		1	40622000	40622199		1	72558200	72558399		1	66311600	66313199		1	50689200	50689999		1	90309600	90309999
1	58747400	58747599		2	52987800	52988399		1	40786600	40786999		1	72560200	72560399		1	66379400	66379999		1	50727200	50727799		1	90353400	90353799
1	58835400	58835999		2	53150000	53154599		1	40793000	40793599		1	72684400	72684799		1	66436000	66436399		1	50748000	50749399		1	90369400	90369599
1	58886200	58886399		2	53276000	53276399		1	40826400	40826799		1	72705000	72705199		1	66700800	66701399		1	50753600	50754599		1	90595400	90595999
1	58906400	58906599		2	53394400	53394799		1	40840000	40840199		1	72707000	72707399		1	66740800	66741799		1	50794600	50794999		1	90597200	90597599
1	58918400	58918599		2	53517600	53517799		1	40861800	40861999		1	72824400	72824599		1	66752600	66752799		1	50797800	50798399		1	90623000	90623399
1	58930200	58930599		2	53609400	53609999		1	40893800	40894399		1	72899600	72899999		1	66767800	66767999		1	50893200	50894799		1	90715600	90716999
1	58947000	58947199		2	53674200	53674599		1	40905400	40905999		1	72974800	72974999		1	66804000	66804199		1	50913600	50914799		1	90734400	90734799
1	58983800	58983999		2	53702000	53702399		1	40941400	40941599		1	73026600	73026799		1	66805600	66805999		1	50967000	50967799		1	90885800	90885999
1	59006600	59006999		2	53946400	53947999		1	40950800	40950999		1	73066200	73066399		1	66897000	66897199		1	51034000	51034399		1	90906400	90907599
1	59008200	59009599		2	54120000	54120199		1	40995200	40995599		1	73119800	73120199		1	66989200	66989399		1	51065800	51066799		1	91025200	91025399
1	59122800	59122999		2	54514400	54516999		1	41002800	41003999		1	73132600	73132999		1	66990800	66991199		1	51091200	51092999		1	91058400	91058599
1	59134400	59134599		2	54769000	54770399		1	41011200	41012199		1	73229400	73230399		1	66994000	66994199		1	51131200	51131399		1	91246000	91246599
1	59188000	59188199		2	54985600	54987399		1	41014800	41015199		1	73559400	73559599		1	67049200	67049599		1	51146000	51146999		1	91263200	91263799
1	59200000	59200399		2	55277200	55278999		1	41049200	41049399		1	73610200	73610399		1	67080000	67080199		1	51158200	51158599		1	91400000	91400999
1	59295200	59295399		2	55502600	55503199		1	41050200	41050399		1	73699400	73699799		1	67167200	67167599		1	51182600	51184199		1	91424800	91426199
1	59352800	59353199		2	55515600	55516999		1	41065600	41065999		1	73706800	73707199		1	67240200	67240799		1	51196400	51196799		1	91465400	91466799
1	59377400	59377599		2	55686400	55687199		1	41105600	41105799		1	73893000	73893999		1	67266800	67266999		1	51246400	51246799		1	91491000	91491199
1	59401400	59401599		2	55863400	55863799		1	41137400	41138399		1	73899800	73900399		1	67303800	67304199		1	51260200	51260399		1	91504600	91504799
1	59435800	59436999		2	56104000	56106799		1	41177800	41178199		1	74015000	74015199		1	67308000	67308399		1	51292000	51292799		1	91532200	91533399
1	59445200	59445999		2	56171600	56173999		1	41198600	41199399		1	74464400	74464599		1	67363400	67363799		1	51306400	51307599		1	91534400	91534799
1	59486400	59486599		2	56178400	56180199		1	41236800	41237599		1	74502000	74502599		1	67388400	67388799		1	51329600	51330199		1	91613200	91614399
1	59581400	59581599		2	56199400	56201599		1	41251200	41252199		1	74645200	74645399		1	67392800	67393199		1	51394200	51395799		1	91652200	91652999
1	59598600	59598799		2	56391600	56392799		1	41286200	41286599		1	74701400	74701599		1	67432600	67433199		1	51406400	51408399		1	91676000	91676199
1	59627600	59628599		2	56482400	56484599		1	41291000	41291399		1	74894600	74895399		1	67586400	67586799		1	51486200	51486399		1	91680000	91680599
1	59641400	59641599		2	57064800	57067599		1	41338400	41338599		1	75051000	75051199		1	67653400	67654199		1	51506600	51507999		1	91723600	91723999
1	59667000	59667199		2	57280000	57280199		1	41347200	41347599		1	75302600	75302799		1	67821800	67822999		1	51601200	51601399		1	91808000	91808399
1	59672000	59672199		2	57645400	57647399		1	41379200	41379999		1	75323800	75323999		1	67972800	67973799		1	51604800	51606799		1	91813600	91813799
1	59694000	59694199		2	58030800	58031399		1	41410000	41410799		1	75354600	75355599		1	67982400	67982999		1	51725000	51726199		1	91852800	91853399
1	59708000	59708999		2	58520000	58520199		1	41479600	41479799		1	75758400	75759199		1	68031600	68031999		1	51788200	51789199		1	91882600	91882799
1	59737400	59737599		2	58540200	58541399		1	41505200	41505599		1	75832200	75832399		1	68049400	68049799		1	51799400	51799799		1	91897200	91897399
1	59747600	59747799		2	58619600	58619999		1	41526800	41526999		1	75962200	75962399		1	68107800	68108199		1	51814800	51816599		1	91905600	91906199
1	59754000	59754799		2	59139600	59141599		1	41585600	41585799		1	75964200	75965399		1	68205600	68205999		1	51819200	51819799		1	91920800	91920999
1	59800400	59800599		2	59405800	59406999		1	41626200	41628399		1	75990400	75990799		1	68343600	68344399		1	51919000	51919199		1	91936600	91937199
1	59830400	59830599		2	59658000	59658799		1	41646800	41648199		1	75991600	75992599		1	68424000	68424599		1	51929200	51929799		1	91942400	91942799
1	59910000	59910199		2	59890200	59890399		1	41649800	41650599		1	76359400	76359599		1	68428800	68429199		1	52001000	52002399		1	91953800	91954399
1	60045800	60046599		2	60219000	60220399		1	41694400	41695199		1	76419200	76419399		1	68455600	68455799		1	52019400	52020199		1	92005800	92006199
1	60079800	60079999		2	60355400	60356799		1	41698600	41699199		1	76509600	76509799		1	68468400	68469799		1	52054000	52055599		1	92128200	92128599
1	60142800	60143799		2	60402600	60402999		1	41718200	41718799		1	76559200	76560399		1	68632800	68634599		1	52079800	52080399		1	92206000	92206199
1	60146400	60146599		2	60433400	60434799		1	41725800	41726199		1	76578000	76578999		1	68790800	68790999		1	52092000	52093599		1	92226800	92227399
1	60171600	60172599		2	60621000	60621999		1	41737600	41739199		1	76598200	76599199		1	68806600	68806999		1	52168600	52169799		1	92293600	92293799
1	60202400	60202599		2	60981800	60981999		1	41742400	41742599		1	76706800	76706999		1	68902800	68903199		1	52179600	52179999		1	92295600	92295999
1	60222200	60222799		2	61153000	61154199		1	41747800	41747999		1	76758400	76758799		1	68908200	68908999		1	52446800	52447399		1	92424800	92425999
1	60246800	60247199		2	61466600	61466799		1	41763200	41763599		1	76795400	76795599		1	69063000	69063199		1	52501400	52501999		1	92428600	92429599
1	60405200	60405999		2	61468000	61470399		1	41768400	41768799		1	76939200	76939599		1	69121200	69121799		1	52512400	52513199		1	92440800	92440999
1	60486200	60486399		2	61700000	61701599		1	41773200	41773399		1	76972200	76972399		1	69136200	69136599		1	52570200	52570999		1	92443600	92443799
1	60525600	60525999		2	61971400	61972599		1	41877600	41877999		1	76999000	76999199		1	69160600	69160799		1	52576800	52577999		1	92592000	92592399
1	60586000	60586199		2	62078800	62081999		1	41883200	41883599		1	77055400	77055599		1	69230600	69230799		1	52596000	52596399		1	92640000	92641599
1	60604000	60604199		2	62353800	62355399		1	41893600	41894399		1	77074800	77075199		1	69322600	69322799		1	52601200	52602599		1	92650000	92650599
1	60679600	60679799		2	62459600	62459799		1	41895800	41895999		1	77194400	77195599		1	69530200	69530599		1	52603400	52603799		1	92668400	92669599
1	60742200	60742399		2	63007600	63008999		1	41919000	41919599		1	77270800	77271199		1	69899400	69899599		1	52608000	52609199		1	92911800	92912199
1	60810200	60811199		2	63349200	63349799		1	42007000	42007199		1	77303000	77303199		1	69953200	69953399		1	52632400	52632599		1	92920400	92921599
1	60818000	60818199		2	63353800	63355399		1	42016600	42016799		1	77309600	77309799		1	70021000	70021399		1	52705800	52706199		1	92936000	92936999
1	60924400	60924599		2	63376800	63377199		1	42041200	42041599		1	77433600	77433799		1	70127000	70127799		1	52830400	52831799		1	92979000	92980199
1	60934600	60934799		2	63383600	63385199		1	42055800	42057399		1	77463200	77463399		1	70131800	70133199		1	52842400	52843999		1	93050800	93051199
1	60950400	60950599		2	63519000	63519399		1	42106800	42107999		1	77521400	77521599		1	70346000	70346999		1	52867800	52868999		1	93094600	93095399
1	60995600	60995799		2	63713200	63714799		1	42221200	42221399		1	77556200	77556999		1	70405800	70406399		1	52901800	52902599		1	93130200	93130599
1	61050400	61051199		2	63982800	63982999		1	42367000	42367399		1	77664400	77664599		1	70410600	70410999		1	52936800	52936999		1	93138200	93138799
1	61077400	61077799		2	64246800	64247399		1	42472800	42472999		1	77736600	77736799		1	70418600	70418799		1	53008600	53008999		1	93148600	93148999
1	61110800	61111199		2	64261000	64261199		1	42491800	42491999		1	77765600	77765999		1	70481600	70482199		1	53086200	53087599		1	93181200	93181799
1	61182000	61182199		2	64291400	64292399		1	42494800	42496199		1	77851600	77851799		1	70702600	70703199		1	53091200	53091599		1	93192800	93193999
1	61317400	61317599		2	64719400	64719599		1	42521200	42521399		1	77865000	77865399		1	70758600	70758799		1	53148600	53150399		1	93229400	93229599
1	61361000	61361399		2	64752000	64752799		1	42531200	42531599		1	77894000	77894399		1	70837000	70837399		1	53210800	53211599		1	93267200	93267399
1	61406800	61406999		2	65212000	65212399		1	42534000	42534199		1	78038200	78038399		1	70901000	70901399		1	53217200	53218399		1	93281400	93281799
1	61424800	61424999		2	65467600	65470399		1	42540000	42540199		1	78059800	78060199		1	70913200	70913399		1	53255600	53256599		1	93296200	93297199
1	61485200	61485399		2	65513000	65513999		1	42569600	42569999		1	78082000	78083399		1	70952400	70952599		1	53264400	53265399		1	93304400	93304799
1	61558400	61558599		2	65933800	65934599		1	42717200	42717399		1	78111000	78111199		1	71037400	71037999		1	53318200	53319799		1	93310200	93311599
1	61613800	61613999		2	65937200	65937599		1	42732800	42733599		1	78117200	78117399		1	71056200	71056599		1	53363000	53363199		1	93328400	93329199
1	61633000	61633399		2	66395800	66395999		1	42751600	42751799		1	78153200	78153399		1	71065400	71065799		1	53411200	53411599		1	93384000	93384199
1	61655600	61656399		2	66827000	66827599		1	42752800	42752999		1	78251000	78251199		1	71091600	71092799		1	53487600	53487799		1	93450600	93450999
1	61688400	61688599		2	67451600	67453399		1	42754400	42754799		1	78304200	78304399		1	71154000	71155399		1	53546000	53546399		1	93456000	93456599
1	61702200	61702399		2	67700200	67701199		1	42763600	42763799		1	78641000	78641199		1	71166000	71166999		1	53604800	53605399		1	93540400	93540999
1	61744200	61744399		2	67810600	67810799		1	42853000	42853799		1	78727400	78727599		1	71187000	71187399		1	53620800	53621799		1	93557400	93557799
1	61830600	61830799		2	68044000	68044399		1	42965600	42965999		1	78784800	78784999		1	71414200	71414599		1	53654000	53654399		1	93566000	93567199
1	61910000	61910599		2	68398600	68398799		1	42966800	42966999		1	78790200	78790999		1	71477200	71477399		1	53764400	53764999		1	93812200	93812799
1	62019200	62020599		2	68754200	68754799		1	42976400	42976599		1	78925800	78926599		1	71551400	71551999		1	53844000	53845199		1	94018600	94019199
1	62034200	62034399		2	69034400	69034799		1	43007200	43007599		1	79033400	79033599		1	71570200	71570399		1	53850200	53851199		1	94204400	94204799
1	62036600	62036799		2	69093600	69093799		1	43093600	43093799		1	79158000	79158599		1	71672600	71672799		1	53905800	53905999		1	94292400	94293599
1	62138000	62138999		2	69460200	69460799		1	43139400	43139599		1	79294800	79295399		1	71755600	71755799		1	53923000	53923999		1	94536800	94537199
1	62308400	62308599		2	69885800	69887599		1	43144800	43144999		1	79321200	79321399		1	71902600	71902799		1	53929600	53931199		1	94630200	94630599
1	62362600	62363599		2	69908200	69908599		1	43162200	43162399		1	79438800	79439399		1	71913800	71913999		1	53993400	53994199		1	94748200	94749199
1	62382200	62382399		2	70195200	70195399		1	43231800	43233799		1	79497800	79497999		1	71996000	71996199		1	54083200	54084799		1	94813400	94813599
1	62541400	62541599		2	70200800	70201999		1	43241200	43242599		1	79566800	79567199		1	72019600	72019999		1	54258600	54260399		1	94841400	94841799
1	62702200	62702399		2	70467800	70467999		1	43257800	43257999		1	79642600	79642799		1	72133400	72133599		1	54288200	54290599		1	94863600	94864199
1	62712800	62712999		2	70818000	70818399		1	43307600	43307799		1	79855400	79855599		1	72153400	72153599		1	54337600	54338199		1	94875200	94875399
1	62770000	62770199		2	70903800	70903999		1	43419600	43419999		1	80095400	80096799		1	72180600	72180999		1	54384800	54385199		1	94945200	94945799
1	62789600	62789799		2	71005200	71005599		1	43541400	43541799		1	80336000	80336199		1	72195200	72195399		1	54436200	54436599		1	95156600	95157999
1	62838800	62839199		2	71057600	71059199		1	43542600	43542799		1	80488200	80488399		1	72306600	72306799		1	54473200	54474599		1	95248200	95248399
1	62864000	62864199		2	71521400	71522399		1	43588800	43589199		1	80647200	80647399		1	72358400	72358799		1	54490400	54490799		1	95450600	95452799
1	62926000	62926199		2	71562400	71562599		1	43615400	43615799		1	80715600	80715799		1	72381600	72381799		1	54497400	54499599		1	95634200	95635199
1	62942000	62942199		2	71565400	71566399		1	43650000	43650999		1	80783800	80783999		1	72426800	72426999		1	54571600	54572199		1	95717800	95717999
1	63018000	63018199		2	72163000	72164399		1	43677200	43677399		1	80890400	80890999		1	72491000	72491199		1	54589800	54590199		1	95744200	95744799
1	63027200	63028199		2	72205600	72207199		1	43708000	43708399		1	80941200	80941399		1	72499800	72500199		1	54595000	54595399		1	95783000	95784599
1	63111600	63111799		2	72252200	72252599		1	43814000	43814399		1	80943600	80943799		1	72639600	72639799		1	54606600	54606999		1	96213800	96214599
1	63127800	63128199		2	72600800	72600999		1	43848400	43848599		1	80951600	80951799		1	72657000	72658199		1	54623200	54623999		1	96252200	96252799
1	63131200	63131399		2	72718800	72719999		1	43994400	43995199		1	80999600	81000199		1	72785400	72785599		1	54651400	54653599		1	96267600	96268999
1	63199000	63199199		2	73472400	73472799		1	44009400	44009799		1	81003600	81003799		1	72793600	72794199		1	54658400	54658799		1	96449200	96449599
1	63202800	63202999		2	73843800	73844599		1	44015600	44017399		1	81014600	81014799		1	72797600	72797799		1	54792200	54793999		1	96597200	96597799
1	63209800	63209999		2	73869000	73869199		1	44040800	44041199		1	81066800	81066999		1	72822800	72823199		1	54826600	54827199		1	96644400	96644599
1	63283000	63283999		2	73934600	73934999		1	44126400	44127399		1	81109400	81109599		1	72850400	72850999		1	54832200	54833799		1	96937000	96937599
1	63311000	63311199		2	73948200	73949599		1	44171600	44171799		1	81113400	81113599		1	72854400	72854599		1	54882400	54882599		1	97376800	97379199
1	63313800	63314999		2	74006600	74006799		1	44197600	44197799		1	81153000	81153599		1	72862800	72862999		1	54936200	54937199		1	97433600	97435799
1	63370800	63371199		2	74084800	74086199		1	44230800	44231799		1	81278800	81279999		1	72864600	72865399		1	54999200	54999999		1	97477800	97478999
1	63422600	63422799		2	74359600	74361399		1	44296200	44296599		1	81294000	81294199		1	72866800	72866999		1	55118400	55119199		1	97633600	97633999
1	63474000	63474199		2	74574200	74575599		1	44300400	44300599		1	81536200	81536599		1	73229800	73229999		1	55186400	55186999		1	97639800	97639999
1	63500200	63500399		2	74850000	74850999		1	44309400	44309599		1	81589600	81589999		1	73330200	73330399		1	55214200	55215199		1	97762200	97762599
1	63583800	63583999		2	75361200	75361399		1	44331000	44331399		1	81615600	81615999		1	73450200	73450399		1	55219200	55220199		1	97885000	97885199
1	63608400	63608799		2	75532600	75533799		1	44450400	44450599		1	81666200	81666599		1	73509000	73509399		1	55226400	55226799		1	98188600	98189999
1	63642400	63642599		2	75662000	75662999		1	44464200	44464999		1	81728200	81728399		1	73510600	73510799		1	55243200	55244599		1	98447000	98447399
1	63654200	63654399		2	75861000	75861399		1	44539600	44539999		1	81741600	81741799		1	73580800	73580999		1	55245400	55246599		1	98515800	98516599
1	63736200	63736399		2	75948400	75948599		1	44563400	44563599		1	81792200	81792599		1	73616800	73617399		1	55265000	55265199		1	98542000	98542399
1	63747800	63747999		2	76246800	76248999		1	44571800	44571999		1	81818600	81819999		1	73631800	73632199		1	55271200	55272599		1	98548200	98548799
1	63873200	63873399		2	76383400	76385399		1	44577000	44577199		1	81895200	81896599		1	73742000	73742599		1	55311400	55311799		1	98576200	98576599
1	64017400	64017599		2	77004400	77005999		1	44591600	44591799		1	81908200	81908599		1	73818600	73818799		1	55322600	55323199		1	98712800	98712999
1	64131000	64131199		2	77428800	77430599		1	44661400	44661599		1	81910600	81910999		1	73830000	73830399		1	55383400	55383999		1	98736600	98736999
1	64145800	64145999		2	78181400	78184999		1	44677200	44677399		1	81912200	81912599		1	73838600	73838999		1	55431000	55432399		1	98997200	98997799
1	64231800	64231999		2	78447400	78448599		1	44678800	44679799		1	81966600	81966999		1	73908600	73909799		1	55638400	55638599		1	99203000	99203199
1	64320400	64320599		2	78459800	78460799		1	44682600	44682999		1	82036200	82036399		1	73936800	73936999		1	55720200	55720599		1	99260000	99260199
1	64349200	64349399		2	78587600	78589399		1	44707400	44708399		1	82129800	82130599		1	73940000	73940399		1	55756200	55756599		1	99399800	99399999
1	64353200	64353399		2	78905000	78905199		1	44730200	44730399		1	82157800	82157999		1	73948200	73949199		1	55767800	55769599		1	99441800	99443399
1	64450600	64450799		2	79129800	79130199		1	44749400	44750799		1	82212200	82212599		1	74015000	74015199		1	55799400	55799799		1	99459000	99459199
1	64452000	64452199		2	79142600	79143799		1	44764200	44764399		1	82281200	82281599		1	74024600	74024999		1	55972200	55972799		1	99503800	99503999
1	64496000	64496199		2	79271400	79272399		1	44773200	44773399		1	82469200	82469399		1	74068000	74068799		1	55975600	55975799		1	99758000	99758399
1	64547800	64547999		2	79577200	79577399		1	44795600	44795999		1	82767000	82767199		1	74070400	74070799		1	55987400	55987799		1	99897000	99897999
1	64605400	64606199		2	79588200	79589799		1	44811000	44811199		1	83366400	83366799		1	74080000	74080199		1	56000800	56001399		1	99915000	99915199
1	64646200	64646399		2	79606800	79606999		1	44829200	44830199		1	83542000	83542199		1	74111400	74111599		1	56128400	56129399		1	100113200	100113599
1	64680000	64680199		2	79677800	79678799		1	44843400	44844399		1	83572200	83572399		1	74118000	74118199		1	56135400	56136799		1	100173400	100174199
1	64696200	64696399		2	79752400	79754799		1	44866000	44866599		1	83637000	83637399		1	74119400	74119799		1	56221200	56222199		1	100267600	100268199
1	64700200	64700399		2	79834200	79834599		1	44868200	44868399		1	83659000	83659399		1	74125800	74125999		1	56339400	56339999		1	100438800	100438999
1	64871400	64871599		2	80513200	80513399		1	44937600	44937799		1	83689000	83689399		1	74141600	74141799		1	56384800	56384999		1	100768200	100768599
1	64885800	64885999		2	80947800	80948999		1	44950400	44951399		1	83755200	83756599		1	74152600	74153199		1	56450000	56450399		1	100837200	100837399
1	64936000	64936199		2	80956400	80956599		1	44986600	44987599		1	83759600	83760599		1	74188600	74188799		1	56453600	56455199		1	100876400	100876999
1	65013200	65013599		2	81032000	81032399		1	45076000	45076599		1	83894600	83894999		1	74264800	74264999		1	56503400	56505199		1	100961000	100961799
1	65049400	65049599		2	81553800	81554799		1	45105000	45105599		1	83910200	83910599		1	74267600	74268399		1	56508200	56509399		1	100968400	100968799
1	65114800	65114999		2	81652200	81652599		1	45135400	45136999		1	83923600	83923799		1	74269400	74269799		1	56594400	56595399		1	101060600	101061799
1	65139000	65139199		2	81914400	81915999		1	45206800	45207199		1	83998400	83998799		1	74273400	74273799		1	56628400	56628799		1	101157200	101157399
1	65170600	65170799		2	82065600	82067799		1	45263000	45263999		1	84019000	84019199		1	74281400	74281599		1	56635400	56635599		1	101226600	101226799
1	65219600	65220199		2	82095000	82095999		1	45283200	45284599		1	84036600	84036799		1	74319000	74319399		1	56639000	56639799		1	101350600	101350799
1	65488200	65488399		2	82105800	82106999		1	45332800	45333199		1	84285600	84285799		1	74323800	74323999		1	56661000	56661999		1	101641600	101642599
1	65493200	65493399		2	82227200	82227599		1	45346400	45346999		1	84414400	84414799		1	74343000	74343199		1	56722600	56723799		1	101721000	101721399
1	65518600	65518799		2	82949400	82951399		1	45372800	45372999		1	84447600	84447799		1	74351000	74351799		1	56750400	56750599		1	101812200	101813199
1	65554200	65554399		2	83066000	83066999		1	45392600	45394199		1	84671000	84671599		1	74359200	74359399		1	56769400	56771399		1	101918400	101918799
1	65667600	65667799		2	83653200	83653999		1	45410000	45410399		1	84731800	84732599		1	74394600	74394999		1	56802200	56804399		1	102147800	102147999
1	65739000	65739199		2	83765000	83765599		1	45453000	45453199		1	84747600	84747999		1	74420400	74420599		1	56834000	56835599		1	102175000	102176399
1	65751200	65751399		2	84330400	84331999		1	45480600	45481799		1	84882000	84882799		1	74444800	74445999		1	56867200	56869599		1	102224200	102224599
1	65809800	65809999		2	85217200	85217999		1	45491400	45491999		1	85093800	85094199		1	74589600	74589799		1	56871600	56871799		1	102291000	102291399
1	65832200	65832599		2	85222600	85222799		1	45527000	45527399		1	85138800	85138999		1	74610000	74610199		1	56929800	56931399		1	102331600	102331799
1	65862000	65862799		2	85566600	85567799		1	45642400	45642799		1	85256800	85257199		1	74635600	74635799		1	56937200	56937399		1	102397000	102397399
1	65899400	65899599		2	85682000	85682399		1	45681600	45682399		1	85491200	85492199		1	74649800	74649999		1	57086800	57086999		1	102578000	102578599
1	65940600	65940999		2	85950200	85951199		1	45689800	45690399		1	85493400	85493799		1	74768600	74768799		1	57113600	57114199		1	102624000	102624599
1	65958000	65958999		2	86221400	86223799		1	45692200	45693199		1	85502400	85502599		1	74773200	74773599		1	57168000	57168199		1	102644200	102644599
1	66178800	66179799		2	86781600	86781999		1	45697800	45697999		1	85806000	85806799		1	74783600	74784199		1	57178400	57179199		1	102671600	102672399
1	66293800	66293999		2	86915600	86916999		1	45705400	45705599		1	86004400	86004599		1	74785200	74785399		1	57257000	57257199		1	102754200	102754799
1	66300800	66300999		2	87068400	87068799		1	45748600	45748799		1	86287800	86288199		1	74798200	74798399		1	57263200	57263999		1	102803400	102803799
1	66442200	66442799		2	87162200	87162599		1	45754400	45754799		1	86440000	86440399		1	74807600	74807799		1	57366600	57367999		1	102860400	102860799
1	66491400	66491799		2	87296200	87297599		1	45849400	45850399		1	86490000	86490199		1	74813000	74813399		1	57393800	57394399		1	102930800	102930999
1	66571600	66571799		2	87389800	87390399		1	45865800	45866199		1	86574800	86575799		1	74881400	74882599		1	57625200	57625799		1	103213000	103213999
1	66642600	66642799		2	87670600	87672599		1	45885200	45885599		1	86732600	86732799		1	74892000	74893599		1	57701000	57702599		1	103301400	103301599
1	66777000	66777199		2	88114200	88115799		1	45887400	45887599		1	86837000	86837399		1	74910400	74910599		1	57741600	57743199		1	103333400	103333599
1	66805000	66805199		2	88264600	88264999		1	45906800	45906999		1	86942600	86942799		1	74924800	74924999		1	57821800	57823399		1	103468400	103468799
1	66859400	66859599		2	88951000	88952799		1	45907800	45908199		1	87034800	87034999		1	74945600	74945799		1	57910400	57910999		1	103577200	103577599
1	66931400	66931599		2	89014800	89016199		1	45987600	45987799		1	87178000	87178199		1	74951800	74951999		1	57959600	57960799		1	103599600	103599799
1	66956600	66956799		2	89090000	89090199		1	46084200	46084399		1	87337400	87337599		1	74961800	74961999		1	57999000	57999599		1	103643200	103643599
1	66984400	66984999		2	89091000	89092399		1	46119400	46119599		1	87516800	87516999		1	74974800	74974999		1	58121600	58122799		1	103726200	103726599
1	67105600	67105799		2	89372400	89372999		1	46210400	46210999		1	87698800	87698999		1	75142800	75142999		1	58224400	58225399		1	103984000	103985599
1	67119400	67119599		2	89399800	89399999		1	46275200	46275599		1	87707400	87707799		1	75184200	75184399		1	58229000	58229399		1	104048400	104048799
1	67157000	67157199		2	89642800	89643599		1	46281400	46281599		1	87711600	87711799		1	75231800	75231999		1	58268000	58268599		1	104059600	104060199
1	67168200	67168399		2	89991600	89993799		1	46304800	46305199		1	87713400	87713599		1	75234400	75234799		1	58345400	58345799		1	104111800	104111999
1	67199800	67200599		2	90643400	90643599		1	46366000	46366199		1	87808600	87808799		1	75255000	75255199		1	58399000	58399999		1	104254600	104254799
1	67284200	67284999		2	90681400	90681599		1	46381600	46382599		1	87934800	87934999		1	75262000	75262199		1	58480800	58480999		1	104505400	104506999
1	67328200	67328399		2	90814200	90815799		1	46482000	46482799		1	88014200	88014399		1	75298600	75298799		1	58487600	58488999		1	104543800	104544999
1	67369600	67369799		2	90872600	90872799		1	46651000	46651799		1	88071400	88072199		1	75369800	75369999		1	58505000	58505999		1	104861000	104861199
1	67390800	67390999		2	90963400	90963999		1	46662800	46662999		1	88199800	88199999		1	75374400	75375199		1	58514400	58515999		1	104874200	104874799
1	67404200	67404399		2	91343600	91343799		1	46711400	46712399		1	88219000	88219999		1	75382400	75382799		1	58525800	58527199		1	105216800	105217199
1	67480400	67480799		2	91497200	91497399		1	46737400	46738199		1	88225400	88227799		1	75384800	75384999		1	58582000	58582199		1	105224600	105225599
1	67574200	67574599		2	91583400	91585599		1	46749000	46749199		1	88248600	88248999		1	75404800	75404999		1	58605200	58605399		1	105296600	105296799
1	67679200	67679399		2	91812000	91813799		1	46792800	46792999		1	88277600	88277799		1	75412600	75413999		1	58626800	58627799		1	105382800	105382999
1	67720200	67720999		2	92126600	92127799		1	46900600	46901199		1	88289800	88290599		1	75422600	75422799		1	58639000	58641199		1	105416400	105416799
1	67743000	67743199		2	92253200	92254199		1	46946400	46946599		1	88310400	88310599		1	75427600	75427799		1	58694800	58695799		1	105449200	105449599
1	67746800	67746999		2	92259600	92260999		1	46950400	46950799		1	88471000	88471799		1	75456000	75456199		1	58708400	58708799		1	105491400	105491999
1	67925200	67925399		2	93276000	93276399		1	46957800	46959599		1	88515200	88515399		1	75466000	75466399		1	58712800	58712999		1	105495200	105495599
1	67931200	67931399		2	93711800	93712599		1	47021200	47021599		1	88596400	88597799		1	75467800	75467999		1	58733800	58735199		1	105617600	105617799
1	68099000	68099399		2	93947800	93948199		1	47042600	47042999		1	88618600	88618799		1	75476000	75476399		1	58743800	58744199		1	105645000	105645399
1	68114600	68114799		2	94264200	94265199		1	47062600	47062799		1	88703000	88703599		1	75486600	75486799		1	58898000	58898199		1	105672800	105672999
1	68142200	68142799		2	94736400	94737599		1	47078400	47078799		1	88726800	88727999		1	75490600	75490999		1	58915000	58915399		1	105683600	105685199
1	68144400	68144599		2	95039400	95039999		1	47311200	47311399		1	88816400	88817199		1	75511200	75512399		1	58950000	58951799		1	105713800	105714399
1	68153600	68153799		2	95680200	95680599		1	47345200	47345999		1	88839800	88840199		1	75527800	75528199		1	59010200	59011399		1	105728200	105728399
1	68177000	68177199		2	96132400	96132599		1	47349000	47350199		1	89283600	89283799		1	75543400	75543799		1	59047800	59049199		1	105830200	105830399
1	68208400	68208999		2	96167600	96168199		1	47365600	47365999		1	89739400	89740999		1	75547200	75547399		1	59147400	59147999		1	106036800	106037199
1	68228400	68229199		2	96189800	96191199		1	47386600	47386999		1	89861600	89862399		1	75628200	75630799		1	59177000	59177199		1	106267000	106269399
1	68242000	68242399		2	96422200	96422399		1	47401800	47401999		1	89983600	89983799		1	75714000	75715999		1	59213800	59213999		1	106277400	106277799
1	68246400	68246599		2	96858400	96858999		1	47416800	47417599		1	90061400	90061799		1	75745400	75745799		1	59286800	59287999		1	106428400	106428799
1	68254800	68254999		2	96977400	96978599		1	47436200	47436799		1	90074200	90074799		1	75757000	75757399		1	59293600	59294399		1	106464000	106464399
1	68332200	68332399		2	97191200	97191999		1	47493600	47493999		1	90130000	90130399		1	75759000	75759199		1	59309000	59309799		1	106468800	106469799
1	68508600	68508799		2	97366600	97367399		1	47531800	47534399		1	90165200	90165799		1	75786200	75786399		1	59338000	59338799		1	106587000	106587599
1	68516800	68516999		2	97391200	97392399		1	47538600	47538999		1	90181600	90181799		1	75863800	75863999		1	59357000	59357399		1	106629000	106630399
1	68605600	68605999		2	97403600	97405599		1	47559400	47559599		1	90269000	90269199		1	75872800	75872999		1	59401000	59401199		1	106760000	106760399
1	68681600	68681799		2	97508600	97510999		1	47577000	47577799		1	90417200	90417599		1	75897200	75898199		1	59483200	59483399		1	107095400	107095599
1	68703400	68703599		2	98063600	98064799		1	47596200	47597999		1	90728800	90729399		1	75923400	75924199		1	59502000	59502599		1	107298800	107300199
1	68710000	68710199		2	98507800	98508999		1	47618800	47619599		1	91081800	91081999		1	75975200	75975399		1	59536800	59537199		1	107320200	107320799
1	68915600	68915999		2	98583000	98584599		1	47685000	47685199		1	91116800	91117199		1	76020200	76020799		1	59549000	59549399		1	107323200	107323599
1	68961800	68961999		2	98683600	98683999		1	47696000	47696399		1	91142200	91142399		1	76121400	76121999		1	59584200	59584799		1	107350200	107350799
1	68989600	68989799		2	98906800	98907599		1	47700800	47701999		1	91145600	91146199		1	76159000	76159399		1	59599600	59600199		1	107366400	107366599
1	68999600	68999799		2	99219600	99220199		1	47706400	47706999		1	91525200	91525599		1	76232600	76233999		1	59622200	59624199		1	107511600	107511999
1	69029800	69029999		2	99326800	99328599		1	47726400	47726799		1	91758200	91758399		1	76319400	76320799		1	59659000	59659399		1	107748400	107748599
1	69117200	69117399		2	99384800	99385399		1	47730600	47730799		1	91870200	91870399		1	76360400	76360799		1	59717600	59717799		1	107806400	107807199
1	69136400	69136799		2	99650600	99651199		1	47793400	47794399		1	92117600	92117799		1	76506200	76507399		1	59720800	59721399		1	107809000	107809399
1	69213800	69213999		2	99785200	99786399		1	47849000	47849399		1	92235400	92235599		1	76521800	76521999		1	59737600	59738199		1	108188200	108189399
1	69227400	69227599		2	100135400	100136199		1	47918600	47919399		1	92327800	92327999		1	76599600	76599799		1	59739800	59740399		1	108268400	108268999
1	69263600	69263799		2	100235200	100235999		1	47928200	47928399		1	92471800	92472199		1	76646200	76646599		1	59813400	59814199		1	108370200	108370599
1	69311400	69311599		2	100269400	100269799		1	47963000	47963399		1	92625000	92625199		1	76650200	76650399		1	59855200	59855599		1	108495000	108495399
1	69386200	69386399		2	100920200	100921399		1	47976000	47976399		1	92684800	92684999		1	76771800	76772599		1	59892000	59892599		1	108574000	108576999
1	69405000	69405199		2	100938000	100938599		1	48152800	48153599		1	92826400	92826599		1	76810800	76811199		1	59986800	59988199		1	108582000	108582799
1	69425400	69425599		2	101260600	101263999		1	48254400	48254799		1	93063000	93063199		1	76837000	76837599		1	60007200	60007399		1	108615600	108615799
1	69459600	69459799		2	102206200	102207999		1	48280400	48280799		1	93148400	93149399		1	76847600	76847799		1	60046400	60046999		1	108906400	108907599
1	69501600	69501999		2	102426200	102426999		1	48301000	48303599		1	93191800	93192199		1	76877200	76877399		1	60241600	60242199		1	108940400	108940599
1	69540800	69541799		2	102524000	102525399		1	48329000	48330799		1	93203200	93203399		1	76898200	76898399		1	60269400	60269999		1	109004400	109004799
1	69563400	69564199		2	102797800	102799799		1	48346000	48346599		1	93219200	93219399		1	76960000	76960599		1	60330000	60331199		1	109090600	109091399
1	69666600	69666799		2	103011600	103012999		1	48378600	48380999		1	93335800	93335999		1	77123800	77123999		1	60337400	60338799		1	109092600	109092799
1	69678600	69679399		2	103834400	103834999		1	48458400	48458599		1	93448800	93449599		1	77149400	77150399		1	60365200	60366799		1	109147400	109148799
1	69681400	69681599		2	104228800	104229199		1	48506400	48506799		1	93474200	93474599		1	77168600	77168799		1	60448000	60448399		1	109279600	109280599
1	69714400	69714599		2	104393600	104393799		1	48509400	48509599		1	93649200	93649599		1	77177000	77177599		1	60507600	60508199		1	109285200	109285799
1	69717800	69717999		2	104655200	104657199		1	48557200	48557799		1	93657200	93657399		1	77463000	77463399		1	60541600	60542399		1	109298000	109298999
1	69752000	69752199		2	104666800	104666999		1	48560400	48561199		1	93759000	93759199		1	77466000	77466399		1	60683000	60683399		1	109526000	109526399
1	69813600	69813799		2	104698000	104698599		1	48567800	48568799		1	93981400	93981599		1	77514800	77515199		1	60713200	60713599		1	109647800	109647999
1	69887600	69887799		2	104988400	104990799		1	48629000	48629999		1	94109000	94109199		1	77521400	77521599		1	60719800	60720999		1	109665200	109665999
1	69925200	69925399		2	105252800	105253199		1	48779000	48779999		1	94471400	94472199		1	77523800	77524799		1	60722600	60723599		1	109709600	109710599
1	69961600	69961799		2	105290200	105290599		1	48786200	48788599		1	94615000	94615199		1	77528800	77528999		1	60739400	60739799		1	109714000	109714399
1	69962600	69962799		2	105718800	105722399		1	48827200	48827399		1	94617000	94617199		1	77598800	77600199		1	60824000	60825199		1	109882200	109882399
1	69974400	69974599		2	105805200	105805799		1	48836400	48837399		1	94630600	94630799		1	77665800	77666199		1	60829600	60830199		1	109983000	109983599
1	70047000	70047799		2	105856800	105857399		1	48838400	48838599		1	94661200	94661599		1	77683600	77683799		1	60845600	60847999		1	110528000	110528199
1	70076400	70076799		2	105908200	105910199		1	48852800	48853199		1	94673200	94673799		1	77699600	77699799		1	60922200	60923199		1	110537200	110537399
1	70078600	70078999		2	106118600	106120399		1	48890200	48890399		1	94736600	94736799		1	77714800	77715399		1	60978000	60979599		1	110805800	110806599
1	70087400	70087599		2	106241000	106241399		1	48898800	48898999		1	94741200	94741999		1	77730800	77731199		1	60995000	60996999		1	110894200	110894799
1	70147800	70147999		2	106304600	106305399		1	48919000	48919199		1	94779200	94779599		1	78090800	78091599		1	61099000	61099599		1	111319600	111319799
1	70248400	70248599		2	106521400	106522799		1	48920000	48920599		1	94813800	94816799		1	78111200	78111799		1	61180200	61180599		1	111592000	111592399
1	70305800	70305999		2	106591800	106592799		1	48940400	48940799		1	94875600	94875799		1	78121400	78121799		1	61200800	61202799		1	111846200	111846599
1	70318000	70318399		2	106972600	106972999		1	49025200	49025599		1	94987600	94987999		1	78210000	78210399		1	61232200	61233599		1	111999600	112000399
1	70340800	70340999		2	107066400	107067399		1	49032000	49032399		1	95005800	95005999		1	78248800	78249799		1	61235800	61236199		1	112027400	112028399
1	70373400	70373599		2	107484800	107485999		1	49050200	49051199		1	95073400	95074399		1	78284400	78284799		1	61244800	61245199		1	112243600	112243999
1	70394000	70394199		2	107582400	107583199		1	49075200	49075999		1	95106600	95109199		1	78327200	78327399		1	61251800	61252199		1	112261600	112262199
1	70413000	70413399		2	107910200	107910799		1	49102400	49102999		1	95110200	95110399		1	78368000	78368399		1	61267600	61268799		1	112320800	112321199
1	70468000	70468199		2	108107600	108108399		1	49126200	49126599		1	95201400	95202399		1	78396000	78396199		1	61284200	61284599		1	112359800	112360999
1	70499000	70499599		2	108203800	108205799		1	49145600	49145799		1	95239400	95239799		1	78419200	78419399		1	61315200	61315399		1	112379400	112380999
1	70534400	70534599		2	108256400	108258599		1	49147200	49147599		1	95331200	95332399		1	78497000	78497199		1	61356000	61356999		1	112711600	112711999
1	70540400	70540599		2	108517200	108517799		1	49169600	49170199		1	95357600	95357999		1	78582000	78582399		1	61457400	61457799		1	112982800	112984199
1	70543000	70543199		2	108619800	108620399		1	49219400	49219999		1	95362800	95363799		1	78594600	78594799		1	61602800	61603799		1	113038600	113039199
1	70582000	70582199		2	108653000	108653999		1	49221000	49221399		1	95423000	95423399		1	78703000	78703599		1	61681800	61682399		1	113213600	113214199
1	70594200	70594599		2	109028600	109029199		1	49225600	49226199		1	95456800	95457599		1	78722400	78722799		1	61775800	61776999		1	113335200	113335599
1	70648000	70648199		2	109297800	109297999		1	49248000	49248199		1	95526000	95526999		1	78800400	78800599		1	61779800	61781199		1	113503600	113503999
1	70698200	70698399		2	109374600	109375199		1	49279200	49280199		1	95528600	95528799		1	78813400	78813999		1	61857600	61858399		1	113651200	113651599
1	70783800	70783999		2	109473600	109474599		1	49283800	49283999		1	95548800	95548999		1	78817400	78817599		1	61914600	61915599		1	113788800	113788999
1	70871800	70872399		2	109689800	109691199		1	49344400	49344599		1	95621600	95621999		1	78899600	78899999		1	61920000	61921199		1	113811600	113811999
1	70909600	70909799		2	109816200	109817399		1	49380200	49381199		1	95657400	95657799		1	78922600	78922999		1	61924000	61924599		1	113942600	113943999
1	70963000	70963199		2	110307200	110308399		1	49389400	49389799		1	95663200	95663599		1	78933600	78933999		1	61979200	61979999		1	113954200	113954799
1	71022800	71023199		2	110647400	110647999		1	49433400	49433999		1	95678400	95678599		1	78943000	78943399		1	61993800	61994199		1	114026000	114026399
1	71042000	71042799		2	110794200	110794799		1	49445000	49445199		1	95684000	95684999		1	78967000	78967199		1	62010000	62010999		1	114059600	114060399
1	71077600	71077799		2	110921600	110923399		1	49501800	49501999		1	95801800	95802799		1	78989800	78989999		1	62049000	62050999		1	114085800	114086999
1	71112600	71113399		2	111147600	111148599		1	49528400	49529399		1	95835400	95835999		1	79016200	79016799		1	62068800	62069199		1	114198000	114198999
1	71145000	71145199		2	111320800	111322799		1	49564400	49564999		1	95908000	95908199		1	79227200	79227599		1	62075400	62075999		1	114470000	114470199
1	71179800	71180199		2	111752600	111753599		1	49569800	49569999		1	95917600	95918599		1	79288000	79288199		1	62119000	62122199		1	114522400	114522799
1	71355400	71355599		2	112394600	112395799		1	49590000	49590999		1	95937400	95937799		1	79322400	79322799		1	62136800	62137799		1	114762800	114762999
1	71386800	71386999		2	112697000	112698199		1	49638600	49638999		1	96000400	96001599		1	79343200	79343799		1	62209400	62210199		1	114841000	114841399
1	71538200	71538399		2	113051400	113051799		1	49658400	49658799		1	96009800	96009999		1	79513200	79513399		1	62250000	62250399		1	114921200	114921799
1	71587000	71587399		2	113071600	113071999		1	49753600	49754199		1	96050600	96051599		1	79611400	79611999		1	62255600	62255999		1	114995400	114997199
1	71665000	71665199		2	113264400	113265399		1	49755600	49755799		1	96172600	96172799		1	79648800	79648999		1	62264000	62265399		1	115181000	115181199
1	71699000	71699199		2	113482200	113484399		1	49776600	49776799		1	96179200	96179399		1	79697000	79697199		1	62287800	62288399		1	115228200	115229399
1	71740400	71742599		2	113680200	113681199		1	49778000	49778399		1	96220400	96221999		1	79699200	79699399		1	62312400	62313199		1	115584200	115584599
1	71798400	71798599		2	114427400	114427999		1	49809200	49809599		1	96248400	96248599		1	79713800	79713999		1	62360600	62361199		1	115627000	115629199
1	71875200	71875399		2	114453600	114455199		1	49826000	49826199		1	96252800	96252999		1	79748600	79748999		1	62376000	62377599		1	115762000	115762399
1	71895600	71895799		2	114513200	114514399		1	49839800	49840799		1	96307600	96308199		1	79837000	79837199		1	62383400	62383599		1	115868400	115868799
1	71985600	71985799		2	115168600	115171199		1	49843200	49843799		1	96364400	96364599		1	79891800	79892199		1	62476600	62477199		1	115936200	115936399
1	72152000	72152799		2	115404400	115406399		1	49882000	49882799		1	96370200	96371199		1	79895400	79895599		1	62523400	62523599		1	115960400	115960999
1	72170000	72170199		2	115440000	115440399		1	49896400	49896599		1	96396400	96397399		1	79908400	79908799		1	62533000	62533199		1	116078600	116078799
1	72241000	72241199		2	115670600	115671399		1	49905200	49905399		1	96413200	96413599		1	80146600	80147199		1	62694200	62696399		1	116281200	116281799
1	72287000	72287399		2	116176000	116176199		1	49943200	49943399		1	96426400	96426599		1	80153200	80153599		1	62777000	62778399		1	116348600	116349199
1	72336000	72336199		2	116225200	116226599		1	49970800	49971599		1	96469800	96470199		1	80174600	80174799		1	62818200	62818799		1	116364000	116364599
1	72481400	72481599		2	117139800	117140399		1	49992800	49993399		1	96492600	96492999		1	80194400	80195799		1	63088400	63088999		1	116368200	116368799
1	72571600	72571799		2	117749600	117750599		1	50003400	50003599		1	96540800	96541199		1	80328800	80328999		1	63115000	63115599		1	116388000	116388599
1	72614200	72614399		2	117916000	117917799		1	50040000	50040199		1	96557400	96557599		1	80359200	80359399		1	63130600	63130999		1	116620600	116620999
1	72616400	72616999		2	118111400	118111799		1	50083400	50083599		1	96606800	96606999		1	80363600	80363799		1	63147000	63147999		1	116626400	116627199
1	72627200	72627799		2	118372400	118372599		1	50114200	50115199		1	96638600	96638799		1	80416000	80417399		1	63166000	63166199		1	116643000	116643399
1	72649000	72649199		2	118631800	118632199		1	50156200	50156799		1	96662600	96662999		1	80522200	80522399		1	63205600	63206599		1	116720600	116721999
1	72695800	72696799		2	118684800	118685799		1	50208000	50208399		1	96761000	96761199		1	80567800	80568199		1	63264400	63265199		1	116740400	116740999
1	72768200	72768399		2	119421000	119422799		1	50223400	50224599		1	96792400	96792599		1	80602000	80602599		1	63360600	63361399		1	116764400	116764599
1	72781400	72781599		2	119452000	119452399		1	50242400	50242599		1	96870000	96870599		1	80805600	80805799		1	63398200	63398399		1	116790000	116790199
1	72819800	72819999		2	119566000	119566999		1	50271200	50271599		1	96921800	96923599		1	80853600	80854199		1	63432200	63432599		1	116844200	116845399
1	72940800	72941199		2	120251200	120251399		1	50301200	50301399		1	96962000	96962199		1	80869800	80871399		1	63532800	63533199		1	117113600	117114999
1	73014400	73014599		2	120357800	120359199		1	50306000	50306399		1	96970000	96970199		1	80919800	80919999		1	63623400	63623799		1	117297800	117298599
1	73017400	73017599		2	120437800	120437999		1	50322800	50323199		1	96982600	96982799		1	80932200	80932599		1	63694800	63695799		1	117533600	117534399
1	73089400	73089599		2	120573200	120573999		1	50338400	50338799		1	96988800	96988999		1	81076200	81076799		1	63804200	63804599		1	117648400	117648999
1	73179200	73179399		2	120780400	120781599		1	50348800	50348999		1	97065000	97065199		1	81251000	81251599		1	63819600	63819799		1	117650600	117650999
1	73199800	73199999		2	120950800	120951599		1	50353600	50353799		1	97139800	97140599		1	81295600	81295999		1	63856000	63856799		1	118039600	118039799
1	73501800	73501999		2	120978800	120979799		1	50367200	50367799		1	97252200	97252399		1	81464200	81464399		1	63881000	63881399		1	118091600	118093199
1	73513600	73513799		2	121158600	121159999		1	50406400	50406799		1	97256000	97257199		1	81508800	81509799		1	63895400	63895999		1	118305000	118305399
1	73569600	73569799		2	121896000	121897199		1	50503400	50503799		1	97339600	97339799		1	81552800	81553399		1	63929200	63929999		1	118328000	118328599
1	73570800	73570999		2	122024600	122026399		1	50525800	50526199		1	97435600	97435799		1	81555400	81555599		1	63954000	63955599		1	118339800	118340399
1	73672600	73672799		2	122503600	122504599		1	50601000	50601399		1	97477800	97478599		1	81585800	81586999		1	63967200	63967799		1	118344800	118344999
1	73686800	73686999		2	122594800	122595599		1	50665800	50666199		1	97506400	97506599		1	81623200	81623599		1	63983200	63983999		1	118442400	118442799
1	73710800	73710999		2	122707400	122707799		1	50800800	50803399		1	97520000	97520199		1	81703000	81703199		1	63991400	63991799		1	118469200	118469399
1	73797400	73797599		2	122949000	122949199		1	50818200	50818399		1	97679200	97679399		1	81721200	81721999		1	64093400	64094399		1	118662600	118663199
1	73798800	73798999		2	123137600	123138399		1	50843600	50843999		1	97684000	97684199		1	81859800	81860199		1	64097800	64098199		1	118665200	118665399
1	74056400	74056599		2	123184200	123184999		1	50851000	50851399		1	97727600	97727799		1	82183000	82183599		1	64116200	64116599		1	118668800	118669199
1	74092400	74092599		2	123188800	123190399		1	50873200	50873399		1	97757200	97757599		1	82267800	82267999		1	64146800	64147199		1	118709800	118710599
1	74138200	74138399		2	123302000	123302399		1	50888200	50888799		1	97790000	97790199		1	82385800	82385999		1	64157000	64157799		1	118713800	118714399
1	74169800	74169999		2	123315000	123315999		1	50906400	50906599		1	97904400	97905199		1	82429800	82429999		1	64213600	64213799		1	118777000	118777399
1	74209600	74209799		2	123596400	123597199		1	50949400	50949599		1	97907000	97907199		1	82472800	82472999		1	64221000	64221399		1	118846200	118846399
1	74267000	74267199		2	123765800	123766599		1	50962200	50962399		1	98141000	98141199		1	82478800	82479599		1	64301200	64301399		1	118911600	118911799
1	74328000	74328399		2	123840000	123840799		1	51020000	51020399		1	98180800	98180999		1	82679400	82679599		1	64338200	64338999		1	118947000	118947199
1	74376200	74376599		2	124196200	124196999		1	51098800	51098999		1	98214000	98214199		1	82684200	82684999		1	64372600	64374399		1	118955400	118955799
1	74380600	74380799		2	124211800	124211999		1	51139400	51140199		1	98248000	98248599		1	82710000	82710199		1	64572000	64572599		1	119052600	119052799
1	74394200	74394399		2	124420600	124421999		1	51304400	51304599		1	98249800	98250399		1	82715400	82715599		1	64704200	64705399		1	119058800	119059199
1	74578200	74579199		2	124482600	124484399		1	51306200	51306399		1	98272000	98272199		1	82737200	82737999		1	64738600	64739799		1	119099800	119099999
1	74622600	74622799		2	125446200	125447999		1	51323800	51324999		1	98275800	98276199		1	82785200	82785599		1	64752000	64752199		1	119126000	119126199
1	74665200	74665599		2	125475200	125475399		1	51375000	51375199		1	98415800	98416199		1	82842000	82842199		1	64847000	64848399		1	119129000	119130199
1	74752000	74752199		2	126223600	126223799		1	51378000	51379199		1	98435600	98435799		1	82920800	82921199		1	64981200	64981799		1	119224400	119224799
1	74839600	74839799		2	126588000	126588199		1	51465000	51465999		1	98443800	98443999		1	82992600	82992799		1	65162000	65162399		1	119236800	119237399
1	74845800	74846399		2	126718400	126719399		1	51501000	51501199		1	98497600	98498999		1	83021200	83021399		1	65205800	65206199		1	119276400	119276999
1	74863600	74863799		2	126845400	126846199		1	51608000	51608599		1	98572600	98572799		1	83179600	83180799		1	65215000	65216599		1	119332600	119332999
1	74898000	74898599		2	127150200	127152599		1	51668000	51668199		1	98574200	98574999		1	83314400	83314799		1	65220800	65221599		1	119353000	119353399
1	74934600	74934999		2	127424200	127424599		1	51673600	51674199		1	98728200	98728999		1	83334800	83335599		1	65263000	65264399		1	119470000	119470399
1	74937000	74937199		2	127686200	127686399		1	51693800	51693999		1	98757200	98757799		1	83355800	83356399		1	65275000	65275799		1	119520200	119520599
1	74983200	74983399		2	127806600	127806799		1	51695200	51695799		1	98807800	98808999		1	83441400	83441799		1	65320000	65320399		1	119715200	119715799
1	75285200	75285399		2	127991200	127991599		1	51747600	51747799		1	98823800	98824199		1	83517200	83517599		1	65368200	65369399		1	119740600	119740999
1	75291600	75291799		2	128202200	128203199		1	51760600	51760999		1	98831200	98831799		1	83539000	83539399		1	65482800	65483999		1	119765800	119766199
1	75331400	75331599		2	128607800	128609199		1	51785000	51785599		1	98908000	98908199		1	83655400	83655799		1	65485800	65485999		1	119846800	119847199
1	75337800	75337999		2	128701200	128701399		1	51800000	51800199		1	98981600	98981799		1	83766000	83766399		1	65579200	65579799		1	119859800	119860199
1	75381400	75381799		2	128721600	128722599		1	51806400	51806599		1	99003600	99003999		1	83922400	83922799		1	65680600	65682599		1	119878400	119878799
1	75398800	75398999		2	128761800	128763399		1	51809200	51809399		1	99090200	99090399		1	84102400	84102999		1	65735400	65736399		1	119880200	119880599
1	75416200	75416399		2	129010800	129012799		1	51871400	51871799		1	99119600	99120399		1	84112400	84112599		1	65759000	65759599		1	119971200	119971799
1	75580400	75580599		2	129341000	129342599		1	51873200	51874399		1	99241200	99241399		1	84509200	84509799		1	65805200	65806199		1	119978600	119979799
1	75593600	75593799		2	129368800	129369399		1	51891400	51891799		1	99306200	99306799		1	84532600	84532999		1	65891600	65891799		1	119991200	119991599
1	75653600	75653799		2	130146000	130146999		1	52001800	52002199		1	99310000	99311399		1	84583400	84583599		1	65915600	65915999		1	120005600	120005999
1	75681800	75681999		2	130632600	130633999		1	52029000	52029199		1	99337000	99337399		1	84709400	84709599		1	65931600	65931799		1	120040200	120040599
1	75741000	75741199		2	130845000	130845799		1	52085800	52086399		1	99392800	99392999		1	84727200	84727399		1	65954000	65955199		1	120066400	120067199
1	75794600	75794799		2	130909600	130910999		1	52116400	52116799		1	99398600	99399999		1	84770400	84770599		1	65959000	65959599		1	120081000	120081399
1	75901000	75901199		2	131279800	131279999		1	52195200	52197599		1	99450200	99450399		1	84845000	84845399		1	66010000	66010599		1	120169400	120169799
1	75948400	75948599		2	131375800	131376799		1	52278800	52278999		1	99453600	99453799		1	84924200	84924399		1	66060400	66061599		1	120193200	120193799
1	75995200	75995599		2	131666800	131667599		1	52323800	52324999		1	99480800	99482199		1	84973800	84974399		1	66065800	66066199		1	120200000	120200399
1	76021200	76021399		2	132058600	132058799		1	52338200	52339599		1	99493200	99494199		1	84993400	84993599		1	66142000	66142799		1	120704200	120704799
1	76038200	76039199		2	132187000	132187799		1	52341000	52341399		1	99499800	99499999		1	85099200	85099399		1	66153200	66154399		1	121011000	121011199
1	76080200	76081599		2	132191800	132191999		1	52355200	52356199		1	99511800	99512399		1	85125800	85125999		1	66315000	66316599		1	121442200	121443399
1	76087600	76087799		2	132507400	132509599		1	52359400	52359599		1	99690200	99690599		1	85154600	85154799		1	66324800	66325399		1	121459800	121460399
1	76133800	76133999		2	132560800	132561199		1	52385800	52386599		1	99762000	99762199		1	85249000	85249199		1	66337400	66338399		1	121478800	121478999
1	76164600	76165199		2	132723800	132724999		1	52407000	52407599		1	99767200	99767599		1	85481400	85482399		1	66356200	66356599		1	121494400	121494599
1	76212600	76213599		2	132733200	132733999		1	52411200	52411399		1	99795400	99795599		1	85498600	85498999		1	66444800	66445999		1	121507000	121507399
1	76228200	76228399		2	133814200	133814399		1	52419600	52420799		1	99799000	99799399		1	85576000	85576799		1	66502800	66503199		1	121660800	121661199
1	76260800	76260999		2	134118800	134119599		1	52582200	52582799		1	99837200	99837399		1	85732000	85732399		1	66588000	66588599		1	121824400	121825599
1	76287800	76287999		2	134543600	134544599		1	52610600	52612399		1	99874600	99874999		1	85745600	85745799		1	66617600	66617999		1	121844800	121845199
1	76291200	76291399		2	134807600	134808399		1	52710000	52710399		1	99941400	99942399		1	85768200	85768399		1	66669600	66670399		1	121854600	121855199
1	76296000	76296199		2	134993400	134993799		1	52725200	52725399		1	99957400	99957599		1	85818800	85818999		1	66743000	66744999		1	121872400	121873599
1	76307800	76307999		2	135077200	135078399		1	52843200	52843399		1	100012400	100012599		1	85826400	85827799		1	66747200	66749199		1	122017000	122017399
1	76333800	76334199		2	135185200	135186599		1	52916400	52916599		1	100066400	100066599		1	85895400	85895599		1	66755000	66756399		1	122350400	122350599
1	76339800	76339999		2	135280000	135280399		1	52961800	52962399		1	100089600	100090999		1	85954000	85954199		1	66761800	66762999		1	122801200	122801799
1	76349400	76349599		2	135296400	135296999		1	52969600	52969799		1	100102400	100102599		1	85969200	85969599		1	66812600	66812999		1	122906200	122906599
1	76408000	76408199		2	135392800	135394399		1	52976400	52976599		1	100113200	100114399		1	85970400	85970599		1	66897000	66897199		1	122999400	122999799
1	76537800	76538199		2	135463200	135465199		1	53041600	53041999		1	100135200	100136199		1	85985600	85985999		1	66935800	66936999		1	123058800	123058999
1	76568600	76568799		2	135478600	135479199		1	53086800	53086999		1	100291200	100291399		1	86001200	86001599		1	66993200	66993599		1	123073400	123073799
1	76723800	76723999		2	135482600	135483599		1	53120000	53121199		1	100293000	100294399		1	86004400	86004599		1	67009400	67009799		1	123272800	123273399
1	76857800	76858199		2	135637800	135638399		1	53143400	53143799		1	100329400	100329799		1	86141400	86141799		1	67029400	67029599		1	123395800	123395999
1	76861400	76861599		2	135682200	135683999		1	53203000	53203199		1	100436400	100437599		1	86167600	86167999		1	67039000	67041599		1	123414800	123415199
1	76917000	76917599		2	135789200	135791399		1	53250600	53250999		1	100440400	100440599		1	86229200	86229399		1	67091600	67091999		1	123479200	123479599
1	77004000	77004199		2	136282200	136282599		1	53377800	53377999		1	100499000	100499399		1	86301400	86301599		1	67164600	67165399		1	123516600	123516999
1	77084200	77084599		2	136534200	136535999		1	53388000	53388199		1	100588400	100590199		1	86305600	86305799		1	67194800	67196199		1	123754400	123755999
1	77162800	77162999		2	136698200	136699399		1	53447400	53447999		1	100794200	100794399		1	86356200	86356399		1	67320000	67320799		1	123787800	123787999
1	77165800	77166199		2	136702800	136702999		1	53474400	53474999		1	100821400	100822399		1	86357400	86357799		1	67342600	67343199		1	123882800	123883999
1	77423800	77423999		2	136799000	136800399		1	53527600	53527799		1	100839200	100839599		1	86423000	86423199		1	67356200	67356999		1	124257800	124260199
1	77431400	77431799		2	136972400	136972599		1	53533400	53533599		1	101082000	101082599		1	86450800	86450999		1	67382000	67383599		1	124321200	124321399
1	77448600	77448799		2	136996400	136997999		1	53589400	53589999		1	101094800	101094999		1	86485200	86486199		1	67392200	67392399		1	124335200	124335799
1	77523200	77523399		2	137218000	137218399		1	53610600	53610799		1	101166000	101167199		1	86503000	86503199		1	67443600	67444799		1	124352600	124353799
1	77597600	77598599		2	137252000	137253799		1	53613200	53613399		1	101236000	101236999		1	86507400	86507799		1	67457000	67458199		1	124419000	124419399
1	77662600	77662799		2	137884200	137884399		1	53663400	53663599		1	101252000	101253399		1	86525000	86525199		1	67474000	67475399		1	124640800	124641199
1	77675400	77676199		2	138020600	138024399		1	53665000	53665199		1	101325400	101326199		1	86526600	86526999		1	67482800	67482999		1	124726200	124726599
1	77759400	77760199		2	138079800	138081399		1	53803000	53803199		1	101327600	101327799		1	86536800	86537599		1	67516000	67516999		1	124733600	124733799
1	77799200	77799399		2	138547400	138547599		1	53865000	53865399		1	101370000	101370799		1	86659800	86660799		1	67643600	67644599		1	124800200	124800399
1	77824800	77824999		2	138639800	138640399		1	53876800	53877199		1	101414600	101414799		1	86819600	86819799		1	67697800	67697999		1	124866000	124866599
1	77875800	77876199		2	138687000	138688799		1	53890400	53890799		1	101430800	101430999		1	86857400	86857999		1	67700800	67702399		1	124921600	124921999
1	77968600	77968999		2	139303000	139305199		1	53912200	53912399		1	101436200	101436599		1	86983200	86983599		1	67704600	67704999		1	124938800	124939999
1	77975200	77975399		2	139673600	139674799		1	53934600	53934799		1	101443800	101444799		1	86995800	86996199		1	67725000	67725999		1	125022000	125022799
1	77985600	77985799		2	139837800	139838799		1	54009600	54010399		1	101458200	101458399		1	87062400	87062999		1	67773000	67773199		1	125024800	125024999
1	78054400	78054599		2	139862800	139863999		1	54071200	54071799		1	101478800	101479799		1	87094400	87094599		1	67781600	67782199		1	125048200	125048799
1	78056600	78056999		2	140012000	140012999		1	54077600	54077799		1	101502800	101502999		1	87096400	87097999		1	67849400	67849799		1	125075400	125075799
1	78096400	78096599		2	140024400	140024599		1	54116800	54117799		1	101522800	101523399		1	87104200	87104599		1	67890600	67890999		1	125079400	125079799
1	78139200	78139399		2	140092600	140093399		1	54192800	54193199		1	101572800	101574199		1	87126800	87126999		1	67896000	67896599		1	125179800	125180199
1	78297400	78297599		2	140536000	140537199		1	54207600	54207799		1	101579400	101579799		1	87155800	87155999		1	67932000	67932999		1	125183200	125183799
1	78357000	78357199		2	140699000	140699999		1	54402600	54403599		1	101684000	101685199		1	87259000	87259199		1	67947400	67948799		1	125333400	125334199
1	78430400	78430599		2	140903400	140906399		1	54428800	54428999		1	101710400	101710799		1	87261800	87262599		1	67970000	67971199		1	125469200	125469599
1	78479000	78479199		2	140947600	140947799		1	54474200	54474399		1	101753000	101753199		1	87264600	87264799		1	67999200	67999399		1	125531200	125531999
1	78482600	78482799		2	141149000	141150599		1	54570000	54570199		1	101789400	101790399		1	87388200	87388399		1	68067400	68068799		1	125588200	125588799
1	78505800	78505999		2	141232200	141232999		1	54580200	54581199		1	101824000	101824399		1	87412200	87412599		1	68111200	68111599		1	125596200	125596399
1	78530600	78530999		2	141366800	141366999		1	54675000	54675199		1	101869200	101869799		1	87450800	87451199		1	68135600	68136799		1	125715400	125716199
1	78550400	78550999		2	141407800	141408999		1	54744800	54744999		1	101904800	101905999		1	87457800	87457999		1	68194800	68195199		1	125902000	125902199
1	78552600	78552799		2	141729400	141730999		1	54749400	54749999		1	102024400	102024599		1	87544000	87544199		1	68196400	68197399		1	125937600	125938199
1	78590600	78590799		2	142043600	142043999		1	54856800	54856999		1	102077600	102077799		1	87578600	87578999		1	68249600	68251199		1	125957000	125957599
1	78621600	78621799		2	142344800	142346599		1	54889000	54889199		1	102133000	102133199		1	87636200	87636599		1	68308000	68308399		1	126023200	126023399
1	78691000	78691599		2	142900200	142900399		1	54935400	54935599		1	102204800	102205199		1	87665400	87665599		1	68369600	68370999		1	126130000	126130199
1	78694800	78694999		2	142991600	142992199		1	54963400	54964199		1	102321400	102321599		1	87766600	87766799		1	68416600	68417399		1	126135800	126136399
1	78845400	78845599		2	143101400	143102599		1	54968800	54968999		1	102382800	102383399		1	87769400	87770399		1	68467400	68468599		1	126214200	126214599
1	78881200	78881399		2	143230600	143230799		1	55006600	55007799		1	102472400	102472599		1	87808600	87809199		1	68510400	68510799		1	126265200	126265799
1	79219800	79220399		2	143552000	143552999		1	55063600	55063799		1	102511800	102512599		1	87966200	87966799		1	68618400	68619199		1	126297400	126297999
1	79225400	79225599		2	144383000	144383799		1	55071000	55072799		1	102515000	102515599		1	88052800	88053199		1	68710000	68711999		1	126366800	126366999
1	79361600	79361799		2	144653800	144655399		1	55079000	55079799		1	102530800	102531399		1	88109600	88109999		1	68713800	68714599		1	126413800	126414199
1	79613000	79613199		2	145866200	145866399		1	55088600	55089199		1	102582200	102582599		1	88110800	88111799		1	68731000	68732399		1	126526000	126526599
1	79628400	79628599		2	146060000	146060199		1	55094200	55094999		1	102663600	102664199		1	88125400	88126399		1	68754800	68756799		1	126547000	126547199
1	79655400	79655599		2	146173200	146173599		1	55134200	55134399		1	102852400	102853399		1	88188800	88188999		1	68805400	68806799		1	126564800	126564999
1	79658600	79658799		2	146758800	146759399		1	55170400	55170599		1	102937000	102937199		1	88212400	88212599		1	68834200	68834799		1	126653600	126653999
1	79751600	79751999		2	146878000	146878599		1	55186800	55186999		1	102953600	102953799		1	88216000	88216999		1	68876200	68876799		1	126659000	126659199
1	79872200	79872599		2	147369400	147369599		1	55190600	55190999		1	103057800	103058999		1	88222000	88222199		1	68881400	68881999		1	126684000	126684399
1	79890000	79890199		2	148110200	148110599		1	55248200	55248799		1	103160000	103160599		1	88230600	88231199		1	68946800	68947399		1	126750200	126750399
1	80063800	80063999		2	148174800	148175199		1	55268200	55269399		1	103234800	103234999		1	88237200	88237399		1	68958600	68958999		1	126827800	126828199
1	80081000	80081399		2	148366000	148366199		1	55282600	55282799		1	103261000	103261599		1	88243800	88243999		1	69028600	69030599		1	126907600	126908199
1	80098200	80098399		2	148446200	148447599		1	55369000	55369599		1	103272000	103272199		1	88245800	88245999		1	69036400	69037199		1	127005400	127005599
1	80230200	80230599		2	148895600	148896999		1	55398400	55398599		1	103340600	103340799		1	88253200	88253999		1	69062000	69062599		1	127023400	127023999
1	80239000	80239199		2	149169800	149169999		1	55441400	55441599		1	103351400	103351799		1	88256600	88256799		1	69097000	69097599		1	127035400	127035799
1	80254400	80254599		2	149384400	149385999		1	55495400	55495799		1	103363000	103363599		1	88257600	88257799		1	69136200	69138599		1	127044400	127045599
1	80315600	80315799		2	149905400	149905599		1	55504600	55504999		1	103397000	103397799		1	88261800	88261999		1	69215600	69217599		1	127300600	127301799
1	80435400	80435599		2	150635400	150636599		1	55555600	55555799		1	103431000	103431399		1	88274000	88274999		1	69226200	69227199		1	127430000	127430799
1	80510400	80510599		2	151585400	151585799		1	55601000	55601199		1	103454400	103455399		1	88277800	88278599		1	69408200	69408799		1	127432200	127433799
1	80532600	80532799		2	151666200	151667399		1	55675200	55675399		1	103469600	103469799		1	88280600	88280799		1	69439000	69439799		1	127448200	127448399
1	80553400	80553799		2	152430200	152431199		1	55692800	55693199		1	103500400	103500599		1	88283400	88283599		1	69460000	69460999		1	127526600	127526999
1	80647600	80648599		2	152435600	152435799		1	55806800	55806999		1	103597400	103598399		1	88295200	88295399		1	69494600	69495399		1	127549600	127550199
1	80717200	80717599		2	153096600	153100399		1	55830200	55830399		1	103613200	103613799		1	88301200	88301399		1	69574400	69575399		1	127738000	127738199
1	80736600	80737199		2	153304400	153305399		1	55898600	55898799		1	103624000	103624799		1	88316200	88316399		1	69587800	69587999		1	127839800	127840199
1	80785600	80785799		2	153772000	153772199		1	55905000	55905199		1	103676400	103676599		1	88323000	88323399		1	69600800	69601399		1	127928800	127928999
1	80917200	80917399		2	153782200	153782399		1	55938200	55939599		1	103725400	103725599		1	88441600	88441799		1	69751800	69752599		1	127959600	127959999
1	80931000	80931999		2	153808800	153808999		1	56001200	56001599		1	103727600	103728999		1	88477800	88478199		1	69804000	69805199		1	128039000	128039199
1	81037600	81037999		2	153857200	153857399		1	56007800	56008199		1	103781200	103781799		1	88539400	88539599		1	69811600	69812399		1	128069600	128070599
1	81074000	81074199		2	154289800	154289999		1	56018600	56018799		1	103907800	103907999		1	88577600	88577999		1	69869400	69871399		1	128411800	128412399
1	81124800	81124999		2	154439800	154441199		1	56024200	56025799		1	103990000	103990199		1	88587600	88588399		1	69925800	69926999		1	128454600	128455199
1	81162800	81162999		2	154589400	154589599		1	56052800	56053199		1	104043400	104044399		1	88595400	88596399		1	69980600	69981199		1	128494600	128494799
1	81170600	81170999		2	154802000	154803799		1	56062000	56062199		1	104203400	104203999		1	88694400	88694599		1	70007600	70008999		1	128722600	128722799
1	81239800	81239999		2	155019200	155019799		1	56065800	56065999		1	104320000	104320999		1	88700000	88700199		1	70026000	70026599		1	128750600	128751399
1	81261400	81262199		2	155597800	155598599		1	56073800	56074999		1	104378200	104379799		1	88708400	88708999		1	70063000	70063399		1	128811600	128811799
1	81295800	81295999		2	156150000	156150999		1	56083400	56083799		1	104396600	104397399		1	88783200	88783599		1	70076200	70076999		1	128920400	128921599
1	81321000	81321199		2	156183600	156183999		1	56088600	56089199		1	104411000	104411199		1	88888000	88888399		1	70104800	70106199		1	128949000	128949399
1	81338200	81338399		2	156797000	156798799		1	56165000	56165799		1	104420400	104421999		1	88924200	88924399		1	70154400	70154799		1	128956200	128956599
1	81357200	81358199		2	156944600	156945799		1	56188000	56188199		1	104476200	104476399		1	88942000	88942199		1	70156400	70156799		1	129032000	129032599
1	81399600	81399799		2	157149200	157149399		1	56191600	56191999		1	104534200	104535199		1	88996000	88996199		1	70180600	70180999		1	129108600	129108799
1	81517400	81518799		2	157472600	157472799		1	56218800	56219199		1	104618600	104618799		1	89006400	89006599		1	70205000	70205599		1	129111000	129111399
1	81524600	81524799		2	157568000	157568199		1	56262800	56263799		1	104653600	104653799		1	89056000	89056199		1	70262400	70263399		1	129205600	129205999
1	81582400	81582599		2	157652000	157652399		1	56284000	56284199		1	104752200	104752399		1	89070000	89070399		1	70347000	70347199		1	129252600	129252999
1	81596400	81596599		2	158079200	158079599		1	56309200	56309399		1	104821000	104821199		1	89076000	89076199		1	70361600	70363399		1	129366600	129366799
1	81623000	81623199		2	158272200	158272599		1	56355000	56355199		1	104831800	104832999		1	89117400	89117599		1	70403600	70404399		1	129408600	129409199
1	81710200	81711599		2	158438800	158439199		1	56415400	56415599		1	104849400	104851599		1	89143800	89143999		1	70493600	70495199		1	129503800	129504199
1	81756200	81756599		2	159062600	159063399		1	56431800	56432199		1	104853400	104854399		1	89145400	89145799		1	70521200	70522999		1	129758600	129759199
1	81903400	81903799		2	159169600	159170599		1	56434200	56434399		1	105081000	105081799		1	89187200	89187399		1	70533600	70534199		1	129837400	129837599
1	81949600	81949799		2	159174800	159174999		1	56473400	56474199		1	105121800	105122799		1	89215200	89215399		1	70574000	70574399		1	130097200	130097799
1	81965200	81965399		2	160024800	160025999		1	56488400	56489599		1	105252400	105252599		1	89329400	89329999		1	70577200	70578599		1	130184000	130184599
1	81971400	81971599		2	160134000	160135199		1	56510600	56510799		1	105274000	105275199		1	89372400	89372799		1	70622400	70623199		1	130619800	130620599
1	82014400	82014599		2	160385000	160385199		1	56512000	56512799		1	105346400	105346599		1	89385200	89385399		1	70653000	70653599		1	130773000	130773199
1	82084200	82084599		2	161057400	161057799		1	56515800	56516399		1	105480600	105480799		1	89400800	89401199		1	70771800	70772199		1	130842400	130842799
1	82140600	82140799		2	161221600	161222199		1	56532200	56533199		1	105557800	105558599		1	89459200	89459399		1	70794200	70794599		1	130857400	130857799
1	82282200	82283199		2	161865800	161867199		1	56557800	56557999		1	105672200	105672799		1	89473800	89473999		1	70834400	70836199		1	130871600	130871799
1	82296200	82296599		2	162671200	162672199		1	56559000	56559199		1	105685600	105685799		1	89483000	89483199		1	70883000	70883199		1	130975600	130975799
1	82310000	82310199		2	162721200	162722199		1	56569600	56569799		1	105716800	105716999		1	89516600	89516999		1	71024200	71024399		1	130984400	130984799
1	82340000	82340199		2	163109200	163109399		1	56600200	56600799		1	105739800	105740199		1	89613200	89613399		1	71044200	71045399		1	131010800	131010999
1	82371400	82371599		2	163577600	163577999		1	56621600	56621999		1	105797200	105798199		1	89622200	89622399		1	71159400	71160399		1	131047400	131049799
1	82562200	82562999		2	163713400	163714399		1	56636000	56636999		1	105913800	105914199		1	89648800	89648999		1	71311000	71312199		1	131050800	131051199
1	82664800	82664999		2	164626800	164626999		1	56648600	56648799		1	105982200	105982599		1	89663400	89663599		1	71314200	71315599		1	131102000	131102599
1	82758000	82758199		2	165030800	165031399		1	56655600	56656199		1	106238600	106238799		1	89696800	89696999		1	71414200	71414599		1	131123400	131124599
1	82856200	82856399		2	165257000	165257199		1	56658800	56658999		1	106279800	106281399		1	89724600	89724999		1	71461200	71461399		1	131126000	131126199
1	82911000	82911199		2	165642800	165643999		1	56668400	56668799		1	106448600	106448799		1	89732200	89732399		1	71625400	71625799		1	131132400	131132799
1	82941200	82941399		2	166271600	166271999		1	56677000	56678599		1	106646400	106647399		1	89742200	89742999		1	71662400	71662999		1	131194800	131194999
1	82961400	82961799		2	166331400	166331599		1	56697200	56697399		1	106723200	106723399		1	89756600	89756799		1	71711800	71712999		1	131204200	131204399
1	83012000	83012199		2	166686000	166686199		1	56752600	56753999		1	106820200	106820399		1	89762800	89762999		1	71715000	71715199		1	131257000	131258199
1	83063600	83063999		2	166948800	166949799		1	56764400	56764599		1	106918600	106919799		1	89775400	89775599		1	71774800	71776999		1	131260000	131261599
1	83158200	83158399		2	167864000	167864399		1	56796200	56796799		1	106934000	106934599		1	89786800	89787399		1	71853800	71854399		1	131286000	131286199
1	83194600	83194799		2	167999400	167999599		1	56816400	56816799		1	107150000	107150199		1	89829200	89829399		1	71913000	71913399		1	131367800	131368199
1	83217000	83217199		2	168263600	168263799		1	56828600	56828999		1	107280400	107280599		1	89831600	89831999		1	71923000	71923199		1	131441800	131443599
1	83261200	83261399		2	168307200	168307599		1	56859600	56859999		1	107358400	107358599		1	89851600	89851999		1	72009600	72010599		1	131486400	131486799
1	83280600	83280799		2	168753200	168753999		1	56872400	56873599		1	107408200	107409799		1	89859000	89859399		1	72037800	72038399		1	131605000	131606399
1	83281800	83281999		2	168838800	168839199		1	56876000	56876199		1	107424800	107425599		1	89860800	89860999		1	72105200	72107599		1	131612400	131613399
1	83312400	83312599		2	169033400	169033799		1	56884400	56885399		1	107436600	107436799		1	89880200	89881199		1	72150600	72150799		1	131660200	131660999
1	83336400	83336799		2	169808200	169808799		1	56929800	56930199		1	107600400	107600599		1	89887600	89888199		1	72165000	72166199		1	131725600	131725799
1	83393800	83393999		2	170543600	170544199		1	57020600	57021399		1	107610800	107611599		1	89918000	89918199		1	72178800	72179599		1	131751600	131752199
1	83588800	83588999		2	170924800	170925599		1	57029200	57029599		1	107678800	107678999		1	89923200	89924199		1	72237600	72238199		1	131883000	131883599
1	83596800	83596999		2	171735000	171735799		1	57072200	57073199		1	107848800	107848999		1	89958800	89959999		1	72319000	72319399		1	132009800	132009999
1	83606600	83606799		2	171772000	171772199		1	57122000	57122799		1	107869800	107870799		1	89983800	89984999		1	72391800	72392599		1	132140600	132141199
1	83628800	83628999		2	172394000	172394599		1	57188800	57188999		1	107908800	107908999		1	89994400	89995399		1	72402800	72402999		1	132173400	132174799
1	83645400	83645599		2	172431600	172431999		1	57199400	57200199		1	107995000	107995199		1	90062400	90062799		1	72444000	72444799		1	132279200	132279599
1	83662400	83662599		2	172954600	172954799		1	57214800	57215799		1	108013400	108014399		1	90079800	90079999		1	72473800	72475599		1	132302000	132304199
1	83667400	83667599		2	174171400	174173199		1	57219600	57220999		1	108028800	108028999		1	90111400	90112199		1	72497000	72497199		1	132364800	132366599
1	83683800	83684199		2	174220200	174222399		1	57237200	57237599		1	108044400	108044999		1	90115000	90115199		1	72554400	72555199		1	132466200	132466599
1	83829000	83829199		2	174301600	174301799		1	57242800	57243399		1	108052800	108052999		1	90140200	90140599		1	72624200	72624599		1	132520000	132520999
1	83870000	83870199		2	174952200	174952999		1	57260600	57260999		1	108069400	108070199		1	90161400	90161599		1	72696400	72696599		1	132522800	132523599
1	83879200	83879399		2	177299000	177299199		1	57297600	57297799		1	108097800	108098999		1	90191400	90191599		1	72730800	72732199		1	132561400	132561999
1	83949800	83949999		2	177505400	177505599		1	57311800	57311999		1	108199400	108199799		1	90195000	90195399		1	72776800	72777199		1	132567000	132567399
1	84100000	84100199		2	178393600	178393999		1	57373000	57373399		1	108228600	108228799		1	90260000	90260399		1	72803000	72803399		1	132591800	132593199
1	84279000	84279199		2	179133800	179133999		1	57430200	57430599		1	108267200	108267599		1	90287600	90288999		1	72824400	72824599		1	132617200	132617599
1	84348200	84348399		2	179525800	179526199		1	57529000	57529399		1	108273400	108274199		1	90319800	90320199		1	72877400	72877999		1	132702400	132702799
1	84350400	84350599		2	180197000	180197199		1	57531800	57531999		1	108389000	108389199		1	90368200	90368399		1	72894600	72894799		1	132789800	132791199
1	84360000	84360199		2	180963800	180964999		1	57631200	57631599		1	108391200	108392399		1	90412800	90412999		1	73079000	73079399		1	132825800	132826599
1	84387400	84387599		2	181081600	181082599		1	57686800	57687999		1	108447800	108447999		1	90472800	90472999		1	73137800	73139399		1	132855600	132856199
1	84433200	84433799		2	181223800	181224599		1	57698000	57698199		1	108469800	108470799		1	90500000	90500599		1	73220000	73220799		1	132907400	132907599
1	84434600	84435599		2	181816600	181817599		1	57743000	57743199		1	108472400	108475399		1	90546400	90546599		1	73239200	73240399		1	132954800	132955399
1	84440000	84440199		2	181917200	181919199		1	57754200	57754999		1	108480200	108480399		1	90701400	90701799		1	73257000	73257999		1	132957400	132957599
1	84492600	84492799		3	3828200	3830799		1	57791200	57791399		1	108510200	108512399		1	90916000	90916399		1	73302000	73302399		1	133058000	133058599
1	84507400	84507599		3	4057200	4059199		1	57792200	57792599		1	108538800	108539999		1	90973200	90973599		1	73365200	73365399		1	133096000	133097199
1	84517800	84517999		3	4435000	4436999		1	57795600	57796599		1	108566400	108567199		1	91040200	91040599		1	73378000	73378199		1	133178600	133179199
1	84730200	84730399		3	4535200	4535599		1	57810600	57813199		1	108596800	108597199		1	91057800	91058399		1	73382400	73382599		1	133181000	133181599
1	84736400	84736599		3	4685800	4685999		1	57902800	57903199		1	108605000	108605399		1	91074600	91074799		1	73386000	73386799		1	133235000	133235599
1	84751600	84751799		3	4858200	4858399		1	58099000	58099399		1	108610000	108610199		1	91123600	91124399		1	73392000	73392999		1	133268800	133269199
1	84773200	84773399		3	5183800	5184199		1	58104600	58104799		1	108636400	108636799		1	91148000	91148199		1	73448800	73449799		1	133373400	133373999
1	84800200	84800399		3	5331800	5332999		1	58136000	58136999		1	108665800	108665999		1	91175000	91175199		1	73458600	73459599		1	133378600	133379799
1	84826200	84826399		3	5540200	5541399		1	58145000	58145599		1	108673400	108673599		1	91201200	91201399		1	73478600	73479199		1	133380600	133380999
1	84850200	84850399		3	5543000	5544399		1	58158400	58159199		1	108716200	108716799		1	91334600	91334799		1	73484600	73485199		1	133409800	133410199
1	84939200	84939399		3	5869600	5870599		1	58195800	58196199		1	108731600	108732199		1	91337600	91337999		1	73597000	73597399		1	133414400	133415599
1	84994800	84994999		3	6962800	6963999		1	58249000	58249199		1	108739600	108739999		1	91340800	91341399		1	73598800	73599199		1	133434800	133434999
1	85030200	85030399		3	7231800	7232599		1	58272600	58272799		1	108768000	108769199		1	91358400	91358599		1	73608600	73609399		1	133441400	133441799
1	85068800	85068999		3	7477200	7477599		1	58338000	58338199		1	108887000	108887399		1	91397800	91397999		1	73629800	73630999		1	133445800	133446199
1	85104400	85104599		3	8456200	8457399		1	58344600	58344799		1	108889800	108890199		1	91399000	91399599		1	73656600	73657199		1	133585600	133585799
1	85117200	85117399		3	8977000	8977199		1	58386400	58386599		1	108904600	108904799		1	91418000	91418399		1	73663200	73664599		1	133586600	133586799
1	85192800	85192999		3	9185400	9186199		1	58407800	58407999		1	108950200	108950399		1	91429200	91430199		1	73743400	73743599		1	133594400	133595999
1	85247400	85247599		3	9508400	9508999		1	58420400	58422199		1	109014800	109015599		1	91480000	91480199		1	73758400	73758999		1	133654400	133655599
1	85264000	85264199		3	9559600	9559799		1	58463000	58463999		1	109016800	109017799		1	91501400	91502199		1	73760800	73761199		1	133895400	133896599
1	85501400	85501599		3	9561000	9561199		1	58584800	58584999		1	109099400	109100399		1	91540800	91541399		1	73796800	73797999		1	133904800	133905999
1	85571600	85572199		3	9658400	9658599		1	58635200	58636199		1	109145800	109146799		1	91552000	91552399		1	73799000	73799399		1	133962800	133963599
1	85651400	85651799		3	10144000	10145599		1	58639200	58639599		1	109173400	109173599		1	91575000	91575199		1	73926200	73926799		1	133993400	133994199
1	85672000	85672199		3	10337400	10337599		1	58700200	58700399		1	109185000	109185799		1	91600600	91600799		1	73930000	73930199		1	134090400	134090799
1	85678600	85678999		3	10341600	10341799		1	58740000	58740199		1	109189000	109189999		1	91639600	91639799		1	73947400	73947799		1	134103600	134104199
1	85761400	85761599		3	10360000	10362399		1	58894600	58895799		1	109449800	109450999		1	91827400	91827999		1	73958600	73958999		1	134219600	134220999
1	85822200	85822399		3	10749000	10749799		1	58917200	58917399		1	109486800	109486999		1	91830200	91830399		1	73988800	73989799		1	134238600	134238999
1	86070400	86070599		3	10779800	10781199		1	59017600	59018999		1	109509400	109511199		1	91895400	91895599		1	74143600	74144599		1	134251000	134251799
1	86083600	86083799		3	10824600	10824799		1	59072000	59072199		1	109637800	109637999		1	91900000	91900199		1	74160400	74160799		1	134255400	134255799
1	86097400	86097599		3	11252200	11252999		1	59092200	59092599		1	109677600	109677999		1	91938400	91938599		1	74190400	74190999		1	134303600	134303799
1	86107800	86107999		3	11414600	11415199		1	59175400	59176199		1	109690200	109690399		1	91978200	91978399		1	74202400	74202799		1	134309800	134309999
1	86161000	86161199		3	12026000	12026399		1	59231200	59231599		1	109696600	109697599		1	91982400	91982599		1	74245400	74245799		1	134313000	134313599
1	86184600	86184799		3	12065000	12065599		1	59286800	59287199		1	109800200	109801399		1	91992200	91992399		1	74312200	74312999		1	134391400	134391799
1	86219800	86219999		3	12096600	12097599		1	59353800	59354399		1	109858800	109858999		1	91999200	91999399		1	74369400	74370599		1	134406000	134406399
1	86248800	86248999		3	12212400	12212799		1	59417200	59418599		1	109961800	109962199		1	92009400	92010199		1	74475400	74475599		1	134416000	134416399
1	86256800	86256999		3	12275200	12275599		1	59469200	59469599		1	109981200	109981399		1	92044200	92045599		1	74495200	74496799		1	134534200	134534799
1	86337200	86337399		3	12322600	12322999		1	59498400	59498799		1	109999800	109999999		1	92047600	92047799		1	74582000	74583999		1	134574800	134575199
1	86393400	86393599		3	12383600	12383799		1	59532800	59532999		1	110050000	110050799		1	92075200	92075399		1	74587000	74587599		1	134680200	134680799
1	86407600	86407999		3	12464200	12465199		1	59534800	59535999		1	110114400	110114599		1	92101800	92101999		1	74692800	74693199		1	134692200	134692799
1	86471200	86471599		3	12718800	12719599		1	59599000	59599399		1	110138800	110140199		1	92171000	92171199		1	74732200	74732599		1	134723400	134723799
1	86517400	86517599		3	12953400	12953599		1	59602000	59602199		1	110146800	110147599		1	92212000	92212399		1	74736000	74736199		1	134737600	134737999
1	86602000	86602199		3	13156600	13156799		1	59649200	59649799		1	110157200	110157799		1	92232200	92233199		1	74756200	74756399		1	134778400	134778999
1	86628000	86628399		3	13177600	13179599		1	59660400	59661199		1	110254200	110254399		1	92252600	92253199		1	74791400	74791799		1	134838200	134838599
1	86645000	86645199		3	13566400	13566599		1	59663600	59663999		1	110295400	110295599		1	92268400	92268599		1	74818200	74819199		1	134841600	134841799
1	86701400	86702399		3	13787000	13787799		1	59669400	59669799		1	110402600	110402799		1	92285000	92285199		1	74976600	74977599		1	134864000	134864599
1	86716600	86716999		3	13859200	13860599		1	59803200	59803599		1	110423800	110423999		1	92385000	92386199		1	74982600	74984399		1	134977800	134978799
1	86722600	86723199		3	14217800	14218799		1	59860400	59860599		1	110440600	110440999		1	92404200	92404399		1	74993400	74993999		1	135002600	135002799
1	86977200	86977399		3	14227000	14227599		1	59861600	59861999		1	110444400	110444999		1	92410400	92410599		1	75006800	75007399		1	135020400	135020599
1	87089400	87089599		3	14585400	14586199		1	59900000	59900799		1	110445800	110445999		1	92512200	92512999		1	75008400	75009799		1	135049000	135049199
1	87150000	87150199		3	14846600	14846799		1	59912200	59912399		1	110462600	110465799		1	92516400	92516599		1	75197400	75198199		1	135116400	135116599
1	87165800	87165999		3	15063000	15063799		1	60026000	60026199		1	110482800	110483199		1	92521200	92521999		1	75219200	75219399		1	135197400	135198599
1	87233400	87233999		3	15456200	15459599		1	60087000	60087199		1	110508600	110509199		1	92586200	92586399		1	75250600	75250999		1	135230600	135230999
1	87260200	87260399		3	15461000	15461399		1	60127400	60127799		1	110556000	110556199		1	92593000	92593199		1	75274800	75275399		1	135248200	135249999
1	87272600	87272999		3	15516000	15516799		1	60199400	60200799		1	110572800	110574599		1	92617800	92617999		1	75285000	75285399		1	135258000	135258199
1	87301800	87301999		3	16074200	16074399		1	60222600	60222999		1	110577200	110577399		1	92655200	92655599		1	75314400	75314599		1	135260200	135260799
1	87304600	87304799		3	16414400	16415999		1	60246200	60246399		1	110657600	110657799		1	92662600	92662999		1	75322000	75324599		1	135311400	135312399
1	87329200	87329399		3	16594200	16595799		1	60249000	60249799		1	110714800	110714999		1	92713000	92713399		1	75343800	75344199		1	135319200	135319599
1	87331400	87331599		3	16821400	16822399		1	60288600	60289199		1	110728000	110728199		1	92773800	92773999		1	75420400	75421999		1	135374000	135374599
1	87413600	87413799		3	17007000	17007399		1	60295200	60295599		1	110739000	110739399		1	92835200	92835399		1	75445200	75446399		1	135390200	135390799
1	87536800	87537799		3	17201600	17202799		1	60371800	60372199		1	110804800	110804999		1	92849000	92849399		1	75575000	75577799		1	135405800	135405999
1	87587800	87587999		3	17273200	17274999		1	60390600	60390999		1	110814600	110814799		1	92861400	92861799		1	75638200	75638399		1	135408200	135408999
1	87704400	87704599		3	17452200	17452599		1	60401400	60401599		1	110837600	110839199		1	92883000	92883199		1	75667200	75668399		1	135533400	135534199
1	87777400	87777599		3	17496200	17497199		1	60430200	60430799		1	110873400	110874399		1	92958800	92959799		1	75705800	75705999		1	135576000	135576399
1	87907800	87907999		3	17541000	17541599		1	60459600	60461999		1	110881000	110881999		1	92974000	92974599		1	75716000	75716999		1	135639600	135639799
1	87939600	87939999		3	17545400	17547799		1	60485000	60485799		1	110968000	110969599		1	93022800	93023199		1	75727200	75727799		1	135722000	135722399
1	87991600	87991799		3	17782400	17783999		1	60509800	60509999		1	111021600	111021799		1	93041600	93041799		1	75846600	75846799		1	135776800	135777199
1	88056200	88056399		3	17939800	17941199		1	60557800	60557999		1	111084000	111084199		1	93048600	93048799		1	75880800	75881399		1	135790600	135791599
1	88128200	88128399		3	17973200	17973399		1	60568600	60568999		1	111113000	111113799		1	93053400	93054599		1	75893600	75894999		1	135818200	135818599
1	88139800	88139999		3	18042000	18043799		1	60634600	60634799		1	111184800	111184999		1	93065400	93065599		1	75945000	75945399		1	135819400	135820399
1	88188800	88188999		3	18103800	18104399		1	60664400	60664799		1	111243600	111244199		1	93138000	93138199		1	75974200	75974799		1	135830000	135830599
1	88216800	88217799		3	18206400	18206999		1	60743800	60743999		1	111264600	111265199		1	93155000	93155199		1	76018000	76018599		1	135849800	135849999
1	88220000	88220799		3	18290800	18290999		1	60753000	60753399		1	111272200	111273399		1	93170200	93170399		1	76023000	76023599		1	135953200	135954199
1	88222000	88222199		3	18340400	18341999		1	60760000	60760199		1	111280400	111281599		1	93175200	93175799		1	76085400	76086999		1	136070600	136070999
1	88236200	88237199		3	18693600	18694199		1	60793800	60794599		1	111312200	111312399		1	93190600	93191599		1	76113400	76116199		1	136125000	136126399
1	88242400	88243799		3	19325800	19326599		1	60815200	60815799		1	111353600	111354199		1	93221600	93222399		1	76164200	76165799		1	136226400	136226999
1	88256000	88256399		3	19361200	19361399		1	60845000	60846199		1	111377400	111377799		1	93233600	93233999		1	76171600	76172999		1	136247400	136247999
1	88257200	88257399		3	19379600	19380399		1	60851000	60851999		1	111378600	111379399		1	93256400	93256999		1	76259800	76259999		1	136419800	136419999
1	88277800	88278999		3	19444200	19444599		1	60864800	60864999		1	111386600	111387199		1	93262200	93262599		1	76341600	76342599		1	136484000	136484399
1	88297800	88297999		3	19544800	19546199		1	60963600	60963799		1	111435200	111435399		1	93332600	93333199		1	76418000	76420599		1	136556400	136557599
1	88302600	88303799		3	19958600	19959599		1	61021600	61022999		1	111484600	111485599		1	93382200	93382399		1	76467200	76468599		1	136561000	136561399
1	88305800	88306799		3	19979600	19980799		1	61107400	61108399		1	111542400	111543599		1	93384200	93384799		1	76490800	76490999		1	136584000	136584399
1	88417200	88417399		3	20227600	20230199		1	61119000	61119399		1	111602200	111602599		1	93407400	93407799		1	76525600	76525999		1	136629200	136630999
1	88428600	88428799		3	20578400	20579599		1	61237400	61237599		1	111606200	111606599		1	93416400	93416599		1	76543400	76543599		1	136741600	136742199
1	88436600	88436799		3	20771200	20771399		1	61249800	61250399		1	111615800	111615999		1	93437600	93438199		1	76608000	76608399		1	136754000	136754399
1	88499000	88499199		3	20826000	20827999		1	61257400	61257999		1	111624200	111625199		1	93449400	93449599		1	76625400	76626799		1	136823600	136824199
1	88511800	88511999		3	20927800	20928799		1	61271800	61272199		1	111642600	111642999		1	93508000	93508999		1	76654000	76655799		1	136835000	136836399
1	88531200	88531399		3	21126000	21126199		1	61325600	61325999		1	111659600	111660399		1	93583400	93583599		1	76704000	76705799		1	136897000	136897799
1	88581800	88581999		3	21275200	21277999		1	61328600	61328999		1	111698800	111698999		1	93587800	93588399		1	76792400	76793399		1	136981200	136981399
1	88641400	88642399		3	21481200	21481999		1	61378400	61379399		1	111747800	111747999		1	93673600	93673799		1	76815200	76816599		1	137088400	137088999
1	88712400	88712999		3	21952600	21953999		1	61389600	61391399		1	111839400	111839599		1	93689000	93689399		1	76876000	76877199		1	137131000	137131599
1	88807800	88807999		3	22422000	22422199		1	61411600	61411999		1	111845400	111845799		1	93717000	93717199		1	76903000	76903399		1	137137800	137139199
1	88855000	88855199		3	22765200	22766599		1	61433800	61433999		1	111854400	111854599		1	93740800	93740999		1	76921000	76921399		1	137305600	137305799
1	88941800	88942999		3	23146200	23146799		1	61465000	61465199		1	111927200	111927999		1	93767000	93767199		1	76934000	76934399		1	137467800	137468599
1	89003800	89003999		3	23581200	23581399		1	61475400	61475599		1	111939800	111939999		1	93778400	93778799		1	76940600	76941399		1	137857800	137858399
1	89020800	89020999		3	23779600	23780599		1	61476400	61476599		1	111969400	111970199		1	93814400	93814999		1	76988800	76989399		1	137884000	137884799
1	89038800	89038999		3	23796400	23796599		1	61479200	61479399		1	111989200	111990199		1	93829000	93829599		1	76990400	76991799		1	137900400	137900799
1	89046200	89046399		3	23816800	23817199		1	61561600	61561799		1	112050600	112050799		1	93837400	93837599		1	77018400	77019399		1	138066000	138066799
1	89064400	89064599		3	23930600	23933399		1	61563400	61563799		1	112240800	112242799		1	93847200	93847599		1	77078400	77079799		1	138168800	138168999
1	89097600	89097799		3	24039200	24039999		1	61581200	61581599		1	112248600	112248999		1	93857600	93857799		1	77090200	77090999		1	138231600	138231999
1	89288800	89289599		3	24708000	24708199		1	61593000	61594199		1	112291600	112291799		1	93890600	93891199		1	77093600	77095799		1	138252800	138252999
1	89292400	89292599		3	24788200	24789399		1	61678400	61678799		1	112298000	112298199		1	93930000	93930199		1	77198200	77200199		1	138402000	138402399
1	89334600	89334799		3	25108800	25108999		1	61729200	61730199		1	112322600	112323799		1	93975200	93975399		1	77220400	77222199		1	138499600	138499999
1	89372400	89373199		3	25110600	25110799		1	61780000	61780199		1	112325800	112325999		1	93993400	93993999		1	77234400	77235399		1	138548800	138549199
1	89402200	89402399		3	25412200	25414399		1	61787600	61788599		1	112459800	112459999		1	94022600	94022999		1	77260600	77260999		1	138631200	138631599
1	89406400	89406599		3	25427600	25429799		1	61796200	61796399		1	112493000	112493199		1	94029600	94029999		1	77329800	77330799		1	138689800	138690199
1	89411400	89411999		3	26804200	26804999		1	61864200	61864599		1	112514600	112514799		1	94045600	94045999		1	77354800	77354999		1	138701000	138701199
1	89457000	89457199		3	27043400	27043599		1	61865400	61866399		1	112516400	112517199		1	94048200	94048399		1	77376000	77376399		1	138705000	138705399
1	89477000	89477199		3	27063200	27063799		1	61907800	61908399		1	112611000	112612199		1	94081400	94081599		1	77415600	77415999		1	138841600	138841999
1	89560400	89560599		3	27547000	27547199		1	62018800	62019999		1	112814800	112817599		1	94136600	94136999		1	77526000	77526999		1	138844200	138845199
1	89603000	89603999		3	27765600	27765999		1	62072800	62073799		1	112854600	112854799		1	94448200	94448599		1	77549000	77549199		1	138852600	138853399
1	89683200	89683399		3	28136400	28138199		1	62077400	62077799		1	112991000	112991199		1	94473000	94474199		1	77573200	77573399		1	138964200	138964599
1	89685000	89685199		3	28629200	28630599		1	62096800	62098199		1	113008200	113009399		1	94619600	94619999		1	77626000	77626599		1	139031200	139031599
1	89696000	89696199		3	28829000	28830199		1	62107600	62107999		1	113038000	113038199		1	94640600	94640799		1	77673400	77673999		1	139038000	139038399
1	89738400	89738599		3	29218400	29218799		1	62116000	62116399		1	113121200	113121999		1	94765200	94765599		1	77685200	77685799		1	139291600	139292199
1	89756600	89756799		3	29578000	29579599		1	62172600	62172999		1	113133800	113135199		1	94788600	94788799		1	77854600	77855599		1	139436200	139436599
1	89831000	89831199		3	29890000	29891399		1	62180800	62180999		1	113169400	113170399		1	95064200	95064399		1	77929600	77930599		1	139556600	139556999
1	89845200	89845599		3	30329800	30330599		1	62196000	62196999		1	113244800	113244999		1	95141400	95142399		1	77974800	77975999		1	139630800	139631399
1	89847000	89847199		3	30343200	30343599		1	62209200	62209399		1	113320000	113320199		1	95194000	95194199		1	78010400	78011399		1	140098800	140099799
1	89868800	89868999		3	30363400	30364399		1	62267000	62267199		1	113399200	113399399		1	95271600	95271999		1	78067400	78067999		1	140298600	140298999
1	89925200	89925399		3	30499000	30502399		1	62272000	62272599		1	113410600	113410799		1	95310200	95310399		1	78108800	78110199		1	140386200	140386599
1	89989400	89989599		3	30526400	30526799		1	62290400	62291999		1	113448200	113448799		1	95312600	95312799		1	78121000	78121399		1	140441200	140442799
1	90021000	90021199		3	30629400	30631599		1	62295000	62295399		1	113464200	113464599		1	95409200	95409399		1	78142400	78142799		1	140585600	140586199
1	90325800	90325999		3	30782000	30782199		1	62333000	62333799		1	113481200	113481599		1	95457600	95458399		1	78195800	78196799		1	140707600	140707799
1	90431000	90431399		3	30933000	30933399		1	62339800	62339999		1	113507600	113507799		1	95669000	95669399		1	78325200	78326399		1	140732600	140733199
1	90502600	90502799		3	31071200	31072399		1	62365800	62366199		1	113547200	113547399		1	95725200	95726199		1	78371000	78371799		1	140802400	140802999
1	90549800	90549999		3	31100600	31101599		1	62378600	62378799		1	113577400	113578599		1	95775600	95776599		1	78423200	78423799		1	140826000	140826199
1	90553600	90553799		3	32483200	32483799		1	62565400	62566199		1	113658800	113658999		1	95792400	95792799		1	78452400	78452599		1	140842200	140842799
1	90558600	90558799		3	33043800	33045799		1	62571800	62572199		1	113741400	113741599		1	96072400	96072799		1	78506400	78507799		1	140889600	140889999
1	90592000	90592199		3	33066000	33066999		1	62583200	62584399		1	113800000	113800399		1	96093600	96094199		1	78518600	78519399		1	140982800	140983999
1	90884200	90884599		3	33157800	33158599		1	62624200	62624599		1	113933000	113934799		1	96227600	96227799		1	78552000	78552199		1	141021800	141022199
1	91015600	91015999		3	33320600	33321999		1	62670600	62670799		1	113962600	113962999		1	96384400	96384799		1	78559000	78559799		1	141104800	141106599
1	91041800	91042599		3	33478600	33478999		1	62811600	62813199		1	114008200	114008399		1	96419200	96419799		1	78564200	78564999		1	141161600	141163799
1	91068800	91068999		3	33683800	33683999		1	62841600	62842199		1	114037200	114037399		1	96437200	96438599		1	78594800	78596399		1	141273400	141274399
1	91071000	91071199		3	33921200	33922399		1	62844200	62844599		1	114054400	114055599		1	96455600	96455799		1	78646400	78646799		1	141439200	141439399
1	91084800	91084999		3	34036800	34036999		1	62858000	62858399		1	114126000	114126399		1	96527400	96528399		1	78689600	78690399		1	141475200	141475999
[truncated: 63,760 more rows]

## Sheet: Supplementary Table 6
Supplementary Table 6. GO anslysis of ChIP-seq.
GO analysis of ChIP-seq
GO Term	Count	PValue	FDR
[truncated: 99 more rows]

## Sheet: Supplementary Table 7
Supplementary Table 7. GO anslysis of integration between RNA-seq and ChIP-seq.
[truncated: 101 more rows]

[truncated: 5 more sheets: Supplementary Table 8, Supplementary Table 9, Supplementary Table 10, Supplementary Table 11, Supplementary Table 12]
